# Supplementary material for: Precision treatment exploration of breast cancer based on heterogeneity analysis of lncRNAs at the single-cell level
Source: BMC Cancer. 2021 Aug 13;21:918. doi: 10.1186/s12885-021-08617-7 (PMC8361656; doi:10.1186/s12885-021-08617-7)
Supplement: Supplementary file 3 — Additional file 3. lncRNA markers of lncRNA subtypes.xls. [file 12885_2021_8617_MOESM3_ESM.xls]

## Sheet: Supplementary data 2. lncRNA ma
# Supplementary data 2. lncRNA markers of lncRNA subtypes
Ensembl_ID	Name	Auroc	Clusts	Pvalue
ENSG00000260912.1	RP11-363E7.4	0.938883	C1	2.33554e-34
ENSG00000239453.1	SIDT1-AS1	0.823101	C1	8.87319e-26
ENSG00000272807.1	RP11-260M2.1	0.813425	C1	3.04549e-17
ENSG00000272991.1	AF129408.17	0.825687	C1	6.33644e-18
ENSG00000267576.1	CTC-510F12.6	0.936965	C1	2.98076e-28
ENSG00000235687.4	LINC00993	0.861083	C1	1.58301e-29
ENSG00000269887.1	RP11-477H21.2	0.783506	C1	1.01831e-20
ENSG00000270134.1	RP11-324E6.9	0.792431	C1	5.43899e-24
ENSG00000266922.1	CTC-499B15.6	0.703009	C1	2.31213e-09
ENSG00000229267.2	AC072062.1	0.887054	C1	1.64056e-38
ENSG00000272379.1	RP1-257A7.5	0.707842	C2	1.38604e-06
ENSG00000228830.1	RP4-781K5.2	0.738064	C2	9.85066e-10
ENSG00000224259.1	RP11-48O20.4	0.86957	C2	4.61106e-38
ENSG00000244468.1	RP11-206M11.7	0.893407	C2	1.79066e-18
ENSG00000260635.1	RP11-21M24.3	0.700312	C2	8.0778e-08
ENSG00000253802.1	CTA-392C11.1	0.715304	C3	4.03688e-23
ENSG00000268913.1	AC026806.2	0.808783	C3	1.01331e-18
ENSG00000260257.1	RP5-1085F17.3	0.712903	C3	0.000134145
ENSG00000130600.11	H19	0.994064	C4	4.80331e-54
ENSG00000266753.2	RP11-690G19.3	0.761752	C4	1.66313e-10
ENSG00000230937.5	MIR205HG	0.939596	C4	4.58527e-24
ENSG00000228639.2	AC005152.3	0.793329	C5	1.0137e-34
ENSG00000271553.1	RP11-274B21.10	0.712173	C6	0.00025201
ENSG00000273237.1	CTB-119C2.1	0.871445	C6	8.81887e-09
ENSG00000264019.1	RP11-6N17.6	0.778228	C6	0.000222946
ENSG00000255717.2	SNHG1	0.789249	C6	0.00011347
ENSG00000235123.1	DSCAM-AS1	0.939135	C6	1.0854e-22
ENSG00000260228.1	RP11-483P21.2	0.734855	C6	4.52139e-05
ENSG00000271204.1	RP11-138A9.1	0.790245	C6	0.000134145
ENSG00000260708.1	CTA-29F11.1	0.832622	C6	8.28112e-08
ENSG00000272009.1	RP1-313I6.12	0.819824	C6	3.98438e-06
ENSG00000228106.1	RP11-452F19.3	0.707338	C6	0.00054329
ENSG00000251141.1	RP11-53O19.1	0.875402	C7	1.19508e-12
ENSG00000223808.1	RP11-428L9.2	0.872104	C7	5.14666e-11
ENSG00000196668.3	LINC00173	0.721686	C7	3.65336e-05
ENSG00000248445.1	CTB-118N6.3	0.711229	C7	1.02166e-09
ENSG00000265962.1	RP11-674N23.1	0.948681	C7	1.2711e-50
ENSG00000228221.1	LINC00578	0.975869	C7	9.20399e-55
ENSG00000265737.1	RP11-1157N2__B.2	0.807272	C7	1.24195e-19
ENSG00000273437.1	RP11-434H6.7	0.727156	C7	0.000222946
ENSG00000269609.1	RP11-18I14.10	0.783623	C7	7.79269e-05
ENSG00000247271.2	ZBED5-AS1	0.771879	C7	0.000417985
ENSG00000232533.1	AC093673.5	0.701094	C7	0.00204873
ENSG00000234608.3	MAPKAPK5-AS1	0.730132	C7	0.00551753
