# Supplementary material for: Precision treatment exploration of breast cancer based on heterogeneity analysis of lncRNAs at the single-cell level
Source: BMC Cancer. 2021 Aug 13;21:918. doi: 10.1186/s12885-021-08617-7 (PMC8361656; doi:10.1186/s12885-021-08617-7)
Supplement: Supplementary file 4 — Additional file 4. DEGs of lncRNA subtypes.xls. [file 12885_2021_8617_MOESM4_ESM.xls]

## Sheet: C1
# Supplementary table 4.1. DEGs of lncRNA subtypes (C1)
Name	Ensembl_ID	Top	p.value	FDR	logFC.2	logFC.3	logFC.4	logFC.5	logFC.6	logFC.7
PPP1R14C	ENSG00000198729.4	1	1.4232e-67	4.45092e-64	8.49011	8.89822	5.32063	6.42287	8.89822	8.04946
RPL23	ENSG00000125691.8	1	1.02132e-61	2.66173e-58	5.32507	5.07098	5.75631	4.39508	4.85927	4.138
PIP	ENSG00000159763.3	1	2.17282e-60	4.24705e-57	8.47272	6.38069	10.4734	10.2641	8.26182	9.97657
GPRC5B	ENSG00000167191.7	1	5.02929e-35	1.82891e-32	6.18433	6.53669	5.81936	4.23024	5.98896	6.70491
RNF135	ENSG00000181481.9	2	8.58914e-59	1.34308e-55	6.66626	6.75738	6.69507	6.48513	4.88121	5.32543
TFAP2B	ENSG00000008196.8	2	6.51942e-52	7.28172e-49	2.43774	5.3991	5.3991	5.06665	5.3991	5.21974
SOX11	ENSG00000176887.5	3	4.9192e-61	1.09888e-57	4.59	7.50721	4.67581	4.48973	7.50721	7.15513
HLA-B	ENSG00000234745.5	3	9.41442e-60	1.6357e-56	-6.01032	-7.35793	-8.2833	-5.27334	-5.5303	-3.52606
CAMK2N1	ENSG00000162545.5	3	7.4205e-45	6.44635e-42	4.6501	3.62467	1.92964	4.87493	2.45386	1.90479
ITGB6	ENSG00000115221.6	4	1.23831e-50	1.21021e-47	6.57631	6.286	5.7404	6.3503	4.89292	6.55769
SEPP1	ENSG00000250722.1	4	6.37139e-42	4.98147e-39	6.1382	5.31397	8.19625	9.24057	2.29923	2.74211
SLC30A8	ENSG00000164756.8	4	1.04694e-27	1.83944e-25	6.77615	6.74288	6.77615	6.77615	6.50757	6.77615
DDAH1	ENSG00000153904.14	5	1.54749e-34	5.24941e-32	3.09222	6.0515	3.88125	4.13599	6.46255	1.43693
MGP	ENSG00000111341.5	6	1.15929e-38	7.25114e-36	12.7635	2.06911	11.7348	5.361	3.85916	14.1547
S100A10	ENSG00000197747.4	6	6.79625e-37	3.32103e-34	-5.30468	-4.30967	-5.29229	-7.35028	-5.79111	-2.87378
CDO1	ENSG00000129596.4	6	2.67685e-25	3.87572e-23	5.57763	5.58511	5.58511	5.2725	5.58511	5.58511
IFITM2	ENSG00000185201.12	7	4.52203e-52	5.4393e-49	-3.02627	-9.1741	-2.02064	-4.62002	-7.02176	-2.57388
TOP2A	ENSG00000131747.10	7	2.33251e-40	1.5858e-37	8.02007	8.14749	8.06283	8.19646	4.99347	8.28113
RP11-1407O15.2	ENSG00000174093.6	7	2.583e-37	1.39277e-34	5.587	5.36115	3.31389	5.1326	5.97768	4.87932
TMEM45A	ENSG00000181458.6	7	3.50955e-35	1.33851e-32	6.92345	5.7976	6.40904	6.73674	7.33919	7.22439
IFITM3	ENSG00000142089.11	9	4.95097e-51	5.16123e-48	-6.51278	-10.083	-4.97707	-7.45855	-7.76083	-3.57869
CCDC152	ENSG00000198865.5	9	1.04459e-34	3.71232e-32	5.95044	4.85877	6.16911	6.47357	4.68304	3.4011
PROM1	ENSG00000007062.7	9	4.01128e-30	8.54718e-28	2.7011	4.96806	2.74693	2.13546	5.06126	4.79667
GSTA4	ENSG00000170899.6	9	1.52919e-19	1.04877e-17	2.78062	3.7751	2.46791	3.27171	2.49502	4.80553
PADI2	ENSG00000117115.8	10	8.58796e-50	7.89941e-47	2.30704	5.42654	1.85256	2.98462	3.85311	5.45876
HLA-A	ENSG00000206503.7	10	2.76546e-37	1.44145e-34	-2.90169	-5.04469	-8.45493	-4.56778	-5.52225	-4.282
PHACTR2	ENSG00000112419.10	10	1.59458e-35	6.56168e-33	5.7721	5.16883	2.62081	4.16283	5.44037	2.30224
PCGF2	ENSG00000056661.9	11	1.34712e-37	7.52319e-35	6.00116	6.55771	5.38405	5.7244	6.79078	5.9227
PIP4K2B	ENSG00000141720.7	12	1.40135e-36	6.26082e-34	5.03046	5.24413	5.09211	4.67059	5.28718	4.72115
DCD	ENSG00000161634.7	12	2.1108e-19	1.4227e-17	6.92905	6.88534	6.75697	6.92905	6.92905	6.92905
CSTA	ENSG00000121552.3	13	3.06415e-36	1.33095e-33	5.15548	1.30408	5.42783	4.92679	3.07432	5.47907
THRSP	ENSG00000151365.2	13	1.15872e-31	2.78751e-29	5.81104	3.10027	6.31407	5.92997	6.07771	5.87781
LIMCH1	ENSG00000064042.13	14	8.65229e-41	6.44266e-38	5.2597	7.2856	4.48341	5.10344	7.50371	3.40194
CISD3	ENSG00000230055.2	14	3.71736e-35	1.38401e-32	6.1148	7.70499	7.68588	6.80923	6.75769	3.73292
SET	ENSG00000119335.12	14	2.78137e-34	9.06089e-32	2.62768	2.5715	3.38533	2.18575	2.45673	1.49118
MAPK10	ENSG00000109339.14	14	6.46369e-19	4.12542e-17	3.11603	3.36875	2.97231	3.67815	4.02261	4.02261
IDH1	ENSG00000138413.9	16	1.03285e-38	6.72943e-36	1.34733	7.0889	4.12735	3.71122	2.14792	2.05141
IBA57	ENSG00000181873.8	16	6.47923e-33	1.8421e-30	3.6897	4.46185	3.97856	4.16168	3.60663	3.7915
CD163L1	ENSG00000177675.4	16	6.56806e-26	9.97134e-24	3.38481	4.68124	4.0552	2.8164	4.95145	2.98194
PLEKHA5	ENSG00000052126.10	17	8.72579e-38	5.05353e-35	6.81358	8.55465	4.98782	7.25381	6.97068	7.63177
GSDMB	ENSG00000073605.14	18	1.56237e-32	4.0718e-30	5.91891	6.83588	3.53429	6.43221	3.59043	6.53463
SULT1E1	ENSG00000109193.6	18	3.85286e-25	5.42767e-23	7.14509	7.16123	6.98237	7.16123	7.16123	6.70838
NHSL1	ENSG00000135540.7	19	9.71098e-37	4.60153e-34	3.10656	5.29639	1.91237	2.53325	5.04625	3.07186
RBP1	ENSG00000114115.5	19	3.82187e-33	1.10671e-30	7.33118	6.33112	5.24574	6.94538	8.0593	7.9194
TBC1D3	ENSG00000197681.8	19	1.84955e-24	2.3902e-22	3.40536	3.482	2.19649	3.39147	3.5924	3.34706
FRMD8	ENSG00000126391.9	21	5.84159e-32	1.4733e-29	1.4617	4.62916	4.76985	2.81736	1.89854	2.08588
MLLT6	ENSG00000108292.12	22	3.18892e-35	1.24663e-32	4.92389	5.45578	4.54471	4.39646	5.7361	4.64183
PSMD3	ENSG00000108344.10	22	6.58147e-32	1.63356e-29	4.7229	4.52996	2.29972	4.34884	1.64514	4.13521
YWHAE	ENSG00000108953.12	23	4.9268e-31	1.14986e-28	2.50388	1.39098	2.3166	2.30527	2.72441	1.48686
FAM3B	ENSG00000183844.12	23	9.99559e-28	1.77615e-25	5.29981	5.31394	5.17209	5.43886	1.67759	5.13431
GPR126	ENSG00000112414.10	23	8.17592e-24	9.7593e-22	2.91017	4.0129	1.52039	3.17725	4.0129	3.46808
NF1	ENSG00000196712.12	26	4.07937e-25	5.64505e-23	5.80323	4.89198	5.17448	6.32005	3.95252	4.59289
PALMD	ENSG00000099260.6	26	2.83322e-23	3.05538e-21	1.17754	4.04268	3.72039	2.89943	4.04268	3.7645
QPRT	ENSG00000103485.13	27	4.51251e-25	6.13584e-23	3.61645	3.22776	2.46437	3.79477	1.28812	3.58078
LMO3	ENSG00000048540.10	27	6.39743e-23	6.58136e-21	5.48191	5.31975	4.10966	5.17554	5.48191	5.16436
SLC40A1	ENSG00000138449.6	28	1.83613e-30	3.98773e-28	2.81859	5.6343	4.94051	5.01313	4.46571	1.34068
SHPRH	ENSG00000146414.11	29	6.60122e-33	1.84327e-30	2.37925	4.73699	1.30512	3.57448	4.16037	2.74184
INTU	ENSG00000164066.8	29	3.24823e-22	3.11611e-20	1.83899	1.8334	2.31441	1.81318	3.23536	2.25214
BRD3	ENSG00000169925.12	30	6.79887e-33	1.86516e-30	3.26995	4.8856	3.31162	3.99375	3.44593	2.72274
C1orf63	ENSG00000117616.13	30	3.40529e-22	3.24686e-20	-3.20576	-1.31686	-2.69783	-1.85352	-5.8602	-1.47409
TBC1D3F	ENSG00000185128.11	31	1.1756e-21	1.0626e-19	3.42381	3.5013	1.94883	3.51714	3.61085	3.45805
MED24	ENSG00000008838.13	32	2.92927e-28	5.45298e-26	5.6664	5.57506	1.79896	4.97955	2.37843	5.28938
NPNT	ENSG00000168743.8	32	1.56037e-21	1.3785e-19	1.17837	2.83	3.79438	3.69701	4.34143	3.95901
PTPRC	ENSG00000081237.14	33	2.08719e-32	5.3504e-30	2.01571	4.81531	3.78194	4.10792	1.20443	4.38078
LDHB	ENSG00000111716.8	33	2.02201e-26	3.29123e-24	-4.27781	-1.68904	-7.91097	-7.10753	-3.44197	-9.57011
ACADSB	ENSG00000196177.8	33	1.86768e-23	2.13175e-21	3.77343	3.01225	4.39155	5.60953	1.79538	1.4524
DOCK8	ENSG00000107099.11	33	5.51413e-18	3.07944e-16	1.69617	2.69674	2.94943	2.68659	1.70237	2.89592
ENPP1	ENSG00000197594.7	34	1.94813e-23	2.20746e-21	4.68843	4.55136	3.6892	4.96992	5.03715	5.16485
MRPL45	ENSG00000174100.5	35	1.1826e-31	2.80186e-29	7.25761	8.53676	4.59575	6.48173	6.55557	4.20496
NRIP3	ENSG00000175352.6	37	4.36903e-28	7.94402e-26	4.21429	5.08739	4.8623	4.52921	4.737	4.83019
SAMD12	ENSG00000177570.9	38	2.6635e-25	3.87572e-23	3.6958	3.18172	2.66521	3.00082	2.62264	1.88109
RASSF3	ENSG00000153179.7	39	3.1216e-25	4.43749e-23	3.88958	3.51014	4.37041	2.67478	2.31863	2.37038
MSL1	ENSG00000188895.7	40	1.47592e-29	2.98108e-27	5.93846	7.26348	1.09448	5.74845	2.56735	5.67598
ALDH2	ENSG00000111275.8	40	1.74037e-27	2.95807e-25	3.48254	4.08653	3.11761	3.75304	1.19257	3.47688
INSR	ENSG00000171105.9	40	8.59778e-25	1.13935e-22	3.30155	2.91409	4.23807	2.02706	3.37959	1.5968
PNMT	ENSG00000141744.3	40	1.51336e-20	1.18917e-18	4.4842	4.52799	4.26042	4.52799	4.41602	4.11139
MGAT4A	ENSG00000071073.8	41	2.2398e-22	2.2167e-20	3.36319	4.39534	2.40903	4.47031	2.25961	1.53409
MDK	ENSG00000110492.11	42	1.48701e-29	2.98108e-27	5.29801	6.87501	3.39257	4.86731	7.00176	7.0255
ATF3	ENSG00000162772.12	42	5.91522e-25	7.90567e-23	-5.30642	-1.23465	-2.17604	-2.39548	-3.87779	-2.43935
SRCIN1	ENSG00000017373.11	42	3.64252e-23	3.84852e-21	2.47269	2.52715	2.5279	2.45276	2.32527	2.28873
RAB3D	ENSG00000105514.3	43	4.29004e-22	4.04116e-20	3.3866	5.11718	2.99556	5.33657	2.81825	1.70786
S100A8	ENSG00000143546.5	43	1.86417e-19	1.26191e-17	1.74534	5.6964	3.34598	4.19338	5.72911	5.25763
B2M	ENSG00000166710.13	44	6.14228e-29	1.18576e-26	-2.49158	-3.71026	-2.72777	-1.04474	-3.33507	-2.03552
KIF13B	ENSG00000197892.8	44	4.38834e-22	4.10901e-20	2.8954	3.19367	3.11895	4.08927	3.29768	3.84981
PTPRS	ENSG00000105426.10	45	2.95133e-24	3.72177e-22	2.49117	2.28312	4.2642	2.78849	5.36525	3.33127
MLTK	ENSG00000091436.12	45	2.30722e-22	2.26906e-20	4.79805	5.51821	4.90879	5.00906	5.54056	4.03275
NFKBIA	ENSG00000100906.6	46	3.10266e-24	3.88131e-22	-3.61561	-3.4991	-4.88468	-2.20233	-4.02373	-1.68462
ALCAM	ENSG00000170017.8	46	1.32303e-18	8.08133e-17	-1.67004	1.72813	3.23132	2.36065	3.99564	-3.51342
PSMB3	ENSG00000108294.4	50	2.55381e-24	3.24666e-22	5.09407	4.98472	5.91393	4.96323	5.0449	4.38083
LRRC1	ENSG00000137269.10	51	5.81973e-21	4.80682e-19	4.27238	4.0439	3.07274	5.40655	3.68495	4.76302
MCL1	ENSG00000143384.8	52	3.35066e-24	4.15827e-22	-4.32523	-2.23796	-2.91886	-2.41841	-3.05014	-1.79523
HBS1L	ENSG00000112339.10	53	1.28626e-26	2.11719e-24	2.16674	6.11403	1.87047	4.2642	2.57088	2.80996
FAM46A	ENSG00000112773.11	53	5.93815e-23	6.14933e-21	-5.26643	-4.59369	-5.74456	-1.87469	-3.11806	-2.88619
CSF3R	ENSG00000119535.13	53	2.02768e-17	1.04643e-15	3.3657	2.86481	3.0475	3.09728	3.47377	3.12865
BRD2	ENSG00000204256.8	54	2.22037e-17	1.13094e-15	-3.27998	-2.31176	-3.31571	-1.77245	-4.99928	-2.16678
PPIL4	ENSG00000131013.3	55	2.66473e-26	4.25188e-24	1.51176	5.27835	1.72878	3.10036	2.72636	3.26328
ERBB2	ENSG00000141736.9	55	4.75163e-23	4.95342e-21	4.86721	5.92137	1.55677	5.46162	1.63295	5.33513
CSMD3	ENSG00000164796.13	55	4.89e-18	2.77047e-16	2.99773	2.99773	2.99773	2.99773	2.99773	2.81073
MPHOSPH6	ENSG00000135698.5	56	2.96654e-26	4.63877e-24	3.11226	5.38319	2.00095	4.33879	3.54909	1.02207
SLC35F2	ENSG00000110660.10	57	1.99135e-23	2.24019e-21	5.04137	5.90131	4.7699	5.05687	5.85283	1.45374
ORMDL3	ENSG00000172057.5	57	3.30022e-23	3.51058e-21	6.4446	6.61692	2.60343	6.29386	2.38012	6.47725
MLLT3	ENSG00000171843.11	63	5.67736e-22	5.22217e-20	1.52551	4.03093	4.54357	3.34359	4.27253	2.54351
CWC25	ENSG00000108296.7	63	2.14236e-19	1.43777e-17	3.28448	4.47092	4.16528	5.59443	4.73709	5.40182
CASC3	ENSG00000108349.10	64	1.4043e-24	1.84529e-22	6.01913	6.95739	1.89539	5.60187	3.32868	4.359
TAPBP	ENSG00000231925.7	64	4.85603e-16	1.98779e-14	-2.91197	-1.4955	-2.89902	-1.87556	-3.61544	-1.51168
CAMK2D	ENSG00000145349.12	65	3.50109e-24	4.31075e-22	3.03794	5.31812	2.83458	2.7827	4.32873	4.74411
AC090186.1	ENSG00000232941.1	65	2.41672e-21	2.07639e-19	2.09892	5.02822	7.07233	3.22234	2.16058	1.88523
UGDH	ENSG00000109814.7	65	9.9289e-19	6.21033e-17	2.2806	3.33621	2.0737	4.99095	1.97587	2.61041
KLF4	ENSG00000136826.10	67	3.03662e-21	2.58063e-19	-4.23641	-1.37474	-3.94185	-2.85615	-3.33689	-1.05006
PLA2G16	ENSG00000176485.6	67	3.34315e-18	1.94338e-16	3.92551	3.70026	3.91785	3.08635	-1.11773	-3.37524
KIT	ENSG00000157404.11	67	2.78131e-16	1.19155e-14	3.07326	3.17232	1.97178	2.41239	3.17232	2.99685
ABRACL	ENSG00000146386.7	68	1.06197e-23	1.24857e-21	1.40408	7.70498	1.74475	4.95945	3.65772	4.8783
MIEN1	ENSG00000141741.7	68	2.8092e-22	2.72841e-20	6.87899	7.20986	2.31344	6.49932	2.27994	4.51225
ZNRF2	ENSG00000180233.9	68	6.43918e-21	5.25808e-19	1.92723	2.89266	3.19831	3.04931	1.97865	1.84569
PPP1R15A	ENSG00000087074.7	70	1.7326e-21	1.52206e-19	-4.10363	-1.15427	-2.1794	-1.12281	-3.87831	-1.08969
TTC6	ENSG00000139865.12	73	3.3806e-18	1.95787e-16	1.62979	1.93151	1.92536	3.46926	2.80708	1.36546
AHSA1	ENSG00000100591.3	74	1.41256e-15	5.3353e-14	-1.57943	-1.38863	-1.7636	-1.2429	-4.27171	-1.59491
FGF12	ENSG00000114279.9	74	7.16381e-14	1.96873e-12	3.04232	2.50483	2.58375	3.07234	2.51392	3.21509
S100P	ENSG00000163993.6	75	2.96187e-20	2.23743e-18	-2.59733	2.62034	-5.46745	-2.80459	-1.92998	2.32387
TMEM132A	ENSG00000006118.10	75	7.68873e-14	2.1019e-12	1.29294	2.01194	1.00432	1.39591	2.03475	2.11885
ABCC4	ENSG00000125257.9	77	1.46884e-15	5.52122e-14	1.75105	2.99561	1.12033	2.52995	3.04018	2.36708
TSPAN1	ENSG00000117472.5	78	2.101e-17	1.0807e-15	2.09987	1.69251	1.61126	4.0178	-2.22487	-2.11762
ACPL2	ENSG00000155893.7	78	1.60966e-15	6.00724e-14	2.24421	2.7845	2.54252	1.89074	2.85684	1.93893
CDK12	ENSG00000167258.9	79	7.25731e-20	5.25382e-18	1.72067	1.47907	-2.69337	1.76153	1.11467	1.20279
CTSH	ENSG00000103811.11	80	8.06918e-20	5.78797e-18	1.51599	3.5016	4.06252	2.66439	1.64254	1.27782
HLA-E	ENSG00000204592.5	82	1.43641e-19	9.93853e-18	-3.42049	-2.35345	-4.31359	-1.8517	-3.09739	-1.55122
FKBP9	ENSG00000122642.6	84	5.589e-20	4.12242e-18	4.43485	2.15031	3.02222	2.7847	2.97294	1.6724
SMIM14	ENSG00000163683.7	85	4.63709e-17	2.30191e-15	1.38824	3.94459	2.43585	4.9039	2.55102	1.10019
KMO	ENSG00000117009.7	86	1.0768e-19	7.61899e-18	3.51625	4.6455	2.55751	4.37443	3.32801	4.21051
AGPAT5	ENSG00000155189.7	88	1.40978e-19	9.79767e-18	3.3293	3.53168	3.50512	2.88819	2.69728	2.27378
RAP2C	ENSG00000123728.5	88	9.15888e-17	4.32681e-15	3.17728	2.0452	2.49269	4.7255	1.11086	2.97507
PPFIBP2	ENSG00000166387.7	90	1.27091e-21	1.13561e-19	3.69527	4.65266	1.80543	4.08023	4.1451	3.55155
WASF3	ENSG00000132970.8	90	5.81471e-15	1.94283e-13	2.59579	1.93992	1.84067	2.14705	2.79103	1.99846
HENMT1	ENSG00000162639.11	91	1.76613e-21	1.54285e-19	2.21159	4.72413	4.03249	3.3271	1.79013	3.22901
EIF4A3	ENSG00000141543.5	92	6.13277e-15	2.04038e-13	-2.47803	-1.28583	-1.80914	-1.83251	-4.74038	-1.51306
CST6	ENSG00000175315.2	94	3.6417e-15	1.25947e-13	2.80471	2.08187	2.71189	2.16002	2.80471	2.54758
2019-03-02	ENSG00000099785.6	95	1.12268e-18	6.96643e-17	2.16582	2.29423	2.6502	2.20656	2.47244	1.1601
ELF5	ENSG00000135374.5	97	1.72805e-20	1.3377e-18	1.83791	4.37907	3.59159	1.85104	3.7768	4.07864
SDCCAG8	ENSG00000054282.11	98	1.65285e-20	1.28585e-18	1.92636	4.73409	2.14908	1.88636	3.15896	1.62809
IL6ST	ENSG00000134352.15	98	7.24343e-18	3.97423e-16	-2.9287	-5.5777	-3.10963	-2.11568	-6.63485	-5.44291
ANKRD12	ENSG00000101745.11	99	1.46745e-14	4.60773e-13	-3.02951	-2.4008	-3.26043	-1.67516	-4.03703	-2.70041
TNFSF10	ENSG00000121858.6	100	3.17715e-18	1.86071e-16	1.77517	5.22958	5.56645	5.52955	3.85028	6.7243
SCOC	ENSG00000153130.13	103	2.77656e-16	1.19155e-14	4.31406	5.42236	3.9903	4.71773	4.35924	2.09423
EPN2	ENSG00000072134.11	104	5.46063e-20	4.04682e-18	1.98841	4.12694	3.0213	2.8841	2.73915	2.87614
PTPLAD1	ENSG00000074696.8	104	2.64486e-15	9.37816e-14	3.11544	2.78916	4.35627	4.85505	1.38321	4.03923
IL1RN	ENSG00000136689.14	104	1.48758e-12	3.25788e-11	2.48891	2.63493	1.76475	2.41636	2.23962	2.84036
NEIL2	ENSG00000154328.11	105	5.86628e-20	4.30662e-18	3.59367	4.12842	2.94463	1.89615	2.65289	1.07299
ADAM10	ENSG00000137845.10	106	3.401e-18	1.96241e-16	4.26268	4.88282	4.01993	3.98985	4.49455	2.39418
CEP57L1	ENSG00000183137.10	106	1.46005e-15	5.50139e-14	2.20967	3.47879	2.29552	3.4678	2.52685	2.0411
AIF1L	ENSG00000126878.8	107	1.32193e-19	9.26955e-18	2.54848	3.26074	3.03039	2.115	1.20342	1.94053
SNURF	ENSG00000273173.1	107	1.66857e-16	7.49122e-15	2.69935	4.82319	3.83304	4.49152	3.14396	2.01655
ATF4	ENSG00000128272.10	107	3.15788e-15	1.10223e-13	-3.65461	-2.336	-3.17628	-2.42161	-3.39549	-3.82824
IGFBP2	ENSG00000115457.5	110	2.36274e-15	8.53259e-14	2.84326	2.58098	1.43958	2.84326	2.36436	2.50147
FCGRT	ENSG00000104870.8	112	1.71822e-17	8.95593e-16	3.45255	2.15809	3.41387	1.88628	-1.19786	1.06054
TXLNB	ENSG00000164440.10	112	3.27322e-15	1.13994e-13	2.00769	2.04251	2.18165	2.19444	1.52846	2.08432
AIG1	ENSG00000146416.12	113	6.27528e-15	2.08337e-13	1.84649	3.00369	2.36408	3.69259	3.2329	1.85284
CCDC28A	ENSG00000024862.12	115	3.83773e-19	2.52145e-17	2.29673	3.70016	1.47504	3.25369	2.37996	2.17967
GRB14	ENSG00000115290.5	116	2.78474e-15	9.80742e-14	4.0888	4.15983	4.11351	4.06942	1.71067	3.42702
EIF5	ENSG00000100664.6	116	8.89247e-14	2.40991e-12	-2.38775	-1.75577	-1.59232	-1.06028	-4.04903	-1.56944
MMEL1	ENSG00000142606.11	117	3.949e-12	7.94731e-11	2.57957	2.81617	2.31965	2.66877	2.2638	2.90088
PSMB8	ENSG00000204264.4	118	7.36989e-17	3.53506e-15	-2.10001	-3.72606	-5.35469	-1.33528	-3.52869	-1.81532
CT45A1	ENSG00000232478.4	118	6.62458e-13	1.55073e-11	2.55013	2.55013	2.55013	2.55013	2.55013	2.55013
NOTCH3	ENSG00000074181.4	119	1.21334e-15	4.67315e-14	1.3447	2.1134	1.95214	1.2216	2.37071	2.24524
IRF1	ENSG00000125347.9	121	9.27599e-17	4.35581e-15	-3.53749	-1.22737	-4.26304	-1.56943	-4.10374	-1.86523
SERHL2	ENSG00000183569.13	122	9.51295e-17	4.44042e-15	2.02146	4.51118	4.73748	3.89705	2.62107	3.18309
ADCY5	ENSG00000173175.10	123	5.73049e-15	1.91879e-13	2.45589	2.45589	2.19117	2.45589	1.9584	2.21903
FAM171B	ENSG00000144369.8	123	1.90283e-13	4.81465e-12	3.38655	3.56674	3.01449	2.27052	3.56024	3.73584
TRIM5	ENSG00000132256.14	124	1.72865e-14	5.34208e-13	2.64734	3.98365	2.83686	4.13497	4.16692	2.38032
CYB5R2	ENSG00000166394.10	124	6.57041e-12	1.26841e-10	1.43758	2.68387	2.48121	1.9812	2.71889	2.76331
SDC1	ENSG00000115884.6	125	2.71164e-18	1.61839e-16	1.04945	5.07607	1.7453	1.55505	4.12791	4.84703
ALDH3B2	ENSG00000132746.10	125	1.87248e-14	5.71875e-13	1.93225	1.31918	2.94877	3.32906	3.04437	2.10293
VTA1	ENSG00000009844.11	126	3.22108e-18	1.8794e-16	2.97451	5.54496	2.34743	4.67721	3.68901	2.66796
MT1E	ENSG00000169715.10	126	4.29708e-18	2.4434e-16	-1.32171	-5.88299	-2.91455	-2.02682	-7.33618	-6.87746
CBX6	ENSG00000183741.7	126	2.14069e-16	9.38911e-15	2.4289	2.33851	2.78777	1.23558	1.8625	-1.40125
UGCG	ENSG00000148154.5	126	1.88965e-14	5.75993e-13	1.22107	2.12231	1.74843	4.09808	-1.35848	1.60464
AMOTL1	ENSG00000166025.13	127	3.39126e-13	8.20883e-12	2.08853	2.08853	1.53676	1.65535	2.03925	1.98907
C1orf123	ENSG00000162384.9	129	4.18331e-18	2.38739e-16	2.00855	3.90701	2.72856	2.21439	1.55005	1.32676
NUP43	ENSG00000120253.9	129	1.67087e-16	7.49122e-15	2.48276	4.15597	2.30913	3.55147	3.39278	2.26952
TBC1D24	ENSG00000162065.7	129	3.76888e-16	1.58e-14	2.4056	3.90565	4.14247	2.21225	4.18368	3.31596
DCAKD	ENSG00000172992.7	130	7.10813e-17	3.41999e-15	2.59873	1.54936	2.37887	1.37133	2.39403	1.2739
PIK3C2G	ENSG00000139144.5	130	1.1428e-13	3.00841e-12	2.11518	2.97708	2.82665	2.76011	2.52474	2.99371
FOSB	ENSG00000125740.9	133	9.49326e-17	4.44042e-15	-3.8317	-1.84794	1.13398	-1.75049	-3.37917	2.0329
MYLIP	ENSG00000007944.10	134	9.86198e-17	4.58963e-15	-4.14706	-2.18735	-3.05946	-1.19403	-3.95847	-1.15985
REEP3	ENSG00000165476.8	134	1.02136e-15	3.9729e-14	2.25399	3.4461	4.4391	3.38415	3.66304	2.83073
AP3S1	ENSG00000177879.10	134	5.23543e-15	1.75679e-13	4.31826	4.43937	3.90211	4.56656	2.66177	1.98211
COL21A1	ENSG00000124749.12	135	3.30033e-12	6.73724e-11	2.45604	2.87925	1.98613	2.87108	2.87925	2.87925
NFIA	ENSG00000162599.11	136	1.07802e-13	2.86682e-12	1.1039	1.72678	1.03144	3.73232	3.5878	1.41391
THBS1	ENSG00000137801.9	138	1.67196e-16	7.49122e-15	-5.0792	-3.239	-2.39876	-2.74059	-5.21366	-1.44919
TUFT1	ENSG00000143367.11	138	1.6533e-12	3.57575e-11	-3.62583	-2.30322	-2.2098	-1.06793	-5.32802	-3.40822
EGR1	ENSG00000120738.7	141	2.02842e-16	8.96002e-15	-4.2938	-3.97054	-2.63703	-2.09008	-4.07178	2.02898
PEX3	ENSG00000034693.10	142	8.5403e-18	4.58916e-16	1.51015	3.89105	1.2553	3.15978	2.56665	1.09095
RAD23B	ENSG00000119318.8	142	1.92073e-13	4.84426e-12	1.82695	3.19017	1.70382	2.83894	1.92543	1.15127
QKI	ENSG00000112531.12	144	7.96196e-16	3.15993e-14	-4.28021	-1.24446	-4.75184	-3.09122	-2.16433	-1.75437
SNRPN	ENSG00000128739.16	145	2.36038e-15	8.53259e-14	2.6924	4.00172	3.20371	3.64267	2.89404	2.00443
CT45A3	ENSG00000232417.5	145	2.26127e-13	5.63948e-12	2.70543	2.70543	2.70543	2.70543	2.70543	2.42109
CASP6	ENSG00000138794.5	146	2.19155e-17	1.11991e-15	2.15655	4.69031	3.20094	3.5129	3.56994	3.04945
C1orf56	ENSG00000143443.9	146	3.1309e-15	1.09525e-13	2.65371	2.06814	3.67676	1.42395	4.23486	1.35121
GPX1	ENSG00000233276.2	146	1.46465e-11	2.61746e-10	-1.01429	-2.37816	-2.58079	-3.50377	-4.77466	-5.42891
SCGB2A1	ENSG00000124939.4	147	7.51731e-13	1.73888e-11	1.74322	3.56035	4.16023	4.04167	4.18859	3.80322
ECHDC1	ENSG00000093144.14	149	2.5e-17	1.26105e-15	3.19216	3.55921	3.05688	1.24483	2.73081	-1.10297
TIMM8B	ENSG00000150779.7	149	3.8678e-15	1.33218e-13	2.85736	4.58846	4.21243	3.2161	1.87101	1.06959
RBM47	ENSG00000163694.10	150	1.22314e-15	4.69932e-14	1.13481	3.9362	2.1481	3.60687	1.49155	1.07021
LGALSL	ENSG00000119862.8	151	3.20836e-17	1.60285e-15	2.55223	3.97394	1.04965	2.52808	3.54909	2.66939
CLEC3A	ENSG00000166509.6	151	9.04373e-14	2.44666e-12	2.77669	4.88056	4.87262	4.78726	3.98537	4.30224
ACTN2	ENSG00000077522.8	153	1.08768e-14	3.46397e-13	2.91645	3.04892	3.1215	2.92937	2.90676	2.76607
SIX1	ENSG00000126778.7	153	2.1516e-14	6.4577e-13	2.53603	3.91145	1.87099	3.87247	1.77769	3.78881
PIGR	ENSG00000162896.5	154	2.52916e-12	5.28724e-11	2.2025	2.56622	2.70864	2.98441	3.07866	2.85209
CAMLG	ENSG00000164615.3	155	3.636e-11	5.96136e-10	-1.07135	-1.33323	-1.07315	-1.12858	-2.41113	-4.68373
METTL5	ENSG00000138382.9	157	1.00771e-16	4.67583e-15	1.77188	4.59545	2.66837	1.76531	2.18786	-1.10904
FAR2	ENSG00000064763.6	157	3.27725e-12	6.71338e-11	1.42621	2.66421	1.08318	2.10597	2.91859	2.53299
PLXND1	ENSG00000004399.8	158	1.15695e-12	2.59187e-11	2.06163	2.40477	1.29271	2.44262	1.84278	1.93816
STOML2	ENSG00000165283.11	160	1.31675e-16	6.0029e-15	2.00366	3.98822	1.68004	1.14599	1.15011	-1.36639
ZMYND8	ENSG00000101040.15	161	1.37462e-12	3.0403e-11	1.50315	2.05319	1.28051	3.4291	1.73751	1.65526
PCMT1	ENSG00000120265.12	163	1.32169e-15	5.04081e-14	3.2803	5.56033	2.18573	4.3702	3.41979	2.22375
S100A13	ENSG00000189171.9	163	4.98164e-12	9.87299e-11	1.48753	-1.6541	-2.01664	-1.82565	-3.68337	-2.45253
PER2	ENSG00000132326.7	165	1.49929e-14	4.68889e-13	1.88985	2.5425	4.53312	4.23838	2.85529	3.11773
GTF2A2	ENSG00000140307.6	166	1.78206e-12	3.83302e-11	1.80845	3.46304	2.95474	4.53969	1.72502	1.11822
GPX4	ENSG00000167468.12	168	2.95214e-16	1.25784e-14	1.0135	5.49147	2.13572	2.03743	2.88983	1.5702
SNAP23	ENSG00000092531.5	168	2.04897e-12	4.37701e-11	1.7123	2.90942	3.49357	4.28644	2.06321	1.6802
GLB1	ENSG00000170266.11	169	3.31575e-16	1.40892e-14	1.59829	3.91057	2.02766	2.97076	2.51694	1.71624
NUPR1	ENSG00000176046.7	169	3.3819e-15	1.17257e-13	-4.51073	-2.06222	-1.1238	-3.29544	-1.99209	-4.40431
FDFT1	ENSG00000079459.8	169	2.57672e-12	5.37228e-11	2.13096	4.48016	2.61749	4.10776	2.35392	2.31672
ERRFI1	ENSG00000116285.8	170	2.31581e-14	6.92396e-13	-2.18575	-2.99552	-4.06006	-1.10971	-2.76597	-3.1369
DUSP1	ENSG00000120129.5	172	7.04869e-15	2.32043e-13	-4.32605	-1.27024	-2.1024	-1.90837	-3.47036	-1.92546
SOX4	ENSG00000124766.4	172	2.64148e-14	7.79335e-13	-2.14099	-1.43113	-2.95893	-1.72008	-2.82558	-1.715
NLRC5	ENSG00000140853.11	173	2.90413e-14	8.52004e-13	-2.87714	-1.36221	-5.27718	-1.63536	-2.11412	-1.88543
SIDT1	ENSG00000072858.6	173	3.72842e-12	7.53826e-11	1.41166	1.94055	1.81308	2.79868	2.03928	1.81796
ECM1	ENSG00000143369.10	175	1.3733e-12	3.0403e-11	2.73923	3.05704	2.82229	2.9891	2.54435	2.85909
UBA6	ENSG00000033178.8	179	6.31986e-12	1.22458e-10	1.86131	3.40466	1.25329	3.41288	3.49242	1.99631
TMEM159	ENSG00000011638.6	181	1.04715e-14	3.34169e-13	1.57207	3.5986	2.97939	1.40193	4.4625	2.38408
PXMP4	ENSG00000101417.7	181	5.29562e-14	1.48935e-12	3.37646	2.46065	3.51845	2.31648	1.01378	1.21849
IFT122	ENSG00000163913.7	181	4.04547e-13	9.68745e-12	1.64399	3.09736	2.78543	2.88207	1.40646	2.06393
ELF3	ENSG00000163435.11	183	1.70901e-14	5.29184e-13	-4.1855	-4.02537	-1.90289	-1.88658	-2.77615	-1.96289
SEMA3C	ENSG00000075223.9	187	3.44162e-14	9.98454e-13	-2.81232	-3.99151	-4.00213	-2.2452	-3.17785	-1.39679
ZNF823	ENSG00000197933.8	187	1.35523e-11	2.43582e-10	3.38613	1.72643	3.56849	3.79187	1.36037	2.87621
STRN3	ENSG00000196792.7	189	2.18663e-11	3.77399e-10	-2.80158	-3.00474	-2.89887	-2.43649	-3.33745	-3.62592
VSNL1	ENSG00000163032.7	190	7.66294e-12	1.44892e-10	3.25425	4.03038	4.02466	3.48659	3.99024	3.64197
ZC3H4	ENSG00000130749.5	196	5.22767e-14	1.47554e-12	2.61455	1.83307	2.66202	1.47811	1.86434	1.83825
SFXN1	ENSG00000164466.8	206	1.80476e-12	3.87119e-11	2.4127	3.47481	3.32737	3.51711	2.18292	-1.08466
IFRD1	ENSG00000006652.9	208	1.13652e-13	3.00014e-12	-4.1708	-3.04512	-1.71113	-2.02096	-3.97339	-2.88938
MTSS1	ENSG00000170873.14	212	8.49638e-15	2.75068e-13	1.03367	3.18639	2.39304	1.30806	-1.49499	-1.72036
VMP1	ENSG00000062716.6	212	7.13787e-11	1.11615e-09	-2.71991	-2.73482	-1.88031	-1.87586	-4.07246	-2.28912
EXOSC4	ENSG00000178896.6	214	9.88563e-15	3.17416e-13	2.7983	3.36647	2.33272	1.17156	1.66776	-1.48218
NFAT5	ENSG00000102908.16	214	8.06421e-11	1.24482e-09	-1.59277	-1.15067	-2.11927	-1.06251	-3.59277	-1.38949
TMEM25	ENSG00000149582.11	217	9.59622e-11	1.46396e-09	1.8115	1.99667	2.30456	2.36396	1.70143	-1.02831
PLCB1	ENSG00000182621.12	218	5.18771e-10	6.78004e-09	1.22053	1.79449	-1.52293	1.26555	1.44849	1.79449
EZR	ENSG00000092820.13	219	9.97117e-11	1.51231e-09	1.50361	2.66637	1.36516	3.06244	2.42742	2.79427
ZNF518B	ENSG00000178163.3	222	1.56961e-14	4.88924e-13	1.01637	3.33224	1.84849	2.12248	2.23393	2.90713
MGA	ENSG00000174197.12	224	8.57e-13	1.95634e-11	1.50968	2.11295	3.16187	1.83941	2.88501	2.65518
PDK1	ENSG00000152256.9	226	1.70994e-10	2.46892e-09	2.04732	2.67324	1.11689	1.8284	3.49157	2.2335
TAT	ENSG00000198650.6	229	3.7309e-10	5.02932e-09	2.83966	2.85634	2.90458	2.90537	2.90897	2.90897
GLTP	ENSG00000139433.5	231	2.59606e-14	7.68836e-13	2.6568	4.50778	3.09122	3.19465	1.27212	3.57811
DDX24	ENSG00000089737.11	231	2.36404e-10	3.30944e-09	-2.22383	-1.426	-1.53767	-1.64837	-2.76889	-2.03995
MBOAT1	ENSG00000172197.9	232	7.26491e-13	1.6905e-11	-3.85676	-3.36254	-2.13404	-2.92638	-3.9618	-2.02742
SELK	ENSG00000113811.6	232	1.50239e-09	1.77439e-08	-1.93282	-2.00823	-2.70357	-1.70153	-2.99011	-3.01451
DCTN6	ENSG00000104671.3	233	2.69427e-14	7.93413e-13	1.69977	3.99947	1.75676	2.61356	1.61391	1.01616
TAP1	ENSG00000168394.9	233	1.53842e-12	3.35981e-11	-1.50916	-1.53874	-4.23583	-1.6804	-1.94822	-1.08833
CD47	ENSG00000196776.10	234	7.48007e-13	1.73283e-11	-3.41667	-2.30095	-1.85441	-3.01024	-2.40155	-2.70793
RIOK3	ENSG00000101782.10	238	9.4562e-13	2.14299e-11	-3.458	-1.99745	-2.78347	-2.59187	-4.58698	-3.10244
ZBTB44	ENSG00000196323.7	239	2.23361e-12	4.74551e-11	1.32379	3.63351	3.74402	3.20821	1.37584	2.20681
SQSTM1	ENSG00000161011.15	241	2.43096e-12	5.12305e-11	-2.82365	-1.53691	-2.92414	-1.78822	-2.56509	-2.43118
ARID2	ENSG00000189079.11	241	1.30892e-10	1.92908e-09	2.80411	3.03952	1.11269	3.15607	1.93253	4.08167
CAP1	ENSG00000131236.12	242	6.21785e-14	1.71479e-12	1.23001	4.65063	2.93702	3.60707	2.00754	2.25916
PIK3C2B	ENSG00000133056.9	243	5.835e-14	1.62352e-12	1.11333	2.19721	1.85224	1.56129	1.7549	1.48721
MRPL14	ENSG00000180992.5	243	1.65831e-12	3.58162e-11	3.7239	3.91067	2.35232	2.64189	2.38573	1.44851
MMAB	ENSG00000139428.7	243	3.26948e-10	4.43792e-09	1.69275	2.4232	2.24519	2.86911	1.14674	1.59187
CYLD	ENSG00000083799.13	245	3.13545e-12	6.47675e-11	-1.7796	-1.01474	-3.47622	-1.73095	-2.96788	-2.04662
STRBP	ENSG00000165209.14	249	2.21941e-12	4.72175e-11	2.91814	3.03951	2.69666	1.83641	1.66125	1.09184
WRB	ENSG00000182093.10	251	4.41887e-12	8.84104e-11	2.1774	3.42388	3.5082	3.27038	2.18191	1.04534
RBM34	ENSG00000188739.10	252	2.52745e-12	5.28724e-11	-2.9772	1.52645	-1.24552	-1.89804	-2.01142	-1.36265
RGPD2	ENSG00000185304.12	254	1.44945e-12	3.18649e-11	2.41477	2.44366	2.35021	2.10602	1.95223	2.21524
SUSD2	ENSG00000099994.10	258	5.97057e-12	1.16266e-10	2.13784	1.97458	1.96116	1.88531	1.92495	2.0183
OPTN	ENSG00000123240.12	259	6.04572e-12	1.17583e-10	-2.45169	-1.28598	-3.20709	-2.62633	-1.24666	-2.85958
ARHGAP1	ENSG00000175220.7	260	6.38502e-12	1.23568e-10	2.61754	2.68668	3.52898	3.11562	2.32421	1.44028
KLF10	ENSG00000155090.10	261	3.93147e-12	7.92221e-11	-3.51313	-1.13246	-1.74978	-2.13639	-4.46808	-1.93733
SNX14	ENSG00000135317.8	261	2.38523e-10	3.33314e-09	2.07413	3.93078	2.10969	3.45032	3.05564	2.22257
LYSMD1	ENSG00000163155.7	262	6.47989e-10	8.29861e-09	1.64834	2.54773	2.2834	1.18462	2.79941	2.37539
ACOX3	ENSG00000087008.11	267	1.92749e-13	4.85348e-12	2.08623	2.76029	1.93283	2.26017	1.86857	1.75187
COA4	ENSG00000181924.6	267	7.47067e-12	1.41943e-10	1.58585	1.69387	3.81124	2.53233	1.12675	-1.11822
ANXA2	ENSG00000182718.12	267	3.00372e-09	3.33351e-08	-2.56042	-2.36929	-1.08369	-1.93286	-1.38177	-3.05764
CDK2AP1	ENSG00000111328.2	268	5.69811e-13	1.34391e-11	2.21582	4.35203	3.41886	2.18661	2.15825	1.3314
INIP	ENSG00000148153.9	268	8.276e-10	1.04617e-08	1.86542	3.17863	3.03286	3.08799	1.84094	1.62315
MXRA8	ENSG00000162576.12	269	9.374e-12	1.75336e-10	2.27504	2.45444	2.5188	1.4196	-2.19539	2.26391
ANKRD17	ENSG00000132466.13	274	2.80581e-13	6.90937e-12	1.95982	3.54685	1.16765	1.71348	1.06512	1.0729
BTN3A2	ENSG00000186470.9	286	1.85885e-11	3.26962e-10	-1.19332	-1.40893	-3.65713	-1.38838	-2.46511	-1.79658
IDH3A	ENSG00000166411.9	289	1.87589e-09	2.16963e-08	2.15663	3.31944	2.65584	3.38829	1.55781	-1.43635
ZFAND1	ENSG00000104231.6	292	7.94691e-13	1.82744e-11	1.57704	4.2954	1.47721	1.93984	1.56861	-2.50187
MRPL9	ENSG00000143436.6	298	1.89239e-11	3.32487e-10	-3.76588	-1.74489	-1.7894	-2.48387	-1.45874	-2.18824
ISYNA1	ENSG00000105655.14	299	3.02404e-11	5.02517e-10	2.70969	2.35898	2.81467	2.12745	-1.4007	2.50603
TMCO4	ENSG00000162542.9	302	4.86871e-12	9.68601e-11	2.98479	3.19592	2.46592	2.8239	2.76968	2.01033
C4orf6	ENSG00000082929.4	303	1.02046e-09	1.25943e-08	1.9872	1.97186	2.12318	2.06472	2.03398	1.78156
PTPN13	ENSG00000163629.8	313	3.14783e-11	5.2198e-10	1.93186	1.70972	-1.64895	1.54224	1.34579	1.81903
MYO5C	ENSG00000128833.8	313	4.12606e-09	4.465e-08	1.91126	1.1885	2.09223	2.89525	2.43487	1.19922
SORBS2	ENSG00000154556.13	322	9.74752e-09	9.70223e-08	-1.77406	1.69669	-1.03178	-2.25206	2.27444	-3.15465
PBX1	ENSG00000185630.14	333	3.49836e-11	5.75225e-10	1.76426	3.30993	1.59826	2.46674	1.3196	4.6774
CYP4X1	ENSG00000186377.6	337	1.61243e-08	1.51889e-07	1.78323	1.61869	1.38077	1.76106	1.96391	1.69061
FAM213A	ENSG00000122378.9	338	8.42113e-12	1.58461e-10	1.30663	3.60901	1.65681	2.86859	2.08079	1.28076
CEP164	ENSG00000110274.10	340	2.74869e-10	3.80029e-09	1.86003	2.47905	2.024	2.24932	1.83203	1.16639
VAMP5	ENSG00000168899.4	341	4.70282e-12	9.37985e-11	2.78568	3.25329	2.59759	2.26657	2.16307	1.13734
OSBPL6	ENSG00000079156.12	341	9.74866e-12	1.8126e-10	1.79722	1.94688	1.46071	1.75176	1.41473	1.69028
SOCS7	ENSG00000174111.8	341	1.7672e-08	1.65372e-07	1.58801	1.69947	1.21974	1.6253	1.76755	1.30995
MPV17	ENSG00000115204.10	343	3.70657e-08	3.22188e-07	2.37891	2.07378	1.04275	2.11484	1.07298	-2.92513
RTCA	ENSG00000137996.8	344	5.42041e-09	5.70767e-08	1.4491	2.79653	2.19065	2.57971	1.92908	1.45958
ARFGAP3	ENSG00000242247.6	346	1.0314e-10	1.55826e-09	-3.25782	-1.41903	-2.54934	-2.04068	-1.19969	-1.97115
CACUL1	ENSG00000151893.10	350	2.96595e-11	4.94277e-10	1.32683	4.53189	2.50838	3.67465	2.82259	1.60156
S100A7	ENSG00000143556.4	355	1.16649e-08	1.13658e-07	2.84875	3.28827	3.11162	3.09218	3.28827	2.76656
CRIPT	ENSG00000119878.5	357	7.50431e-12	1.42236e-10	1.73225	2.96886	1.83214	1.61627	1.71168	1.38855
ABCC11	ENSG00000121270.11	357	1.57376e-08	1.48515e-07	1.25763	1.47378	1.76439	1.98065	1.48681	1.03143
KIAA1324L	ENSG00000164659.10	361	2.61607e-08	2.36187e-07	1.96449	1.48645	1.33505	1.59188	2.04027	1.84033
MTFR2	ENSG00000146410.7	365	5.46196e-10	7.07611e-09	2.63409	2.8673	2.92548	2.74991	1.92383	2.48654
ZNF185	ENSG00000147394.14	368	1.71398e-09	1.99565e-08	1.27302	2.02333	1.48092	1.19891	1.71516	1.90162
ZNF451	ENSG00000112200.12	368	1.14961e-08	1.12353e-07	2.03032	3.17011	1.25281	2.85091	1.09161	2.79902
FBXO36	ENSG00000153832.7	369	2.43524e-08	2.21137e-07	1.58033	1.64692	2.06008	2.72737	2.5339	1.74322
ACAT1	ENSG00000075239.9	371	2.48063e-08	2.24998e-07	1.67708	2.08996	2.68097	2.85637	-1.62742	-2.42373
ZFAND2A	ENSG00000178381.7	378	3.84383e-08	3.32997e-07	-2.25701	-1.75894	-1.95525	-1.15617	-5.88681	-2.54684
CNTNAP2	ENSG00000174469.13	381	7.96145e-08	6.39739e-07	1.07966	1.30743	1.3044	1.98546	1.63887	2.21059
SEC11C	ENSG00000166562.4	388	4.34283e-08	3.71899e-07	-3.00682	-2.58072	-1.40389	-1.10503	-3.07337	-1.85011
PSMA1	ENSG00000129084.13	391	3.56854e-09	3.90218e-08	1.41776	3.13688	2.70331	3.70235	1.1581	1.37118
LAGE3	ENSG00000196976.5	394	2.45738e-11	4.1904e-10	1.77961	2.83634	2.46184	1.70168	-1.47854	2.49946
TMEM237	ENSG00000155755.14	398	2.91139e-11	4.86903e-10	2.08189	2.82279	1.65293	1.66142	1.49398	1.85745
NAMPT	ENSG00000105835.7	398	5.28532e-10	6.89704e-09	-3.33951	-1.39303	-1.02011	-1.23409	-3.21304	-2.05911
GLDN	ENSG00000186417.9	399	5.67699e-08	4.72689e-07	1.75621	1.70056	1.15927	1.83397	1.73395	1.83397
EPO	ENSG00000130427.2	407	1.48008e-08	1.40693e-07	1.98426	1.98426	1.98426	1.98426	1.89438	1.81036
SESN1	ENSG00000080546.9	408	3.63773e-11	5.96136e-10	1.25519	2.4819	1.14896	2.15352	1.56875	1.36731
PROM2	ENSG00000155066.11	409	1.08107e-09	1.33131e-08	1.33779	1.94976	2.07263	1.5861	2.07493	1.0741
ZNF511	ENSG00000198546.10	411	6.62537e-08	5.43837e-07	1.16185	2.11087	2.2384	2.59052	2.01312	-1.12015
MBNL1	ENSG00000152601.13	412	8.89588e-10	1.11641e-08	-2.47142	1.24497	-1.17947	-1.21122	-1.79132	-1.12457
ST6GALNAC4	ENSG00000136840.14	416	9.69129e-10	1.20368e-08	2.26148	2.16475	2.13302	2.03873	1.51074	-1.11576
ANKRD10	ENSG00000088448.10	423	8.272e-08	6.61633e-07	2.38765	1.39962	1.90932	2.55822	4.31694	1.51047
CNOT7	ENSG00000198791.7	428	6.75347e-11	1.06348e-09	1.98798	4.04858	1.88127	2.95859	1.39844	1.59309
DAXX	ENSG00000204209.6	429	1.27203e-09	1.53953e-08	-3.26929	-1.37303	-1.58627	-1.39738	-2.58812	-2.56494
OAT	ENSG00000065154.7	433	4.75953e-09	5.07811e-08	2.12108	3.268	3.67022	2.65328	4.52277	3.02327
CD36	ENSG00000135218.13	436	5.31631e-08	4.46192e-07	2.05543	2.33487	1.90472	2.33773	1.70866	1.95696
DEFB1	ENSG00000164825.3	436	6.39528e-08	5.27999e-07	2.00891	2.15227	1.58938	1.67807	2.15227	2.07749
CT45A4	ENSG00000228836.4	440	3.8921e-08	3.36805e-07	1.41648	1.41648	1.41648	1.41648	1.41648	1.41648
C2CD2	ENSG00000157617.12	444	9.99068e-11	1.5138e-09	1.64049	2.0799	1.74807	1.41241	1.68419	1.28384
BLMH	ENSG00000108578.10	446	1.22737e-07	9.52002e-07	1.56859	1.96151	1.30563	2.13594	1.67816	1.12271
ZDHHC13	ENSG00000177054.9	447	1.70411e-07	1.27099e-06	1.85371	1.99655	1.76723	2.31754	2.73626	1.12561
SLC6A20	ENSG00000163817.11	450	6.67451e-08	5.47295e-07	1.63834	1.67503	1.67503	1.59358	1.67503	1.67503
TEX30	ENSG00000151287.12	452	1.25209e-10	1.85604e-09	1.30495	3.28543	2.69256	2.33772	1.80375	2.0577
UBL7	ENSG00000138629.11	453	1.40296e-07	1.0754e-06	1.24059	1.53056	2.04283	2.68517	1.82138	-1.31096
CTSB	ENSG00000164733.16	454	8.16491e-10	1.0346e-08	3.36343	3.73559	2.99594	2.37991	1.131	1.80915
ITGA2B	ENSG00000005961.13	456	1.05338e-07	8.27723e-07	1.87185	1.7093	1.8811	1.63275	1.90268	1.59114
TOX4	ENSG00000092203.9	465	2.86709e-09	3.20233e-08	-3.02168	-1.27554	-1.86699	-1.47902	-3.51523	-2.09049
LRRC16A	ENSG00000079691.15	472	2.77015e-09	3.10515e-08	3.38683	4.36924	2.6497	2.52366	3.2319	1.13094
CCDC73	ENSG00000186714.8	477	1.3434e-08	1.29352e-07	1.22314	1.43939	1.21929	1.3162	1.26853	1.14975
KIF9	ENSG00000088727.8	481	5.42733e-09	5.71111e-08	1.71819	2.07337	2.76813	2.57953	2.30035	-1.28696
POT1	ENSG00000128513.10	483	5.80471e-09	6.07146e-08	2.00109	2.19994	2.72177	1.99607	1.25206	1.585
RORB	ENSG00000198963.6	488	1.4296e-07	1.09275e-06	1.34126	1.34126	1.34126	1.26638	1.30299	1.33106
RUNX1	ENSG00000159216.14	491	7.45521e-09	7.59955e-08	-1.91286	-2.2018	-2.44415	-1.94545	-2.81361	-1.38817
TONSL	ENSG00000160949.12	492	4.07718e-10	5.43057e-09	1.19519	1.37185	1.09541	1.16571	1.10821	1.07759
MTL5	ENSG00000132749.6	495	5.97421e-08	4.94279e-07	1.78778	2.21843	2.35781	2.24212	1.43641	1.55055
RAPGEF4	ENSG00000091428.13	506	3.80555e-07	2.63774e-06	1.72721	1.51424	1.42872	1.78951	1.28221	1.60826
ASB18	ENSG00000182177.9	507	1.28509e-07	9.91853e-07	1.0917	1.0917	1.0917	1.0917	1.0917	1.0917
TRPA1	ENSG00000104321.6	510	2.05428e-07	1.50499e-06	1.90526	1.90526	1.90526	1.86504	1.75777	1.90526
CUTA	ENSG00000112514.11	515	4.17522e-07	2.86602e-06	-1.36264	-1.45484	-1.33879	-1.87499	-1.94232	-1.73315
SUPT20H	ENSG00000102710.15	518	6.4589e-10	8.27851e-09	1.80251	2.93337	1.45213	2.36516	2.82233	1.60424
MED13	ENSG00000108510.5	523	5.65769e-07	3.73761e-06	-1.82686	-1.27302	-2.27329	-1.09615	-3.06544	-1.72092
WNT5A	ENSG00000114251.9	527	6.38757e-07	4.17569e-06	1.11559	1.38149	1.40155	1.54796	1.58929	1.48845
IRX3	ENSG00000177508.11	532	7.27755e-07	4.68888e-06	-1.80969	-1.32643	-1.31413	-1.31671	-2.82633	-1.11206
PLEKHJ1	ENSG00000104886.5	536	6.16776e-07	4.04383e-06	1.36868	2.03278	1.33442	2.21504	2.00452	-1.06474
ZNF22	ENSG00000165512.4	539	2.3831e-07	1.72601e-06	1.72786	2.71871	1.35903	2.5313	1.38744	1.62953
GLRX	ENSG00000173221.9	540	2.36275e-08	2.15305e-07	-2.55106	-3.71152	-2.44727	-1.82232	-3.52031	-4.78645
TUBGCP4	ENSG00000137822.8	542	6.76928e-07	4.39947e-06	1.07522	1.90824	1.29572	2.54176	1.71717	2.02639
STAT3	ENSG00000168610.10	546	1.77626e-08	1.65922e-07	-2.82989	-1.90701	-1.20172	-1.28821	-2.88867	-1.58863
CHD9	ENSG00000177200.11	546	7.0346e-07	4.54922e-06	-1.55278	-1.47802	-2.11589	-2.92287	-2.7241	-2.84224
RNF141	ENSG00000110315.2	549	1.14636e-09	1.40483e-08	1.24855	2.96267	2.50703	1.42145	2.37813	-1.11306
SLC30A7	ENSG00000162695.7	555	1.24766e-09	1.51472e-08	1.86996	3.17252	1.45991	2.24913	1.48389	1.05717
MT2A	ENSG00000125148.6	556	1.25968e-09	1.52813e-08	1.00931	-2.61087	-1.90486	1.03437	-2.66513	-1.01388
FAM174B	ENSG00000185442.8	560	1.6663e-07	1.24729e-06	1.90685	2.37793	1.91456	2.45705	1.05093	1.52686
IGSF3	ENSG00000143061.13	564	1.43946e-09	1.70781e-08	1.40464	1.87112	1.36465	1.37702	1.57041	1.23095
ACN9	ENSG00000196636.7	566	1.56959e-09	1.84678e-08	1.5395	2.65524	2.11614	1.21282	1.96919	-2.15583
RNF213	ENSG00000173821.15	570	9.31631e-07	5.86396e-06	-1.46105	-1.86425	-2.10994	-1.06845	-2.50222	-1.65193
ARHGEF10	ENSG00000104728.11	582	5.24548e-07	3.50978e-06	2.36954	2.25106	1.97197	1.27968	2.26591	2.47868
EXTL2	ENSG00000162694.9	585	1.99022e-09	2.29507e-08	1.4797	2.33541	1.03998	1.83179	1.26705	1.42251
NCAM2	ENSG00000154654.10	589	1.05345e-06	6.5394e-06	1.09625	1.05581	1.31927	1.31927	-3.04365	1.31927
STK11IP	ENSG00000144589.16	603	2.58275e-09	2.91178e-08	1.07619	1.99913	1.44559	1.63723	1.79513	1.22872
TPD52L1	ENSG00000111907.16	617	4.26436e-09	4.59558e-08	2.88396	3.50087	1.75481	1.94274	2.62952	1.52044
GNG12	ENSG00000172380.5	620	6.52224e-07	4.25128e-06	-2.24961	-2.33224	-1.37066	-1.93339	-2.70644	-3.74733
ANKRD37	ENSG00000186352.4	625	7.46935e-08	6.06429e-07	-2.87808	-1.04528	-1.09311	-1.03365	-3.08506	-1.80683
CPA4	ENSG00000128510.6	628	1.2192e-06	7.45293e-06	1.23772	1.73935	1.68813	1.33805	1.71498	1.397
FRMD4A	ENSG00000151474.15	638	6.15803e-09	6.40247e-08	1.88117	2.39547	1.88532	1.92295	1.62537	2.0226
TMEM54	ENSG00000121900.14	651	1.5362e-07	1.16383e-06	1.26117	1.67476	2.5417	1.28175	2.40548	1.50742
ERCC1	ENSG00000012061.11	652	3.31886e-06	1.83641e-05	1.16558	2.23795	2.22135	1.0828	3.09121	-1.48957
PRCC	ENSG00000143294.10	656	1.55258e-07	1.17511e-06	-2.54751	-1.10464	-2.32177	-1.60903	-2.48136	-2.76828
PDS5B	ENSG00000083642.14	669	2.00031e-07	1.46987e-06	1.22316	1.06883	2.45441	1.64986	1.86828	1.37123
CASP14	ENSG00000105141.4	689	2.56829e-06	1.45667e-05	1.47011	1.21372	1.50349	1.07889	1.50349	1.2803
SSR1	ENSG00000124783.8	693	5.42548e-06	2.84883e-05	-1.45928	-1.14472	-1.77736	-1.0919	-2.32615	-1.51777
CDV3	ENSG00000091527.11	728	5.08077e-07	3.41418e-06	-2.76471	1.70009	-1.7631	1.11699	-1.3014	-2.08189
INHA	ENSG00000123999.4	765	1.01626e-05	4.94748e-05	1.13751	1.09216	1.15987	1.162	1.22563	1.21253
CPB1	ENSG00000153002.7	770	2.15704e-05	9.70639e-05	2.2001	-3.933	2.13562	1.92402	2.06784	-6.1799
SF3B5	ENSG00000169976.5	784	4.61266e-08	3.92427e-07	1.4461	3.65809	1.21634	2.29342	2.28319	1.02504
ARHGAP8	ENSG00000241484.5	787	5.03576e-07	3.38976e-06	2.44567	2.76035	2.58497	2.2138	2.0486	1.2764
ASNA1	ENSG00000198356.7	796	5.34093e-08	4.47568e-07	1.13457	2.4909	2.1996	1.82448	1.43568	-1.14348
SKP2	ENSG00000145604.11	829	1.2809e-06	7.78752e-06	1.70702	1.98782	1.25059	1.78847	1.74556	1.47263
RBM5	ENSG00000003756.12	838	3.81962e-05	0.000161077	-1.52901	-1.26092	-1.81612	-1.04498	-1.84585	-2.99263
CSNK1G1	ENSG00000169118.11	845	2.1529e-05	9.69051e-05	1.42269	1.31851	1.08048	1.58032	1.94044	1.53605
MRPS2	ENSG00000122140.6	852	1.12949e-07	8.82649e-07	1.04412	2.00061	1.19271	1.30682	1.78912	-1.18339
MAD2L1	ENSG00000164109.9	860	1.23352e-07	9.56303e-07	1.66548	2.66031	1.09105	1.90849	1.23787	1.74204
TGOLN2	ENSG00000152291.9	904	2.629e-06	1.48786e-05	1.33634	1.40938	1.85431	1.24135	1.22114	1.33712
COLGALT1	ENSG00000130309.6	912	2.94566e-06	1.65213e-05	1.87701	2.08151	2.80891	2.31333	1.50373	1.01584
CKAP5	ENSG00000175216.10	915	1.14746e-05	5.53451e-05	1.40773	2.47589	2.30236	2.54968	1.81577	1.49061
C4orf33	ENSG00000151470.8	939	2.58803e-07	1.861e-06	1.59506	2.32674	1.232	1.30945	1.42607	1.97386
PPT1	ENSG00000131238.12	948	8.76571e-05	0.000335543	1.86222	-1.81511	2.33824	1.49508	-1.8736	-2.70474
TNFAIP1	ENSG00000109079.5	953	2.95917e-07	2.10139e-06	1.02049	2.07692	-1.24616	1.5092	1.1689	1.13396
PMPCB	ENSG00000105819.9	962	4.87141e-05	0.000199149	1.49433	1.87881	1.64096	2.49637	1.56187	-1.75532
ABCC6	ENSG00000091262.10	964	8.23368e-05	0.000317353	1.09948	1.11894	1.11576	1.27568	1.32223	1.10675
HLA-DPA1	ENSG00000231389.3	965	7.03562e-06	3.58592e-05	-2.60159	-1.52843	-2.78594	-1.42139	-3.26159	-1.24477
EFHD1	ENSG00000115468.7	969	2.3541e-06	1.342e-05	-1.40686	2.3026	2.25665	1.75859	-1.72095	2.29092
MACROD2	ENSG00000172264.12	979	6.47697e-07	4.2253e-06	1.30251	1.5013	1.02189	1.25911	1.40358	1.08569
AC007390.5	ENSG00000218739.5	986	4.95929e-07	3.34405e-06	1.6929	2.74175	1.53158	2.0425	1.77424	2.29717
POLR2B	ENSG00000047315.10	1002	4.77269e-07	3.23207e-06	1.62585	2.82455	1.08187	2.19567	1.52873	1.73934
ODAM	ENSG00000109205.12	1021	3.47774e-05	0.000148421	1.36633	1.29489	1.36633	1.2508	1.36633	1.36633
ATF6	ENSG00000118217.5	1141	2.92487e-05	0.000127328	-1.78424	-1.3151	-1.19397	-1.37135	-1.90798	-1.13989
PDHA1	ENSG00000131828.9	1170	7.46832e-05	0.000291736	-1.33867	2.51773	-1.66825	-1.24722	-2.57791	-2.61303
FBLIM1	ENSG00000162458.8	1188	1.84164e-06	1.07816e-05	1.08493	1.70731	1.21983	1.19951	1.59329	1.27056
TFPI	ENSG00000003436.10	1214	2.16182e-06	1.24281e-05	1.36602	1.75719	-1.87903	1.47081	-3.14489	1.51163
USP36	ENSG00000055483.15	1236	5.82954e-05	0.000233914	-2.05183	-1.23391	-1.38272	-1.07802	-1.46113	-1.76385
RFX2	ENSG00000087903.8	1291	0.000302032	0.000991994	1.85373	1.36646	1.77744	2.1468	1.81745	1.75239
TXNIP	ENSG00000117289.7	1321	0.000113497	0.000421256	-2.53309	1.88826	-2.18236	-1.67967	-1.3269	1.01316
FBXO9	ENSG00000112146.12	1349	5.40235e-06	2.8405e-05	1.41359	2.54975	1.00977	1.66362	1.4409	1.14091
CST4	ENSG00000101441.4	1404	0.000176207	0.000620014	1.0546	1.0546	1.0546	1.0546	1.0546	1.0546
AASDH	ENSG00000157426.9	1483	0.000348809	0.00112693	1.67105	1.3701	1.04823	1.73889	1.86664	1.18095
ISG20	ENSG00000172183.10	1511	0.000763955	0.00223624	1.56772	1.44296	-1.10834	2.30541	1.10588	-1.24721
PLCD1	ENSG00000187091.9	1552	0.000176773	0.000621447	1.23187	1.32205	1.18478	1.17305	1.17795	1.27138
HILPDA	ENSG00000135245.9	1638	5.42734e-05	0.000219409	-1.43458	2.68309	1.68452	1.75978	-1.20992	-2.22995
HACL1	ENSG00000131373.10	1723	0.000154547	0.000553644	1.10513	1.82051	1.0962	1.24577	1.44432	-2.24485

## Sheet: C2
# Supplementary table 4.2. DEGs of lncRNA subtypes (C2)
Name	Ensembl_ID	Top	p.value	FDR	logFC.1	logFC.3	logFC.4	logFC.5	logFC.6	logFC.7
GSTP1	ENSG00000084207.11	1	2.4253e-32	1.58019e-29	7.85103	9.34285	4.29593	2.96563	5.60855	8.7342
S100A16	ENSG00000188643.6	1	2.7821e-28	1.17577e-25	-5.58806	-5.29924	-7.1502	-4.82425	-4.29778	-7.25225
MUCL1	ENSG00000172551.6	1	1.16067e-25	3.70396e-23	4.91503	9.22785	5.63008	9.05971	9.1134	9.15446
ALCAM	ENSG00000170017.8	2	3.0488e-25	9.1681e-23	1.67004	3.39817	4.90135	4.03068	5.66568	-1.84339
TSPAN8	ENSG00000127324.4	2	3.49442e-25	1.01189e-22	7.55196	7.55196	7.12608	7.38842	7.55196	7.55196
ADD3	ENSG00000148700.9	3	1.33151e-26	4.62684e-24	5.2892	6.74994	3.32791	5.63909	5.7166	6.73257
S100A6	ENSG00000197956.5	3	5.08515e-24	1.1044e-21	-4.49147	-5.73486	-7.74898	-7.00905	1.20135	-3.80592
MGP	ENSG00000111341.5	4	1.15929e-38	3.02131e-35	-12.7635	-10.6943	-1.02864	-7.40245	-8.90429	1.39122
CXADR	ENSG00000154639.14	5	2.70844e-28	1.17577e-25	6.99761	6.4574	3.84238	3.75174	6.96045	1.73346
SLPI	ENSG00000124107.5	6	5.73416e-21	8.22615e-19	4.96436	5.54732	1.5433	2.33896	7.22232	2.01144
SDR16C5	ENSG00000170786.8	7	1.10226e-20	1.49878e-18	5.17464	4.51347	5.00554	4.38759	5.54941	5.54941
TMC5	ENSG00000103534.12	7	5.60977e-17	4.565e-15	1.9303	3.44308	1.54239	5.3169	4.89758	1.25344
HOXA10	ENSG00000253293.3	8	4.05969e-19	4.63368e-17	5.36026	5.4095	5.40019	4.59979	5.55749	5.46577
NKX3-1	ENSG00000167034.9	8	2.44174e-16	1.69696e-14	5.07148	5.19564	2.35564	5.20346	5.09507	3.61424
BHLHE40	ENSG00000134107.4	10	1.58033e-21	2.57413e-19	1.01599	1.28208	4.76598	2.03927	1.47051	2.84228
ID4	ENSG00000172201.6	10	9.45098e-19	1.01223e-16	4.76237	4.64705	4.39582	2.90115	4.85811	4.84351
ZNF217	ENSG00000171940.9	11	7.15946e-16	4.53249e-14	3.13662	4.3634	2.12621	4.49945	2.77033	4.94729
SERPINB6	ENSG00000124570.13	12	2.01628e-21	3.15286e-19	-2.82655	-1.95381	-2.75479	-1.05573	-4.26606	-6.11927
TOX3	ENSG00000103460.12	12	2.73684e-16	1.88529e-14	4.34498	4.48393	2.24429	4.52189	4.92847	2.17841
LGALS3	ENSG00000131981.11	13	3.39216e-21	5.14983e-19	4.39269	3.65275	2.59379	1.64591	1.14248	6.43801
PVRL4	ENSG00000143217.7	13	6.93625e-18	6.45608e-16	1.25093	3.54872	1.45197	1.11145	5.74078	3.16101
RASGEF1B	ENSG00000138670.12	15	7.86707e-25	2.12099e-22	4.3085	5.2683	1.81118	1.69208	3.80749	5.04269
ATXN1	ENSG00000124788.13	15	1.46587e-14	7.44213e-13	3.95634	4.73057	2.45046	4.55868	3.31822	4.42163
LMO4	ENSG00000143013.8	16	2.33567e-19	2.70539e-17	3.7187	4.13702	4.1501	2.07525	2.65115	1.76002
S100A14	ENSG00000189334.4	17	6.45806e-20	7.95155e-18	-2.64996	-2.9816	-5.09782	-2.47857	-4.17217	-6.68681
HLA-A	ENSG00000206503.7	17	2.84852e-19	3.27517e-17	2.90169	-2.143	-5.55323	-1.66608	-2.62056	-1.3803
TFAP2B	ENSG00000008196.8	17	4.87203e-17	4.0309e-15	-2.43774	2.96136	2.96136	2.62891	2.96136	2.782
TSC22D3	ENSG00000157514.12	18	2.21276e-15	1.31562e-13	3.32934	4.51941	4.89419	4.94957	2.2432	3.56743
DEGS1	ENSG00000143753.8	20	8.13568e-22	1.36793e-19	4.33557	6.23994	5.70724	4.09508	1.21291	3.66811
C1orf198	ENSG00000119280.12	21	8.62699e-22	1.43511e-19	2.00837	5.87178	2.67021	2.08572	3.02307	2.52108
KLHL24	ENSG00000114796.11	23	4.91028e-21	7.24359e-19	3.62691	5.41958	2.17314	3.44906	2.39068	3.28198
SELENBP1	ENSG00000143416.16	23	2.09201e-14	1.03195e-12	3.72145	4.61062	4.24745	5.15261	2.43642	5.52068
ODF2L	ENSG00000122417.11	24	2.56544e-16	1.77504e-14	2.05588	4.61961	1.79211	3.22641	5.06735	2.42717
TRIM36	ENSG00000152503.5	24	2.5867e-13	1.05061e-11	3.47153	3.18377	3.50351	3.83532	2.02208	2.90191
VSIG10	ENSG00000176834.9	26	1.62329e-30	8.21958e-28	-5.35885	-1.28517	-1.52782	-1.00498	-1.56938	-4.90406
CCND1	ENSG00000110092.3	26	1.06034e-17	9.58412e-16	-2.02723	-4.60877	-3.96554	-2.34995	-2.64967	-2.72474
CREB3L4	ENSG00000143578.11	26	1.96491e-14	9.81639e-13	4.44847	3.20176	3.42209	4.89477	3.88752	4.0477
SORD	ENSG00000140263.9	27	1.102e-20	1.49878e-18	5.00932	4.82127	3.89508	4.28579	2.70015	2.276
FABP7	ENSG00000164434.7	27	1.7562e-16	1.27138e-14	6.52577	6.52462	6.55531	4.93051	6.57005	6.57005
FOS	ENSG00000170345.5	28	2.30952e-17	2.01754e-15	3.00951	1.24565	5.89453	2.1747	1.3379	7.43563
S100A13	ENSG00000189171.9	28	6.92134e-16	4.41751e-14	-1.48753	-3.14163	-3.50417	-3.31318	-5.1709	-3.94006
LRRC31	ENSG00000114248.5	28	1.95581e-13	8.09075e-12	3.8267	3.96179	3.69294	3.96438	3.96438	2.82181
TIPARP	ENSG00000163659.8	29	4.56458e-16	3.01166e-14	4.20116	1.8545	3.45592	4.61569	1.62106	1.43824
TMEM41A	ENSG00000163900.6	31	3.47164e-16	2.36026e-14	4.3407	4.52153	1.54435	4.30621	1.96348	3.11753
SSFA2	ENSG00000138434.12	32	1.00383e-18	1.0606e-16	4.63839	5.4882	4.66578	4.0668	4.94097	1.67864
CLDN1	ENSG00000163347.5	34	3.87603e-13	1.50396e-11	4.44373	4.44198	4.38511	4.29579	4.14474	3.94289
RGS2	ENSG00000116741.6	35	1.05708e-16	7.94689e-15	5.69158	5.73253	2.71681	2.66142	1.72388	5.66822
SRPR	ENSG00000182934.7	35	3.19829e-12	1.0333e-10	2.1974	3.8223	3.5022	3.67527	2.24397	1.36713
BTG3	ENSG00000154640.10	36	4.02402e-16	2.68905e-14	4.09045	3.83508	2.19262	1.68572	3.97658	2.41269
B3GNT5	ENSG00000176597.7	37	1.23726e-14	6.38516e-13	3.35965	3.92659	1.09218	2.18765	3.95397	3.85757
PIK3CB	ENSG00000051382.4	37	4.40129e-14	2.06676e-12	2.82887	4.00313	2.31669	3.84742	3.4533	1.44635
CD82	ENSG00000085117.7	38	4.12414e-17	3.46716e-15	3.40016	5.31815	4.86364	3.44846	4.36802	3.7043
WEE1	ENSG00000166483.6	39	6.7914e-12	2.0485e-10	1.1364	2.62454	2.03971	4.10705	1.99973	3.38842
BACH1	ENSG00000156273.11	41	1.66474e-16	1.21602e-14	2.88362	4.23659	1.40217	3.55294	2.89946	2.53907
C3orf58	ENSG00000181744.4	41	7.90822e-14	3.53317e-12	2.45047	3.16341	2.79297	2.24137	4.67312	2.67046
ATF3	ENSG00000162772.12	42	5.91522e-25	1.62274e-22	5.30642	4.07177	3.13038	2.91094	1.42863	2.86707
UAP1	ENSG00000117143.9	43	6.19385e-17	4.96683e-15	4.51359	5.15692	2.18436	3.33934	1.52873	4.91679
SGK1	ENSG00000118515.7	44	6.70149e-15	3.66403e-13	4.2971	4.31474	1.70251	1.81494	1.44077	4.5849
IGF1R	ENSG00000140443.9	47	3.09929e-14	1.49579e-12	-1.02708	-3.92055	-1.30378	-1.66812	-4.39567	-5.14114
GPRC5A	ENSG00000013588.5	48	2.61497e-14	1.27782e-12	1.94057	2.06217	2.55401	1.77109	-1.03164	5.79396
IQCB1	ENSG00000173226.12	48	3.3711e-11	8.69866e-10	2.87425	3.09193	2.35808	3.98082	2.5785	2.57898
MCL1	ENSG00000143384.8	52	3.35066e-24	7.37947e-22	4.32523	2.08727	1.40637	1.90682	1.27509	2.52999
CAPG	ENSG00000042493.11	52	6.96489e-13	2.57471e-11	1.18028	-1.79322	1.96317	-1.11216	-4.62184	2.81425
FKBP5	ENSG00000096060.10	52	2.24184e-12	7.50655e-11	3.46483	3.67544	2.51568	3.41933	3.32233	3.41984
LIPH	ENSG00000163898.5	54	1.03167e-17	9.37917e-16	4.21486	3.39776	2.1568	3.447	2.00548	1.95561
ST6GAL1	ENSG00000073849.10	56	5.28897e-13	2.00737e-11	3.65572	4.24132	3.36236	3.77954	3.51456	1.50594
HSD17B12	ENSG00000149084.7	58	1.80753e-13	7.55731e-12	1.02685	1.80915	3.76774	1.56652	1.1778	2.32307
PHLDB2	ENSG00000144824.15	59	1.48139e-12	5.13625e-11	3.69245	3.2844	2.82244	3.21487	4.17412	-1.15682
GALNT3	ENSG00000115339.9	60	1.02618e-15	6.39296e-14	3.06778	4.46678	2.22202	2.7505	3.2182	3.93531
CEP70	ENSG00000114107.4	60	1.88648e-10	4.09139e-09	1.77357	3.0508	2.89516	3.78781	1.96337	1.2383
DUSP6	ENSG00000139318.7	61	3.37979e-13	1.32788e-11	2.51551	3.66706	-2.36005	3.62268	3.07264	4.82676
FURIN	ENSG00000140564.6	61	6.11292e-13	2.28133e-11	2.15929	2.64963	2.76261	2.22008	2.63522	2.0652
GPR160	ENSG00000173890.12	61	1.70405e-12	5.81796e-11	1.57598	4.04187	3.15232	3.7869	1.68688	2.72902
KRT23	ENSG00000108244.12	62	3.48214e-13	1.36467e-11	4.12576	3.86451	3.55284	1.81382	3.7941	4.29417
LDLR	ENSG00000130164.7	62	2.46597e-10	5.25345e-09	3.03643	2.32701	1.13061	3.99787	3.654	2.60728
PNPO	ENSG00000108439.5	63	2.57994e-12	8.51108e-11	-1.66624	-2.56791	1.35058	-1.27331	-3.90794	-3.31773
DBI	ENSG00000155368.12	64	1.97725e-15	1.18461e-13	1.17164	6.12472	2.25303	2.32162	1.38482	2.2993
TACSTD2	ENSG00000184292.5	64	8.12371e-13	2.968e-11	3.52225	3.50436	4.29585	1.2304	2.25723	2.6091
ENPP3	ENSG00000154269.10	64	3.98735e-11	1.01548e-09	1.72447	3.19186	1.59172	3.10336	3.23158	3.20321
PAX6	ENSG00000007372.16	65	1.73855e-10	3.80221e-09	2.19042	3.02189	1.72141	3.11388	3.12795	2.93465
FNIP1	ENSG00000217128.7	67	6.28741e-13	2.34086e-11	-2.12341	-3.3169	-1.45719	-1.12422	-1.60763	-3.45965
ALDH9A1	ENSG00000143149.8	68	5.74095e-14	2.65595e-12	2.46698	4.64526	3.70713	3.70552	2.18494	2.46042
ATP13A4	ENSG00000127249.10	69	4.6535e-12	1.44954e-10	3.48947	3.57385	3.33166	3.23468	3.57385	3.44937
CBLB	ENSG00000114423.14	70	3.10622e-13	1.22967e-11	3.85302	3.91981	1.97884	3.48251	2.01228	3.17095
BLZF1	ENSG00000117475.9	72	1.94925e-14	9.76937e-13	4.0903	3.84299	3.76505	3.63475	2.53254	3.66937
ACSL1	ENSG00000151726.9	72	2.17945e-12	7.36071e-11	1.97986	3.75426	2.94176	1.5297	3.74355	-1.11017
ATP11B	ENSG00000058063.11	72	2.39219e-12	7.95886e-11	3.13166	3.45565	3.45675	1.73823	3.72442	2.26595
AK2	ENSG00000004455.12	73	2.49711e-12	8.27274e-11	2.18297	3.75156	4.04425	2.61871	2.49106	1.05562
CHKA	ENSG00000110721.7	73	2.87547e-12	9.40663e-11	3.29274	3.91664	3.35116	3.40108	1.23976	3.44778
GLYATL2	ENSG00000156689.2	74	5.97215e-12	1.82396e-10	4.53233	4.61773	4.63992	3.28408	4.79117	4.79117
EFCAB4A	ENSG00000177685.12	76	2.06605e-11	5.59911e-10	1.15811	2.73302	2.38812	1.90789	2.88247	1.92282
TP53BP2	ENSG00000143514.12	78	1.20957e-12	4.25034e-11	3.60803	3.98115	2.16262	1.95462	4.43053	3.55053
RPL22L1	ENSG00000163584.13	80	1.37679e-11	3.85132e-10	1.85508	2.97502	4.25693	1.25808	1.71145	-1.8131
COX20	ENSG00000203667.5	81	1.99821e-14	9.95095e-13	2.18694	4.49965	3.06169	1.18714	1.18385	1.09079
DESI2	ENSG00000121644.14	82	2.0714e-14	1.02688e-12	1.82202	3.58686	1.41448	1.61254	2.25674	2.40855
PMEPA1	ENSG00000124225.11	82	3.58408e-12	1.15081e-10	2.90852	2.43327	1.3118	1.37032	2.38964	3.5567
FKBP9	ENSG00000122642.6	84	5.589e-20	6.96911e-18	-4.43485	-2.28454	-1.41263	-1.65016	-1.46191	-2.76245
SIPA1L2	ENSG00000116991.6	86	2.24311e-11	5.99582e-10	1.92131	2.52054	1.45129	1.09482	2.89544	2.89894
PPP1R1B	ENSG00000131771.9	88	7.33583e-15	3.95553e-13	-4.59027	4.07113	-3.80855	2.3447	3.7636	3.8815
MPC2	ENSG00000143158.6	89	1.33387e-19	1.56825e-17	4.28079	1.47405	3.59278	2.31986	1.75568	1.6999
AKT1	ENSG00000142208.11	89	6.03339e-10	1.16907e-08	1.30096	3.0415	2.46079	2.9522	1.74839	1.68322
CEACAM6	ENSG00000086548.8	92	5.14161e-11	1.28025e-09	2.27878	1.82777	-4.51866	1.71518	2.8194	3.41007
ADM	ENSG00000148926.5	92	7.49466e-11	1.78922e-09	3.54384	3.48273	2.85707	2.02894	3.86925	1.98713
CSRNP1	ENSG00000144655.10	92	1.42049e-09	2.5028e-08	2.59741	1.70779	1.91464	2.84418	1.74125	1.85897
CROT	ENSG00000005469.7	93	1.12235e-11	3.22023e-10	3.31397	2.19491	2.84396	3.02497	-1.12283	3.44247
ZFP36	ENSG00000128016.4	96	9.74669e-19	1.0368e-16	4.697	1.52054	2.5266	2.22704	2.17757	4.44783
RNF168	ENSG00000163961.4	97	6.59596e-12	1.99886e-10	2.69815	3.89348	2.84357	3.31142	2.44713	2.47043
FABP5	ENSG00000164687.6	98	6.65304e-14	3.03305e-12	3.7231	4.93711	3.70475	2.23853	2.95938	1.22002
HSPA1A	ENSG00000204389.8	99	1.96438e-18	2.00765e-16	4.72874	2.54533	-1.47315	3.54102	-1.99813	4.73727
SHOX2	ENSG00000168779.15	100	3.83521e-11	9.81526e-10	2.61397	2.61397	2.61397	2.36118	2.61397	2.59755
LBR	ENSG00000143815.10	102	9.01428e-14	4.01585e-12	2.914	4.30588	1.11368	3.15691	3.44851	3.08991
TRPV6	ENSG00000165125.13	102	1.20968e-10	2.75339e-09	1.33885	3.10035	2.98816	2.07869	3.09143	3.0058
NCOA7	ENSG00000111912.14	103	2.15991e-15	1.2891e-13	5.47107	5.48831	1.11148	3.11495	5.06462	4.32228
C10orf10	ENSG00000165507.8	104	2.31198e-11	6.15885e-10	1.72638	3.69434	3.55302	1.82519	3.08149	4.08946
RAB30	ENSG00000137502.5	104	4.65987e-09	7.27671e-08	3.27625	2.02323	3.10516	3.38398	-1.23736	2.36232
SOX13	ENSG00000143842.10	105	2.32011e-11	6.16998e-10	1.13798	1.96322	1.25683	1.52476	1.70485	2.21162
PLAU	ENSG00000122861.11	105	2.05228e-09	3.48086e-08	3.80176	3.45824	1.42293	3.7378	3.85844	3.66018
HGD	ENSG00000113924.7	106	3.92165e-09	6.27023e-08	1.16449	2.54294	2.0727	3.38854	3.39737	-1.01248
NPNT	ENSG00000168743.8	108	3.10421e-10	6.46345e-09	-1.17837	1.65163	2.61601	2.51864	3.16306	2.78064
SLC25A37	ENSG00000147454.9	109	1.75925e-13	7.37519e-12	1.86487	4.50694	2.51061	1.51382	4.04925	3.64093
GPX1	ENSG00000233276.2	109	3.03122e-11	7.88672e-10	1.01429	-1.36388	-1.56651	-2.48948	-3.76037	-4.41462
DNAJA4	ENSG00000140403.8	111	9.80079e-09	1.41119e-07	1.85989	1.01259	2.49812	3.53364	-1.73172	2.23128
RGS1	ENSG00000090104.7	112	1.51706e-11	4.21355e-10	4.1585	4.12328	2.28604	3.25968	1.25186	4.14262
CXCL17	ENSG00000189377.4	112	2.1093e-10	4.53688e-09	3.83892	3.00201	-2.60862	2.34649	3.9087	3.97145
FXYD5	ENSG00000089327.10	114	3.88263e-10	7.9053e-09	2.20634	3.14284	3.7553	-1.50602	2.15655	2.41143
TMX4	ENSG00000125827.4	115	2.61784e-13	1.05776e-11	1.62054	3.41715	1.84041	2.47649	2.8814	1.25143
BCL9	ENSG00000116128.5	118	3.16844e-10	6.57966e-09	1.74773	1.95469	1.09472	2.13571	1.95212	2.34684
PLK3	ENSG00000173846.8	119	2.4735e-09	4.09292e-08	2.68875	3.37531	2.84522	3.27714	2.35684	3.41905
TMSB15A	ENSG00000158164.6	120	1.846e-10	4.00915e-09	3.0121	3.77005	3.77005	3.23178	3.77005	3.62466
MLLT3	ENSG00000171843.11	121	5.69991e-10	1.11273e-08	-1.52551	2.50542	3.01806	1.81808	2.74702	1.018
ATP2C1	ENSG00000017260.15	123	3.83163e-13	1.49043e-11	1.95925	3.76328	2.89574	2.89628	2.96126	2.74937
TNFSF10	ENSG00000121858.6	127	7.83556e-10	1.47798e-08	-1.77517	3.4544	3.79127	3.75438	2.0751	4.94913
DNAJB4	ENSG00000162616.8	130	5.7521e-13	2.15181e-11	1.92866	4.23147	1.21522	1.78557	3.00972	2.54415
HIST2H2AA4	ENSG00000203812.2	130	8.61064e-10	1.60866e-08	3.20162	3.79266	3.91278	2.47061	-1.32673	2.06813
A2ML1	ENSG00000166535.15	130	5.73263e-10	1.11772e-08	2.76594	2.92471	2.83251	1.92339	2.92471	2.70608
JMJD1C	ENSG00000171988.13	133	3.74749e-10	7.6701e-09	3.07328	3.34832	2.52733	3.40441	1.14431	2.95042
MALL	ENSG00000144063.3	133	6.72547e-10	1.29197e-08	2.44572	2.58908	2.35834	1.02676	2.58908	2.55188
HIST2H2AA3	ENSG00000183558.5	135	1.10323e-09	2.01062e-08	2.30319	2.88127	2.90587	2.07248	-1.2935	2.09689
PCMTD1	ENSG00000168300.9	136	9.19716e-13	3.30612e-11	1.60253	4.26681	3.11643	1.44536	1.75865	1.2664
HOPX	ENSG00000171476.17	137	1.08841e-08	1.54863e-07	3.08496	2.9758	2.93966	3.06832	1.79508	3.08496
SIVA1	ENSG00000184990.8	138	1.39651e-09	2.47307e-08	2.66708	3.81499	3.765	3.28156	2.18254	3.3188
CHMP4A	ENSG00000254505.4	139	1.78137e-16	1.28366e-14	-3.94648	-1.65635	-2.21382	-2.31215	-4.29167	-2.77401
FGFR2	ENSG00000066468.16	140	7.77632e-10	1.46858e-08	2.55743	2.48198	2.57958	2.18528	2.59153	2.57241
SCNM1	ENSG00000163156.7	144	3.39731e-16	2.31981e-14	4.32642	3.73584	2.29481	2.14069	2.41713	2.22887
GTF3A	ENSG00000122034.8	146	2.8981e-10	6.05042e-09	-1.65184	-1.10286	-1.48039	-1.39021	-2.2031	-4.14731
HSPA1B	ENSG00000204388.5	147	1.583e-11	4.37339e-10	3.51522	1.46828	-1.14106	1.82503	-2.59921	4.15618
HOXA9	ENSG00000078399.11	147	1.00974e-09	1.84886e-08	2.96453	2.99328	2.99328	2.39903	2.99328	2.99328
TMEM150C	ENSG00000249242.3	148	1.51872e-08	2.09235e-07	1.9511	2.27534	-1.48324	2.4927	1.79157	2.59672
CD83	ENSG00000112149.5	153	1.75469e-10	3.83214e-09	3.99602	3.83953	2.59322	3.18847	1.07885	3.99602
EPHX1	ENSG00000143819.8	156	2.59326e-09	4.273e-08	2.06373	2.13061	2.29986	1.5356	1.30775	1.33756
PHF20L1	ENSG00000129292.16	159	4.92447e-10	9.80941e-09	-1.94779	1.15482	-2.29881	-2.27395	-2.29553	-4.09979
PALMD	ENSG00000099260.6	159	3.00482e-09	4.88932e-08	-1.17754	2.86514	2.54284	1.72189	2.86514	2.58695
SWAP70	ENSG00000133789.10	160	1.11954e-15	6.89223e-14	4.09721	3.68105	2.02307	2.19997	2.64178	4.05853
LY6E	ENSG00000160932.6	160	7.57676e-14	3.39713e-12	-3.32266	-1.85719	-1.47724	-3.11239	-1.81337	-2.9713
C1orf21	ENSG00000116667.8	160	2.88708e-09	4.71737e-08	2.95813	2.69644	3.31215	2.78285	2.56937	3.09209
CLGN	ENSG00000153132.8	160	3.96378e-09	6.30535e-08	2.31172	2.88719	2.03844	2.48547	2.90932	2.81077
S100A8	ENSG00000143546.5	165	5.74267e-09	8.77793e-08	-1.74534	3.95105	1.60064	2.44804	3.98377	3.51228
ZCCHC11	ENSG00000134744.9	167	5.763e-10	1.12224e-08	2.95542	3.42887	2.20112	2.9184	2.76508	4.12914
MYBPC1	ENSG00000196091.8	167	2.63359e-09	4.33033e-08	3.08077	3.07358	2.91422	2.51437	3.08077	3.08077
PMAIP1	ENSG00000141682.11	169	3.78701e-14	1.80541e-12	4.39912	-1.20008	3.544	1.85265	-2.0896	2.32749
NUDT8	ENSG00000167799.5	170	1.02826e-08	1.47243e-07	1.55142	2.52294	2.18049	2.22369	2.57203	2.0611
JUNB	ENSG00000171223.4	173	1.37755e-13	5.85347e-12	3.24093	2.74969	2.78674	2.6583	2.40707	3.89427
BCL6	ENSG00000113916.13	175	7.57744e-15	4.07177e-13	3.81472	3.07532	2.44728	2.4264	1.13491	3.98064
SLC12A1	ENSG00000074803.13	175	3.13104e-08	3.94129e-07	1.32771	2.2054	1.28228	2.20154	2.2054	2.2054
HOXA7	ENSG00000122592.6	179	1.25649e-08	1.75739e-07	2.68478	2.73195	2.40872	2.6045	2.76436	2.76436
NR4A2	ENSG00000153234.9	180	1.05152e-11	3.03929e-10	3.22143	3.98163	2.59688	2.30142	1.30802	3.6183
ETV3	ENSG00000117036.7	181	1.16837e-14	6.0496e-13	3.4173	2.61467	2.25231	1.82593	2.28192	3.02821
RLF	ENSG00000117000.8	184	5.49517e-11	1.35747e-09	2.67263	2.3287	2.30274	2.47336	1.77725	2.48935
ZBTB11	ENSG00000066422.4	188	4.6446e-09	7.26277e-08	2.82132	2.31046	2.09307	2.8037	1.77774	1.09226
FAM134B	ENSG00000154153.9	189	8.78535e-09	1.27544e-07	3.09676	1.35574	3.17862	2.93109	1.43853	1.07665
PDP1	ENSG00000164951.11	191	2.02505e-11	5.49752e-10	1.50497	3.79208	1.06211	2.23673	1.95605	1.38391
TMPRSS2	ENSG00000184012.7	192	2.20468e-08	2.88333e-07	1.9531	2.47232	1.55975	1.62252	2.52036	1.93795
ACOT9	ENSG00000123130.12	193	1.52456e-09	2.66066e-08	1.19681	2.25934	1.13527	1.05369	1.91368	3.29591
2019-03-01	ENSG00000186205.8	195	2.20485e-07	2.25461e-06	1.41641	2.25148	1.99742	2.31735	1.5408	1.41009
MBD4	ENSG00000129071.5	197	2.51069e-11	6.6205e-10	2.13435	3.64887	2.59125	2.4444	1.14118	1.44719
B3GALNT2	ENSG00000162885.8	199	2.65673e-11	6.97035e-10	3.0016	3.67778	2.12842	2.93154	2.82104	2.21166
TM7SF2	ENSG00000149809.10	203	3.71179e-11	9.53059e-10	1.93139	3.18735	2.45805	2.47105	1.87543	2.23286
KIAA1244	ENSG00000112379.8	203	4.4025e-08	5.33245e-07	-1.74035	1.74498	-1.04297	1.36365	2.12972	-1.08578
PLA2G2A	ENSG00000188257.6	204	5.0652e-08	6.02169e-07	3.15191	3.15191	3.15191	3.13239	3.15191	3.09234
LTF	ENSG00000012223.8	205	2.51567e-08	3.24567e-07	3.21939	2.89522	3.33947	1.5034	2.23261	2.9397
TEX9	ENSG00000151575.10	210	2.75597e-07	2.73273e-06	1.33648	2.23232	1.59626	2.5818	1.95939	1.76454
TOPORS	ENSG00000197579.3	217	7.11783e-11	1.71497e-09	1.88987	3.53025	2.07862	2.26761	1.08972	1.42143
CERS4	ENSG00000090661.7	218	3.36767e-08	4.20273e-07	1.58906	2.19375	2.63367	2.32164	2.62241	1.23386
HIST1H2BG	ENSG00000187990.4	219	8.14488e-08	9.24249e-07	2.75077	2.17598	2.09479	2.34635	-4.64015	1.88064
FAM129A	ENSG00000135842.12	220	3.48811e-09	5.59421e-08	2.08532	2.13505	1.37527	1.70445	1.67424	2.3061
EP300	ENSG00000100393.9	224	4.24025e-13	1.62911e-11	2.30391	1.90778	1.22929	1.77272	1.32263	1.77568
SLC2A3	ENSG00000059804.11	230	8.44409e-09	1.23287e-07	3.23426	3.07891	2.3192	2.86632	1.95627	3.13711
HYPK	ENSG00000242028.1	232	3.961e-07	3.75382e-06	1.19979	1.99911	1.02561	2.51599	-1.81114	1.80252
RGPD6	ENSG00000183054.7	233	2.36613e-09	3.94447e-08	1.24658	3.49541	2.12217	3.00294	1.24293	2.71184
SLC38A2	ENSG00000134294.9	235	4.44602e-09	6.96617e-08	1.88044	2.03189	1.31918	2.64902	-1.77693	1.45515
PIK3R4	ENSG00000196455.3	237	7.07498e-08	8.11081e-07	2.2614	3.47739	3.4919	3.00913	1.52161	2.66256
SQRDL	ENSG00000137767.9	255	1.36449e-09	2.42736e-08	2.26568	4.03407	1.97215	3.30685	2.08034	1.581
DIO2	ENSG00000211448.7	257	1.34347e-07	1.45283e-06	2.05613	2.20201	1.78456	2.08591	2.19105	2.20201
ENSA	ENSG00000143420.13	258	3.11179e-09	5.04107e-08	2.10729	3.4946	2.38894	2.32693	2.93361	2.16445
HOXA5	ENSG00000106004.4	258	2.56294e-07	2.56081e-06	1.88417	1.75947	1.90917	1.58858	1.97478	1.95728
MIA3	ENSG00000154305.12	262	1.56883e-07	1.6677e-06	2.50052	2.08027	-2.5943	1.74394	2.00883	1.23755
PRICKLE1	ENSG00000139174.6	267	2.92441e-07	2.87603e-06	2.15222	2.23424	2.00554	1.28759	2.23764	2.07723
PCDH7	ENSG00000169851.11	274	1.60985e-07	1.70665e-06	1.85168	1.85168	1.58996	1.57353	1.85168	1.85168
ASPH	ENSG00000198363.11	278	8.21414e-07	7.12236e-06	-1.7741	2.79126	-1.1556	1.23061	3.68643	1.4426
RUSC1	ENSG00000160753.11	280	8.72288e-10	1.62574e-08	1.72091	3.15782	1.63587	2.07536	1.96275	1.7953
GNB5	ENSG00000069966.14	282	1.31147e-06	1.08793e-05	1.50623	1.83103	1.77071	2.29295	1.74917	1.68927
LAPTM4B	ENSG00000104341.12	290	2.18092e-08	2.85859e-07	-1.35569	-2.12684	-2.11308	-2.05663	-1.93539	-5.20516
IRF7	ENSG00000185507.15	294	2.80162e-07	2.76572e-06	1.66279	1.41658	2.23997	1.54654	1.42367	1.72434
OAZ3	ENSG00000143450.10	295	4.34647e-08	5.2827e-07	1.894	2.60895	2.46152	1.76528	1.41051	1.61425
CBR3	ENSG00000159231.5	296	1.42749e-09	2.51087e-08	2.23975	2.97325	2.2973	2.11803	1.3774	1.79216
MRPL9	ENSG00000143436.6	298	1.89239e-11	5.15529e-10	3.76588	2.02099	1.97649	1.28202	2.30715	1.57764
ASH1L	ENSG00000116539.6	299	1.92187e-11	5.22648e-10	2.94664	2.09541	1.41756	2.3751	1.11595	1.82031
BAIAP2L1	ENSG00000006453.9	304	2.08297e-11	5.62545e-10	2.90425	1.50164	1.101	1.9272	2.21718	1.26534
RAP2B	ENSG00000181467.2	308	2.5876e-11	6.80039e-10	3.21166	2.86681	1.71389	2.78934	3.22304	2.06828
PNP	ENSG00000198805.7	310	8.30991e-10	1.55806e-08	3.78038	3.20226	3.45586	2.85097	-1.40348	1.10136
PPP1R10	ENSG00000204569.5	310	1.26655e-08	1.76831e-07	2.97562	1.47709	2.51812	2.85742	-1.6484	1.16512
KRBOX1	ENSG00000240747.3	315	8.02294e-07	6.98523e-06	2.62765	2.52836	2.54025	2.41775	2.62765	2.62765
SART3	ENSG00000075856.7	319	2.48278e-06	1.91247e-05	1.6349	2.11523	1.28395	2.65446	1.35729	1.94348
NABP1	ENSG00000173559.8	324	3.03052e-09	4.92601e-08	3.55491	4.251	2.57948	2.81539	1.22267	2.02159
ALOX15B	ENSG00000179593.11	335	9.00088e-07	7.74611e-06	2.11065	2.22877	1.82726	2.22877	2.22877	2.22877
SCUBE2	ENSG00000175356.8	338	3.68973e-06	2.72925e-05	1.28008	1.89843	2.10536	2.19891	1.96624	2.03961
TDRD1	ENSG00000095627.5	345	2.17071e-06	1.69802e-05	1.33231	1.23582	1.2138	1.17894	1.36889	1.36889
CDCA7	ENSG00000144354.9	346	3.47584e-08	4.31363e-07	2.3083	2.68306	2.39561	2.33163	1.7728	2.23801
DDIT4	ENSG00000168209.4	349	5.92212e-09	9.01695e-08	2.00874	2.72625	1.66495	1.77288	1.40266	1.30905
NR1H3	ENSG00000025434.14	350	4.96862e-08	5.93086e-07	2.66655	2.94515	2.67197	2.25367	2.25101	2.68376
RHOV	ENSG00000104140.6	351	5.98563e-09	9.08711e-08	1.19276	2.46081	2.05719	1.63186	1.48019	1.38709
GALNT2	ENSG00000143641.8	353	6.04259e-09	9.15581e-08	2.24471	2.83059	1.77873	2.12918	2.21495	2.45285
PIP5K1A	ENSG00000143398.15	355	1.3112e-10	2.94164e-09	3.6376	3.27172	2.44337	2.6597	1.77926	2.82177
BRINP3	ENSG00000162670.8	355	1.30776e-06	1.08543e-05	1.97066	2.03565	2.03565	1.98212	2.03565	2.03565
RAP1GDS1	ENSG00000138698.10	356	2.352e-10	5.02434e-09	-3.08472	-2.21409	-1.21705	-1.21631	-2.53864	-3.63463
CXCR4	ENSG00000121966.6	357	1.88435e-08	2.51628e-07	2.16037	3.2649	2.85396	2.31981	-2.02657	2.99872
GLYATL1	ENSG00000166840.9	357	1.66745e-06	1.35098e-05	2.31212	1.37053	2.2893	2.31212	2.30424	1.65732
RIT1	ENSG00000143622.6	358	6.47251e-09	9.72244e-08	2.88569	3.67518	2.60397	1.98391	2.64946	3.63679
NXF1	ENSG00000162231.9	359	1.19744e-08	1.68385e-07	3.35893	3.90134	2.48938	3.28756	-1.32909	2.34303
FAIM2	ENSG00000135472.4	363	7.08174e-06	4.84839e-05	1.15967	1.62589	1.22258	1.40028	1.71788	1.43843
SF3B4	ENSG00000143368.9	376	3.06323e-06	2.30287e-05	1.66637	1.91042	1.29278	1.48812	2.10479	2.26372
TFDP2	ENSG00000114126.13	378	2.43436e-07	2.45271e-06	1.30141	3.27191	1.4096	2.75737	1.76979	1.33292
NEBL	ENSG00000078114.14	387	3.52691e-10	7.24708e-09	4.09142	1.96071	2.52841	3.12441	1.22333	1.06646
TAGLN2	ENSG00000158710.10	394	1.29065e-08	1.79874e-07	1.23999	3.80232	2.07806	1.61742	1.66309	1.30066
CCDC14	ENSG00000175455.10	401	5.81211e-06	4.09203e-05	1.98871	2.72323	2.51067	2.55455	1.105	2.065
BDH1	ENSG00000161267.7	402	1.56764e-08	2.14652e-07	1.88865	2.59066	1.65053	1.97925	2.01339	1.25882
CKB	ENSG00000166165.8	406	1.81954e-08	2.44015e-07	1.27765	3.55396	1.41881	2.34536	1.93137	-2.89959
YAP1	ENSG00000137693.9	410	1.96293e-08	2.61229e-07	1.99397	2.82339	1.84677	1.43615	1.62799	2.2057
C16orf45	ENSG00000166780.6	412	1.50817e-05	9.36587e-05	1.20304	1.0484	1.50878	1.44905	1.57277	1.51205
YOD1	ENSG00000180667.6	415	1.06347e-08	1.51746e-07	2.87819	2.97753	1.08398	1.99641	2.00004	2.50208
PPP1R1C	ENSG00000150722.6	425	4.23058e-06	3.07262e-05	1.66965	1.66965	1.66965	1.66965	1.66965	1.58418
CLDN10	ENSG00000134873.5	434	5.64769e-06	3.98802e-05	2.0639	2.0639	1.73287	1.62135	2.0639	2.0639
SMIM7	ENSG00000214046.4	437	2.29398e-05	0.000135311	-1.83891	1.25805	1.57214	1.76286	-2.33763	-1.53663
TAF10	ENSG00000166337.5	438	6.44214e-06	4.4692e-05	1.42537	1.15537	2.34735	1.03133	1.89578	1.16408
DCAF6	ENSG00000143164.11	442	1.66078e-09	2.88231e-08	2.92087	2.85925	1.68834	1.66404	1.07215	2.24399
CALML4	ENSG00000129007.10	446	2.6889e-05	0.000155038	1.2802	1.74826	1.38668	1.62453	2.09652	1.68419
GPR183	ENSG00000169508.6	448	1.4489e-06	1.19307e-05	2.64293	2.69005	1.59159	2.50841	1.72029	2.40423
KCTD3	ENSG00000136636.8	449	7.67395e-06	5.19695e-05	1.02453	1.65467	2.5031	1.89554	1.39532	1.25686
CHST9	ENSG00000154080.8	450	5.41683e-06	3.84315e-05	1.75388	1.75388	1.75388	1.63413	1.75388	1.75388
DTX2	ENSG00000091073.15	451	1.07561e-05	7.0022e-05	1.79071	1.82763	1.71764	1.80482	1.84943	1.63348
TANC1	ENSG00000115183.9	454	1.55189e-07	1.65267e-06	1.44751	2.55377	1.22819	1.95209	2.20009	1.55224
SCPEP1	ENSG00000121064.8	463	2.71372e-09	4.45273e-08	3.20875	2.27012	1.00965	-1.55924	1.95674	2.09719
SLC40A1	ENSG00000138449.6	468	4.54758e-08	5.48269e-07	-2.81859	2.81571	2.12192	2.19454	1.64712	-1.4779
SCGB2A1	ENSG00000124939.4	469	1.88044e-05	0.000113838	-1.74322	1.81712	2.41701	2.29845	2.44537	2.06
LAMA3	ENSG00000053747.11	471	3.93069e-08	4.8245e-07	2.09646	1.57489	1.76274	1.73178	1.15324	-3.1989
DNAJA1	ENSG00000086061.11	472	7.3659e-07	6.47082e-06	1.49288	1.76486	1.69984	2.34147	-1.10595	1.12174
DEDD	ENSG00000158796.12	486	6.23264e-08	7.24654e-07	1.61084	3.52301	2.2655	1.7237	2.19203	1.21204
STIM1	ENSG00000167323.5	489	5.2593e-09	8.10243e-08	2.27029	1.58378	1.54171	1.59333	2.00873	1.18157
VPS37B	ENSG00000139722.2	506	1.57502e-06	1.28333e-05	2.19845	2.13141	2.06458	1.9815	2.25288	1.92928
CLEC3A	ENSG00000166509.6	509	9.16878e-06	6.07252e-05	-2.77669	2.10387	2.09593	2.01057	1.20869	1.52556
PDE8B	ENSG00000113231.9	513	8.49845e-06	5.69611e-05	1.48526	1.65211	1.42144	1.56433	1.53732	1.65211
F11R	ENSG00000158769.13	539	1.5324e-07	1.63629e-06	1.87273	3.0511	1.53021	1.56209	1.50664	2.88487
BANK1	ENSG00000153064.7	541	2.27068e-05	0.000134038	1.90998	1.90658	1.75205	1.90998	1.0582	1.63992
STX19	ENSG00000178750.2	543	7.89455e-05	0.000391771	1.1276	1.58405	1.15619	1.40896	1.69092	1.45967
SERTAD1	ENSG00000197019.4	545	1.35177e-05	8.49622e-05	2.02896	1.9133	2.14417	1.52251	-2.39565	1.026
CCT8	ENSG00000156261.8	545	4.04865e-05	0.000221669	-1.11289	2.75943	1.01893	1.554	-1.97649	-1.66622
PDCD6IP	ENSG00000170248.9	546	6.69944e-05	0.000338983	1.49448	1.47659	1.57163	2.45742	2.22167	-1.19745
CREBRF	ENSG00000164463.8	547	2.3248e-08	3.02688e-07	2.84624	2.73312	2.38705	1.83914	1.16902	1.50603
APMAP	ENSG00000101474.7	555	3.0055e-06	2.26383e-05	1.16473	3.06091	1.63014	2.69325	1.16724	2.74218
CYBRD1	ENSG00000071967.7	558	9.23522e-05	0.000449739	1.26936	1.18122	1.18311	1.24001	1.73387	1.40383
ISY1	ENSG00000240682.5	563	2.09088e-07	2.14407e-06	2.59123	3.2476	2.61706	2.01201	1.25403	2.25504
RASD1	ENSG00000108551.4	568	2.20602e-07	2.25461e-06	1.91023	2.15179	-1.37856	1.12531	1.45339	1.41876
SCGB2A2	ENSG00000110484.6	574	7.30302e-06	4.98026e-05	-3.41415	-2.48964	2.51522	3.24147	2.99021	3.66232
NFIL3	ENSG00000165030.3	577	3.08014e-08	3.88734e-07	2.99887	2.68775	1.68986	2.0011	1.63362	1.9466
GPNMB	ENSG00000136235.11	588	1.58729e-06	1.29005e-05	2.53488	2.5635	1.35195	-2.73973	2.33534	1.53106
MAP7D1	ENSG00000116871.11	604	5.49071e-08	6.46522e-07	2.41729	2.21987	1.66244	1.47061	2.03928	1.5376
RRP12	ENSG00000052749.9	607	5.59709e-08	6.58057e-07	2.35397	1.81682	1.76208	1.9259	1.01023	1.00085
PPP1R12B	ENSG00000077157.16	629	3.99851e-07	3.7825e-06	1.32783	2.22094	1.4845	1.50639	1.57058	1.59149
PRUNE	ENSG00000143363.11	631	8.92209e-08	1.00226e-06	2.69213	1.98712	1.86167	1.5395	2.41599	1.20048
MTF1	ENSG00000188786.9	636	5.96198e-06	4.18177e-05	2.13979	1.66236	1.52626	1.85475	2.04245	1.02049
YY1AP1	ENSG00000163374.15	638	3.39059e-07	3.27883e-06	2.75885	2.66165	1.88575	2.52193	2.40373	2.78917
FAM136A	ENSG00000035141.3	643	1.14847e-07	1.25672e-06	-2.64802	1.32867	-2.04059	-1.12011	-2.14346	-2.43619
NBPF9	ENSG00000168614.13	669	1.85369e-07	1.92599e-06	1.77251	1.67269	1.31988	1.12134	1.25829	1.42204
CAPNS1	ENSG00000126247.6	676	1.6401e-05	0.00010085	-1.71657	-1.60155	-1.16028	-1.96524	-1.88956	-2.3245
CRISP3	ENSG00000096006.7	685	8.71778e-05	0.000427872	1.0917	1.92343	1.18614	1.84206	1.92343	1.92343
RCAN1	ENSG00000159200.13	704	6.73819e-06	4.65188e-05	2.13996	1.19095	-1.42782	-1.18449	2.04962	1.29408
NDNF	ENSG00000173376.9	712	8.47155e-05	0.000417096	1.044	1.11696	1.11696	1.04039	1.11696	1.11696
OR2A4	ENSG00000180658.2	716	9.58214e-05	0.000464463	1.62383	1.75487	1.26457	1.76746	1.76746	1.76746
LY86	ENSG00000112799.4	728	4.09347e-05	0.000223732	1.91936	1.91936	1.91936	1.75895	1.13541	1.89625
RARRES3	ENSG00000133321.6	733	0.000298835	0.00123328	1.65509	-1.56452	2.28293	2.60825	-3.51392	2.21554
SETDB1	ENSG00000143379.8	738	5.46972e-07	5.01348e-06	2.3716	2.10658	1.21228	1.81035	1.4076	1.94683
FGD5	ENSG00000154783.6	739	0.000155159	0.000701016	1.02316	1.18809	1.14741	1.17655	1.0479	1.0711
C1orf74	ENSG00000162757.3	742	4.59563e-05	0.000246779	1.64411	1.9139	1.33626	1.77475	1.75935	1.6173
ANKRD42	ENSG00000137494.9	742	0.000127511	0.000593068	1.02763	1.11601	1.51053	1.0303	-1.48106	1.46782
GLA	ENSG00000102393.5	755	5.5381e-05	0.00028828	2.65139	2.43527	1.93057	2.55366	-3.02886	1.60178
LY9	ENSG00000122224.13	774	4.59925e-05	0.000246866	1.6947	1.6947	1.68219	1.59453	1.40378	1.6947
TNIK	ENSG00000154310.12	780	1.9747e-05	0.000118809	1.01589	1.83913	1.61742	1.58277	-1.50394	1.76402
NPC1	ENSG00000141458.8	821	1.44812e-06	1.19306e-05	2.78008	1.49292	1.18983	2.18917	1.22052	2.44551
HSD17B7	ENSG00000132196.9	834	1.64499e-05	0.000101072	2.58693	2.63549	2.42279	1.7776	1.06509	2.15471
INPP5B	ENSG00000204084.8	841	0.000371284	0.00148333	1.39675	1.2568	1.09887	1.4864	1.07355	1.12298
SLC43A3	ENSG00000134802.13	851	6.08253e-06	4.25783e-05	1.97987	1.62944	1.64578	-1.15003	1.16704	1.63492
NTAN1	ENSG00000157045.4	851	2.17062e-05	0.000128763	2.18865	2.32507	1.08081	1.42805	1.65341	2.49242
YARS	ENSG00000134684.6	856	2.0327e-06	1.60857e-05	2.47148	1.80575	1.18467	1.25202	1.90977	-1.92969
ECHS1	ENSG00000127884.4	858	0.000645671	0.00237188	-1.13068	1.7785	1.62194	2.30306	-1.29928	-1.4892
GNMT	ENSG00000124713.5	873	0.000317687	0.00129908	1.47325	1.39618	1.47325	1.33594	1.47325	1.42163
RNF7	ENSG00000114125.9	876	4.37961e-05	0.000236396	1.31793	2.64422	2.24078	2.13024	2.16605	-1.06959
MSL2	ENSG00000174579.3	879	7.60958e-05	0.000379436	1.45289	1.92059	1.44443	1.71643	1.20886	1.11718
PRPF18	ENSG00000165630.9	880	7.13098e-06	4.87996e-05	1.47219	2.65468	2.0878	2.16158	2.27822	1.93212
ALDH3A2	ENSG00000072210.14	888	8.29346e-05	0.000409617	1.0143	1.32231	1.01804	1.25982	-1.53777	-2.50583
PNISR	ENSG00000132424.10	928	6.8013e-06	4.68924e-05	1.1996	2.63587	-1.20828	1.55276	1.30939	1.13326
SPPL2A	ENSG00000138600.5	931	3.11266e-05	0.000176222	1.61579	2.32735	1.76631	1.98195	1.86243	2.12435
IRF4	ENSG00000137265.10	940	7.07354e-05	0.000356114	1.62582	1.61983	1.38017	1.50965	1.00445	1.62582
RGPD8	ENSG00000169629.7	944	0.000379331	0.00151239	1.16903	2.18283	1.88933	2.03623	1.43678	1.94767
GPR110	ENSG00000153292.11	957	0.000765997	0.0027378	1.02599	1.38327	1.26814	1.35233	1.40303	1.34063
DECR1	ENSG00000104325.2	958	0.000738921	0.00265927	1.59466	2.06342	1.71619	2.20887	-1.98111	-1.98522
NOTCH2NL	ENSG00000213240.7	985	8.97197e-06	5.96999e-05	2.08397	2.39011	1.34453	1.79287	2.31704	1.48312
UBAP1	ENSG00000165006.9	1001	1.25141e-05	7.95785e-05	1.50736	1.77675	1.11709	1.16062	1.37331	1.20269
SHISA2	ENSG00000180730.4	1005	0.000332589	0.00135153	1.46979	1.33983	1.73075	1.51883	-1.80291	1.74603
PMF1	ENSG00000160783.15	1006	6.43779e-06	4.46817e-05	2.36527	2.5291	1.77721	1.21359	1.21655	1.32799
PRSS48	ENSG00000189099.7	1031	0.0010675	0.0036375	1.16625	1.04062	1.09786	1.11434	1.15427	1.02241
XPNPEP1	ENSG00000108039.13	1046	0.00046212	0.00178468	1.42924	2.23897	1.40327	1.98502	1.57624	1.14335
FHOD1	ENSG00000135723.9	1052	1.27004e-05	8.05994e-05	2.18997	2.01597	1.67995	1.73468	1.11356	1.94884
SCYL3	ENSG00000000457.9	1060	1.96778e-05	0.000118438	1.09121	2.10684	1.40512	1.40143	1.56181	-1.12026
ZNF669	ENSG00000188295.10	1065	2.41782e-05	0.000141548	1.24757	2.0099	1.21304	1.66771	1.39135	1.50461
GGT1	ENSG00000100031.14	1146	3.22388e-05	0.00018173	1.48277	2.33217	1.75948	1.63497	1.2809	2.20183
ATF2	ENSG00000115966.12	1166	3.58277e-05	0.000199019	1.42784	2.41289	1.8589	1.68822	-1.93134	1.7617
PTPN22	ENSG00000134242.11	1188	0.000102455	0.000491889	1.65913	1.65913	1.34809	1.20846	1.22577	1.59064
RRAGC	ENSG00000116954.7	1338	0.000126309	0.000588174	2.08802	2.31213	1.35185	1.05781	1.58891	1.19595
USP15	ENSG00000135655.9	1357	0.000134829	0.000621374	1.86313	1.55364	1.64322	1.21182	1.30352	1.98933
RNF115	ENSG00000121848.9	1430	0.000990931	0.00341304	1.45558	1.78325	1.24397	1.4825	1.57484	1.48073
CCNG1	ENSG00000113328.14	1460	0.00148849	0.0048098	1.39213	1.2074	-2.00518	1.16128	-1.43494	-2.80534
ZNF143	ENSG00000166478.5	1755	0.000767632	0.0027424	1.24379	2.24464	1.6033	1.82953	1.49641	1.00016

## Sheet: C3
# Supplementary table 4.3. DEGs of lncRNA subtypes (C3)
Name	Ensembl_ID	Top	p.value	FDR	logFC.1	logFC.2	logFC.4	logFC.5	logFC.6	logFC.7
CA12	ENSG00000074410.9	1	3.76877e-37	2.94661e-34	2.19883	6.86608	7.01303	6.34251	2.53479	2.11437
NFIB	ENSG00000147862.10	2	3.15623e-69	2.4677e-65	-6.75652	-6.45188	-4.48703	-4.75684	-1.07034	-5.84622
C4A	ENSG00000244731.3	2	9.57054e-36	6.80248e-33	6.65142	4.61034	3.6784	6.07018	4.02632	6.62277
RPL7	ENSG00000147604.9	2	9.78551e-26	2.25024e-23	-1.92803	-2.02975	-1.59401	-2.68271	-3.39086	-4.77787
IFITM1	ENSG00000185885.11	3	9.29238e-44	1.21087e-40	10.5264	7.19333	6.64527	5.49483	5.08021	10.3154
AGR3	ENSG00000173467.4	3	1.43207e-27	4.07151e-25	8.31258	6.46056	7.81322	7.8527	2.47639	7.22431
KPNA2	ENSG00000182481.4	3	3.12913e-18	2.56179e-16	-1.59481	-1.78058	-3.2029	-1.09356	-6.82256	-2.56352
MGP	ENSG00000111341.5	4	3.57168e-33	1.86168e-30	-2.06911	10.6943	9.6657	3.29189	1.79005	12.0856
EMC2	ENSG00000104412.3	4	2.11368e-24	4.03068e-22	-4.73915	-3.07475	-3.62866	-4.35695	-3.53508	-6.67975
EHF	ENSG00000135373.8	5	5.44878e-56	1.70405e-52	-7.18403	-7.69008	-6.14323	-4.70499	-3.19819	-6.41684
C4B	ENSG00000224389.4	5	9.00095e-32	3.804e-29	6.44986	4.40156	3.74782	5.88967	3.90569	6.42443
TCEB1	ENSG00000154582.12	5	7.90391e-18	5.9707e-16	-3.08306	-3.36228	-3.19616	-2.27178	-5.88336	-5.35091
ESR1	ENSG00000091831.17	6	1.02081e-26	2.57459e-24	6.60152	6.71867	6.13932	6.17475	2.47054	2.5041
OLA1	ENSG00000138430.11	6	2.61957e-17	1.84515e-15	-2.79357	-2.97596	-3.14696	-1.39054	-5.70184	-4.14838
IFITM2	ENSG00000185201.12	7	4.52203e-52	1.01016e-48	9.1741	6.14783	7.15347	4.55408	2.15234	6.60022
RAB11FIP1	ENSG00000156675.11	7	3.7725e-24	6.85937e-22	3.78277	4.42058	1.32287	6.17799	3.61995	3.59366
HEBP2	ENSG00000051620.6	8	2.28775e-33	1.23357e-30	-5.06002	-5.19363	-2.92774	-4.03439	-1.13418	-2.6402
MAL2	ENSG00000147676.9	8	4.22558e-22	5.69615e-20	-4.20339	-3.94264	-5.25629	-2.99492	-4.94647	-5.92157
IFITM3	ENSG00000142089.11	9	4.95097e-51	8.60204e-48	10.083	3.57018	5.10589	2.62441	2.32213	6.50427
GARS	ENSG00000106105.9	9	1.28158e-21	1.56564e-19	-2.15928	-3.33027	-3.31241	-3.18172	-2.71248	-6.62925
PPAPDC1B	ENSG00000147535.12	9	8.25439e-18	6.20548e-16	4.01554	5.01858	3.7419	6.33254	5.30171	5.39735
MSL1	ENSG00000188895.7	10	1.47592e-29	4.84426e-27	-7.26348	-1.32502	-6.169	-1.51503	-4.69613	-1.5875
SERPINA3	ENSG00000196136.12	10	2.25056e-27	5.96475e-25	8.2478	7.85498	8.18937	4.96745	2.94049	7.81984
STOML2	ENSG00000165283.11	11	3.79582e-21	4.42949e-19	-3.98822	-1.98456	-2.30818	-2.84223	-2.83811	-5.35461
HSPD1	ENSG00000144381.12	11	2.20022e-15	1.10272e-13	-2.53624	-2.93576	-3.04467	-2.02944	-4.82709	-3.52138
ZFAND1	ENSG00000104231.6	12	3.86052e-21	4.47163e-19	-4.2954	-2.71837	-2.81819	-2.35556	-2.72679	-6.79727
ERLIN2	ENSG00000147475.10	12	3.69543e-17	2.53445e-15	4.58384	4.97558	5.13755	5.06716	5.09773	4.69301
COPS5	ENSG00000121022.9	13	5.84313e-15	2.74381e-13	-4.33096	-2.79502	-2.43399	-3.15915	-5.5268	-4.64338
IFI6	ENSG00000126709.10	14	6.52415e-27	1.67243e-24	6.22466	6.55356	6.60554	4.90829	6.45199	6.82733
UBE2V2	ENSG00000169139.7	14	4.29889e-25	8.9629e-23	-6.12771	-3.99759	-2.98134	-3.71859	-5.80481	-3.95804
LYPLA1	ENSG00000120992.13	14	9.48986e-21	1.03771e-18	-4.52355	-4.97857	-2.42425	-2.80513	-4.99521	-6.14059
IDH1	ENSG00000138413.9	16	1.03285e-38	1.00941e-35	-7.0889	-5.74157	-2.96155	-3.37767	-4.94098	-5.03749
CTTN	ENSG00000085733.11	16	9.31367e-22	1.18405e-19	2.39651	3.90731	2.252	5.05977	5.50996	3.32166
MRPL13	ENSG00000172172.3	18	2.58589e-19	2.45064e-17	-5.05842	-4.09976	-3.43856	-3.90228	-4.98467	-6.1729
TROVE2	ENSG00000116747.8	18	2.21404e-15	1.1061e-13	-4.0445	-4.28944	-3.11699	-4.4439	-3.96937	-3.2157
NVL	ENSG00000143748.13	19	1.97431e-14	8.48138e-13	-2.4309	-2.91657	-1.35823	-1.4127	-4.80834	-2.55744
C1orf198	ENSG00000119280.12	21	8.62699e-22	1.11488e-19	-3.86341	-5.87178	-3.20157	-3.78606	-2.84871	-3.3507
KLHL24	ENSG00000114796.11	23	4.91028e-21	5.60453e-19	-1.79267	-5.41958	-3.24644	-1.97052	-3.0289	-2.1376
MMADHC	ENSG00000168288.8	23	1.84854e-18	1.54576e-16	-4.6988	-4.04403	-3.16617	-2.96706	-3.63969	-5.54815
SFT2D2	ENSG00000213064.5	23	1.56151e-13	5.47475e-12	-1.23797	-3.14789	-1.7086	-3.46121	-1.62463	-2.42925
TSTA3	ENSG00000104522.11	25	1.41463e-29	4.80882e-27	-5.68323	-3.35359	-2.11198	-2.55065	-3.33578	-6.14817
ABRACL	ENSG00000146386.7	25	1.06197e-23	1.805e-21	-7.70498	-6.30091	-5.96024	-2.74553	-4.04727	-2.82668
S100A6	ENSG00000197956.5	25	1.47811e-16	9.31987e-15	1.2434	5.73486	-2.01412	-1.27419	6.93621	1.92895
TIMP1	ENSG00000102265.7	26	2.7485e-23	4.17265e-21	6.96398	6.66285	5.24395	4.46277	5.39489	7.54484
HSPB8	ENSG00000152137.2	26	1.49924e-15	7.68645e-14	5.4082	4.73919	3.82675	4.96615	-2.35286	-2.2241
MRPL18	ENSG00000112110.5	27	1.10338e-22	1.5685e-20	-3.44395	-4.6736	-5.57757	-2.70184	-5.51192	-4.3615
MCM4	ENSG00000104738.12	27	7.28773e-20	7.35214e-18	-2.90452	-4.34314	-2.50182	-2.3132	-4.94904	-1.49459
SNCG	ENSG00000173267.9	28	7.83235e-17	5.21168e-15	-5.55196	1.36388	1.30497	1.10519	-5.59178	1.46316
EEF1D	ENSG00000104529.13	30	3.50019e-17	2.41112e-15	-3.58206	-2.78694	-3.26034	-4.49802	-4.43817	-6.62125
TMSB4X	ENSG00000205542.6	31	1.48052e-13	5.22595e-12	-3.02645	-3.51999	-4.89426	-2.83581	-5.0006	-2.7519
TATDN1	ENSG00000147687.12	32	1.3887e-16	8.82731e-15	-3.13396	-2.57469	-1.94391	-2.81005	-3.04916	-5.93112
PHPT1	ENSG00000054148.13	33	1.42822e-17	1.03874e-15	-4.94243	-3.37733	-2.70902	-3.561	-4.82851	-4.73622
CISD1	ENSG00000122873.7	33	1.72511e-16	1.07046e-14	-3.7647	-2.00472	-1.25359	-1.48594	-3.15723	-4.93813
ADIRF	ENSG00000148671.9	33	3.83828e-15	1.85818e-13	1.9087	4.02535	4.73307	4.92517	1.17183	6.71268
MRPL45	ENSG00000174100.5	35	1.1826e-31	4.86638e-29	-8.53676	-1.27915	-3.94101	-2.05503	-1.98119	-4.3318
ALG8	ENSG00000159063.8	35	4.8366e-21	5.56102e-19	4.30164	4.59328	6.53387	4.89429	4.73148	3.9118
CACYBP	ENSG00000116161.13	35	4.42571e-13	1.4066e-11	-1.69573	-4.00537	-3.38932	-1.61879	-5.05042	-2.52565
PVALB	ENSG00000100362.8	35	6.78362e-13	2.07179e-11	5.23444	5.39962	5.48161	5.29216	1.65914	3.14069
LDHB	ENSG00000111716.8	36	1.02259e-18	8.98329e-17	1.68904	-2.58877	-6.22192	-5.41849	-1.75292	-7.88107
KIAA1429	ENSG00000164944.7	36	2.4316e-16	1.47376e-14	-2.58312	-2.17191	-2.26535	-2.27245	-3.59762	-4.43278
HUWE1	ENSG00000086758.11	36	6.75164e-13	2.07011e-11	-1.30117	-1.45512	-2.18303	-1.65059	-3.5389	-2.17973
UBE2W	ENSG00000104343.15	39	3.14006e-16	1.85989e-14	-3.6037	-2.30386	-2.90926	-1.79145	-3.16604	-5.11906
STK17B	ENSG00000081320.6	42	9.29873e-22	1.18405e-19	-4.0046	-3.77874	-3.10656	-2.40095	-4.34547	-2.50456
PAICS	ENSG00000128050.4	42	4.11014e-16	2.34563e-14	-4.39963	-1.88353	-1.65541	-1.53038	-3.27258	-5.04816
TFF3	ENSG00000160180.14	42	8.64621e-12	2.02094e-10	3.64231	3.57397	-3.47999	5.76931	1.92251	2.1309
UCHL5	ENSG00000116750.9	44	6.61524e-17	4.42062e-15	-2.32562	-4.40602	-2.87938	-2.86964	-3.43082	-4.8903
EIF3E	ENSG00000104408.5	44	4.71617e-16	2.64325e-14	-3.31305	-1.92742	-1.12667	-2.84873	-3.36744	-5.19982
HNRNPA3	ENSG00000170144.14	44	1.72319e-12	4.78607e-11	-1.62709	-2.62814	-3.14364	-1.73327	-3.85412	-1.31615
RTN3	ENSG00000133318.9	46	1.14748e-16	7.38401e-15	-3.61316	-4.58371	-1.06731	-1.43014	-2.62537	-3.66166
WHSC1L1	ENSG00000147548.12	47	1.63989e-12	4.5873e-11	2.52399	2.732	2.50216	4.10912	2.42883	5.05157
BAG4	ENSG00000156735.6	48	1.8715e-14	8.15122e-13	2.58798	4.99851	2.9144	4.7252	4.01957	4.16822
CCT8	ENSG00000156261.8	48	3.45564e-12	8.96117e-11	-3.87232	-2.75943	-1.7405	-1.20543	-4.73592	-4.42565
B4GALT5	ENSG00000158470.5	51	3.48563e-17	2.41112e-15	-1.87936	-1.3233	-3.43465	-1.02683	-1.41848	-1.36105
SDHD	ENSG00000204370.4	51	1.42217e-15	7.31526e-14	-4.84325	-3.05731	-1.79585	-2.06226	-3.54021	-5.46286
HSPE1	ENSG00000115541.6	52	5.86129e-12	1.44563e-10	-3.05627	-3.2841	-3.92301	-2.12285	-4.36828	-2.8682
HBS1L	ENSG00000112339.10	53	1.28626e-26	3.19259e-24	-6.11403	-3.94729	-4.24357	-1.84983	-3.54315	-3.30408
RAB31	ENSG00000168461.8	53	1.62265e-12	4.56473e-11	4.16195	3.53813	3.79448	3.48331	4.02482	3.15225
RWDD1	ENSG00000111832.8	54	5.21993e-15	2.47346e-13	-1.49375	-2.32015	-1.8429	-1.85715	-1.599	-4.39688
PPIL4	ENSG00000131013.3	55	2.66473e-26	6.41052e-24	-5.27835	-3.76658	-3.54957	-2.17799	-2.55199	-2.01507
HDAC2	ENSG00000196591.7	55	1.00329e-16	6.56421e-15	-3.3631	-4.50213	-4.95955	-1.93317	-2.21727	-2.57909
ATP6V1H	ENSG00000047249.12	55	5.60801e-16	3.05549e-14	-3.56048	-4.84684	-2.97177	-2.98074	-4.94529	-4.40449
IFI30	ENSG00000216490.3	55	2.62057e-14	1.08407e-12	-3.68458	-2.85132	-3.1402	-2.30741	-5.72097	-4.06856
ZNF703	ENSG00000183779.5	55	3.8459e-11	7.78994e-10	2.282	2.08958	2.46163	2.52678	1.52455	2.53517
MPHOSPH6	ENSG00000135698.5	56	2.96654e-26	7.02844e-24	-5.38319	-2.27093	-3.38223	-1.0444	-1.8341	-4.36112
PUF60	ENSG00000179950.9	56	7.73665e-15	3.58985e-13	-3.6677	-1.68942	-2.8925	-2.52322	-2.53887	-5.12188
PPP1R14B	ENSG00000173457.6	57	1.17705e-25	2.62937e-23	-3.73535	-2.84122	-1.88154	-2.19507	-2.41183	-3.66531
PROSC	ENSG00000147471.7	57	4.08859e-15	1.96295e-13	4.38444	3.50992	3.71676	3.99309	4.50578	3.22527
UBE2E3	ENSG00000170035.11	58	7.65873e-18	5.87057e-16	-3.73967	-1.57575	-2.9946	-3.74469	-1.53402	-2.50036
CYC1	ENSG00000179091.4	58	1.8766e-14	8.15122e-13	-3.48169	-1.91837	-2.32154	-3.35798	-2.40533	-5.55098
SMS	ENSG00000102172.11	58	1.11221e-11	2.52419e-10	-3.55867	-2.33962	-2.03367	-1.53812	-4.71482	-2.81326
PBDC1	ENSG00000102390.6	59	2.38791e-16	1.45291e-14	-3.76649	-3.39476	-4.85728	-2.02077	-2.28013	-3.02967
ATP5G3	ENSG00000154518.5	59	1.12184e-11	2.54236e-10	-4.14603	-3.4635	-1.9912	-2.66339	-4.90285	-3.81155
NDUFC2	ENSG00000151366.8	60	6.50135e-18	5.10862e-16	1.79882	2.4267	5.70382	3.40181	2.00699	3.30037
PGRMC2	ENSG00000164040.12	61	2.56084e-14	1.065e-12	-2.43951	-1.9632	-1.14893	-1.17097	-1.60644	-4.31903
YWHAQ	ENSG00000134308.9	61	1.31436e-11	2.93608e-10	-3.69312	-3.38373	-4.07468	-2.27326	-4.07208	-3.54551
PGR	ENSG00000082175.10	61	7.90876e-12	1.87947e-10	3.82677	3.82342	3.82677	3.62208	3.12796	3.49723
TSPYL5	ENSG00000180543.3	62	4.09612e-18	3.3016e-16	-3.54706	-2.95993	-2.53989	-3.36094	-1.41863	-1.42412
NUCKS1	ENSG00000069275.12	62	1.4147e-15	7.30089e-14	-1.96612	-3.27316	-2.58695	-1.91403	-1.31951	-1.34227
DBI	ENSG00000155368.12	63	1.97725e-15	9.95481e-14	-4.95308	-6.12472	-3.87168	-3.8031	-4.7399	-3.82542
ISG15	ENSG00000187608.5	66	1.32681e-17	9.69505e-16	6.32424	5.92412	4.9206	3.72942	2.57812	2.68482
NDUFB9	ENSG00000147684.3	66	6.47636e-14	2.47606e-12	-2.78722	-3.08513	-1.9667	-1.81434	-3.15068	-4.48519
CDC73	ENSG00000134371.9	67	3.6514e-15	1.7732e-13	-2.23522	-3.6238	-1.96542	-2.87519	-2.89881	-2.18466
ESRP1	ENSG00000104413.11	68	9.84946e-14	3.63245e-12	-3.53791	-3.75997	-3.30786	-2.72553	-2.74094	-5.22651
GNPAT	ENSG00000116906.7	68	1.1442e-11	2.58926e-10	-1.48142	-3.21143	-1.6079	-3.25933	-1.44658	-2.47798
DLD	ENSG00000091140.8	70	1.19561e-13	4.31774e-12	-2.60912	-1.81825	-1.1767	-1.48719	-2.1999	-5.02998
EFNA1	ENSG00000169242.7	70	4.56239e-12	1.14923e-10	-3.28777	-5.24902	-3.00053	-4.49518	-3.54026	-2.62578
APEX1	ENSG00000100823.7	71	6.95994e-11	1.32885e-09	-1.69592	-3.83685	-1.44425	-2.59605	-4.45789	-4.21957
BST2	ENSG00000130303.8	73	5.99304e-15	2.80578e-13	-1.35506	6.17395	3.30831	4.67807	-1.66651	6.61711
TUBB4B	ENSG00000188229.5	74	9.62271e-13	2.84443e-11	-4.08891	-2.49645	-2.34681	-1.69492	-4.49154	-3.20244
FLAD1	ENSG00000160688.14	75	7.27041e-16	3.93382e-14	-4.42262	-4.64467	-1.65741	-2.68895	-3.12551	-3.46806
PHF20L1	ENSG00000129292.16	76	2.50899e-13	8.47368e-12	-3.10262	-1.15482	-3.45363	-3.42877	-3.45035	-5.25462
CPB1	ENSG00000153002.7	76	1.45898e-10	2.58078e-09	3.933	6.1331	6.06862	5.85702	6.00083	-2.24691
RBM34	ENSG00000188739.10	77	1.09664e-14	4.94183e-13	-1.52645	-4.50364	-2.77197	-3.42448	-3.53787	-2.8891
GUK1	ENSG00000143774.12	78	8.94501e-12	2.08144e-10	-3.95143	-3.58864	-2.99497	-4.00386	-3.66359	-3.84189
NOP56	ENSG00000101361.10	78	8.93155e-11	1.66861e-09	-1.76454	-3.08671	-2.88091	-1.36422	-4.26723	-3.09864
ZNF706	ENSG00000120963.7	80	4.03815e-13	1.29629e-11	-2.92742	-1.61539	-2.27387	-1.73375	-3.48975	-4.7653
COX20	ENSG00000203667.5	81	1.99821e-14	8.53715e-13	-2.31271	-4.49965	-1.43796	-3.31251	-3.3158	-3.40886
DESI2	ENSG00000121644.14	82	2.0714e-14	8.80355e-13	-1.76484	-3.58686	-2.17238	-1.97432	-1.33012	-1.17832
RNF19A	ENSG00000034677.7	83	2.52766e-14	1.054e-12	-3.46966	-4.2046	-4.25751	-2.10454	-1.51131	-3.54879
YBX1	ENSG00000065978.13	84	5.31767e-13	1.65973e-11	-2.74727	-3.84518	-2.3923	-3.06704	-3.20438	-3.9923
MBNL1	ENSG00000152601.13	85	2.62887e-14	1.08464e-12	-1.24497	-3.71639	-2.42444	-2.45619	-3.0363	-2.36954
HIST1H1E	ENSG00000168298.4	85	4.86046e-14	1.91443e-12	-1.57213	-2.02182	-3.36584	-1.106	-1.03948	-2.98085
METTL5	ENSG00000138382.9	86	1.00771e-16	6.56564e-15	-4.59545	-2.82357	-1.92708	-2.83014	-2.40758	-5.70449
H2AFZ	ENSG00000164032.7	86	1.65307e-10	2.88816e-09	-3.06096	-3.18492	-3.48715	-2.39024	-4.50487	-4.03117
EIF5B	ENSG00000158417.6	88	6.51701e-13	2.00999e-11	-2.39417	-1.91835	-2.27868	-1.81153	-2.7494	-3.42785
PSMD14	ENSG00000115233.7	89	1.26571e-21	1.56482e-19	-4.33593	-3.16544	-3.02174	-1.56929	-3.00968	-4.06166
CSTA	ENSG00000121552.3	90	5.8041e-12	1.43379e-10	-1.30408	3.8514	4.12375	3.62271	1.77024	4.175
IWS1	ENSG00000163166.9	91	8.12081e-13	2.4509e-11	-1.88465	-2.83965	-2.42219	-1.53858	-1.53433	-4.01653
NDUFS7	ENSG00000115286.15	92	8.13466e-13	2.4509e-11	-2.78924	-2.16986	-1.77565	-2.60408	-1.01198	-4.58526
TP53	ENSG00000141510.11	93	9.0655e-14	3.36716e-12	-3.56687	-2.47654	-2.0874	-1.6949	-3.07117	-3.15741
STARD7	ENSG00000084090.9	95	2.6272e-10	4.42689e-09	-3.16263	-2.38466	-1.91162	-2.67766	-3.9622	-3.26867
SDCCAG8	ENSG00000054282.11	98	1.65285e-20	1.77024e-18	-4.73409	-2.80772	-2.58501	-2.84773	-1.57512	-3.106
FABP5	ENSG00000164687.6	98	6.65304e-14	2.53123e-12	-1.21401	-4.93711	-1.23236	-2.69859	-1.97774	-3.71709
TOMM20	ENSG00000173726.6	98	1.28329e-11	2.87079e-10	-2.62177	-3.74045	-2.91971	-3.00235	-3.51747	-3.33777
GSTM1	ENSG00000134184.8	98	5.65971e-10	8.75379e-09	4.50568	3.74116	4.38255	4.18726	4.14873	1.15926
CKB	ENSG00000166165.8	99	1.26812e-12	3.63845e-11	-2.27631	-3.55396	-2.13515	-1.2086	-1.62259	-6.45355
TCEA1	ENSG00000187735.8	100	6.95577e-14	2.62723e-12	-2.28571	-4.00306	-2.09235	-2.38603	-3.5137	-2.56755
STAU2	ENSG00000040341.13	100	1.48081e-12	4.19482e-11	-2.1764	-1.17444	-2.47016	-1.04746	-3.24922	-4.87384
CD2AP	ENSG00000198087.7	103	4.89268e-20	5.03334e-18	-4.11632	-2.76741	-3.25358	-1.42704	-2.95506	-2.87829
MDH2	ENSG00000146701.7	103	1.80164e-12	4.97742e-11	-2.70428	-2.49219	-2.62047	-1.66122	-2.30844	-4.55367
CSDE1	ENSG00000009307.11	103	2.19017e-12	5.92521e-11	-2.35139	-3.72328	-2.05741	-2.59695	-3.28237	-3.4515
EPN2	ENSG00000072134.11	104	5.46063e-20	5.58091e-18	-4.12694	-2.13853	-1.10564	-1.24283	-1.38779	-1.2508
CST3	ENSG00000101439.4	104	1.23295e-13	4.4423e-12	2.95682	4.55242	1.19192	3.7146	2.12973	2.51412
C19orf48	ENSG00000167747.9	106	1.34457e-13	4.80025e-12	-2.78465	-4.04559	-2.22519	-1.84082	-4.0464	-5.10794
DERL1	ENSG00000136986.5	106	2.23893e-12	6.0233e-11	-2.17725	-2.4962	-2.34486	-2.30145	-3.13463	-4.13659
ABHD11	ENSG00000106077.14	107	1.44262e-13	5.11526e-12	-1.17653	-4.37061	-3.05146	-1.53735	-1.28667	-4.19421
RDX	ENSG00000137710.10	109	1.27073e-19	1.23419e-17	-4.67855	-2.63013	-3.18222	-1.30994	-2.76343	-3.94689
ZNF292	ENSG00000188994.8	110	1.65705e-12	4.61878e-11	-2.83136	-3.52543	-4.21857	-2.84287	-1.75914	-4.23401
NDRG1	ENSG00000104419.10	111	1.8102e-12	4.99226e-11	-1.59331	-1.76408	-3.52247	-3.53919	-2.40125	-2.83543
FOXO3	ENSG00000118689.10	114	8.40396e-18	6.28769e-16	-4.06371	-3.5018	-2.77294	-2.64655	-1.79818	-2.70854
TIMP3	ENSG00000100234.11	116	2.47254e-12	6.57536e-11	4.87683	4.78583	4.96346	2.6507	1.43626	4.16596
FNBP1L	ENSG00000137942.12	117	4.7625e-19	4.27995e-17	-3.75867	-2.47614	-1.30976	-1.75857	-2.93073	-2.45054
NTMT1	ENSG00000148335.10	117	4.31089e-12	1.09077e-10	-2.73799	-1.26754	-1.01561	-1.30142	-2.35737	-4.5871
PSENEN	ENSG00000205155.3	118	3.48393e-12	9.01957e-11	1.3058	2.04132	4.43974	2.05702	1.24141	1.4624
SH3YL1	ENSG00000035115.17	119	1.84338e-09	2.55314e-08	-2.97019	-1.45879	-2.5549	-3.45256	-1.30449	-2.85356
ADSS	ENSG00000035687.9	120	3.44135e-16	2.00046e-14	-2.60133	-3.37473	-1.54614	-1.9706	-2.18003	-2.09962
NUP54	ENSG00000138750.10	120	3.64298e-12	9.36929e-11	-2.61322	-2.16831	-3.94198	-1.85106	-1.31398	-2.05864
XRCC5	ENSG00000079246.11	120	1.19734e-11	2.69393e-10	-3.88237	-2.99985	-2.48736	-2.95832	-3.68149	-3.00918
KCNE4	ENSG00000152049.5	120	1.98159e-08	2.12379e-07	2.90628	2.77538	2.94881	2.94881	1.36656	2.12943
TAF2	ENSG00000064313.7	121	1.36314e-09	1.94307e-08	-1.99554	-2.02567	-1.84449	-1.63955	-4.09896	-3.67193
C11orf48	ENSG00000162194.8	122	1.48002e-18	1.25778e-16	-5.56834	-4.0938	-2.06556	-1.41786	-4.17028	-4.77811
PQBP1	ENSG00000102103.11	123	6.58706e-12	1.60406e-10	-2.00947	-2.5197	-1.73249	-2.00884	-3.45229	-4.08888
PDHA1	ENSG00000131828.9	123	2.94148e-10	4.8984e-09	-2.51773	-3.8564	-4.18599	-3.76495	-5.09565	-5.13076
TSNAX	ENSG00000116918.9	124	9.28025e-14	3.43875e-12	-3.66874	-3.76051	-2.90198	-3.1253	-3.62454	-3.36483
CALM3	ENSG00000160014.12	124	1.69028e-09	2.36412e-08	-1.59028	-1.31533	-1.15415	-1.09227	-4.05644	-2.85366
GMPS	ENSG00000163655.11	125	4.23307e-13	1.35087e-11	-2.81713	-4.05007	-2.6271	-1.63745	-1.52849	-3.46429
MED8	ENSG00000159479.12	125	7.13411e-12	1.71677e-10	-1.99432	-3.66823	-2.94449	-2.55883	-2.05108	-4.6394
FIBP	ENSG00000172500.8	127	4.06848e-18	3.29631e-16	-4.55061	-2.6034	-2.51868	-1.26846	-2.9208	-4.36705
TALDO1	ENSG00000177156.6	127	4.64679e-13	1.46792e-11	-3.97459	-4.90816	-1.90203	-3.32	-3.79364	-4.45126
C1orf123	ENSG00000162384.9	129	4.18331e-18	3.35459e-16	-3.90701	-1.89845	-1.17844	-1.69262	-2.35695	-2.58024
MRPS30	ENSG00000112996.5	129	3.83563e-12	9.84856e-11	3.99023	3.26696	2.94999	3.3102	2.27581	-1.26145
PFN1	ENSG00000108518.7	129	7.72364e-12	1.83827e-10	-1.60125	-2.55933	-3.68174	-2.37949	-3.017	-3.25451
DNAJB4	ENSG00000162616.8	130	5.7521e-13	1.78818e-11	-2.30281	-4.23147	-3.01625	-2.4459	-1.22175	-1.68732
C11orf73	ENSG00000149196.11	131	9.46024e-12	2.19155e-10	-2.46269	-2.11729	-2.5227	-1.23009	-1.05784	-4.25373
2019-09-15	ENSG00000183291.11	132	3.91604e-13	1.26258e-11	-4.52877	-2.92403	-1.42698	-2.31923	-4.25685	-4.46008
GHITM	ENSG00000165678.15	134	1.17686e-11	2.6555e-10	-2.59404	-2.66074	-1.36373	-1.10386	-2.65522	-4.27446
PTGES3	ENSG00000110958.11	135	3.73418e-09	4.8138e-08	-2.00013	-1.68973	-1.76856	-1.20185	-3.14972	-2.33563
PCMTD1	ENSG00000168300.9	136	9.19716e-13	2.72896e-11	-2.66428	-4.26681	-1.15038	-2.82146	-2.50816	-3.00042
RARRES3	ENSG00000133321.6	137	9.06337e-08	8.06418e-07	3.21961	1.56452	3.84745	4.17277	-1.9494	3.78006
2019-09-02	ENSG00000168385.13	138	1.09465e-09	1.59228e-08	-2.6948	-3.84323	-3.22145	-1.68288	-3.63322	-3.43815
FDPS	ENSG00000160752.10	139	1.49444e-09	2.11672e-08	-3.30574	-4.15127	-2.12959	-3.98082	-2.94526	-3.70127
MRPL15	ENSG00000137547.4	140	9.01976e-12	2.09572e-10	-2.69682	-4.2566	-1.01575	-3.48837	-3.35395	-5.23241
BAZ2B	ENSG00000123636.13	141	8.17444e-12	1.92796e-10	-3.47751	-2.92713	-3.64346	-2.0505	-2.67809	-1.80839
PSAP	ENSG00000197746.9	144	2.44977e-11	5.19771e-10	-2.36891	-2.44334	-1.3601	-1.2442	-1.65926	-3.37764
GPX4	ENSG00000167468.12	145	2.95214e-16	1.75523e-14	-5.49147	-4.47797	-3.35574	-3.45404	-2.60164	-3.92126
WARS	ENSG00000140105.13	145	2.23722e-11	4.81203e-10	-1.2023	-1.85324	-4.41605	-2.29253	-2.43183	-3.59376
CASP6	ENSG00000138794.5	146	2.19155e-17	1.57199e-15	-4.69031	-2.53376	-1.48937	-1.17741	-1.12036	-1.64086
RNASE4	ENSG00000258818.2	146	1.82338e-13	6.26643e-12	5.15409	5.07994	4.56434	3.93811	2.2507	2.24592
LSM1	ENSG00000175324.5	146	1.40199e-08	1.55261e-07	1.68195	3.40831	2.27035	3.49459	2.05242	2.87459
SFT2D1	ENSG00000198818.5	149	2.4439e-11	5.19229e-10	-1.70538	-2.93153	-3.75419	-1.42195	-2.62591	-3.25951
PDCL3	ENSG00000115539.9	154	2.08911e-16	1.28107e-14	-3.94353	-3.24054	-2.11662	-2.18865	-4.35827	-3.75207
RCOR3	ENSG00000117625.9	154	2.51776e-12	6.68423e-11	-2.07546	-3.7782	-2.32052	-2.13042	-3.12605	-1.91072
YWHAG	ENSG00000170027.5	154	4.75919e-11	9.48019e-10	-2.76327	-1.23915	-2.12716	-1.25227	-1.11901	-3.08926
STAU1	ENSG00000124214.15	155	3.22591e-11	6.66361e-10	-2.64468	-2.32574	-3.15815	-1.49603	-1.84392	-2.55067
C6orf203	ENSG00000130349.5	156	9.11316e-17	6.01277e-15	-3.83266	-2.25854	-1.14296	-1.12547	-1.2966	-3.18933
MZB1	ENSG00000170476.11	157	2.4339e-07	1.9119e-06	1.53195	2.84196	2.14771	3.16167	1.67833	1.15593
MRPL21	ENSG00000197345.8	158	2.82949e-15	1.38698e-13	-3.74077	-4.05236	-3.19377	-3.07059	-3.37795	-3.99559
RAB7L1	ENSG00000117280.8	158	1.70211e-09	2.37557e-08	-1.89747	-1.78571	-1.96427	-2.29477	-1.00382	-1.43397
EFR3A	ENSG00000132294.9	162	1.46692e-16	9.28675e-15	-3.18204	-1.68475	-2.69247	-1.78079	-2.55978	-1.34351
ATP6V1A	ENSG00000114573.5	162	6.59614e-11	1.27338e-09	-2.45151	-2.1287	-1.55764	-1.46441	-1.8571	-3.84554
PHLDA1	ENSG00000139289.9	162	9.90971e-11	1.82518e-09	3.68218	2.39182	1.29214	1.79246	3.41811	3.69461
ENY2	ENSG00000120533.8	164	8.65517e-10	1.29389e-08	-3.25259	-2.57178	-2.11557	-2.81938	-4.06264	-4.4237
TRAM1	ENSG00000067167.3	165	1.10845e-08	1.25966e-07	-1.52645	-1.39856	-2.98253	-1.86106	-3.76476	-2.49754
PNISR	ENSG00000132424.10	168	6.14466e-11	1.19508e-09	-1.43627	-2.63587	-3.84415	-1.0831	-1.32648	-1.50261
FBL	ENSG00000105202.3	168	2.51014e-09	3.34622e-08	-2.73045	-2.23048	-3.00262	-3.25423	-2.95821	-3.93929
PSMC5	ENSG00000087191.8	168	1.21778e-08	1.37292e-07	-1.34907	-1.54727	-1.2229	-2.27441	-3.89237	-3.73893
TUBB	ENSG00000196230.8	169	7.18228e-11	1.36298e-09	-2.00334	-4.1024	-2.15747	-1.2661	-3.72287	-2.36721
PYURF	ENSG00000145337.4	169	9.32204e-11	1.73534e-09	-2.51524	-1.529	-1.77899	-2.47413	-1.24967	-4.92479
SNX3	ENSG00000112335.10	170	1.858e-14	8.11552e-13	-4.17511	-3.88875	-3.88329	-2.19648	-2.54087	-3.64606
PPP2R1A	ENSG00000105568.13	170	5.06855e-11	1.00452e-09	-2.71756	-2.37801	-4.09585	-2.42981	-2.5646	-4.06372
C8orf59	ENSG00000176731.7	172	9.81051e-11	1.81118e-09	-2.53603	-2.31256	-1.29899	-1.49549	-2.40092	-3.65546
MRPS5	ENSG00000144029.7	172	1.2741e-07	1.08514e-06	-2.09944	-2.6216	-1.28669	-2.86235	-1.31772	-3.3693
MRPS9	ENSG00000135972.4	174	4.47753e-16	2.52762e-14	-4.00664	-1.18205	-1.36256	-2.27432	-2.57467	-3.25845
NDUFS2	ENSG00000158864.8	174	1.14717e-10	2.08585e-09	-3.43531	-3.51511	-1.78128	-3.15899	-1.3724	-4.1086
TXNDC17	ENSG00000129235.6	175	7.12324e-11	1.35506e-09	-3.458	-2.06981	-4.89733	-1.57932	-2.95986	-2.97307
RPL7L1	ENSG00000146223.10	176	1.21778e-10	2.20144e-09	-1.63752	-2.36565	-2.81074	-1.68653	-3.36954	-3.80053
ETFB	ENSG00000105379.5	177	3.08159e-13	1.00389e-11	-3.46345	-2.80436	-3.9336	-2.64112	-4.07189	-5.17263
HNRNPUL1	ENSG00000105323.12	179	1.0424e-11	2.38652e-10	-1.39373	-2.92862	-1.90692	-1.71175	-2.20987	-2.36704
CCT4	ENSG00000115484.10	182	1.70441e-08	1.84954e-07	-2.45087	-1.95042	-3.38606	-2.17238	-3.6163	-2.69509
PPA2	ENSG00000138777.15	183	8.69366e-16	4.67157e-14	-5.16896	-2.63485	-2.43913	-1.49954	-3.46034	-4.6881
PRPF40A	ENSG00000196504.11	184	4.19949e-09	5.36498e-08	-3.1484	-3.1675	-2.69143	-2.08994	-3.68642	-2.86536
SLC7A2	ENSG00000003989.12	184	6.69854e-08	6.13621e-07	2.47155	2.48624	2.61904	2.44036	1.21302	-1.61169
ASAP1	ENSG00000153317.10	186	1.30411e-15	6.8202e-14	-3.02182	-2.45349	-2.61669	-2.01669	-2.33732	-2.33481
PCMT1	ENSG00000120265.12	187	1.32169e-15	6.8891e-14	-5.56033	-2.28003	-3.3746	-1.19013	-2.14055	-3.33659
SSB	ENSG00000138385.11	188	1.64783e-10	2.88223e-09	-3.30565	-2.18884	-1.98583	-2.32386	-3.28359	-3.86672
SEPW1	ENSG00000178980.10	188	4.25433e-10	6.83709e-09	-2.62984	-4.06625	-1.98153	-3.34188	-3.11349	-3.55555
PDP1	ENSG00000164951.11	191	2.02505e-11	4.40702e-10	-2.28711	-3.79208	-2.72997	-1.55534	-1.83603	-2.40817
RNF114	ENSG00000124226.7	192	2.15931e-11	4.68311e-10	-2.07239	-3.51045	-3.19757	-1.72597	-2.58288	-2.73244
SHMT2	ENSG00000182199.6	197	2.55648e-15	1.26106e-13	-3.47631	-1.76867	-3.05082	-2.0859	-3.01304	-4.56943
MBD4	ENSG00000129071.5	197	2.51069e-11	5.30696e-10	-1.51452	-3.64887	-1.05762	-1.20448	-2.5077	-2.20169
HN1L	ENSG00000206053.8	201	3.36708e-11	6.90958e-10	-2.59348	-3.38885	-1.58453	-1.34921	-2.08969	-3.18506
COPS6	ENSG00000168090.5	203	2.60297e-10	4.3908e-09	-1.78952	-2.62114	-1.38802	-1.84155	-1.54568	-4.27381
MAPT	ENSG00000186868.11	203	3.22294e-08	3.20796e-07	1.00692	1.6327	2.11889	1.79159	2.21781	-1.31343
RNF187	ENSG00000168159.9	204	3.02889e-09	3.95231e-08	-2.58292	-2.56111	-3.6881	-3.21436	-2.09869	-3.98426
MRPS7	ENSG00000125445.6	205	2.8021e-10	4.69629e-09	-1.71762	-1.40659	-1.63057	-1.44428	-1.61014	-3.85668
CNN3	ENSG00000117519.11	206	2.85135e-10	4.76352e-09	-1.90408	-1.23074	-1.06456	-1.89013	1.04992	3.30886
FUBP1	ENSG00000162613.12	207	3.46775e-08	3.41684e-07	-1.82529	-2.47413	-2.3634	-1.10603	-3.4425	-2.07347
MAST4	ENSG00000069020.14	207	1.34067e-06	8.54279e-06	2.17656	1.7552	1.82414	2.46778	1.97272	-2.07516
AFF3	ENSG00000144218.14	209	7.07014e-09	8.46522e-08	-2.6551	1.98699	2.11529	2.04147	-1.30599	-3.28142
CAMK2N1	ENSG00000162545.5	211	8.48316e-15	3.90758e-13	-3.62467	1.02544	-1.69503	1.25027	-1.1708	-1.71988
CD37	ENSG00000104894.7	212	6.05983e-11	1.18004e-09	-3.31203	-3.81276	-1.3356	-1.2593	-2.97185	1.11904
NAA50	ENSG00000121579.8	214	6.69175e-11	1.29025e-09	-1.02049	-3.47273	-2.66735	-1.39048	-2.8823	-3.74997
AGO2	ENSG00000123908.7	214	5.04505e-10	7.94456e-09	-1.9205	-1.47703	-3.4012	-1.33252	-2.14119	-2.17892
PREX1	ENSG00000124126.9	214	1.52564e-06	9.55788e-06	1.84242	1.44556	1.47342	1.90698	1.54701	1.49254
C9orf78	ENSG00000136819.10	215	3.49143e-10	5.71082e-09	-3.07658	-1.33237	-1.34599	-1.10544	-2.75826	-4.52278
TOPORS	ENSG00000197579.3	217	7.11783e-11	1.35506e-09	-1.64038	-3.53025	-1.45163	-1.26264	-2.44053	-2.10882
TMEM261	ENSG00000137038.7	219	1.75918e-13	6.08616e-12	-3.0491	-3.14018	-2.30551	-2.53094	-3.4879	-3.73624
RABGGTB	ENSG00000137955.11	219	4.11627e-10	6.63569e-09	-2.16057	-2.5929	-1.73608	-1.2988	-3.88502	-4.17669
CIR1	ENSG00000138433.11	219	4.96149e-08	4.67366e-07	-1.73456	-1.18641	-2.04642	-1.09799	-2.99499	-1.30527
IRF2BP2	ENSG00000168264.6	222	8.64458e-11	1.61887e-09	-3.15882	-3.96086	-2.51862	-2.32772	-3.08696	-2.33303
RHOQ	ENSG00000119729.6	222	7.89338e-10	1.1914e-08	-1.61756	-1.40829	-3.31776	-2.38856	-1.31665	-2.49136
PIP	ENSG00000159763.3	223	2.22684e-12	6.00365e-11	-6.38069	2.09202	4.09273	3.88338	1.88112	3.59587
EIF3M	ENSG00000149100.8	225	5.36116e-10	8.40004e-09	-2.22818	-1.94499	-1.15702	-1.24577	-1.88243	-3.80985
GFRA1	ENSG00000151892.10	226	1.63654e-07	1.34758e-06	2.10694	2.42431	2.59507	2.43444	2.10859	2.5966
FAM91A1	ENSG00000176853.11	229	1.0654e-09	1.55844e-08	-2.13018	-2.83339	-2.98668	-1.86676	-3.07001	-3.71885
AHCTF1	ENSG00000153207.10	230	1.1229e-10	2.04648e-09	-2.27814	-3.47964	-2.18639	-2.26008	-2.67727	-1.35609
RPL22L1	ENSG00000163584.13	232	7.47206e-10	1.13327e-08	-1.11994	-2.97502	1.28191	-1.71694	-1.26357	-4.78812
DCTN6	ENSG00000104671.3	233	2.69427e-14	1.10869e-12	-3.99947	-2.2997	-2.24271	-1.38591	-2.38556	-2.98331
CFL1	ENSG00000172757.8	233	2.6876e-11	5.64866e-10	-3.34949	-3.02399	-2.3213	-1.33664	-2.7026	-2.54347
DENND1B	ENSG00000213047.7	233	2.13667e-10	3.63559e-09	-2.53004	-2.55758	-1.69293	-2.48964	-1.70227	-2.3118
ATG5	ENSG00000057663.8	233	1.13676e-09	1.64893e-08	-2.0375	-2.06769	-3.02869	-1.11636	-1.59621	-2.54761
ATF7IP	ENSG00000171681.8	235	3.1838e-14	1.29987e-12	-3.66681	-3.24184	-2.83353	-1.65352	-3.7479	-1.89116
PARP1	ENSG00000143799.8	238	2.18012e-11	4.72167e-10	-3.43161	-3.33929	-2.4743	-2.83408	-3.57936	-1.58148
FAM136A	ENSG00000035141.3	239	4.3562e-14	1.7373e-12	-3.97669	-1.32867	-3.36926	-2.44878	-3.47213	-3.76486
HMGN3	ENSG00000118418.10	239	1.64823e-09	2.31359e-08	-2.92678	-2.27531	-4.12546	-1.53508	-2.591	-3.15704
NONO	ENSG00000147140.11	241	9.83918e-08	8.6679e-07	-2.76446	-2.96634	-1.77847	-2.1404	-3.27553	-2.1174
FH	ENSG00000091483.6	244	2.06818e-10	3.53058e-09	-1.69694	-3.70956	-1.46139	-1.83567	-2.48187	-3.28237
CAP1	ENSG00000131236.12	245	6.21785e-14	2.38891e-12	-4.65063	-3.42062	-1.71361	-1.04356	-2.64309	-2.39147
EIF4A1	ENSG00000161960.10	245	1.06657e-07	9.28103e-07	-1.29522	-1.83679	-2.30996	-1.53283	-3.55672	-2.97602
STX6	ENSG00000135823.9	246	6.80366e-07	4.6826e-06	-1.48286	-1.75121	-1.9269	-2.10497	-1.1476	-1.1827
TMPO	ENSG00000120802.9	247	1.11208e-07	9.61816e-07	-1.85906	-2.03965	-2.37033	-1.4201	-4.02474	-1.91127
GMNN	ENSG00000112312.5	250	4.88638e-13	1.5343e-11	-3.85919	-3.72814	-2.50359	-1.28803	-3.94454	-3.95018
ACADM	ENSG00000117054.9	252	1.21004e-09	1.7439e-08	-2.5284	-3.18064	-1.38901	-1.24258	-1.198	-4.51781
COMMD7	ENSG00000149600.7	253	1.09378e-13	3.98683e-12	-3.80701	-1.60216	-3.15491	-2.18242	-1.52655	-2.5522
C14orf166	ENSG00000087302.4	253	1.27292e-07	1.08472e-06	-1.43466	-1.35315	-1.24922	-1.66191	-3.19001	-2.86316
RALA	ENSG00000006451.3	255	1.25569e-09	1.8014e-08	-1.78061	-2.13074	-1.55912	-1.91674	-1.59545	-4.04457
TRIM28	ENSG00000130726.7	255	1.1901e-08	1.34559e-07	-2.44778	-2.42247	-3.00689	-1.71879	-3.26004	-2.12429
HNRNPK	ENSG00000165119.14	260	1.35293e-07	1.14355e-06	-1.74866	-2.1186	-2.43904	-1.57005	-2.78045	-2.27611
RNF130	ENSG00000113269.9	261	3.04711e-09	3.97063e-08	-1.46069	-1.83826	-2.85163	-1.71292	-1.08814	-2.91075
RCHY1	ENSG00000163743.9	263	1.75563e-09	2.43808e-08	-2.74225	-1.74263	-1.92144	-1.03796	-1.57971	-4.95581
MUM1	ENSG00000160953.10	266	2.92005e-13	9.61188e-12	-3.17464	-2.7767	-3.1739	-2.24265	-1.98182	-1.4487
DARS	ENSG00000115866.6	268	3.33646e-06	1.89487e-05	-2.53291	-1.92687	-2.58905	-2.80702	-2.86606	-3.02671
ZHX2	ENSG00000178764.6	273	7.10765e-10	1.08115e-08	-1.40225	-2.7056	-2.51769	-1.86697	-2.33249	-2.46044
ANKRD17	ENSG00000132466.13	274	2.80581e-13	9.29544e-12	-3.54685	-1.58702	-2.3792	-1.83337	-2.48172	-2.47394
EIF2AK1	ENSG00000086232.8	275	8.39715e-08	7.542e-07	-2.65454	-2.24781	-1.30743	-2.5913	-2.12199	-2.91369
UBE2K	ENSG00000078140.9	276	2.92592e-13	9.61188e-12	-3.91306	-2.19763	-2.7673	-1.06706	-2.79998	-3.81956
CCNG2	ENSG00000138764.9	277	3.0697e-13	1.00211e-11	-3.40563	-1.64741	-1.95578	-1.15831	-2.13119	-3.20911
MRPL55	ENSG00000162910.14	279	1.86611e-09	2.57869e-08	-4.13328	-4.07779	-1.80748	-3.40375	-4.10944	-1.96402
RUSC1	ENSG00000160753.11	280	8.72288e-10	1.29905e-08	-1.4369	-3.15782	-1.52195	-1.08246	-1.19506	-1.36251
PPIG	ENSG00000138398.11	284	2.549e-09	3.39513e-08	-3.35059	-3.40955	-3.22998	-2.80656	-3.49118	-2.535
DDB1	ENSG00000167986.9	285	1.95459e-09	2.68812e-08	-2.79721	-3.34631	-3.15569	-1.60383	-2.70821	-1.95641
NDUFS1	ENSG00000023228.9	287	6.54404e-13	2.01435e-11	-3.20639	-1.56166	-1.56041	-2.30877	-3.4786	-3.67331
PABPC4	ENSG00000090621.9	288	1.36226e-09	1.94307e-08	-2.29182	-3.83529	-1.70415	-1.02565	-3.78385	-2.39375
RNF167	ENSG00000108523.11	288	6.67584e-09	8.06101e-08	-1.30374	-1.27318	-3.18231	-1.36977	-1.49729	-3.34674
AAMDC	ENSG00000087884.10	291	3.12636e-10	5.16522e-09	4.51353	4.2958	4.45639	3.5656	2.62603	3.85627
UBE2L6	ENSG00000156587.11	292	1.97542e-06	1.19727e-05	3.58399	3.17303	2.75807	3.7436	1.04644	3.2723
FAM127B	ENSG00000203950.6	293	2.51636e-11	5.31017e-10	-3.78435	-2.58157	-2.33278	-2.06212	-4.07843	-1.1101
ASF1A	ENSG00000111875.7	294	1.23221e-10	2.22494e-09	-2.77881	-3.228	-2.17332	-1.35455	-1.63911	-2.35899
DNTTIP2	ENSG00000067334.9	295	2.41238e-07	1.89945e-06	-2.39852	-2.83211	-1.57917	-1.13286	-3.43098	-2.35056
HIST2H4B	ENSG00000182217.7	297	2.42885e-07	1.91046e-06	-1.45115	-1.42662	1.41619	-1.19134	-3.39847	-1.11199
CNPPD1	ENSG00000115649.11	300	1.06472e-12	3.12951e-11	-2.44546	-2.22675	-1.72895	-1.7223	-1.79091	-3.30398
PNKD	ENSG00000127838.9	303	3.31134e-11	6.82205e-10	-4.22172	-2.50693	-1.5525	-1.8395	-1.36935	-3.65641
ORMDL1	ENSG00000128699.9	304	1.28888e-12	3.69124e-11	-3.99989	-2.4968	-1.39576	-1.42344	-2.94206	-3.78777
TPM3	ENSG00000143549.15	304	1.60258e-09	2.26169e-08	-1.61215	-3.46995	-2.01756	-1.3606	-2.84391	-1.31941
SMARCA2	ENSG00000080503.15	304	2.05241e-09	2.80257e-08	-2.5628	-3.27534	-1.15922	-1.14885	-3.16201	-3.79985
ARPC5	ENSG00000162704.11	305	1.61874e-09	2.27833e-08	-1.84145	-3.85965	-1.83429	-2.39135	-1.89081	-2.90933
SUMO1	ENSG00000116030.12	306	1.47964e-10	2.61142e-09	-3.66945	-3.05821	-2.17894	-1.79886	-2.9322	-3.2236
PLEKHB2	ENSG00000115762.12	307	1.70129e-09	2.37557e-08	-2.82195	-3.7527	-2.75374	-1.4582	-3.31286	-4.38224
CNIH4	ENSG00000143771.7	307	2.77062e-07	2.14264e-06	-1.7313	-2.36301	-1.21745	-1.9023	-3.43502	-2.33582
PHF10	ENSG00000130024.10	309	1.23367e-08	1.38981e-07	-1.38938	-1.34319	-2.73126	-1.19978	-1.71376	-1.62901
PSIP1	ENSG00000164985.10	311	1.63643e-12	4.58582e-11	-2.75917	-2.74322	-1.68659	-1.45115	-2.35072	-1.05914
ZCCHC6	ENSG00000083223.13	312	1.97689e-09	2.71402e-08	-1.36853	-3.17419	-1.24705	-1.14729	-2.52926	-2.11913
HMCES	ENSG00000183624.9	314	2.17469e-09	2.94422e-08	-1.41761	-3.31397	-1.04903	-1.60052	-2.64493	-1.15318
GSTM3	ENSG00000134202.6	315	1.39021e-08	1.54285e-07	2.40307	3.91928	4.08234	1.88286	-4.48008	-2.55477
CSPP1	ENSG00000104218.9	315	1.38676e-07	1.16773e-06	-1.86798	-2.31088	-2.4121	-1.67352	-3.27716	-1.16389
RCC2	ENSG00000179051.9	321	2.38843e-12	6.39519e-11	-2.65939	-1.84616	-2.32725	-1.63148	-2.46189	-2.13413
IRF2	ENSG00000168310.6	323	1.77062e-08	1.91607e-07	-1.8099	-1.86895	-2.49092	-1.45189	-1.71787	-2.46936
TCEAL8	ENSG00000180964.12	325	3.81764e-07	2.83863e-06	-1.65537	-1.78779	-1.79241	-1.60911	2.64114	-1.35961
HIST2H4A	ENSG00000183941.8	327	3.89977e-07	2.89282e-06	-1.43422	-1.43178	1.40173	-1.08472	-3.37936	-1.03746
C14orf182	ENSG00000214900.4	327	4.47599e-07	3.26146e-06	2.69302	3.21378	3.39001	2.97822	1.80146	3.44252
PDE4B	ENSG00000184588.13	328	1.0945e-09	1.59228e-08	-2.39459	-3.31449	-1.84344	-2.20833	-1.61587	-4.69044
XPO1	ENSG00000082898.12	328	1.86074e-08	2.00389e-07	-1.97799	-2.53358	-3.23403	-1.06427	-2.56991	-1.22836
FAM134A	ENSG00000144567.6	328	8.06964e-07	5.43666e-06	-2.34643	-1.90899	-1.25189	-2.59771	-2.24011	-3.32702
TXNDC9	ENSG00000115514.7	329	3.28005e-12	8.56264e-11	-3.83003	-2.09717	-2.07787	-2.09485	-1.88223	-3.61963
PEX13	ENSG00000162928.8	330	6.63038e-09	8.0185e-08	-1.71776	-3.30948	-3.28979	-2.12283	-1.64266	-1.50767
RPS12	ENSG00000112306.7	331	2.35763e-09	3.16448e-08	-2.31351	-1.38721	-1.13824	-1.24063	-1.09272	-2.34888
PPP2CB	ENSG00000104695.8	332	7.82078e-11	1.47697e-09	-3.00502	-1.87708	-2.15204	-1.09373	-3.2469	-1.60731
GABARAP	ENSG00000170296.5	336	7.86263e-09	9.29312e-08	-1.88129	-2.41136	-1.49794	-2.13833	-2.42653	-3.50532
PSMC4	ENSG00000013275.3	337	2.54702e-07	1.98642e-06	-2.34608	-2.36934	-1.10223	-1.84415	-3.40761	-3.37581
NUP133	ENSG00000069248.9	338	4.21739e-12	1.07057e-10	-2.7518	-2.45977	-1.29297	-1.45331	-2.38321	-1.26136
COG2	ENSG00000135775.9	342	1.72737e-09	2.4031e-08	-2.40103	-1.8711	-1.34707	-1.4504	-3.1852	-2.19012
CSNK2A1	ENSG00000101266.12	343	2.59171e-08	2.65922e-07	-3.05153	-2.57516	-3.4414	-2.0085	-1.60594	-1.78553
BANF1	ENSG00000175334.3	344	6.87708e-11	1.31785e-09	-3.83226	-3.064	-2.69828	-2.50294	-2.6773	-3.45028
PPM1K	ENSG00000163644.10	346	8.94935e-09	1.04045e-07	-1.17704	-1.16997	-1.18381	-1.37448	-1.07427	-4.67532
KIF5B	ENSG00000170759.10	347	5.59829e-09	6.90382e-08	-1.77266	-2.35121	-1.51529	-1.41933	-1.23613	-1.24596
CYP4B1	ENSG00000142973.8	347	7.10115e-06	3.7287e-05	2.70326	2.42867	2.42487	2.69119	-1.45732	2.7998
LAP3	ENSG00000002549.8	351	6.40999e-07	4.45085e-06	-2.21244	-1.97584	-2.10914	-2.404	-3.28219	-3.07953
DCUN1D5	ENSG00000137692.7	354	6.93622e-12	1.67638e-10	-2.29364	-1.97603	-1.95358	-1.31199	-1.47475	-2.60213
PSMG3	ENSG00000157778.4	354	1.58192e-08	1.7359e-07	-3.52121	-2.75838	-1.11976	-3.4206	-1.46604	-4.70385
HECA	ENSG00000112406.4	355	7.42425e-12	1.77784e-10	-3.76148	-3.02917	-2.69621	-1.36823	-2.84199	-1.72305
CRIPT	ENSG00000119878.5	357	7.50431e-12	1.79152e-10	-2.96886	-1.23661	-1.13671	-1.35259	-1.25718	-1.58031
UMPS	ENSG00000114491.9	357	3.47202e-10	5.69696e-09	-2.70582	-3.16177	-1.26574	-1.27431	-1.31059	-3.63942
PLP2	ENSG00000102007.6	357	4.58603e-07	3.32924e-06	-3.0875	-1.56586	-1.66615	-2.23289	-3.71523	-3.52384
RAP1A	ENSG00000116473.10	357	1.36184e-06	8.66714e-06	-1.67357	-2.12645	-1.35038	-2.12433	-3.84916	-2.60291
SIKE1	ENSG00000052723.7	359	7.79253e-07	5.26358e-06	-1.73168	-2.55618	-1.25109	-1.14982	-3.65563	-2.78756
NUP62	ENSG00000213024.6	360	3.70411e-08	3.62688e-07	-2.07146	-1.89933	-2.58122	-1.37415	-1.72806	-2.2919
PSMC2	ENSG00000161057.6	364	1.39354e-08	1.54544e-07	-2.97688	-2.71036	-2.17927	-1.05224	-3.49179	-4.441
SPAG7	ENSG00000091640.3	365	1.23454e-08	1.38981e-07	-2.3192	-1.53652	-2.89036	-1.72952	-2.64278	-4.78381
PRKRA	ENSG00000180228.8	365	2.90992e-08	2.93375e-07	-2.92383	-2.16443	-1.70463	-1.35329	-3.81411	-2.37131
STEAP4	ENSG00000127954.8	367	7.35518e-07	5.00914e-06	2.70737	1.95819	2.78079	2.41463	2.74778	-1.08455
CDK4	ENSG00000135446.12	368	1.03612e-11	2.37563e-10	-3.58971	-2.9103	-2.7446	-2.26974	-1.92454	-3.07205
SLC1A2	ENSG00000110436.7	370	7.17576e-06	3.75904e-05	2.19189	2.05695	2.37098	2.28769	2.27983	2.38342
EPRS	ENSG00000136628.13	371	1.51803e-08	1.67376e-07	-2.57445	-3.25738	-2.10392	-2.4578	-1.73689	-3.38783
ODC1	ENSG00000115758.8	374	2.55225e-10	4.30989e-09	-2.55661	-2.09175	-2.19356	-1.94634	-2.80255	-2.81285
KIAA0196	ENSG00000164961.11	374	1.6002e-08	1.75472e-07	-1.49311	-1.08514	-1.59582	-1.15448	-3.4063	-4.07267
ZNF468	ENSG00000204604.5	374	5.00519e-08	4.70633e-07	-1.79153	-2.23716	-2.35563	-1.02974	-1.03104	-2.68324
NSL1	ENSG00000117697.10	375	1.5151e-11	3.36147e-10	-2.8277	-2.56406	-1.68885	-1.75164	-3.07991	-1.89967
UBE2V1	ENSG00000244687.7	375	1.63463e-08	1.79121e-07	-2.68617	-2.45223	-2.17731	-1.00734	-2.11084	-3.21602
CPSF3	ENSG00000119203.9	378	4.96562e-09	6.22674e-08	-2.7645	-2.08771	-3.07503	-2.17067	-1.83083	-2.78543
SCUBE3	ENSG00000146197.7	378	3.30574e-08	3.27786e-07	2.34509	3.37649	3.1601	2.67939	1.06952	3.11505
MOB4	ENSG00000115540.10	379	1.83216e-11	4.01816e-10	-3.98728	-1.88871	-2.2318	-1.60879	-3.09011	-3.01009
RSU1	ENSG00000148484.13	379	5.24754e-07	3.72473e-06	-1.9617	-2.5562	-2.09547	-1.93629	-3.3936	-1.89677
PA2G4	ENSG00000170515.9	381	1.67211e-08	1.82208e-07	-2.71812	-1.24346	-1.37331	-1.11462	-2.78255	-3.54843
UBR5	ENSG00000104517.8	382	1.12621e-06	7.31032e-06	-1.13061	-1.56079	-1.01882	-1.33568	-3.45231	-2.79069
PHF20	ENSG00000025293.11	383	2.02638e-11	4.40702e-10	-3.65197	-2.94763	-2.65389	-1.53283	-3.07779	-2.25592
SAE1	ENSG00000142230.7	383	5.75233e-07	4.04266e-06	-2.10664	-2.48884	-2.19263	-1.36861	-3.84753	-3.8338
CLTA	ENSG00000122705.12	384	4.28838e-05	0.000182172	-1.69862	-1.05268	-1.63687	-2.84414	-1.10536	-1.40951
PGAM1	ENSG00000171314.8	385	4.35133e-08	4.18204e-07	-3.19121	-3.43934	-1.67025	-1.54099	-3.55177	-3.27141
ZNF766	ENSG00000196214.6	385	5.83261e-08	5.41594e-07	-1.7224	-1.77403	-3.25146	-1.36521	-1.40786	-2.37981
ZC3H15	ENSG00000065548.13	386	1.96183e-08	2.10958e-07	-2.69034	-2.70094	-2.49045	-2.40817	-1.52169	-3.14317
MRPL16	ENSG00000166902.4	387	1.15329e-10	2.09453e-09	-2.75427	-3.07586	-1.18219	-1.48492	-1.29673	-2.84218
ANP32B	ENSG00000136938.8	387	7.95432e-07	5.36359e-06	-1.89489	-2.25159	-1.5736	-2.33141	-2.06316	-3.02154
RQCD1	ENSG00000144580.9	388	2.26292e-11	4.86062e-10	-4.0347	-1.81979	-1.42362	-1.75351	-2.09141	-3.11883
UBE2F	ENSG00000184182.14	389	2.12524e-08	2.26071e-07	-2.23494	-1.20226	-1.57904	-1.29281	-2.6316	-4.07767
LITAF	ENSG00000189067.8	390	2.16068e-08	2.28906e-07	-2.40479	-3.27867	-2.47472	-1.85013	-2.69924	-3.37746
RNF139	ENSG00000170881.4	392	2.19509e-08	2.3208e-07	-1.04348	-2.99357	-1.71203	-1.55111	-3.40427	-4.11638
DDX18	ENSG00000088205.8	393	7.34377e-08	6.6842e-07	-1.54365	-1.58698	-2.50673	-1.27017	-2.77813	-1.41306
TAGLN2	ENSG00000158710.10	394	1.29065e-08	1.44777e-07	-2.56234	-3.80232	-1.72427	-2.18491	-2.13924	-2.50166
C4orf3	ENSG00000164096.10	394	3.72946e-08	3.64157e-07	-2.74573	-1.60884	-3.06806	-1.98082	-1.52866	-2.35628
ARID4B	ENSG00000054267.16	395	1.32348e-08	1.47928e-07	-1.66537	-3.00242	-2.41793	-1.23812	-2.20109	-1.47251
RSF1	ENSG00000048649.9	396	7.91787e-08	7.16503e-07	2.00974	1.81466	3.02521	2.2851	2.99403	2.10801
ATRX	ENSG00000085224.16	398	1.44366e-06	9.13207e-06	-1.8515	-1.83069	-1.58873	-1.15315	-2.69009	-1.40582
FOSL2	ENSG00000075426.7	402	3.15325e-11	6.54546e-10	2.80772	1.55521	1.091	1.38097	1.76638	1.97871
RAB4A	ENSG00000168118.7	403	3.22163e-11	6.66361e-10	-2.74136	-2.34764	-1.89022	-1.80552	-1.22086	-3.39668
MFF	ENSG00000168958.15	403	2.40527e-08	2.49411e-07	-2.12003	-2.64783	-1.39638	-2.00937	-1.25584	-4.63971
DNAJC10	ENSG00000077232.12	407	1.5673e-06	9.77069e-06	-1.4836	-1.34974	-1.66864	-1.14926	-3.15899	-2.85553
DYNC1I2	ENSG00000077380.11	408	1.70302e-09	2.37557e-08	-3.12073	-1.69812	-1.9746	-2.22989	-1.9757	-2.6342
TMC4	ENSG00000167608.7	410	4.80236e-11	9.55401e-10	3.43705	1.87523	1.79254	2.48796	3.16339	1.46916
OSGIN2	ENSG00000164823.5	412	9.39496e-08	8.31874e-07	-1.45706	-1.66653	-2.41027	-1.15755	-3.02996	-2.92335
NDUFAF4	ENSG00000123545.5	413	9.85498e-10	1.45106e-08	-2.85626	-2.04095	-2.97616	-2.1346	-2.05235	-4.61181
MRPS18C	ENSG00000163319.6	416	2.17007e-09	2.94305e-08	-3.29892	-2.43953	-2.53018	-2.34078	-2.66664	-3.97792
PSMB1	ENSG00000008018.8	417	1.25224e-10	2.2559e-09	-4.11132	-3.6485	-3.10472	-2.67945	-2.73326	-3.42193
CCT3	ENSG00000163468.10	417	2.36038e-07	1.8641e-06	-1.64287	-2.55556	-1.87877	-2.47811	-3.08844	-3.2876
SUSD4	ENSG00000143502.10	418	8.99771e-07	5.98457e-06	1.20703	1.7203	1.50513	1.27661	2.38734	2.38734
GCC2	ENSG00000135968.15	419	9.89484e-08	8.69711e-07	-2.03761	-2.85181	-3.16028	-1.14848	-2.65521	-2.65785
ANGEL2	ENSG00000174606.8	421	2.36359e-08	2.46068e-07	-2.29686	-3.16779	-1.40082	-1.62304	-1.75406	-2.05106
EVA1B	ENSG00000142694.6	422	3.79527e-06	2.12484e-05	1.66121	1.2751	1.66121	1.51885	1.42745	1.11429
AC090186.1	ENSG00000232941.1	423	5.8803e-11	1.15226e-09	-5.02822	-2.9293	2.04411	-1.80588	-2.86765	-3.14299
C8orf76	ENSG00000189376.7	425	3.85132e-08	3.74755e-07	-1.9167	-1.59477	-2.06402	-1.23953	-1.99079	-3.98739
PTOV1	ENSG00000104960.11	425	1.08372e-07	9.39881e-07	-1.73632	-2.04444	-3.19821	-1.6846	-1.57031	-2.7383
NCBP2	ENSG00000114503.6	427	3.87961e-08	3.76804e-07	-2.23845	-2.2656	-1.82204	-1.54829	-2.27471	-3.53774
CNOT7	ENSG00000198791.7	428	6.75347e-11	1.29894e-09	-4.04858	-2.06061	-2.16732	-1.09	-2.65015	-2.4555
EIF3D	ENSG00000100353.13	432	4.19793e-07	3.09054e-06	-1.50258	-1.51377	-1.64474	-2.56659	-2.08548	-3.06187
CPSF7	ENSG00000149532.11	435	1.71052e-09	2.3839e-08	-1.63921	-1.97187	-1.74126	-1.4526	-1.88392	-2.30371
DMTF1	ENSG00000135164.14	435	9.29908e-07	6.16143e-06	-2.63835	-2.02263	-1.91627	-2.56727	-2.05726	-3.57481
SNRPD2	ENSG00000125743.6	437	4.37328e-08	4.19794e-07	-3.83001	-2.25995	-1.78519	-2.77166	-3.28148	-3.5067
TES	ENSG00000135269.13	438	3.06365e-08	3.06698e-07	-2.36066	-3.50256	-3.13115	-2.55291	1.20505	-2.80651
CCDC93	ENSG00000125633.6	438	6.28933e-08	5.79189e-07	-1.71425	-1.77805	-2.46981	-1.57557	-3.02939	-1.14173
YWHAH	ENSG00000128245.10	441	3.13297e-08	3.12837e-07	-1.96183	-3.45207	-1.22554	-1.58763	-3.07173	-3.78169
SEC63	ENSG00000025796.9	442	4.76513e-08	4.51316e-07	-2.87456	-3.34705	-3.22939	-1.55136	-1.11966	-1.57025
TIPRL	ENSG00000143155.8	447	3.79189e-06	2.12371e-05	-1.48552	-3.0468	-1.53328	-2.63165	-2.49269	-2.42201
CPE	ENSG00000109472.9	448	1.13245e-10	2.06149e-09	3.50776	1.55567	-1.8851	2.23793	2.54966	-2.24701
HNRNPD	ENSG00000138668.14	449	1.4332e-07	1.2023e-06	-2.40281	-2.92024	-3.21783	-1.49352	-1.78353	-1.75194
ARF1	ENSG00000143761.9	450	1.75607e-08	1.90164e-07	-3.07636	-3.09416	-2.25454	-1.96273	-2.35043	-2.44757
PRAME	ENSG00000185686.13	452	2.72281e-08	2.77011e-07	3.33664	2.47678	3.1087	1.49869	2.32332	3.26349
USP33	ENSG00000077254.10	453	7.43223e-08	6.75293e-07	-2.61537	-2.09999	-3.04297	-1.59027	-2.48923	-1.84717
THRSP	ENSG00000151365.2	454	3.74251e-06	2.10056e-05	-3.10027	2.71077	3.2138	2.8297	2.97744	2.77754
LAMTOR5	ENSG00000134248.9	456	1.50244e-06	9.4428e-06	-2.5985	-1.76141	-1.91623	-1.54475	-3.28522	-3.17484
SYNCRIP	ENSG00000135316.13	457	6.54367e-09	7.93205e-08	-2.88371	-2.82885	-2.89764	-1.76625	-2.25389	-2.19263
C16orf13	ENSG00000130731.11	463	1.83548e-10	3.17494e-09	-2.88612	-1.44859	-1.53492	-1.59702	-1.91157	-2.67666
HMOX2	ENSG00000103415.7	469	5.98929e-09	7.34546e-08	-2.9855	-2.53496	-1.4299	-1.98485	-3.50072	-4.50132
ENOPH1	ENSG00000145293.10	470	1.94871e-07	1.57153e-06	-1.95607	-1.71619	-2.92763	-1.19127	-1.81909	-2.20125
TANK	ENSG00000136560.9	473	2.02301e-07	1.62308e-06	-1.86354	-1.97971	-3.5296	-1.2698	-2.08605	-1.04622
CNST	ENSG00000162852.9	474	4.84224e-08	4.57511e-07	-1.11754	-2.8951	-1.82805	-1.05569	-2.55916	-1.9136
PLRG1	ENSG00000171566.7	475	4.25473e-06	2.35092e-05	-1.26241	-1.26663	-1.46633	-2.46926	-2.19841	-3.6795
ZNF460	ENSG00000197714.4	478	5.43926e-08	5.07784e-07	-1.61987	-2.41558	-2.03036	-1.24511	-2.12827	-2.70953
HIPK3	ENSG00000110422.7	479	1.97388e-08	2.11905e-07	-2.19489	-2.45357	-1.28931	-1.68205	-1.71714	-3.0074
UNC50	ENSG00000115446.7	479	1.03026e-07	9.00514e-07	-2.89283	-2.26439	-1.96106	-2.40142	-1.5593	-2.44262
HLA-DRA	ENSG00000204287.9	480	9.25113e-08	8.20532e-07	3.84549	-2.16212	-2.83986	1.24639	-1.5868	4.43502
ZNF7	ENSG00000147789.11	481	3.12429e-10	5.16522e-09	-3.26063	-1.82458	-2.81534	-1.34555	-2.431	-3.54853
DEDD	ENSG00000158796.12	486	6.23264e-08	5.74645e-07	-1.91218	-3.52301	-1.25752	-1.79931	-1.33099	-2.31098
EIF2S2	ENSG00000125977.6	488	2.47174e-07	1.93834e-06	-1.84117	-1.47679	-2.27881	-1.25692	-1.68007	-2.37729
PSMA7	ENSG00000101182.10	488	2.42146e-06	1.43046e-05	-2.32208	-2.24728	-1.97524	-1.78151	-2.35182	-2.05574
INTS4	ENSG00000149262.12	489	2.50724e-07	1.96108e-06	2.02363	1.77932	3.07057	1.50001	1.58734	2.51106
NDUFS8	ENSG00000110717.6	492	5.92178e-10	9.12304e-09	-3.65595	-3.19105	-1.18881	-1.89896	-2.70437	-3.89933
TSN	ENSG00000211460.7	492	2.68886e-07	2.0856e-06	-1.59867	-2.11086	-3.41622	-1.54492	-2.48793	-2.32611
LYRM2	ENSG00000083099.6	493	1.05354e-07	9.19835e-07	-2.92509	-2.74097	-2.55484	-1.28331	-1.29568	-4.02135
ARID5B	ENSG00000150347.10	499	4.60371e-10	7.33077e-09	-3.44212	-2.20802	-2.16147	-1.24329	-3.19022	1.48003
CSE1L	ENSG00000124207.12	501	4.77526e-10	7.58078e-09	-3.2247	-2.43214	-2.68659	-1.71839	-2.74707	-3.10701
CMPK1	ENSG00000162368.9	501	8.36297e-08	7.51562e-07	-2.30898	-2.9795	-1.47037	-2.17916	-1.5184	-3.30534
RNF20	ENSG00000155827.7	502	4.89509e-10	7.74266e-09	-2.22473	-1.63059	-1.25581	-1.672	-1.41732	-1.56769
ALKBH5	ENSG00000091542.8	503	4.83952e-07	3.48414e-06	-1.36454	-2.27012	-2.62878	-1.64024	-3.54903	-3.71373
POLR2D	ENSG00000144231.6	504	5.35588e-10	8.40004e-09	-3.35493	-2.26455	-1.96137	-1.48957	-2.88377	-2.84765
SYT1	ENSG00000067715.9	505	3.68153e-05	0.00015916	2.05071	2.10717	1.43725	2.04351	-2.20387	2.03982
AZIN1	ENSG00000155096.9	507	5.64212e-07	3.97235e-06	-1.37539	-2.41499	-1.64511	-1.11805	-3.00847	-3.36904
RTN4	ENSG00000115310.13	510	1.29865e-07	1.1036e-06	-1.35549	-1.90734	-1.79802	-1.27624	-2.34088	-2.70279
UBQLN1	ENSG00000135018.9	514	7.02845e-06	3.69425e-05	-1.33465	-1.54854	-1.45558	-1.41039	-2.73636	-2.50275
RAB25	ENSG00000132698.9	522	1.12364e-07	9.69136e-07	-2.33753	-3.67839	-1.37066	-2.1189	-1.62335	-3.3737
SMG7	ENSG00000116698.16	523	1.18036e-07	1.01358e-06	-1.0997	-2.60806	-1.64857	-1.68739	-1.34309	-1.02245
SLC31A1	ENSG00000136868.9	526	1.66902e-07	1.36954e-06	-1.3679	-1.36788	-1.47973	-1.57079	-1.6292	-3.58568
FBP1	ENSG00000165140.5	528	1.05987e-07	9.23827e-07	-3.03155	1.52852	1.45282	1.94054	-2.78099	-3.19516
PRSS23	ENSG00000150687.7	532	8.46379e-06	4.3507e-05	2.24689	1.54668	1.85605	1.94658	2.45821	-3.27163
C16orf80	ENSG00000070761.3	533	8.59432e-06	4.40765e-05	-1.02709	-2.33842	-1.66347	-1.69222	-3.82918	-1.88173
PHB2	ENSG00000215021.4	538	1.86388e-07	1.51091e-06	-1.8185	-1.40206	-3.2143	-2.55984	-2.19535	-3.40973
SUMO3	ENSG00000184900.11	543	1.59687e-07	1.31839e-06	-1.9486	-2.60552	-1.68908	-1.12986	-2.08953	-2.33399
MYL12A	ENSG00000101608.8	543	1.94771e-07	1.57153e-06	-1.65368	-1.77844	-1.09114	-1.18366	-2.17446	-3.19568
VOPP1	ENSG00000154978.8	544	9.16862e-09	1.06278e-07	-2.36121	-2.70789	-1.34799	-1.32556	-1.81519	-1.20396
UBAP2	ENSG00000137073.16	545	9.24308e-06	4.69114e-05	-1.56848	-1.5385	-1.26085	-1.09329	-2.56309	-2.03358
SF3B3	ENSG00000189091.8	545	3.15336e-05	0.000139134	-1.96128	-2.05488	-2.67411	-2.4995	-3.39621	-2.38314
TCEB3	ENSG00000011007.8	546	1.66211e-07	1.36648e-06	-1.57552	-2.91061	-1.33101	-1.48388	-1.24286	-2.87796
TIMMDC1	ENSG00000113845.5	549	2.24655e-07	1.78775e-06	-3.09146	-3.54415	-1.90443	-1.20357	-2.10844	-3.91677
LEPROTL1	ENSG00000104660.13	551	1.16884e-09	1.6892e-08	-3.39024	-1.8073	-1.12242	-1.04968	-3.17857	-2.35936
RAB14	ENSG00000119396.6	552	1.21988e-09	1.75485e-08	-2.90691	-2.49273	-1.39032	-1.15838	-1.71277	-2.08532
MKI67IP	ENSG00000155438.7	552	8.26132e-07	5.55145e-06	-2.6225	-2.16228	-2.34121	-1.06997	-3.36808	-3.64453
GGPS1	ENSG00000152904.7	558	6.56062e-08	6.01692e-07	-3.16399	-3.24658	-1.77526	-1.47229	-2.38851	-2.47756
LSM6	ENSG00000164167.5	560	1.35943e-09	1.94131e-08	-2.79848	-2.49855	-1.67769	-1.99556	-2.78892	-2.14583
TARDBP	ENSG00000120948.11	560	1.39751e-06	8.87967e-06	-1.85773	-2.14123	-2.98529	-1.6177	-3.11862	-3.11987
TFRC	ENSG00000072274.8	565	1.25611e-05	6.18961e-05	-2.32889	-2.75048	-1.34576	-1.44789	-3.53098	-2.61094
TIMM8A	ENSG00000126953.5	569	2.2496e-07	1.78927e-06	-1.25253	-2.26572	-1.47086	-1.3412	-2.35361	-1.7787
GRSF1	ENSG00000132463.9	570	9.2372e-08	8.19762e-07	-2.75984	-1.84957	-2.47834	-1.61349	-1.52857	-3.34286
GTF3C2	ENSG00000115207.9	573	8.08298e-07	5.44331e-06	-2.05794	-1.45821	-2.91086	-2.04476	-2.19324	-1.87844
QRSL1	ENSG00000130348.7	580	2.50725e-07	1.96108e-06	-1.31404	-2.09282	-2.04478	-1.04894	-1.17195	-1.36134
RNF38	ENSG00000137075.13	581	1.77447e-08	1.91891e-07	-1.91791	-2.13112	-1.5316	-1.54709	-1.64672	-1.11485
RNF149	ENSG00000163162.4	582	1.30001e-07	1.1036e-06	-2.6213	-2.91897	-1.73704	-1.23892	-2.61388	-2.06737
BRCC3	ENSG00000185515.10	583	5.04084e-07	3.6074e-06	-2.73133	-2.31345	-2.31853	-1.36237	-3.49099	-1.77533
COX5B	ENSG00000135940.2	584	2.0039e-07	1.60939e-06	-2.76164	-2.4277	-1.81589	-2.0441	-2.1007	-2.88331
VEGFA	ENSG00000112715.16	584	4.66668e-07	3.38307e-06	-2.36215	-2.34624	-2.6516	-1.52494	-1.55732	-1.26655
NPIPB15	ENSG00000196436.7	584	1.44041e-05	6.96681e-05	1.90176	1.03751	1.31439	1.3993	2.16067	1.9956
NOL8	ENSG00000198000.7	590	2.12992e-09	2.89614e-08	-3.37924	-2.69174	-1.89882	-2.32313	-3.05709	-2.48488
MTDH	ENSG00000147649.5	595	4.96129e-07	3.55544e-06	-1.19182	-1.81289	-1.80627	-1.58643	-2.10902	-2.42441
PSMD13	ENSG00000185627.13	596	2.17342e-09	2.94422e-08	-3.45873	-3.32975	-1.07545	-1.59452	-2.07386	-3.62047
THBS2	ENSG00000186340.10	596	5.15462e-06	2.78806e-05	2.57189	2.49322	2.61234	1.2835	2.60509	2.61504
CEP350	ENSG00000135837.11	597	8.80274e-06	4.49685e-05	-1.35627	-2.54193	-1.37812	-2.16287	-2.36639	-2.52021
MRPL49	ENSG00000149792.4	601	2.73397e-08	2.77785e-07	-2.06702	-2.34885	-1.52211	-1.6763	-2.06342	-3.36756
CDC123	ENSG00000151465.9	604	2.65909e-09	3.51481e-08	-3.97882	-2.37929	-1.12152	-1.47887	-3.09805	-3.53096
POLE3	ENSG00000148229.8	608	3.07665e-09	4.00329e-08	-3.1409	-2.46252	-1.93589	-1.38104	-3.18044	-3.50194
CAPRIN1	ENSG00000135387.15	611	3.41541e-07	2.57506e-06	-2.04377	-2.88421	-1.53184	-1.62677	-1.96201	-2.00145
CTNNA1	ENSG00000044115.16	611	2.08953e-06	1.25573e-05	-1.72295	-1.76441	-1.95623	-1.22232	-2.83552	-2.86796
FOXN2	ENSG00000170802.11	615	1.27861e-06	8.19077e-06	-1.40377	-1.96777	-2.50408	-1.60803	-1.20445	-2.68603
RAB33B	ENSG00000172007.5	616	4.0892e-09	5.23263e-08	-3.11437	-2.03083	-1.26303	-1.53938	-3.24453	-2.25006
ACP1	ENSG00000143727.11	616	1.08863e-05	5.43515e-05	-2.68968	-1.78377	-1.33779	-1.90744	-3.21812	-2.84872
KNOP1	ENSG00000103550.9	619	4.69395e-09	5.9193e-08	-2.96168	-1.4799	-1.99544	-1.82997	-1.5615	-1.69443
H2AFV	ENSG00000105968.14	619	3.59177e-07	2.69245e-06	-2.54791	-3.16422	-2.83073	-1.47529	-2.79709	-2.59756
NDRG3	ENSG00000101079.16	622	4.77863e-07	3.44984e-06	-1.25397	-1.65941	-1.32805	-1.18822	-2.34796	-3.87205
ASH2L	ENSG00000129691.11	622	9.64258e-06	4.87019e-05	1.77683	2.52714	1.06589	2.19628	2.3987	2.25063
OXA1L	ENSG00000155463.8	627	4.86625e-07	3.50016e-06	-1.81452	-1.9849	-1.69616	-1.72042	-3.3532	-3.79066
CHCHD1	ENSG00000172586.7	628	5.12897e-09	6.38549e-08	-2.93443	-1.36488	-2.35227	-1.10217	-1.93575	-2.24604
BROX	ENSG00000162819.7	631	4.01044e-07	2.96788e-06	-1.59858	-3.38547	-1.19859	-1.67984	-1.51719	-2.95173
ESD	ENSG00000139684.9	631	5.11179e-07	3.6416e-06	-2.86683	-1.59913	-1.34162	-1.61534	-1.48411	-3.82183
ADRM1	ENSG00000130706.8	632	3.44111e-08	3.39915e-07	-2.62358	-2.63307	-2.03653	-1.2608	-2.7169	-2.96542
WDR45	ENSG00000196998.11	633	2.11439e-05	9.77898e-05	-1.74651	-2.18908	-1.2334	-1.97246	-3.22868	-3.07474
ZFAND5	ENSG00000107372.8	635	4.32204e-07	3.1702e-06	-2.08279	-3.05418	-2.49865	-1.63859	-2.91127	-2.73406
YTHDF2	ENSG00000198492.10	639	3.17178e-07	2.40879e-06	-2.91339	-2.39628	-2.22444	-1.19193	-2.18176	-3.20356
TMEM256	ENSG00000205544.3	640	0.000112372	0.000428785	-1.85744	-1.89545	-1.06571	-2.55941	-2.73544	-3.11631
NCKAP1	ENSG00000061676.10	642	8.29004e-06	4.27262e-05	-2.4155	-1.06851	-1.84735	-1.53634	-2.84483	-1.78841
ZBTB41	ENSG00000177888.7	645	6.51427e-09	7.90253e-08	-2.03118	-1.57594	-1.61254	-1.52252	-1.43576	-1.68884
SPARC	ENSG00000113140.6	645	2.65324e-05	0.000119595	2.14769	1.74014	1.96296	1.84582	-2.2826	2.07166
ATIC	ENSG00000138363.10	652	6.82813e-09	8.20707e-08	-3.62175	-1.52925	-1.03968	-1.74212	-2.53426	-3.34877
WIPI1	ENSG00000070540.8	658	1.23781e-06	7.95875e-06	2.86274	1.71665	-1.54641	1.36735	2.67362	2.07075
MTA3	ENSG00000057935.9	658	2.05753e-06	1.2384e-05	-2.24125	-1.26183	-2.77635	-1.0133	-1.92523	1.01305
MAN1A2	ENSG00000198162.8	658	1.09825e-05	5.47619e-05	-1.19764	-1.90869	-1.34138	-1.59637	-1.60525	-1.93249
MRPS11	ENSG00000181991.11	661	8.31874e-09	9.76578e-08	-3.2023	-1.54667	-2.84966	-1.16094	-1.78124	-2.66595
ZBTB33	ENSG00000177485.6	661	2.12625e-06	1.27388e-05	-1.09464	-1.25826	-1.87446	-1.20219	-1.36866	-1.52169
LRP2	ENSG00000081479.8	669	2.2445e-05	0.000103076	1.45825	1.40427	1.35711	1.23881	-2.67584	-1.93546
KMT2A	ENSG00000118058.16	676	7.12582e-07	4.87643e-06	-2.16745	-2.4296	-1.85416	-1.00949	-1.85794	-1.75291
TMC5	ENSG00000103534.12	679	7.34178e-07	5.00405e-06	-1.51278	-3.44308	-1.90069	1.87382	1.4545	-2.18964
NELFCD	ENSG00000101158.8	684	7.71164e-07	5.2157e-06	-1.50285	-2.7651	-2.36	-1.12232	-2.96198	-1.98159
YTHDF3	ENSG00000185728.12	687	2.89565e-05	0.000129148	-1.09537	-1.23295	-2.11932	-1.3559	-2.9967	-1.44047
CORO6	ENSG00000167549.14	694	0.000219327	0.00077122	1.32802	1.34401	1.38243	1.38243	1.38243	1.29897
DKC1	ENSG00000130826.11	698	1.20923e-06	7.79158e-06	-2.16442	-1.52987	-2.09007	-2.18259	-3.17549	-3.18372
LPGAT1	ENSG00000123684.8	700	2.8765e-06	1.66839e-05	-1.87749	-1.35954	-2.37525	-1.25941	-1.20349	-1.90783
CNPY2	ENSG00000257727.1	707	1.31691e-06	8.40166e-06	-1.54414	-1.58845	-1.22277	-2.16537	-2.14512	-2.99639
STIP1	ENSG00000168439.12	727	6.69816e-06	3.5349e-05	-2.56068	-3.12397	-1.84212	-1.25586	-3.10135	-2.72272
UBE2R2	ENSG00000107341.4	729	8.39213e-07	5.62968e-06	-1.92885	-2.00035	-1.48418	-1.52689	-1.36515	-1.43981
ZNF251	ENSG00000198169.4	740	3.73076e-08	3.64157e-07	-1.66307	-1.15585	-1.99971	-1.26493	-1.78232	-1.48675
C1orf27	ENSG00000157181.10	743	1.66846e-05	7.94693e-05	-1.64834	-2.85184	-1.84039	-2.05313	-3.12027	-1.87867
RANBP2	ENSG00000153201.11	744	1.67843e-06	1.04149e-05	-1.18129	-2.54272	-2.04787	-1.5644	-2.24297	-1.85188
MAGOHB	ENSG00000111196.5	757	9.39961e-07	6.20962e-06	-3.00089	-1.928	-3.23521	-2.26109	-3.09735	-2.85603
NOVA1	ENSG00000139910.15	758	0.000158654	0.000581682	1.63136	1.54435	1.53474	1.55857	1.63136	1.63136
RNASEH1	ENSG00000171865.5	759	5.05787e-06	2.74237e-05	-1.02675	-1.09183	-2.5695	-1.00333	-1.67395	-3.11952
UBE2A	ENSG00000077721.11	760	2.43412e-05	0.000110743	-1.01238	-2.5425	-1.76219	-1.12171	-3.03009	-1.79052
CAT	ENSG00000121691.4	763	5.20332e-06	2.81051e-05	-1.36661	-2.35615	-2.88504	-1.00061	-1.19646	-2.77325
KLHL28	ENSG00000179454.9	766	5.09799e-05	0.000213148	-1.9982	-1.53608	-2.05365	-1.18384	-2.98331	-2.52633
CASP4	ENSG00000196954.8	776	2.02425e-06	1.22072e-05	-1.94519	-2.46098	-1.38083	-1.41281	-1.83851	-1.32494
SF3B5	ENSG00000169976.5	784	4.61266e-08	4.38735e-07	-3.65809	-2.21199	-2.44175	-1.36467	-1.3749	-2.63305
TMEM68	ENSG00000167904.10	786	4.71967e-08	4.47553e-07	-2.53215	-2.57748	-1.2222	-1.37796	-3.30447	-1.92878
FOXA1	ENSG00000129514.4	787	6.99377e-07	4.79656e-06	-2.6338	-2.65103	-1.96355	1.84727	-2.08189	-3.08094
UBE3C	ENSG00000009335.13	793	1.4207e-06	9.0087e-06	-1.95965	-1.46013	-1.41139	-1.21028	-1.00692	-3.10412
RAD21	ENSG00000164754.8	794	2.84782e-06	1.65346e-05	-2.13603	-1.79284	-1.72924	-1.40507	-2.16689	-2.58691
TMEM63A	ENSG00000196187.7	800	5.51315e-08	5.14068e-07	-1.89335	-1.54825	-1.59705	-1.24606	-1.05518	-1.95271
IFIT1	ENSG00000185745.8	802	1.41357e-06	8.97442e-06	3.28468	2.87853	3.08879	2.24313	2.87329	2.7185
RAB7A	ENSG00000075785.8	807	3.04683e-06	1.7503e-05	-1.62549	-2.3354	-1.74461	-1.15926	-1.58834	-2.52765
MITD1	ENSG00000158411.6	809	2.52662e-06	1.48977e-05	-2.09721	-2.62572	-2.12499	-1.81066	-2.42889	-3.39448
INSIG2	ENSG00000125629.10	809	3.13928e-06	1.79702e-05	-1.39932	-1.77752	-2.26972	-1.17059	-1.78346	-4.33853
SF3B1	ENSG00000115524.11	810	8.01274e-05	0.000316962	-2.33949	-2.67055	-1.97906	-1.28467	-2.68801	-1.9511
TMEM183A	ENSG00000163444.7	811	1.28371e-06	8.21645e-06	-2.19584	-2.39018	-1.9547	-1.6126	-1.83651	-2.23391
TMEM101	ENSG00000091947.5	815	9.13485e-06	4.64073e-05	1.9093	2.04123	2.74175	1.463	2.03809	1.74043
WDR12	ENSG00000138442.5	816	7.6614e-07	5.18936e-06	-2.97122	-1.19499	-1.46588	-1.14233	-2.53392	-4.19782
FASTKD2	ENSG00000118246.9	826	8.13342e-08	7.34309e-07	-2.45207	-1.50172	-1.04382	-1.41168	-2.08853	-2.22795
SARNP	ENSG00000205323.4	826	5.28689e-07	3.75095e-06	-3.01136	-2.45653	-2.12815	-1.37774	-2.45856	-3.0376
TRIP12	ENSG00000153827.9	837	1.10858e-05	5.52419e-05	-2.04757	-1.8256	-2.3226	-1.0488	-2.46631	-2.50995
SNRPG	ENSG00000143977.9	842	1.01246e-07	8.87431e-07	-2.92568	-1.49701	-1.87873	-1.36025	-1.98864	-1.51951
TIAL1	ENSG00000151923.13	842	8.16671e-06	4.21879e-05	-2.04646	-2.51263	-1.31544	-1.00953	-3.10113	-1.30443
TARBP1	ENSG00000059588.5	845	3.32726e-06	1.8906e-05	-1.17785	-2.69873	-1.24286	-1.38478	-1.6983	-1.78569
KMT2E	ENSG00000005483.15	848	3.46284e-06	1.95764e-05	-1.05264	-2.55516	-1.34729	-1.12129	-1.52375	-1.89465
HIST1H4C	ENSG00000197061.3	849	5.47079e-07	3.86823e-06	-4.32417	-2.6092	-3.97932	-1.89037	-4.02682	-2.73916
POLG2	ENSG00000256525.2	856	0.00173065	0.00473446	1.98627	1.35788	2.14088	2.21381	-1.97372	1.75691
DHX15	ENSG00000109606.8	859	1.07784e-06	7.03432e-06	-2.81096	-2.74523	-2.54738	-1.16723	-1.42244	-2.53551
SEPHS1	ENSG00000086475.10	860	5.87324e-06	3.13875e-05	-1.79551	-1.74178	-1.8836	-1.38459	-2.68895	-2.48056
ADI1	ENSG00000182551.9	864	1.3223e-05	6.46758e-05	-1.56085	-1.54393	-2.33434	-1.05621	-1.42608	-1.30428
TMEM109	ENSG00000110108.5	865	2.60055e-05	0.000117528	-1.7807	-1.68117	-1.74051	-1.87182	-2.71115	-2.0151
ERCC3	ENSG00000163161.8	876	1.12177e-06	7.2845e-06	-1.84022	-1.90102	-1.69859	-1.14799	-1.66107	-3.44538
PPP1R7	ENSG00000115685.10	877	5.17225e-06	2.79663e-05	-1.02462	-2.032	-1.42188	-1.56648	-2.01178	-3.73134
PON3	ENSG00000105852.6	882	0.00204402	0.00547965	-1.06999	-1.51003	1.63797	1.70744	1.04502	1.48865
MRFAP1L1	ENSG00000178988.10	883	5.40187e-07	3.82732e-06	-2.84889	-2.13913	-2.6007	-1.34818	-2.69327	-4.05488
KANSL2	ENSG00000139620.8	928	3.75491e-05	0.000161751	-1.58084	-1.96099	-1.47014	-1.02885	-2.9419	-3.38957
ELMO2	ENSG00000062598.13	929	2.11109e-05	9.76935e-05	-1.51925	-1.72009	-2.70053	-1.27663	-1.79768	-1.91098
MRPL47	ENSG00000136522.9	936	8.3603e-06	4.30458e-05	-2.47713	-2.62344	-1.06923	-1.09442	-2.32387	-3.10427
GPN1	ENSG00000198522.9	937	2.18015e-05	0.000100327	-1.154	-1.08756	-3.07368	-1.1766	-2.42955	-1.7808
ZNF544	ENSG00000198131.9	944	1.68794e-05	8.02747e-05	-1.54782	-1.03743	-1.72957	-1.39489	-1.79365	-2.46473
SEC31A	ENSG00000138674.12	950	2.44739e-05	0.000111282	-2.50713	-1.85041	-3.06733	-1.70917	-1.26597	-1.76303
HDDC2	ENSG00000111906.13	951	9.07364e-06	4.61413e-05	-2.45931	-1.35585	-2.06061	-1.28864	-2.49442	-3.53908
RABIF	ENSG00000183155.4	961	8.90748e-06	4.54145e-05	-1.18166	-2.01638	-1.00986	-1.11986	-1.51143	-1.74688
SLC35A1	ENSG00000164414.12	975	3.77367e-07	2.81263e-06	-2.5615	-1.98605	-1.73783	-1.33357	-1.30205	-2.46026
FBXL7	ENSG00000183580.8	976	0.000104235	0.000401755	1.32865	1.12971	1.33137	1.18562	1.18593	1.21211
SRSF10	ENSG00000188529.10	981	6.92257e-06	3.64349e-05	-1.19801	-2.79092	-1.39631	-1.11351	-2.14719	-2.7816
MARS	ENSG00000166986.8	982	1.1791e-05	5.84951e-05	-1.63006	-1.75275	-1.6861	-1.42584	-1.71122	-3.55818
RELA	ENSG00000173039.14	982	3.06592e-05	0.000135814	-1.01779	-1.49729	-1.98276	-1.09907	-1.29716	-1.17005
ABCE1	ENSG00000164163.6	991	4.37947e-07	3.20158e-06	-2.95179	-1.02322	-1.04963	-1.21252	-2.28607	-3.1792
ASNSD1	ENSG00000138381.5	992	1.25423e-05	6.18295e-05	-1.96544	-1.33879	-1.5518	-1.01563	-2.07045	-3.36115
ATXN7L3B	ENSG00000253719.2	998	1.23219e-05	6.08775e-05	-1.69723	-2.29906	-2.30094	-1.34269	-1.74409	-2.26044
GSTM2	ENSG00000213366.8	1012	3.26854e-05	0.000143447	2.33359	2.37002	2.43248	1.83333	2.28316	2.43248
SH3GLB1	ENSG00000097033.10	1014	7.16867e-06	3.75689e-05	-2.48944	-1.9739	-1.68294	-1.49777	-2.45651	-2.40665
PSMD2	ENSG00000175166.12	1024	1.52384e-05	7.32502e-05	-2.43173	-2.85626	-1.3379	-1.37681	-2.49575	-2.58458
ZFAND2B	ENSG00000158552.8	1025	1.72806e-05	8.20083e-05	-1.21554	-1.78977	-1.70964	-1.60835	-1.48113	-3.59531
ORC3	ENSG00000135336.10	1037	5.78406e-07	4.06131e-06	-2.6903	-1.69764	-1.62673	-1.00715	-1.51095	-1.85703
ITGB1BP1	ENSG00000119185.8	1040	4.29932e-05	0.00018252	-1.70731	-1.23903	-2.75823	-1.90892	-2.54695	-2.52752
RSBN1L	ENSG00000187257.10	1050	3.71669e-05	0.000160547	-1.65915	-1.78359	-1.83378	-1.00278	-1.1233	-1.06761
PARN	ENSG00000140694.12	1053	6.42561e-07	4.45773e-06	-2.39385	-1.41567	-1.78457	-1.57033	-1.47122	-1.89633
EIF2B4	ENSG00000115211.11	1055	1.8974e-05	8.92051e-05	-1.67375	-2.79093	-2.33647	-1.95728	-1.93429	-2.49162
EED	ENSG00000074266.13	1059	1.96364e-05	9.18501e-05	-1.51196	-2.29972	-1.03007	-1.0701	-2.68611	-1.37709
ADH5	ENSG00000197894.6	1062	1.0833e-06	7.06402e-06	-2.74688	-1.45534	-2.67849	-1.24167	-2.93454	-1.97237
XPO6	ENSG00000169180.7	1069	5.19344e-05	0.000216533	-1.09184	-1.35725	-2.32708	-1.10791	-1.71755	-2.18333
UHMK1	ENSG00000152332.11	1069	0.000301994	0.00102379	-1.65151	-2.09063	-1.89243	-1.85469	-1.33004	-1.11339
SYF2	ENSG00000117614.5	1075	1.612e-05	7.70381e-05	-1.08403	-2.35571	-1.72056	-1.50237	-1.93596	-2.58685
SUV420H1	ENSG00000110066.10	1087	5.92069e-05	0.000243188	-1.45366	-1.94398	-2.08229	-1.15741	-1.66009	-1.8345
CIAO1	ENSG00000144021.2	1096	3.31641e-05	0.000145141	-1.6205	-1.50767	-1.61167	-1.55224	-2.20769	-2.72702
STX12	ENSG00000117758.9	1110	2.08988e-05	9.68869e-05	-1.53256	-2.63486	-2.16759	-1.56523	-1.51083	-3.00432
INTS8	ENSG00000164941.9	1124	0.00264861	0.00689123	-1.15404	-1.43848	-1.33696	-1.74021	-2.39211	-2.44797
NAA38	ENSG00000128534.3	1130	1.19231e-06	7.69464e-06	-2.55943	-1.73289	-1.42259	-1.05999	-1.68223	-2.52689
CTSD	ENSG00000117984.8	1134	1.21581e-06	7.83013e-06	-2.59314	-1.63881	-1.16325	-1.0549	-1.215	-1.61258
TFDP1	ENSG00000198176.8	1135	1.21849e-06	7.84093e-06	-1.77269	-1.49773	-1.04264	-1.12745	-1.83659	-1.98352
CWC22	ENSG00000163510.9	1143	1.4042e-05	6.81272e-05	-1.74646	-2.02008	-1.33638	-1.10049	-2.55635	-1.75853
OAS2	ENSG00000111335.8	1148	2.11168e-05	9.76935e-05	2.10907	1.26689	1.37767	1.57546	1.48333	1.45303
TCL1B	ENSG00000213231.8	1149	0.000630492	0.00195404	1.78451	1.85192	1.85192	1.72371	1.51045	1.85192
ORC4	ENSG00000115947.9	1156	1.41897e-06	9.00136e-06	-2.78071	-1.41144	-2.04559	-1.34499	-2.3397	-2.52378
DDX1	ENSG00000079785.10	1160	8.64613e-05	0.000339868	-1.36491	-1.26089	-2.25055	-1.67115	-1.98255	-1.97163
CEBPZ	ENSG00000115816.9	1182	7.65366e-05	0.000304996	-1.4766	-2.05147	-1.92138	-1.40667	-1.66153	-2.06603
YIPF6	ENSG00000181704.7	1183	0.000590403	0.00184458	-1.68558	-1.51708	-1.23857	-1.28029	-2.97204	-2.63193
UBR4	ENSG00000127481.10	1189	4.86423e-05	0.000204248	-1.17942	-2.04481	-1.43565	-1.05439	-2.56897	-2.80553
KCTD21	ENSG00000188997.3	1203	0.000665775	0.00205097	1.25981	1.37977	1.48126	1.31317	1.38626	1.06268
BEX1	ENSG00000133169.5	1204	0.000111093	0.000424837	1.83675	1.81729	1.83675	1.56279	1.64464	1.83675
MAP3K2	ENSG00000169967.12	1208	4.57715e-05	0.00019344	-1.05317	-1.89964	-1.76566	-1.3283	-2.31751	-1.70536
GCA	ENSG00000115271.6	1212	4.71267e-05	0.000198524	-1.10179	-2.39802	-2.13782	-1.08912	-1.1337	-1.05957
MATN3	ENSG00000132031.8	1237	0.0017433	0.00476324	1.34913	1.23815	1.19927	1.22233	1.20145	1.26475
RPE	ENSG00000197713.10	1245	2.77837e-06	1.6217e-05	-2.33002	-1.78276	-1.87557	-1.33466	-1.94388	-2.55531
NPIPA7	ENSG00000214967.4	1245	0.000221671	0.000778237	-2.08337	-2.32927	-2.33033	-1.44893	-2.71826	-1.5454
ARMC1	ENSG00000104442.5	1277	7.72268e-05	0.000307371	-1.90862	-1.00676	-2.16717	-1.16563	-2.13029	-1.50729
SUCLG1	ENSG00000163541.7	1282	3.49219e-06	1.97067e-05	-2.6305	-1.15873	-1.28394	-1.79462	-2.16894	-2.70109
EXOSC8	ENSG00000120699.8	1285	3.64428e-06	2.05058e-05	-2.85633	-2.73036	-1.09452	-1.11016	-1.51118	-2.79078
ACTR3	ENSG00000115091.7	1286	7.10028e-05	0.000285857	-2.04832	-2.67526	-1.79369	-1.18074	-1.95892	-1.67094
PRPS2	ENSG00000101911.8	1291	7.26475e-05	0.000291504	-1.52307	-2.68949	-1.38579	-1.15226	-1.92902	-2.17771
SYTL4	ENSG00000102362.11	1298	6.46236e-05	0.000262882	1.94908	1.8111	1.87575	1.44305	1.22757	1.53306
FIP1L1	ENSG00000145216.11	1304	3.97656e-05	0.000170034	-2.30093	-1.46246	-2.40907	-1.31149	-1.40137	-1.23362
GAB2	ENSG00000033327.8	1313	8.49953e-05	0.000334526	1.27113	1.06958	1.31116	1.10192	1.07101	1.47527
GEMIN7	ENSG00000142252.6	1316	6.57789e-06	3.47612e-05	-2.7064	-1.64813	-1.09223	-1.46121	-2.06805	-3.24873
FYTTD1	ENSG00000122068.8	1323	7.1846e-05	0.000288584	-1.86725	-2.48853	-1.45022	-1.07863	-1.71051	-2.52598
ETHE1	ENSG00000105755.3	1343	8.25823e-05	0.000326014	-1.92143	-2.28604	-1.99858	-1.7007	-1.1239	-3.69342
NUP35	ENSG00000163002.8	1345	0.00114952	0.0033085	-1.20629	-1.61235	-1.18347	-1.08093	-2.99428	-2.31938
AC138969.4	ENSG00000183889.8	1346	0.000101138	0.000390977	-1.31502	-1.88651	-1.83774	-1.34418	-1.84806	-1.58811
INTS10	ENSG00000104613.7	1368	0.000102834	0.000396941	-1.08225	-2.27971	-1.02364	-1.44857	-2.01207	-2.08718
RGS10	ENSG00000148908.10	1371	0.000104799	0.000403633	-2.05578	-2.50751	-1.7158	-1.61007	-2.03723	-2.19583
ARPC2	ENSG00000163466.11	1380	2.88375e-05	0.000128654	-2.45718	-2.19271	-2.25417	-1.43964	-1.5042	-1.54495
HDAC3	ENSG00000171720.5	1403	0.00044152	0.00143005	-1.21063	-1.53339	-1.88327	-1.58995	-2.1522	-1.77181
MOV10	ENSG00000155363.14	1406	0.000120493	0.00045632	-1.32316	-2.0603	-1.78393	-1.45982	-1.71244	-1.54101
NAGK	ENSG00000124357.8	1422	8.87418e-06	4.5277e-05	-3.01322	-1.51213	-2.20949	-1.6118	-2.59422	-1.42637
ACOT8	ENSG00000101473.12	1516	1.60838e-05	7.68887e-05	-1.98468	-1.22864	-1.19977	-1.20075	-1.99254	-1.21084
SERF1B	ENSG00000205572.5	1528	0.000247207	0.000857874	-1.26653	1.23314	1.01688	1.3163	-1.39913	-2.62381
IMPAD1	ENSG00000104331.4	1562	0.000203454	0.000722062	-1.55592	-1.32558	-1.46471	-1.20404	-1.49888	-1.2011
ANXA5	ENSG00000164111.10	1571	0.000545272	0.00171834	-1.04153	-1.56174	-2.38973	-1.77226	-1.67731	-1.27991
LCLAT1	ENSG00000172954.9	1582	4.75739e-05	0.0002003	-2.27743	-1.59936	-2.32825	-1.2367	-1.45811	-2.20377
NAA10	ENSG00000102030.11	1582	0.000326851	0.00109856	-1.04642	-1.3231	-1.76069	-1.72101	-2.38305	-2.72893
MAGI2	ENSG00000187391.13	1629	0.000586936	0.00183595	1.30654	1.2476	1.32156	1.00295	1.25134	1.27417
SLC35F5	ENSG00000115084.8	1644	0.003067	0.00781468	-1.03331	-1.11744	-1.66533	-1.14892	-2.2858	-1.93466
USP39	ENSG00000168883.15	1647	0.000425968	0.00138855	-1.7482	-1.43798	-1.18332	-1.27112	-1.42137	-2.84768
GTPBP4	ENSG00000107937.14	1720	0.00108649	0.00315145	-1.92544	-1.67771	-2.13946	-1.03651	-1.99142	-1.0019
APLP1	ENSG00000105290.7	1751	0.00241497	0.00636381	1.07571	1.03091	1.2827	1.12342	1.28894	1.17316
OCIAD2	ENSG00000145247.7	1785	0.000707401	0.00216132	-1.83158	-1.76774	-2.30123	-1.28336	-1.53332	-2.65869
ATP8B2	ENSG00000143515.12	1895	0.00310076	0.00789684	1.24343	1.1584	1.02302	1.06947	1.24343	1.03776
COPS4	ENSG00000138663.4	2021	0.00199306	0.0053641	-1.6423	-1.54001	-2.11476	-1.14724	-1.90715	-1.37305
ZNF638	ENSG00000075292.14	2106	0.0025753	0.00673412	-1.37205	-1.68422	-1.99205	-1.38146	-1.59072	-1.91139
KIAA1033	ENSG00000136051.9	2155	0.00154526	0.00428274	-1.3555	-1.97121	-1.65354	-1.23082	-1.89267	-1.77969

## Sheet: C4
# Supplementary table 4.4. DEGs of lncRNA subtypes (C4)
Name	Ensembl_ID	Top	p.value	FDR	logFC.1	logFC.2	logFC.3	logFC.5	logFC.6	logFC.7
TFF3	ENSG00000160180.14	1	3.29266e-41	7.35532e-38	7.1223	7.05396	3.47999	9.2493	5.4025	5.61089
IL8	ENSG00000169429.6	1	2.04592e-40	3.55467e-37	10.0467	7.91691	10.3578	10.2872	8.60129	9.42373
GATA3	ENSG00000107485.11	2	1.04253e-70	8.15101e-67	-6.4944	-2.44696	-5.09906	-2.39131	-6.04192	-5.16075
SEMA4B	ENSG00000185033.10	2	6.25275e-40	9.77743e-37	5.60433	5.13345	6.24523	6.49852	6.57924	6.47612
PKIB	ENSG00000135549.10	2	1.14918e-29	5.7967e-27	6.01999	2.74251	6.02265	5.9932	6.84447	2.53879
CDK12	ENSG00000167258.9	2	9.87114e-26	3.02657e-23	2.69337	4.41404	4.17244	4.4549	3.80804	3.89616
S100P	ENSG00000163993.6	3	4.19334e-30	2.26108e-27	5.46745	2.87012	8.08779	2.66286	3.53747	7.79132
NADSYN1	ENSG00000172890.7	4	1.1392e-29	5.7967e-27	5.01222	4.43097	5.96447	5.99227	5.60731	4.55861
BHLHE41	ENSG00000123095.5	5	5.14007e-25	1.46137e-22	4.0339	5.03749	4.36443	4.22187	5.77339	5.48334
RPL19	ENSG00000108298.5	5	2.23582e-23	4.54045e-21	2.00518	2.87866	2.51059	2.30322	2.89229	1.54955
KLF5	ENSG00000102554.9	6	1.42262e-33	1.11227e-30	5.369	3.17132	4.98589	3.11696	2.81267	5.73911
CXCL1	ENSG00000163739.4	6	5.08329e-23	9.81327e-21	7.70976	7.42898	7.69737	6.59646	7.65969	6.59963
SEPP1	ENSG00000250722.1	7	1.50725e-31	8.7292e-29	-8.19625	-2.05805	-2.88228	1.04432	-5.89702	-5.45414
ZNF710	ENSG00000140548.5	7	5.78371e-24	1.2738e-21	4.56774	4.96819	5.68021	5.48127	4.25472	5.02896
CEACAM6	ENSG00000086548.8	7	1.2429e-23	2.66236e-21	6.79743	4.51866	6.34643	6.23383	7.33806	7.92873
CEACAM5	ENSG00000105388.10	8	3.75861e-23	7.34668e-21	6.19583	5.64387	6.2492	6.08976	6.00165	6.37474
HLA-A	ENSG00000206503.7	10	2.76546e-37	3.60362e-34	8.45493	5.55323	3.41023	3.88715	2.93267	4.17293
NGRN	ENSG00000182768.7	10	6.01534e-37	7.23553e-34	6.10649	5.89056	7.31465	6.60203	6.42544	6.02847
MSL1	ENSG00000188895.7	10	3.86481e-27	1.63335e-24	-1.09448	4.84398	6.169	4.65397	1.47287	4.5815
BHLHE40	ENSG00000134107.4	10	1.58033e-21	2.57413e-19	-3.75	-4.76598	-3.4839	-2.72671	-3.29547	-1.9237
DUSP6	ENSG00000139318.7	10	3.43242e-21	5.31414e-19	4.87556	2.36005	6.02711	5.98273	5.43268	7.18681
AP3S2	ENSG00000157823.12	11	2.87986e-22	5.00359e-20	4.31517	4.35189	5.44628	5.52627	5.19951	2.90135
CXCL17	ENSG00000189377.4	12	6.45617e-21	9.43506e-19	6.44754	2.60862	5.61063	4.95511	6.51732	6.58007
DHCR7	ENSG00000172893.11	13	6.93682e-26	2.25981e-23	3.66155	2.89292	5.85111	4.29826	5.41771	3.91845
MAP2K3	ENSG00000034152.14	13	1.23294e-25	3.70759e-23	3.61253	3.25546	5.58666	5.00373	3.78004	3.16675
PNPO	ENSG00000108439.5	14	2.64975e-20	3.69948e-18	-3.01681	-1.35058	-3.91849	-2.62389	-5.25851	-4.66831
CIB1	ENSG00000185043.6	15	8.30124e-28	3.93353e-25	4.89596	4.59374	6.01922	6.02502	6.81781	4.57423
MYO10	ENSG00000145555.10	16	3.60583e-19	4.23943e-17	1.40752	1.46622	2.67172	2.55078	5.00529	4.53357
IDH2	ENSG00000182054.5	17	3.09325e-24	7.13476e-22	3.54702	3.38201	5.43222	5.07307	4.47291	3.52595
WBP5	ENSG00000185222.7	18	3.33408e-19	3.97977e-17	6.07502	1.24444	2.16412	1.41905	5.82106	5.82619
KRT19	ENSG00000171345.9	19	9.46686e-19	1.04988e-16	-1.82841	-3.47946	-3.8295	-3.6378	-4.97572	-2.31294
RAB11FIP1	ENSG00000156675.11	19	1.40768e-18	1.50766e-16	2.4599	3.09771	-1.32287	4.85512	2.29708	2.27079
MED1	ENSG00000125686.7	20	2.40257e-24	5.77985e-22	3.16323	3.89023	4.97789	3.37896	4.82819	3.84938
MYC	ENSG00000136997.10	20	5.08708e-19	5.72278e-17	-2.42459	-1.95763	-2.7194	-2.55631	-6.79348	-6.8014
AGR2	ENSG00000106541.7	20	2.19401e-18	2.28718e-16	4.44587	2.35915	1.77333	6.49371	2.64367	3.44661
MGP	ENSG00000111341.5	22	8.73847e-28	4.01893e-25	-11.7348	1.02864	-9.6657	-6.37382	-7.87565	2.41985
BPIFB2	ENSG00000078898.6	22	2.46982e-16	1.94073e-14	4.81418	4.77391	4.69212	4.95154	4.74961	5.05772
ANXA1	ENSG00000135046.9	23	1.39336e-22	2.47591e-20	6.98463	4.79687	7.20772	1.49157	6.86799	4.55816
TMEM150C	ENSG00000249242.3	23	3.65185e-16	2.78556e-14	3.43434	1.48324	3.75858	3.97594	3.27482	4.07996
PXDN	ENSG00000130508.6	25	6.92227e-18	6.89449e-16	1.46366	2.16893	1.02879	2.09576	3.41905	3.81
UBD	ENSG00000213886.3	25	4.43543e-16	3.30271e-14	5.55805	5.06392	5.55805	5.25678	3.09259	5.55805
EREG	ENSG00000124882.3	26	3.97313e-16	2.98691e-14	5.56395	5.18395	5.55687	5.03496	5.53223	5.50019
KRT81	ENSG00000205426.6	27	4.88735e-18	4.96256e-16	4.99367	4.80938	4.91359	2.50102	5.00877	4.99455
ORAOV1	ENSG00000149716.8	27	1.38234e-15	9.56446e-14	3.81898	3.70471	3.50902	3.7392	3.88667	3.57032
FOS	ENSG00000170345.5	28	2.30952e-17	2.18872e-15	-2.88502	-5.89453	-4.64888	-3.71982	-4.55663	1.54111
NR1D1	ENSG00000126368.5	28	1.86195e-14	1.07437e-12	2.61124	2.95148	3.53607	3.619	2.37236	3.67868
NIT2	ENSG00000114021.7	29	3.08521e-17	2.88883e-15	-3.61314	-4.24491	-1.75681	-1.77014	-3.6436	-5.27758
MIA3	ENSG00000154305.12	30	5.49352e-24	1.22717e-21	5.09482	2.5943	4.67457	4.33823	4.60313	3.83185
SRI	ENSG00000075142.9	30	3.6432e-17	3.29299e-15	-3.31565	-2.49855	-1.33783	-2.9184	-1.38208	-6.82049
CDC42EP3	ENSG00000163171.6	31	1.32369e-21	2.17879e-19	4.38724	2.70178	4.59389	2.95784	4.07018	3.27117
SUMF2	ENSG00000129103.13	31	1.75205e-15	1.19637e-13	-3.64593	-2.20521	-2.95598	-3.63059	-1.32649	-2.86099
RPSAP58	ENSG00000205246.4	32	6.76767e-17	5.81462e-15	-2.66139	-1.44481	-1.64106	-1.28872	-2.43838	-3.76758
RPL27	ENSG00000131469.8	33	2.82147e-16	2.18412e-14	-1.84167	-2.01921	-2.05015	-2.5927	-4.46052	-3.23001
IFI27	ENSG00000165949.8	34	1.43079e-17	1.38107e-15	6.12034	2.19605	2.11245	4.04557	4.22708	6.07028
ALG8	ENSG00000159063.8	35	4.8366e-21	7.35045e-19	-2.23223	-1.94059	-6.53387	-1.63958	-1.80239	-2.62207
PON2	ENSG00000105854.8	36	1.17774e-16	9.54216e-15	-5.57251	-4.04158	-4.09266	-2.76215	-2.53396	-6.16661
ARL5B	ENSG00000165997.4	38	3.09157e-13	1.38123e-11	2.52851	1.50846	3.24012	3.4178	1.30321	2.72356
SPP1	ENSG00000118785.9	39	5.17508e-16	3.79919e-14	4.93705	4.97201	5.04286	4.46834	4.49416	4.08577
RASD1	ENSG00000108551.4	41	1.04385e-19	1.37165e-17	3.28878	1.37856	3.53035	2.50387	2.83195	2.79731
RPL41	ENSG00000229117.4	42	1.01432e-15	7.27563e-14	-2.00883	-1.25395	-1.78665	-1.72981	-1.75545	-2.07707
MT-ND4L	ENSG00000212907.2	42	5.53427e-15	3.51786e-13	1.02812	1.27489	1.0615	1.34747	1.79816	1.08521
AC090186.1	ENSG00000232941.1	46	2.41672e-21	3.85615e-19	-7.07233	-4.97341	-2.04411	-3.84999	-4.91175	-5.1871
RPL3	ENSG00000100316.11	48	2.47643e-15	1.63392e-13	-1.13725	-1.12958	-1.21397	-1.39917	-1.56833	-2.75608
ANO1	ENSG00000131620.13	49	1.8642e-12	6.99052e-11	1.52554	2.77682	1.52943	2.93603	2.63953	3.13846
HSPA1B	ENSG00000204388.5	50	1.53628e-23	3.20305e-21	4.65628	1.14106	2.60934	2.96609	-1.45815	5.29724
CASC3	ENSG00000108349.10	50	3.47172e-17	3.18468e-15	-1.89539	4.12375	5.062	3.70648	1.4333	2.46361
B4GALT5	ENSG00000158470.5	51	3.48563e-17	3.18468e-15	1.55529	2.11135	3.43465	2.40782	2.01617	2.0736
MED31	ENSG00000108590.6	51	4.71694e-15	3.03534e-13	3.02918	3.87907	5.18853	4.68351	2.83512	2.07803
RPL18A	ENSG00000105640.8	52	1.94257e-14	1.11676e-12	-1.74556	-1.02601	-1.07713	-1.24946	-1.70785	-2.62352
IGF2BP2	ENSG00000073792.11	52	3.21368e-14	1.78834e-12	4.07052	3.73001	3.80904	3.70865	4.04711	4.1349
TOMM7	ENSG00000196683.6	53	4.56627e-14	2.4453e-12	-3.04502	-2.27097	-2.41836	-3.67834	-3.19788	-3.98496
HIST2H4B	ENSG00000182217.7	55	9.69899e-14	4.87663e-12	-2.86734	-2.84281	-1.41619	-2.60753	-4.81466	-2.52818
AFMID	ENSG00000183077.11	56	9.47989e-23	1.74396e-20	-3.66884	-3.09774	-3.36463	-2.41134	-2.24902	-4.73694
FLOT2	ENSG00000132589.11	57	5.06106e-16	3.73301e-14	1.48785	3.0996	4.30102	3.78262	3.46774	1.89038
HSD17B12	ENSG00000149084.7	58	1.80753e-13	8.41767e-12	-2.74089	-3.76774	-1.95859	-2.20122	-2.58994	-1.44467
PBDC1	ENSG00000102390.6	59	2.38791e-16	1.89542e-14	1.09079	1.46252	4.85728	2.83651	2.57715	1.82761
FRK	ENSG00000111816.6	59	1.36201e-14	8.10134e-13	3.27371	2.53741	2.92921	2.9247	2.31261	2.66277
COA4	ENSG00000181924.6	59	4.84893e-14	2.55903e-12	-3.81124	-2.22539	-2.11737	-1.27891	-2.68449	-4.92946
SSPN	ENSG00000123096.7	59	7.05321e-14	3.63997e-12	2.63325	4.03707	2.66421	2.39209	4.24571	4.26375
CD44	ENSG00000026508.12	59	1.93652e-13	8.98556e-12	-2.4269	-4.63134	-4.055	-2.2496	-3.00632	-3.87268
PLOD2	ENSG00000152952.7	60	1.45317e-13	6.9278e-12	3.57317	1.82684	2.31537	1.88026	3.8495	1.70008
SCAF8	ENSG00000213079.5	60	5.69484e-12	1.91958e-10	1.36087	1.35087	3.39093	3.28	3.36186	2.33176
NDUFC2	ENSG00000151366.8	61	2.7794e-16	2.16226e-14	-3.905	-3.27711	-5.70382	-2.30201	-3.69683	-2.40345
ETV5	ENSG00000244405.3	61	5.12146e-14	2.6784e-12	3.46901	2.70426	3.5143	2.20343	3.10256	3.59476
HIST2H4A	ENSG00000183941.8	61	2.08059e-13	9.5971e-12	-2.83595	-2.83351	-1.40173	-2.48644	-4.78109	-2.43918
NDST4	ENSG00000138653.5	61	2.99613e-12	1.07209e-10	4.57554	4.32777	4.57554	4.57066	3.24249	4.57554
ARHGAP26	ENSG00000145819.11	62	3.76512e-16	2.84706e-14	3.58253	2.893	4.13058	3.19132	3.60361	3.63092
CHURC1	ENSG00000258289.3	62	2.19275e-13	1.00257e-11	-2.79869	-1.95044	-2.65752	-2.88146	-4.06202	-3.5017
SNX9	ENSG00000130340.10	65	9.36081e-16	6.77662e-14	3.08378	1.11073	2.92999	2.78916	2.37135	1.39797
GSTK1	ENSG00000197448.9	65	1.12985e-13	5.50903e-12	-3.35919	-3.83035	-2.17358	-2.86298	-4.00339	-4.70868
C15orf38-AP3S2	ENSG00000250021.3	66	1.14349e-13	5.55301e-12	3.90806	4.59297	5.24704	4.69275	5.0625	2.30213
AREG	ENSG00000109321.6	66	1.17781e-13	5.68438e-12	5.21056	3.99416	4.82696	4.33843	1.72844	5.36611
PEG10	ENSG00000242265.1	68	1.80658e-13	8.41767e-12	3.1344	2.8314	3.31242	2.44342	3.22517	3.51754
PTPN13	ENSG00000163629.8	68	1.15254e-12	4.59975e-11	1.64895	3.58082	3.35867	3.19119	2.99474	3.46798
MITF	ENSG00000187098.10	72	1.27644e-11	3.86067e-10	3.78885	3.8865	3.34444	3.75945	3.99982	2.67812
BLOC1S2	ENSG00000196072.7	74	3.62405e-13	1.59632e-11	-1.91961	-3.55123	-1.25707	-1.52832	-3.75136	-4.67238
SH3BGRL2	ENSG00000198478.6	75	8.97058e-12	2.8338e-10	3.35541	2.1281	3.42797	3.38496	3.65205	2.99427
SPRED2	ENSG00000198369.5	76	1.69188e-10	3.87916e-09	1.07231	2.36085	2.50686	3.13698	1.56344	2.87024
WIPI1	ENSG00000070540.8	77	4.15416e-15	2.68424e-13	4.40914	3.26305	1.54641	2.91376	4.22003	3.61715
IFITM3	ENSG00000142089.11	77	9.02913e-15	5.58057e-13	4.97707	-1.53571	-5.10589	-2.48149	-2.78377	1.39838
RPL22L1	ENSG00000163584.13	77	4.54116e-13	1.9562e-11	-2.40185	-4.25693	-1.28191	-2.99884	-2.54547	-6.07003
WFDC2	ENSG00000101443.13	82	1.02931e-12	4.16978e-11	3.79894	2.41155	1.58776	1.51348	4.58054	4.75943
NLK	ENSG00000087095.8	82	2.95522e-10	6.48118e-09	1.16268	2.20201	2.50048	2.52939	1.61818	2.22344
ADD3	ENSG00000148700.9	84	5.97063e-13	2.53703e-11	1.96128	-3.32791	3.42202	2.31117	2.38869	3.40466
CBWD3	ENSG00000196873.11	85	2.2731e-19	2.79877e-17	-3.76375	-1.89885	-1.05995	-1.53577	-2.87338	-2.64485
BST2	ENSG00000130303.8	85	2.50577e-12	9.13351e-11	-4.66337	2.86565	-3.30831	1.36976	-4.97482	3.3088
GOLGA8B	ENSG00000215252.7	85	2.46611e-11	7.02414e-10	-2.16979	-3.17627	-2.7131	-1.6423	-2.54805	-1.94346
EPCAM	ENSG00000119888.6	85	3.89441e-10	8.30789e-09	1.58241	1.36233	3.15963	3.33196	1.5924	1.40889
CAPN8	ENSG00000203697.7	86	4.31779e-10	9.1363e-09	2.27871	2.79932	1.45839	3.4305	2.3598	2.80375
NUDT19	ENSG00000213965.3	90	5.03383e-17	4.44712e-15	-5.55755	-1.62999	-3.32584	-1.87303	-3.59444	-4.81377
CAPS	ENSG00000105519.8	90	5.00312e-11	1.31707e-09	1.92118	2.81669	2.51869	2.34897	2.67664	2.66615
FAM9C	ENSG00000187268.7	90	8.07169e-11	2.00027e-09	3.70873	3.70873	3.70873	3.70873	3.70873	3.70873
ZBTB2	ENSG00000181472.4	92	5.06915e-10	1.05829e-08	2.72492	1.3911	3.07371	3.1124	2.3275	2.30434
REEP5	ENSG00000129625.8	93	5.45672e-12	1.85493e-10	-2.64736	-1.82274	-2.87143	-1.25438	-3.9914	-3.92399
FAM110C	ENSG00000184731.5	93	1.84797e-10	4.21235e-09	1.63034	2.01857	2.83726	2.79812	1.00545	2.93215
CBWD6	ENSG00000204790.8	94	5.70953e-12	1.92e-10	-2.62611	-2.85235	-1.22539	-1.86852	-3.64358	-1.99242
PLEKHA5	ENSG00000052126.10	96	1.26207e-18	1.36104e-16	-4.98782	1.82576	3.56683	2.26599	1.98286	2.64395
TIMM10	ENSG00000134809.4	96	6.57529e-12	2.151e-10	-3.43101	-4.04372	-3.97877	-1.18191	-4.98364	-4.18488
PTPN12	ENSG00000127947.11	97	2.61114e-13	1.18349e-11	2.9606	1.32216	3.99546	1.82955	3.48115	2.27601
MAP4K4	ENSG00000071054.11	100	3.67741e-13	1.61209e-11	2.75347	1.10137	3.59042	1.38328	1.20546	1.88875
MNAT1	ENSG00000020426.6	101	3.82455e-14	2.09107e-12	3.08279	3.10796	3.28254	3.09878	1.46238	2.64003
ADAM9	ENSG00000168615.7	101	9.58978e-10	1.8721e-08	2.93071	2.37551	1.9561	3.54194	2.03678	3.78592
PLCB4	ENSG00000101333.12	102	1.18388e-11	3.60864e-10	2.25208	1.94076	2.69493	2.32052	3.39337	1.66378
ANK3	ENSG00000151150.16	103	1.21722e-11	3.69585e-10	2.49984	1.74189	3.44471	2.61917	4.13738	1.24831
TRAF4	ENSG00000076604.10	107	2.60052e-11	7.35339e-10	2.34434	1.49035	2.43657	2.51667	2.81714	2.07293
SHPRH	ENSG00000146414.11	109	1.14439e-12	4.58844e-11	-1.30512	1.07413	3.43187	2.26936	2.85525	1.43672
ARSG	ENSG00000141337.8	112	2.6867e-11	7.56973e-10	3.10391	2.51334	1.79103	2.63495	3.49571	2.49815
SHANK2	ENSG00000162105.12	113	3.97429e-11	1.07705e-09	3.24611	3.32194	2.9282	2.5271	3.39106	3.40569
STK38L	ENSG00000211455.3	114	1.72135e-13	8.10747e-12	3.84448	1.55488	3.99232	3.00919	4.19353	2.03029
SOD1	ENSG00000142168.10	116	4.18891e-11	1.12546e-09	-2.07217	-1.94611	-2.16253	-1.13517	-3.5073	-1.94386
LAMA5	ENSG00000130702.9	117	3.88472e-09	6.40774e-08	1.90344	1.63519	1.847	2.28383	1.95317	1.71011
PSMB8	ENSG00000204264.4	118	7.36989e-17	6.22935e-15	5.35469	3.25467	1.62863	4.0194	1.826	3.53937
PSENEN	ENSG00000205155.3	118	3.48393e-12	1.22976e-10	-3.13394	-2.39842	-4.43974	-2.38272	-3.19833	-2.97734
PLEKHA2	ENSG00000169499.10	118	1.03508e-11	3.19873e-10	1.95624	1.47229	1.31666	1.93098	1.81647	2.61343
SUPT6H	ENSG00000109111.10	118	3.96937e-09	6.51301e-08	1.7855	1.66339	1.30392	2.62629	2.24498	1.31542
ZNF704	ENSG00000164684.9	119	6.15335e-11	1.57222e-09	1.42997	1.01208	2.31016	2.12407	1.61181	1.42457
NUP54	ENSG00000138750.10	120	3.64298e-12	1.283e-10	1.32876	1.77367	3.94198	2.09092	2.628	1.88334
NCALD	ENSG00000104490.13	120	5.26835e-11	1.37761e-09	3.57287	2.88382	2.23469	2.07656	3.96932	3.38426
KRT86	ENSG00000170442.7	120	2.39166e-10	5.32741e-09	2.79981	2.77983	2.78851	2.65709	2.8635	2.82584
GBP1	ENSG00000117228.9	122	6.79835e-12	2.2147e-10	4.47262	2.80745	3.90259	2.66361	2.77635	4.43543
GSTP1	ENSG00000084207.11	123	6.06175e-12	2.01248e-10	3.5551	-4.29593	5.04692	-1.3303	1.31262	4.43827
PPP3CA	ENSG00000138814.12	123	7.68388e-11	1.92553e-09	2.94078	3.2767	3.54826	1.22763	4.43148	-1.38903
NDUFB1	ENSG00000183648.5	124	7.05893e-11	1.78033e-09	-2.46868	-2.8074	-2.40346	-2.12805	-4.0221	-3.61496
KRT20	ENSG00000171431.3	125	1.08785e-09	2.07955e-08	3.98408	3.97679	3.98408	3.98408	2.8253	3.98408
SCNN1A	ENSG00000111319.8	126	7.22349e-10	1.45372e-08	2.53097	3.07893	2.99967	3.03903	3.01533	2.53959
FBXL20	ENSG00000108306.7	126	5.69388e-09	8.89463e-08	3.07791	3.24726	3.11538	3.44953	2.76714	2.6769
PGGT1B	ENSG00000164219.5	127	5.69602e-12	1.91958e-10	-3.25582	-1.06055	-1.70023	-1.16932	-2.14856	-4.19846
IRX2	ENSG00000170561.8	130	7.98885e-12	2.53906e-10	2.02833	1.94732	3.09268	1.39464	2.12906	2.80768
NXN	ENSG00000167693.12	130	3.08631e-11	8.5417e-10	2.30083	3.40754	3.67866	3.20339	3.67866	3.67866
CLNS1A	ENSG00000074201.4	132	8.39332e-12	2.65681e-10	-3.83818	-1.61619	-4.70257	-2.29879	-2.43356	-3.52065
RPL14	ENSG00000188846.9	132	2.56911e-11	7.29096e-10	-1.89873	-1.42933	-1.08132	-1.21747	-1.31053	-3.41517
NDUFA4	ENSG00000189043.5	132	1.05042e-10	2.53087e-09	-1.938	-1.66207	-1.14879	-1.92517	-3.28948	-2.75172
LYZ	ENSG00000090382.2	133	1.41591e-11	4.24149e-10	2.2828	1.93603	2.51968	1.95575	2.28932	2.52267
COX7C	ENSG00000127184.6	135	3.14668e-11	8.69341e-10	-2.16025	-1.79708	-2.0279	-2.06835	-2.60097	-3.36457
PALLD	ENSG00000129116.13	138	1.38129e-15	9.56446e-14	4.64305	2.6567	3.92386	1.19467	2.1263	-1.17359
BLVRB	ENSG00000090013.5	139	8.02797e-11	1.99259e-09	-1.09594	-3.75064	-1.17919	-2.98232	-4.98362	-5.39245
PNISR	ENSG00000132424.10	140	3.82464e-13	1.67056e-11	2.40787	1.20828	3.84415	2.76104	2.51767	2.34154
GSTA1	ENSG00000243955.1	140	3.92549e-11	1.06567e-09	4.18511	3.87733	4.18511	3.58266	3.41572	4.18511
TMED4	ENSG00000158604.10	141	1.07114e-13	5.28374e-12	-4.17797	-2.3507	-2.65063	-1.17369	-1.68619	-3.61391
CRYM	ENSG00000103316.6	141	1.56044e-09	2.87404e-08	3.58384	3.54429	3.60021	3.74298	3.94257	3.94257
AHR	ENSG00000106546.8	142	4.96069e-12	1.7011e-10	3.89829	3.50426	2.62256	2.48705	3.09276	3.85183
TTC17	ENSG00000052841.10	143	1.33704e-11	4.03201e-10	-2.8041	-2.84519	-3.65095	-2.4514	-3.23322	-3.36378
HMGA2	ENSG00000149948.9	143	3.72729e-09	6.16759e-08	2.32961	2.33333	2.33333	2.33333	2.33333	2.30348
STX1A	ENSG00000106089.7	144	2.35584e-09	4.15313e-08	2.44049	1.92717	2.53421	2.40939	2.33873	1.29518
TNF	ENSG00000232810.3	146	3.55517e-11	9.71892e-10	3.81916	1.24257	2.74037	3.14341	1.78524	3.86129
MUC19	ENSG00000205592.9	147	5.63001e-09	8.81246e-08	4.59825	4.34796	4.55048	4.48764	4.48763	4.59825
KATNA1	ENSG00000186625.9	148	2.3805e-11	6.80509e-10	1.08264	1.30957	3.57132	2.67077	2.64932	2.00679
PLCB1	ENSG00000182621.12	148	2.95024e-11	8.23801e-10	1.52293	2.74345	3.31742	2.78848	2.97142	3.31742
RPA3	ENSG00000106399.7	150	3.24733e-10	7.0136e-09	-1.92088	-2.90156	-1.69808	-1.79134	-4.08805	-2.48878
TPBG	ENSG00000146242.5	150	2.57854e-09	4.47014e-08	2.80519	2.22525	2.01489	2.8426	1.90276	2.93192
PLAUR	ENSG00000011422.7	154	3.2255e-11	8.84974e-10	4.27223	2.45433	4.45499	2.94344	3.75038	3.81938
MGST1	ENSG00000008394.8	155	4.5142e-11	1.20253e-09	-4.27107	-2.37206	-2.28412	-2.12485	5.66528	-3.36038
RBP1	ENSG00000114115.5	156	7.085e-15	4.41387e-13	-5.24574	2.08544	1.08538	1.69964	2.81356	2.67366
SPAG1	ENSG00000104450.8	156	4.29451e-08	5.34659e-07	1.20886	1.62945	2.48713	2.74955	1.74957	-1.84163
RPS23	ENSG00000186468.8	159	1.07425e-10	2.58432e-09	-1.40932	-1.91445	-2.21126	-2.066	-3.02329	-3.67349
TFPI	ENSG00000003436.10	159	5.22902e-09	8.31803e-08	1.87903	3.24505	3.63623	3.34984	-1.26586	3.39067
CEA	ENSG00000267881.1	161	3.26482e-09	5.46488e-08	3.07698	2.74048	3.06468	2.94363	3.10738	3.15478
PPP1R14C	ENSG00000198729.4	164	1.38834e-14	8.22327e-13	-5.32063	3.16948	3.5776	1.10225	3.5776	2.72884
LYST	ENSG00000143669.9	164	5.97152e-11	1.5358e-09	2.15029	1.69531	3.13495	1.61231	2.3746	2.39429
RPS3	ENSG00000149273.10	164	1.40222e-10	3.29469e-09	-2.00247	-1.31527	-1.7485	-1.52584	-1.46779	-2.30688
PGM3	ENSG00000013375.11	165	2.84814e-08	3.73941e-07	1.6681	1.07132	3.70228	3.36855	2.1928	1.3079
CLCA2	ENSG00000137975.7	166	1.44335e-08	2.03697e-07	2.18892	1.47735	2.59013	2.59013	2.59013	2.59013
SCAF11	ENSG00000139218.13	167	5.64761e-09	8.83116e-08	1.75209	1.12966	2.99868	2.44648	1.76825	3.62891
SGMS2	ENSG00000164023.10	170	8.1155e-10	1.60839e-08	2.05108	1.21394	2.85088	2.04207	3.00254	2.75257
ISG15	ENSG00000187608.5	172	6.82978e-11	1.73372e-09	1.40364	1.00352	-4.9206	-1.19118	-2.34248	-2.23578
RALB	ENSG00000144118.9	172	7.87941e-08	9.07293e-07	1.40395	1.1973	2.88881	3.19401	1.96732	2.10823
NLRC5	ENSG00000140853.11	173	2.90413e-14	1.62766e-12	5.27718	2.40004	3.91497	3.64182	3.16305	3.39175
DCTN1	ENSG00000204843.8	173	7.01983e-11	1.7762e-09	3.22388	3.07837	4.10313	3.25247	2.01206	3.30356
PSMB9	ENSG00000240065.3	174	3.55287e-14	1.9562e-12	5.07195	2.42454	2.03826	2.69672	1.89332	4.20889
TXNDC17	ENSG00000129235.6	175	7.12324e-11	1.79366e-09	1.43933	2.82753	4.89733	3.31802	1.93748	1.92427
SMARCA1	ENSG00000102038.11	175	1.15008e-09	2.18251e-08	1.22198	2.23345	1.76238	2.10917	2.73632	1.39315
TECR	ENSG00000099797.7	177	3.88085e-14	2.11445e-12	-4.61629	-2.9031	-2.10474	-1.59552	-3.70686	-2.86367
CTSL	ENSG00000135047.10	178	8.01057e-11	1.99144e-09	2.63063	3.63053	4.20964	3.44215	2.73716	2.8088
SERTAD2	ENSG00000179833.4	181	9.42929e-11	2.30384e-09	1.44135	1.90061	2.75341	1.6301	1.96347	2.68131
TMX2	ENSG00000213593.5	183	3.64109e-10	7.81011e-09	-2.72457	-2.60525	-3.10103	-1.58814	-2.52148	-4.97888
ST3GAL5	ENSG00000115525.12	184	1.12607e-07	1.2409e-06	1.89495	2.24546	1.86161	2.36594	2.03244	2.07789
PSMA5	ENSG00000143106.8	186	2.00331e-09	3.59808e-08	-2.40849	-1.91985	-1.34651	-2.02794	-4.02809	-3.81492
IGF2R	ENSG00000197081.8	191	1.60386e-10	3.69906e-09	1.79546	1.10253	2.77537	1.81108	2.40091	1.00757
LPHN2	ENSG00000117114.15	192	6.24208e-10	1.27591e-08	3.29138	2.91154	3.29138	2.45654	3.29138	3.29138
MAGED2	ENSG00000102316.12	194	1.56802e-07	1.64337e-06	1.21718	1.59827	2.49298	3.24841	-1.67198	3.32889
ARHGDIB	ENSG00000111348.4	198	1.78742e-08	2.46471e-07	-3.1822	-3.84754	-3.54519	-2.19321	-4.56059	1.69859
TNFAIP1	ENSG00000109079.5	199	2.73623e-10	6.04328e-09	1.24616	2.26666	3.32308	2.75536	2.41506	2.38013
MISP	ENSG00000099812.6	200	1.93034e-08	2.64778e-07	2.07007	2.56056	2.25194	2.02754	1.84504	1.43581
ELOVL5	ENSG00000012660.9	201	1.66793e-13	7.87956e-12	-4.35956	-2.22593	-1.75824	1.75325	-3.76355	-1.04949
NUP93	ENSG00000102900.8	210	4.22837e-10	8.97137e-09	3.30633	3.169	3.85018	2.58665	1.14948	2.41062
HIVEP2	ENSG00000010818.4	210	1.39717e-07	1.49641e-06	1.53552	1.20311	2.33456	2.27058	2.1681	1.4271
SMAP1	ENSG00000112305.10	212	4.70875e-10	9.8966e-09	1.35888	1.63744	3.03125	2.33929	2.53388	1.28177
AGO2	ENSG00000123908.7	214	5.04505e-10	1.05608e-08	1.4807	1.92416	3.4012	2.06868	1.26001	1.22228
ATOX1	ENSG00000177556.7	214	5.58815e-09	8.75569e-08	-3.00738	-1.02255	-1.93155	-1.14518	-3.57294	-3.41003
CD59	ENSG00000085063.10	214	1.52123e-07	1.60617e-06	-1.73003	-1.91756	-3.39722	-3.44473	-1.31791	-2.89218
COA3	ENSG00000183978.7	215	5.79112e-09	9.03751e-08	-2.06965	-1.93079	-1.54549	-1.53745	-3.81648	-3.35168
ZNF160	ENSG00000170949.13	216	3.29509e-08	4.24426e-07	1.28325	3.01015	2.18972	2.17809	1.91022	1.03046
NCOA7	ENSG00000111912.14	217	2.53425e-11	7.20511e-10	4.35959	-1.11148	4.37683	2.00347	3.95314	3.2108
B3GNT5	ENSG00000176597.7	217	3.91211e-09	6.43934e-08	2.26746	-1.09218	2.83441	1.09546	2.86179	2.76538
TMEM179B	ENSG00000185475.4	219	7.22132e-13	3.03548e-11	-4.27731	-2.79415	-1.63697	-2.14458	-2.13188	-4.49125
RP11-1407O15.2	ENSG00000174093.6	220	7.24379e-13	3.03676e-11	-3.31389	2.27311	2.04726	1.81871	2.66379	1.56543
SEC14L1	ENSG00000129657.10	220	1.40468e-08	1.99139e-07	2.99239	1.83906	1.84673	2.84373	1.3053	1.93001
ATP6V0E1	ENSG00000113732.4	222	1.49033e-09	2.75465e-08	-1.70674	-2.65145	-1.27983	-1.87786	-2.73279	-3.71104
CHCHD2	ENSG00000106153.12	222	4.12966e-09	6.7477e-08	-2.36105	-2.53527	-1.41743	-2.13666	-2.8598	-2.9315
COX8A	ENSG00000176340.3	224	1.52027e-08	2.13781e-07	-2.86208	-2.75935	-1.28671	-1.01057	-2.02935	-2.28819
GRHL1	ENSG00000134317.13	225	8.8306e-10	1.73909e-08	1.9852	1.62926	3.57581	2.30082	2.87628	2.16302
LMO7	ENSG00000136153.15	226	6.89861e-10	1.39372e-08	3.92073	1.77756	4.12268	3.38152	1.96149	2.84338
ATP6V1F	ENSG00000128524.4	226	6.6805e-09	1.02415e-07	-3.36994	-2.79767	-1.90122	-2.06067	-3.89275	-3.70656
CYP3A5	ENSG00000106258.9	226	5.75855e-08	6.8367e-07	1.53612	2.31286	2.11984	2.65899	2.88598	1.18573
ITPR2	ENSG00000123104.7	230	1.47774e-12	5.80588e-11	-2.58016	-1.45493	-1.62256	-2.05285	-2.43508	-1.58268
TAP1	ENSG00000168394.9	233	1.53842e-12	5.98413e-11	4.23583	2.72668	2.69709	2.55543	2.28761	3.1475
CHD6	ENSG00000124177.10	237	7.59709e-07	6.59098e-06	2.24873	1.21567	2.61768	2.98645	1.84445	3.24446
PCMTD1	ENSG00000168300.9	238	7.2816e-08	8.45304e-07	-1.5139	-3.11643	1.15038	-1.67108	-1.35778	-1.85004
TEAD3	ENSG00000007866.14	244	5.46952e-07	4.94948e-06	2.05498	1.66901	2.03521	2.0255	1.65478	1.91065
BTG1	ENSG00000133639.3	245	2.07383e-09	3.70188e-08	2.15836	-1.45493	3.47913	2.49485	-1.40537	1.45113
SGCE	ENSG00000127990.11	245	7.03684e-09	1.06727e-07	2.90939	2.90544	2.49207	1.26342	2.60598	3.17119
UBA52	ENSG00000221983.3	246	2.83601e-09	4.86724e-08	-1.82977	-1.81128	-1.87028	-1.70388	-2.46715	-2.79742
NKX3-1	ENSG00000167034.9	248	8.54746e-07	7.30364e-06	2.71584	-2.35564	2.84001	2.84783	2.73943	1.25861
DPYSL2	ENSG00000092964.12	250	2.38785e-09	4.18127e-08	1.34867	2.41538	3.80822	1.48115	2.10228	3.35568
B3GNT7	ENSG00000156966.6	250	2.92693e-09	4.96942e-08	2.5146	2.80831	3.19178	1.65473	3.16701	3.60353
HOOK1	ENSG00000134709.6	250	1.20393e-06	9.85133e-06	2.14169	1.38938	2.27133	2.59856	1.52426	1.64922
KIAA0753	ENSG00000198920.5	251	2.44937e-09	4.27942e-08	2.55049	2.72948	3.05918	2.32916	2.82909	2.87176
MTRF1L	ENSG00000112031.11	251	5.22849e-07	4.76444e-06	1.16152	1.39741	2.43869	2.31977	2.09864	1.32984
EIF3K	ENSG00000178982.5	252	2.97737e-09	5.03866e-08	-1.27798	-1.06053	-1.96296	-2.15836	-2.47204	-3.54798
KRAS	ENSG00000133703.7	254	2.56741e-09	4.45578e-08	1.93271	1.54029	3.45702	2.77641	2.94445	1.39817
LDLR	ENSG00000130164.7	259	1.462e-06	1.17057e-05	1.90581	-1.13061	1.1964	2.86726	2.52338	1.47667
PCF11	ENSG00000165494.6	261	1.53996e-07	1.6183e-06	-1.92641	-3.20497	-1.17314	-1.08268	-3.96581	-2.82287
LMO3	ENSG00000048540.10	263	6.95421e-12	2.24676e-10	-4.10966	1.37225	1.21009	1.06588	1.37225	1.0547
RPS13	ENSG00000110700.2	268	5.16116e-09	8.21845e-08	-2.25246	-2.25348	-2.02644	-1.85303	-2.3939	-3.04015
ACKR2	ENSG00000144648.10	273	2.2618e-08	3.06214e-07	2.79955	1.82377	2.86091	2.09226	2.97259	3.03362
SIX2	ENSG00000170577.7	274	5.67827e-07	5.11469e-06	1.66088	1.67074	1.80502	1.78072	1.79018	1.55914
MT1G	ENSG00000125144.9	275	8.0409e-09	1.20321e-07	3.64186	3.34963	-2.17236	3.53153	-2.55277	-1.03461
GPR126	ENSG00000112414.10	275	2.32396e-08	3.13274e-07	-1.52039	1.38977	2.4925	1.65686	2.4925	1.94769
RPS26	ENSG00000197728.5	276	7.28496e-10	1.46232e-08	-3.22544	-1.56737	-2.83454	-1.90192	-2.77688	-2.22072
KPNA5	ENSG00000196911.5	277	6.1797e-07	5.50296e-06	1.79205	1.85564	2.108	2.04923	1.77231	1.03417
CCL20	ENSG00000115009.7	279	1.46879e-07	1.55924e-06	3.30956	2.4219	3.30956	3.0808	3.22049	3.04417
API5	ENSG00000166181.8	281	1.33824e-11	4.03201e-10	-3.16781	-2.57659	-1.26847	-2.12285	-3.38236	-3.43552
PRKD3	ENSG00000115825.5	283	6.09695e-09	9.46753e-08	2.03439	1.902	3.01928	2.3113	2.99275	3.40646
RRBP1	ENSG00000125844.11	284	4.23719e-11	1.13454e-09	2.45537	1.56639	2.61613	1.8391	2.20781	2.48814
BTN3A2	ENSG00000186470.9	286	1.85885e-11	5.4637e-10	3.65713	2.46382	2.2482	2.26875	1.19202	1.86056
HELZ	ENSG00000198265.7	287	1.90781e-11	5.58659e-10	3.21267	1.18468	2.16604	2.16661	1.05415	2.67823
RPL24	ENSG00000114391.8	289	5.19755e-08	6.29928e-07	-1.6888	-2.52763	-1.00235	-1.36802	-1.94838	-2.70404
HLA-F	ENSG00000204642.9	290	2.26508e-11	6.53489e-10	3.85071	1.60295	1.12493	1.34283	1.56013	3.07841
SOX2	ENSG00000181449.2	295	2.51416e-07	2.49612e-06	1.72251	1.42333	1.72251	1.63309	1.66613	1.72251
MEIS1	ENSG00000143995.15	296	2.83652e-08	3.72728e-07	2.59635	2.06635	3.05538	2.5329	3.05538	3.05538
RP11-366L20.2	ENSG00000197301.3	300	6.76464e-07	5.93595e-06	2.10096	2.04743	2.11883	2.11883	2.11883	2.11883
LBR	ENSG00000143815.10	303	1.05509e-08	1.53473e-07	1.80032	-1.11368	3.1922	2.04323	2.33482	1.97622
LIN28A	ENSG00000131914.6	306	9.62064e-07	8.07504e-06	1.45246	1.52985	1.34863	1.54884	1.54044	1.53188
TAOK1	ENSG00000160551.5	307	5.74508e-08	6.82643e-07	1.09795	1.17601	2.59403	2.32364	1.62009	2.08252
PHF10	ENSG00000130024.10	309	1.23367e-08	1.76818e-07	1.34189	1.38807	2.73126	1.53149	1.01751	1.10225
MRPL15	ENSG00000137547.4	314	1.44219e-08	2.03697e-07	-1.68107	-3.24085	1.01575	-2.47262	-2.33819	-4.21666
WHSC1	ENSG00000109685.13	315	2.30549e-06	1.73907e-05	1.57606	2.12021	2.66995	2.56669	2.37048	2.1319
MDK	ENSG00000110492.11	317	1.62226e-09	2.97494e-08	-3.39257	1.90544	3.48244	1.47474	3.60919	3.63293
AFTPH	ENSG00000119844.10	322	1.51319e-07	1.59985e-06	1.54545	1.47507	2.52494	2.24108	1.72051	1.503
DAPP1	ENSG00000070190.8	328	8.94272e-11	2.18838e-09	4.29528	2.57623	3.81042	2.30055	3.07022	4.29383
DIDO1	ENSG00000101191.12	329	1.71408e-07	1.77621e-06	1.7448	1.32656	2.54325	2.24468	1.51298	1.95435
BTN2A2	ENSG00000124508.12	330	1.45532e-08	2.05016e-07	3.28611	2.59388	3.15546	2.90448	2.21957	2.41475
NDUFA13	ENSG00000186010.14	334	3.00669e-08	3.91471e-07	-2.361	-1.71454	-1.8094	-1.96355	-2.56608	-2.77702
GABRP	ENSG00000094755.12	334	4.94008e-06	3.4302e-05	1.78055	1.65862	1.99763	-4.00851	2.02879	2.02879
RPL15	ENSG00000174748.14	335	2.43165e-08	3.25825e-07	-1.90345	-1.86245	-1.5858	-1.08242	-1.19423	-2.57976
CPEB2	ENSG00000137449.11	338	5.4346e-06	3.71257e-05	1.55839	1.29523	1.62437	2.31094	1.51256	-1.33536
ARMCX6	ENSG00000198960.6	340	2.92457e-07	2.8387e-06	-2.40447	-2.78257	-1.54448	-1.0843	-2.99736	-2.02948
PRDX1	ENSG00000117450.9	345	2.37646e-07	2.37752e-06	-1.97788	-1.90228	-1.62124	-1.41507	-2.49394	-2.08235
RUFY3	ENSG00000018189.8	348	6.42537e-06	4.29557e-05	1.95633	1.80146	2.08922	2.27523	1.15316	1.12823
PDIA6	ENSG00000143870.8	351	1.33718e-08	1.90259e-07	2.70378	1.72064	3.31629	1.7446	1.91365	1.77622
PLK2	ENSG00000145632.10	352	2.78247e-07	2.72958e-06	-1.69904	-1.84205	1.17391	1.86403	-3.92481	-1.70498
CRNKL1	ENSG00000101343.10	358	1.82578e-06	1.42213e-05	1.41862	1.91064	2.70271	2.62835	1.44097	2.51907
TMEM2	ENSG00000135048.9	361	1.62283e-09	2.97494e-08	2.9346	1.35156	2.87193	2.62068	1.52462	1.01916
TALDO1	ENSG00000177156.6	363	1.39737e-06	1.12644e-05	-2.07255	-3.00613	1.90203	-1.41797	-1.89161	-2.54923
GBP5	ENSG00000154451.10	365	2.07971e-08	2.83278e-07	3.41993	2.60605	3.40395	2.85574	2.46384	3.27053
C15orf48	ENSG00000166920.6	369	4.32504e-08	5.37605e-07	2.07284	2.54972	2.95034	2.50937	2.14073	3.19249
FLAD1	ENSG00000160688.14	379	1.67973e-06	1.32456e-05	-2.76521	-2.98726	1.65741	-1.03154	-1.4681	-1.81066
RBPJ	ENSG00000168214.16	383	2.46929e-06	1.85369e-05	1.82259	2.87113	2.86119	1.81111	1.55514	1.4819
NDUFB2	ENSG00000090266.8	393	5.72928e-08	6.81735e-07	-2.17993	-1.50282	-1.22328	-1.67616	-2.28205	-2.87547
MFAP3L	ENSG00000198948.7	394	3.19255e-07	3.06645e-06	1.06719	1.90268	2.06223	1.74304	1.11071	1.83365
B3GNT2	ENSG00000170340.10	397	1.52746e-05	9.16886e-05	1.80579	1.71584	1.66409	2.3981	1.85446	2.04948
ZMYM6NB	ENSG00000243749.1	399	1.19731e-05	7.41771e-05	-1.47935	-2.20955	-2.34901	-2.54058	-3.28336	-3.62027
ABHD11	ENSG00000106077.14	402	8.43706e-08	9.63698e-07	1.87493	-1.31916	3.05146	1.5141	1.76478	-1.14275
PLEKHH2	ENSG00000152527.9	405	4.60943e-08	5.6754e-07	2.86461	1.96786	2.3409	1.86875	2.66908	2.74468
KCNJ12	ENSG00000184185.5	405	3.56855e-06	2.57268e-05	1.01666	1.14618	1.15182	1.15182	1.15182	1.15182
TRIP10	ENSG00000125733.13	410	9.18337e-08	1.03983e-06	1.24192	1.09682	2.10141	1.65769	2.02186	1.38179
OPN3	ENSG00000054277.8	411	4.59794e-07	4.25181e-06	2.31023	1.26355	2.05253	1.30498	2.47402	1.50605
H2AFJ	ENSG00000246705.3	413	9.26958e-07	7.8267e-06	-1.58872	-1.07764	-1.5728	-1.34965	-3.12811	-1.56054
VPS53	ENSG00000141252.15	416	9.69854e-08	1.09105e-06	1.19737	1.33774	2.19084	1.57313	1.3556	1.07039
C14orf2	ENSG00000156411.5	416	9.52947e-07	8.02869e-06	-2.05438	-1.07071	-2.04123	-1.20698	-2.80408	-2.36601
BACH1	ENSG00000156273.11	421	9.99727e-08	1.11822e-06	1.48145	-1.40217	2.83442	2.15077	1.49729	1.1369
PLAU	ENSG00000122861.11	422	5.29405e-06	3.63084e-05	2.37883	-1.42293	2.03531	2.31486	2.43551	2.23724
C11orf31	ENSG00000211450.5	424	5.45456e-06	3.72458e-05	-1.9844	-2.44544	-1.76777	-1.12115	-1.65076	-1.49918
NT5C2	ENSG00000076685.14	426	1.0991e-07	1.21719e-06	2.42223	2.04618	2.96675	1.82776	1.63458	2.74427
C15orf38	ENSG00000242498.3	433	2.01857e-06	1.54652e-05	1.59643	1.64324	1.70382	1.56715	1.7532	1.31256
MMD	ENSG00000108960.3	435	4.92065e-07	4.51021e-06	1.59639	1.52002	2.46813	2.11865	1.96077	2.28609
FEZ2	ENSG00000171055.10	442	1.45249e-06	1.16605e-05	1.40023	1.28593	2.37658	1.47094	2.77308	1.72922
HSD17B11	ENSG00000198189.6	443	2.83122e-06	2.08928e-05	2.16745	1.97027	2.51181	2.31584	1.78524	2.3917
LGALSL	ENSG00000119862.8	446	1.35972e-07	1.46131e-06	-1.04965	1.50258	2.92428	1.47842	2.49944	1.61974
KDM5A	ENSG00000073614.7	455	3.47415e-09	5.77315e-08	2.39722	1.7484	2.16519	1.9705	1.0533	2.65116
RAB22A	ENSG00000124209.3	458	1.54847e-07	1.62506e-06	1.49299	1.70521	2.73524	2.10239	2.15969	1.68554
TMBIM4	ENSG00000155957.12	462	3.95119e-09	6.49e-08	-3.61564	-2.68128	-3.2196	-1.5281	-2.95091	-3.28964
ST6GALNAC2	ENSG00000070731.5	467	1.26111e-05	7.75158e-05	1.88365	2.01787	2.01158	1.98272	1.68077	1.64578
ARSJ	ENSG00000180801.11	468	1.36737e-06	1.10728e-05	1.61341	1.45012	1.53279	1.06897	1.66588	1.63744
TANK	ENSG00000136560.9	473	2.02301e-07	2.05815e-06	1.66606	1.54989	3.5296	2.2598	1.44355	2.48339
PCGF1	ENSG00000115289.8	479	2.15721e-07	2.17909e-06	2.31158	2.01459	3.08251	2.18379	1.50738	1.13423
SSR4	ENSG00000180879.9	480	2.92404e-05	0.00016094	-1.83145	-1.59564	-2.02497	-2.51388	-2.41458	-1.59327
TBC1D3F	ENSG00000185128.11	488	1.21746e-05	7.5247e-05	-1.94883	1.47498	1.55247	1.56831	1.66202	1.50922
TMEM117	ENSG00000139173.5	497	2.9782e-06	2.18948e-05	1.89536	2.14335	1.90146	1.74572	2.28453	1.67431
TMEM214	ENSG00000119777.14	498	8.26642e-09	1.2314e-07	2.92729	1.75176	2.64616	1.89578	1.80658	2.80725
ADIPOR2	ENSG00000006831.9	500	7.13544e-06	4.71784e-05	2.31673	2.36727	2.08332	2.24223	1.66607	2.69284
ITCH	ENSG00000078747.8	506	2.67631e-05	0.000148878	1.89281	1.30213	1.87715	2.1678	1.36479	1.89403
GFPT1	ENSG00000198380.8	513	2.27173e-06	1.7166e-05	1.64686	2.03936	2.40374	1.24572	1.15653	1.82243
MLEC	ENSG00000110917.3	513	3.84302e-06	2.75152e-05	-1.68258	-1.27849	-1.85339	-1.1801	-2.43335	-1.94912
GTPBP2	ENSG00000172432.14	517	2.33178e-08	3.14058e-07	2.98488	1.5566	2.80231	2.00013	2.52315	1.601
ETV4	ENSG00000175832.8	530	2.84347e-07	2.77376e-06	1.20768	1.59127	1.88276	1.37853	1.68317	1.88696
TULP3	ENSG00000078246.11	539	5.24508e-07	4.774e-06	1.31668	1.49495	2.57327	1.09241	2.04675	1.2788
ULBP2	ENSG00000131015.4	544	5.29295e-07	4.81196e-06	2.1133	1.83846	2.43805	1.53715	2.16914	2.37206
TBC1D3	ENSG00000197681.8	546	1.97936e-08	2.70553e-07	-2.19649	1.20887	1.2855	1.19498	1.39591	1.15057
TMEM176A	ENSG00000002933.3	549	2.10421e-06	1.60348e-05	2.45451	2.2072	2.27553	1.40112	2.45451	2.45451
PPIP5K2	ENSG00000145725.15	559	7.97129e-06	5.19579e-05	-1.83799	-1.36933	-1.8397	-1.88626	-3.61837	-3.36596
RPL36AL	ENSG00000165502.6	561	4.05308e-06	2.88841e-05	-1.0228	-1.43837	-1.44068	-1.12012	-2.35292	-2.3308
BMP5	ENSG00000112175.6	562	7.7417e-06	5.06727e-05	1.59629	1.81924	1.81924	1.55491	1.81924	1.81924
POTEE	ENSG00000188219.10	564	1.06061e-05	6.67124e-05	1.61661	1.60597	1.61486	1.51694	1.33499	1.47719
CBX4	ENSG00000141582.10	569	7.57953e-07	6.58085e-06	1.46574	1.15605	1.68184	1.2205	1.15432	1.40697
PPP1R12C	ENSG00000125503.8	569	7.34896e-06	4.84263e-05	1.52283	1.41198	1.30985	1.33979	1.29475	1.3104
TBX5	ENSG00000089225.15	573	1.8063e-05	0.000105787	1.26179	1.3058	1.3058	1.3058	1.3058	1.3058
RORA	ENSG00000069667.11	574	9.5637e-06	6.10149e-05	1.54712	1.08684	1.27416	1.19672	1.83541	1.17821
DHX57	ENSG00000163214.16	575	9.60211e-06	6.121e-05	1.53095	1.48603	1.94822	2.07257	2.46155	2.02177
STAT1	ENSG00000115415.14	581	4.40409e-08	5.44832e-07	2.87375	1.69856	2.1917	2.04699	1.55764	2.36747
CXCL10	ENSG00000169245.4	590	4.28066e-07	3.98433e-06	3.44492	2.09116	3.41897	2.44551	3.02798	3.42533
TDO2	ENSG00000151790.4	612	7.86994e-06	5.13616e-05	1.88508	1.86429	1.92778	1.75245	1.92778	1.92778
PPFIBP2	ENSG00000166387.7	628	1.5543e-06	1.23499e-05	-1.80543	1.88984	2.84723	2.2748	2.33967	1.74612
PPP1R15A	ENSG00000087074.7	629	7.11874e-07	6.21876e-06	2.1794	-1.92423	1.02513	1.05659	-1.69891	1.08971
GDPGP1	ENSG00000183208.8	632	1.69314e-05	0.000100059	1.51536	1.7298	1.75805	1.65408	1.90768	1.71597
CRTC3	ENSG00000140577.11	633	3.03949e-05	0.000166422	1.34737	1.29264	1.35765	1.67482	1.78665	1.59288
LIF	ENSG00000128342.4	636	5.80969e-06	3.93784e-05	1.94995	1.6616	1.76834	1.29232	1.952	1.98889
TXLNA	ENSG00000084652.11	639	2.02446e-06	1.55027e-05	-2.205	-1.23546	-1.47513	-1.27873	-2.7527	-3.23324
ROCK2	ENSG00000134318.9	640	1.25444e-07	1.3622e-06	2.18434	1.85468	1.84053	1.03293	1.48747	1.16854
C3orf65	ENSG00000163915.3	641	1.32181e-05	8.0769e-05	1.74915	1.46189	1.70209	1.63056	1.74915	1.74915
NFKBIZ	ENSG00000144802.7	646	1.45467e-07	1.54739e-06	-2.86184	-2.01939	1.94417	1.68834	-1.09231	2.43864
COX14	ENSG00000178449.4	653	2.45756e-06	1.84577e-05	-2.52782	-1.6877	-1.13833	-1.28619	-2.22819	-3.01618
RALGAPB	ENSG00000170471.10	655	1.99873e-06	1.53432e-05	1.57458	1.3839	2.25355	1.81344	1.04333	1.38197
AL035252.1	ENSG00000268302.1	657	1.60571e-07	1.67725e-06	3.17483	1.65639	2.48884	1.74164	3.03917	3.1785
WDR83OS	ENSG00000105583.5	659	1.53405e-06	1.22014e-05	-2.4778	-1.54426	-1.7468	-1.58617	-1.4573	-2.49408
TSPAN12	ENSG00000106025.4	661	2.78374e-05	0.000154086	1.26211	1.73317	1.37489	1.4086	1.82208	-2.5537
C16orf89	ENSG00000153446.11	674	2.7356e-05	0.000151798	1.91257	1.5713	1.19557	1.95061	2.10879	2.05039
SRBD1	ENSG00000068784.8	679	0.000211296	0.000887468	1.2657	1.19101	1.62313	1.84388	1.17445	1.16099
UFL1	ENSG00000014123.9	681	4.72003e-06	3.29056e-05	1.52373	1.09828	2.45046	2.00872	1.18756	2.10354
KLHL5	ENSG00000109790.12	696	8.00737e-05	0.000383261	1.42363	1.60372	1.80237	1.73238	1.67469	1.84945
ENO2	ENSG00000111674.4	698	3.36487e-06	2.4416e-05	2.14629	1.60664	1.41905	1.05342	1.7321	2.19703
TSTD1	ENSG00000215845.6	712	4.78848e-05	0.000245179	-2.52695	-2.43741	-1.96955	-1.89751	-1.02377	-1.03069
STK35	ENSG00000125834.8	730	3.83264e-05	0.000202401	1.60639	1.6485	1.71234	1.81683	2.24271	1.18523
STXBP6	ENSG00000168952.11	740	5.99887e-05	0.000297603	1.49324	1.56555	1.56135	1.50864	1.51627	1.56555
ACTG2	ENSG00000163017.9	744	2.44103e-05	0.000137374	2.32115	2.18682	2.11181	1.98017	2.17642	2.32115
GMNN	ENSG00000112312.5	765	5.26357e-06	3.6131e-05	-1.35561	-1.22455	2.50359	1.21556	-1.44095	-1.44659
RP11-676J12.7	ENSG00000262003.1	766	2.18595e-05	0.000124842	1.14813	1.30132	1.43122	1.30172	1.43122	1.43122
CUL3	ENSG00000036257.8	767	5.30826e-06	3.63899e-05	1.1053	1.43842	2.80338	1.76458	-1.01404	2.43502
PJA1	ENSG00000181191.11	768	8.33243e-06	5.40191e-05	1.67229	1.51425	2.27829	1.84434	1.92903	2.37365
GMCL1	ENSG00000087338.4	771	5.82232e-06	3.94469e-05	1.27534	1.19964	2.52938	1.12459	1.30176	1.92857
PTAFR	ENSG00000169403.7	782	0.000104351	0.000483191	1.10682	1.52323	1.52002	1.48976	1.31461	1.56771
CHURC1-FNTB	ENSG00000125954.8	783	6.46985e-05	0.000318142	-1.4532	-1.26095	-1.81012	-1.05325	-2.6174	-1.92198
CA2	ENSG00000104267.5	796	7.78043e-06	5.08836e-05	-1.86123	1.74359	2.24453	1.78615	1.94899	-2.81052
UBE2C	ENSG00000175063.12	804	8.0734e-06	5.25577e-05	1.37874	1.7879	2.7475	2.25218	1.19135	2.00369
DERA	ENSG00000023697.8	809	8.59391e-06	5.54614e-05	1.101	2.02232	2.82251	2.30753	2.29758	1.05253
CCL4L1	ENSG00000205020.7	813	4.39912e-06	3.09303e-05	1.33373	1.08975	1.28517	1.08174	1.18171	1.28963
ENTPD6	ENSG00000197586.8	819	1.079e-06	8.96417e-06	2.63296	1.15742	2.14789	1.77769	2.33216	1.61323
SGPP2	ENSG00000163082.9	819	4.20825e-05	0.000218791	1.0843	1.05689	1.39943	1.2129	1.39943	1.1172
ZNF286A	ENSG00000187607.11	821	7.88931e-05	0.000378189	1.04398	2.21354	1.3979	1.735	1.20634	2.7977
TMEM108	ENSG00000144868.9	843	1.20936e-05	7.48053e-05	1.69213	1.23669	1.74581	1.48131	1.59397	1.73444
NFKBIE	ENSG00000146232.10	844	1.4569e-05	8.79255e-05	1.58081	1.63113	1.57356	1.39087	1.04189	2.11878
GOLT1B	ENSG00000111711.5	859	1.26816e-05	7.78937e-05	1.96466	1.33029	2.90548	2.05408	1.56356	1.25344
PFDN5	ENSG00000123349.9	859	1.60314e-05	9.57535e-05	-2.10669	-1.44574	-1.93262	-1.59173	-1.97901	-2.26188
ZKSCAN8	ENSG00000198315.6	870	3.02109e-05	0.000165641	1.51134	1.11506	1.18915	1.37342	1.01413	1.18779
ZNF165	ENSG00000197279.3	895	0.000168823	0.000731068	1.59249	-2.3323	-1.92771	1.25517	-4.51917	-1.5413
UGT3A2	ENSG00000168671.5	936	0.000210629	0.000885141	1.10488	1.03803	1.10488	1.10488	1.10488	1.10488
SPTSSB	ENSG00000196542.4	938	4.59484e-05	0.000236425	1.53167	1.32095	2.3034	1.4041	2.26628	-1.10683
AAK1	ENSG00000115977.14	953	0.000269624	0.0010988	1.19348	1.02726	1.41882	1.09317	1.98722	1.64557
AMMECR1	ENSG00000101935.5	959	3.07793e-05	0.000168083	1.76657	1.67091	2.09068	1.74551	1.32361	1.88108
GAS8	ENSG00000141013.10	969	2.84709e-05	0.000157259	1.53936	1.34584	2.15349	1.51274	1.31742	1.02626
RBPMS	ENSG00000157110.11	979	9.79392e-05	0.000457293	-1.69585	1.7068	1.30268	1.24448	-1.24704	1.9465
PLXDC1	ENSG00000161381.9	983	0.000143465	0.000637862	1.79873	1.75761	1.74038	1.65579	1.83445	1.83908
TRAF3IP2	ENSG00000056972.14	1020	6.5115e-05	0.000319687	1.81493	1.18254	2.44775	2.11391	1.96135	1.00326
MAP7	ENSG00000135525.14	1025	0.000655082	0.00235375	-1.08321	1.14826	1.64326	1.56818	1.51072	-1.15174
CD200R1	ENSG00000163606.6	1031	0.00018928	0.000805817	1.10227	1.15208	1.17415	1.1048	1.17415	1.17415
AC007382.1	ENSG00000268688.1	1040	0.000220601	0.000922583	1.17316	1.45511	1.83386	1.23129	1.83386	1.6121
RNF31	ENSG00000092098.12	1043	0.000444928	0.00169073	1.54466	1.53346	1.74837	1.50552	2.19043	1.46802
YIPF3	ENSG00000137207.7	1068	3.53283e-05	0.000188542	2.31137	1.04192	2.75601	2.13974	1.17781	1.61403
SRGN	ENSG00000122862.4	1086	1.13511e-05	7.07722e-05	1.83034	-1.58603	1.45478	1.0979	-1.28827	1.56918
MIPEP	ENSG00000027001.7	1098	0.00108415	0.00361854	1.20366	1.93368	1.42425	1.70837	1.97095	1.41549
CAPN2	ENSG00000162909.13	1109	6.56215e-05	0.000321669	1.78095	-1.01971	2.47004	-1.39586	1.89871	1.39544
UBE3D	ENSG00000118420.12	1126	7.24634e-05	0.000350591	1.29606	1.26805	1.57905	1.14237	1.29052	1.23396
AGPAT9	ENSG00000138678.6	1131	0.00077145	0.00270656	1.63401	1.11258	1.71907	1.64862	1.72551	1.16064
GINS2	ENSG00000131153.4	1143	0.00122078	0.00400112	1.51416	1.70126	1.21269	1.68524	-1.59179	1.34894
TMEM41B	ENSG00000166471.6	1161	0.000265886	0.00108498	-1.91073	-1.38347	1.29422	1.91984	-1.26785	-1.2704
EMC7	ENSG00000134153.5	1193	0.000140238	0.000625911	-1.22278	-1.38569	-1.33698	-1.23638	-1.29892	-2.88902
POLG	ENSG00000140521.7	1211	0.00018215	0.000780349	1.63848	1.43732	1.88416	1.64563	1.73771	1.15392
NAPB	ENSG00000125814.13	1216	0.00108378	0.00361806	1.1567	1.05867	1.19557	1.18976	1.42257	1.31313
GRIA4	ENSG00000152578.8	1231	0.000829859	0.00288431	1.14213	1.29419	1.31434	1.31434	1.31434	1.31434
ZNF146	ENSG00000167635.7	1265	0.000200191	0.000847194	-2.00101	-1.3553	-1.01483	-1.19811	-2.31164	-3.03385
BTN3A1	ENSG00000026950.12	1292	4.80313e-05	0.000245767	1.93017	1.13084	1.69151	1.57436	1.08227	1.44928
CNPY3	ENSG00000137161.12	1332	5.42193e-05	0.000272701	2.04544	1.12163	1.63959	1.55325	1.22596	1.6336
BPTF	ENSG00000171634.12	1336	6.47737e-05	0.000318411	1.54505	1.04351	1.97452	1.16058	-1.22894	1.2333
C12orf5	ENSG00000078237.4	1339	0.000194946	0.000826339	1.85508	1.42167	2.27813	1.63755	1.55128	-1.22084
GJB7	ENSG00000164411.6	1379	0.000341753	0.00134835	1.51129	1.23156	1.53409	1.3677	1.41158	1.53409
STARD4	ENSG00000164211.8	1381	0.000121388	0.000551144	1.74823	1.26784	1.75341	1.44902	1.46046	1.38827
TIMM9	ENSG00000100575.9	1428	9.80582e-05	0.000457576	2.26689	1.52829	2.20317	1.12129	1.561	-1.18538
GGA2	ENSG00000103365.11	1475	0.000590519	0.00215545	-1.54361	-1.23986	-1.2644	-1.09601	-1.79081	-2.30047
PDLIM1	ENSG00000107438.4	1693	0.000765516	0.00268937	-1.86792	-1.45835	-1.22347	1.03371	1.86573	2.11179

## Sheet: C5
# Supplementary table 4.5. DEGs of lncRNA subtypes (C5)
Name	Ensembl_ID	Top	p.value	FDR	logFC.1	logFC.2	logFC.3	logFC.4	logFC.6	logFC.7
SEPP1	ENSG00000250722.1	1	6.37139e-42	2.49074e-38	-9.24057	-3.10237	-3.92659	-1.04432	-6.94134	-6.49845
TFF3	ENSG00000160180.14	1	3.29266e-41	1.02975e-37	-2.12701	-2.19534	-5.76931	-9.2493	-3.84681	-3.63841
TRIM2	ENSG00000109654.10	5	4.7746e-17	6.17029e-15	3.3401	4.31783	4.40281	3.51126	4.78482	4.24937
S100A10	ENSG00000197747.4	6	6.79625e-37	1.32841e-33	7.35028	2.04559	3.0406	2.05799	1.55917	4.4765
FOXA1	ENSG00000129514.4	6	2.33406e-21	5.28952e-19	-4.48107	-4.4983	-1.84727	-3.81082	-3.92916	-4.92821
RAB11FIP1	ENSG00000156675.11	7	3.7725e-24	1.3109e-21	-2.39523	-1.75741	-6.17799	-4.85512	-2.55805	-2.58433
WWP1	ENSG00000123124.9	8	1.98883e-16	2.3383e-14	-3.10282	-1.98994	-3.93955	-1.27154	-5.33588	-3.91323
MLPH	ENSG00000115648.9	9	9.94848e-20	1.86427e-17	-5.35215	-4.61129	-4.9957	-4.31961	-5.4768	-4.633
ITGB8	ENSG00000105855.5	12	1.03714e-15	1.09579e-13	3.93095	4.062	3.33461	2.34271	5.48426	4.80529
HEBP2	ENSG00000051620.6	13	1.07148e-14	9.36021e-13	-1.02564	-1.15924	4.03439	1.10665	2.90021	1.39419
PPP1R1B	ENSG00000131771.9	14	6.70826e-23	1.94254e-20	-6.93497	-2.3447	1.72644	-6.15324	1.41891	1.5368
BST2	ENSG00000130303.8	19	9.50398e-15	8.39625e-13	-6.03314	1.49588	-4.67807	-1.36976	-6.34459	1.93903
AGR2	ENSG00000106541.7	20	2.19401e-18	3.3635e-16	-2.04784	-4.13456	-4.72038	-6.49371	-3.85004	-3.0471
DUSP10	ENSG00000143507.13	22	1.75602e-13	1.12077e-11	-3.18488	-4.82186	-2.87391	-4.59151	-2.36074	-3.57251
GPNMB	ENSG00000136235.11	24	1.57604e-13	1.01002e-11	5.27461	2.73973	5.30323	4.09168	5.07507	4.27079
LGALS1	ENSG00000100097.7	25	2.60657e-13	1.56765e-11	3.94643	5.59556	1.56441	5.54645	1.09654	3.57973
ECI2	ENSG00000198721.8	27	4.37544e-14	3.16753e-12	-2.43148	-1.85508	-1.54407	-2.52115	-5.53051	-3.45144
ELOVL5	ENSG00000012660.9	29	2.27345e-23	7.10999e-21	-6.1128	-3.97918	-3.51149	-1.75325	-5.5168	-2.80273
GSTP1	ENSG00000084207.11	29	3.6217e-13	2.12107e-11	4.8854	-2.96563	6.37722	1.3303	2.64292	5.76857
CYB5A	ENSG00000166347.14	30	1.56613e-14	1.2755e-12	-5.66195	-4.27627	-3.06287	-3.39915	-2.5213	-5.3361
PAM	ENSG00000145730.16	31	4.98654e-13	2.80484e-11	4.84376	5.3093	5.42529	4.35093	5.15468	2.35011
ACADSB	ENSG00000196177.8	33	1.86768e-23	6.08436e-21	-5.60953	-1.83611	-2.59728	-1.21799	-3.81415	-4.15714
NUDT4	ENSG00000173598.9	33	1.09121e-16	1.33306e-14	-3.6366	-2.70786	-1.43176	-2.4243	-5.05359	-3.38585
GALNT7	ENSG00000109586.7	33	1.13091e-13	7.5251e-12	-1.95722	-3.29021	-1.47609	-4.10911	-1.98019	-2.06171
RHOB	ENSG00000143878.8	33	2.41716e-12	1.17019e-10	-1.38247	-3.7198	-2.52489	-3.26015	-3.6028	-1.31762
CRIP1	ENSG00000213145.5	34	1.10333e-13	7.43656e-12	3.6709	-2.24929	-3.12072	2.42282	-6.35946	2.87355
MARCKS	ENSG00000155130.5	34	7.5674e-13	4.08039e-11	-2.46392	-1.85121	3.84254	-1.87948	3.02492	1.14099
EFNA5	ENSG00000184349.8	37	1.241e-12	6.44704e-11	4.28446	3.76844	5.19618	4.91748	5.38323	5.11283
EHF	ENSG00000135373.8	40	4.97795e-12	2.24971e-10	-2.47904	-2.98508	4.70499	-1.43823	1.50681	-1.71184
FOXP1	ENSG00000114861.14	41	5.03392e-13	2.82134e-11	-1.44119	-2.48379	-1.71413	-3.45231	-1.54832	-3.07605
GABRP	ENSG00000094755.12	41	2.19779e-12	1.07733e-10	5.78906	5.66713	6.00614	4.00851	6.0373	6.0373
RAB27B	ENSG00000041353.5	43	7.77815e-13	4.17962e-11	-1.46359	-1.65408	-1.40798	-3.35422	-1.84182	-2.48822
ANXA1	ENSG00000135046.9	45	9.82977e-12	4.23438e-10	5.49306	3.3053	5.71615	-1.49157	5.37642	3.06659
FXYD5	ENSG00000089327.10	46	1.55408e-12	7.86447e-11	3.71236	1.50602	4.64886	5.26132	3.66258	3.91745
PARD6B	ENSG00000124171.4	46	1.80886e-11	7.38514e-10	-2.92107	-1.72679	-4.02043	-1.34848	-4.52574	-3.69519
SFRP1	ENSG00000104332.7	49	8.08217e-12	3.54008e-10	3.5337	2.81377	3.58856	3.59196	3.58569	3.59196
MIA	ENSG00000261857.2	50	8.06302e-12	3.54008e-10	6.15147	6.05467	6.07203	6.15147	6.028	6.15147
APOD	ENSG00000189058.4	52	4.96888e-12	2.24971e-10	2.45452	-3.39867	-4.3036	2.4686	-6.18537	2.98868
IFI6	ENSG00000126709.10	54	7.58981e-11	2.71583e-09	1.31637	1.64527	-4.90829	1.69725	1.5437	1.91904
TSPAN1	ENSG00000117472.5	64	2.101e-17	2.93334e-15	-4.0178	-1.91793	-2.3253	-2.40654	-6.24267	-6.13542
UGDH	ENSG00000109814.7	65	9.9289e-19	1.6343e-16	-4.99095	-2.71035	-1.65474	-2.91725	-3.01509	-2.38055
OLA1	ENSG00000138430.11	65	4.23628e-11	1.60007e-09	-1.40303	-1.58542	1.39054	-1.75643	-4.3113	-2.75784
MGP	ENSG00000111341.5	67	2.51992e-10	7.81826e-09	-5.361	7.40245	-3.29189	6.37382	-1.50184	8.79367
TSPAN13	ENSG00000106537.7	69	4.8858e-10	1.40182e-08	-1.82477	-2.37539	-3.59082	-1.7221	-2.17067	-2.72132
ATP8B1	ENSG00000081923.6	70	5.6939e-11	2.09495e-09	-1.72206	-2.34335	-2.00119	-2.90399	-2.70171	-2.53669
COL6A1	ENSG00000142156.10	74	8.40565e-11	2.96034e-09	2.98852	2.54628	2.82986	2.95375	2.98852	2.84576
FAM214A	ENSG00000047346.8	74	6.57609e-10	1.81679e-08	-2.28793	-4.26942	-2.86429	-1.5151	-4.10333	-1.10017
UGCG	ENSG00000148154.5	77	1.88965e-14	1.49992e-12	-4.09808	-2.87701	-1.97576	-2.34965	-5.45656	-2.49344
TMED3	ENSG00000166557.8	77	8.0019e-11	2.8309e-09	-1.48647	-1.9316	-1.32769	-1.18368	1.3234	-4.08913
DSG3	ENSG00000134757.4	79	2.398e-10	7.51073e-09	3.69467	3.69256	3.64834	3.6869	3.69803	3.69468
CHI3L1	ENSG00000133048.8	80	7.8118e-11	2.78253e-09	5.03819	3.99323	4.32912	4.99427	5.03819	4.98588
SERPINA3	ENSG00000196136.12	80	1.6332e-09	4.0796e-08	3.28036	2.88753	-4.96745	3.22192	-2.02696	2.85239
APP	ENSG00000142192.16	81	3.08164e-10	9.37502e-09	1.82503	2.23427	2.94637	3.29766	1.88489	1.82802
CRYAB	ENSG00000109846.3	82	8.88975e-10	2.3826e-08	5.04157	4.63428	5.06191	4.88912	3.46887	1.02029
VIM	ENSG00000026025.9	83	1.85107e-09	4.55829e-08	3.9897	1.83277	4.25674	3.13767	2.78174	3.96844
NUCB2	ENSG00000070081.11	84	1.9076e-09	4.67541e-08	-2.07807	-4.08522	-4.33255	-1.31568	-3.73571	-3.09486
PRDX3	ENSG00000165672.5	85	9.68076e-11	3.34907e-09	-3.93819	-2.31857	-1.28412	-1.51145	-3.87793	-3.91561
KLK8	ENSG00000129455.11	85	6.84647e-10	1.88152e-08	4.79293	4.57538	4.88187	4.88187	4.67832	4.88187
MEAF6	ENSG00000163875.11	87	1.37299e-09	3.52169e-08	-1.75318	-3.56396	-1.24755	-2.30537	-2.77584	-3.22896
RAP2C	ENSG00000123728.5	88	9.15888e-17	1.14164e-14	-4.7255	-1.54822	-2.6803	-2.2328	-3.61464	-1.75043
CMBL	ENSG00000164237.4	92	1.64653e-16	1.95051e-14	-3.22118	-1.50419	-1.45792	-1.04837	-3.02413	-3.74386
FABP7	ENSG00000164434.7	96	2.81137e-09	6.43651e-08	1.59526	-4.93051	1.59411	1.6248	1.63954	1.63954
PRLR	ENSG00000113494.12	97	4.3643e-16	4.84004e-14	-2.87688	-1.88041	-1.95515	-2.89863	-3.68942	-4.02102
PPP1R14C	ENSG00000198729.4	98	4.72907e-16	5.20764e-14	-6.42287	2.06723	2.47535	-1.10225	2.47535	1.62659
FAM46A	ENSG00000112773.11	100	1.02304e-09	2.69315e-08	1.87469	-3.39174	-2.71901	-3.86987	-1.24338	-1.01151
SLC6A14	ENSG00000087916.7	104	4.45545e-09	9.60963e-08	2.70351	2.24844	2.89751	1.81172	2.89751	2.88498
ARL4C	ENSG00000188042.5	106	1.67164e-08	3.12299e-07	2.14173	1.25113	3.00126	2.33984	2.68572	2.7916
KRT18	ENSG00000111057.6	108	1.42865e-09	3.64433e-08	-2.64287	-3.20988	-2.58245	-2.91269	-4.0785	-2.36827
DNAJA4	ENSG00000140403.8	111	4.49712e-09	9.67282e-08	-1.67374	-3.53364	-2.52105	-1.03551	-5.26535	-1.30236
COA1	ENSG00000106603.13	112	1.79117e-09	4.41776e-08	-1.80391	-3.07016	-1.58136	-1.02123	-4.2655	-3.23571
KLK5	ENSG00000167754.8	113	5.57327e-09	1.17769e-07	4.28794	3.64829	4.28794	4.28794	4.28794	4.28794
PHACTR2	ENSG00000112419.10	114	7.01853e-15	6.38074e-13	-4.16283	1.60927	1.006	-1.54202	1.27754	-1.86059
BUB3	ENSG00000154473.13	120	2.83133e-09	6.4633e-08	-2.56284	-2.90287	-1.78485	-2.25749	-3.95432	-3.78353
MYB	ENSG00000118513.14	121	1.38476e-14	1.14569e-12	-2.82905	-1.76173	-1.82631	-1.44343	-2.50942	-1.17418
NQO1	ENSG00000181019.8	122	3.01704e-09	6.80772e-08	-2.40761	-2.49567	-1.1515	-1.68889	-4.85902	-3.6408
SCD	ENSG00000099194.5	127	3.34397e-09	7.46996e-08	-3.48588	-3.41376	-2.38018	-3.42808	-1.82184	-2.49521
SCPEP1	ENSG00000121064.8	131	1.27584e-12	6.60608e-11	4.768	1.55924	3.82936	2.56889	3.51599	3.65644
UAP1	ENSG00000117143.9	134	3.19109e-08	5.52592e-07	1.17425	-3.33934	1.81758	-1.15498	-1.81061	1.57745
NDUFV2	ENSG00000178127.8	136	2.75512e-09	6.33555e-08	-2.33399	-2.76902	-2.03555	-1.78089	-3.04049	-3.60753
FAM96A	ENSG00000166797.6	137	2.79772e-09	6.41464e-08	-3.35339	-1.93819	-1.91998	-1.5463	-1.72738	-3.98388
IFITM2	ENSG00000185201.12	138	4.82447e-08	7.93273e-07	4.62002	1.59375	-4.55408	2.59939	-2.40174	2.04615
EIF4G2	ENSG00000110321.11	140	4.2595e-08	7.13125e-07	-1.45849	-2.76291	-1.26813	-1.64029	-2.5952	-1.86706
XBP1	ENSG00000100219.12	141	1.22349e-07	1.76167e-06	-2.79991	-2.30276	-3.46299	-1.3448	-3.16632	-3.34515
SOX10	ENSG00000100146.12	145	2.89793e-08	5.08585e-07	2.49867	2.37933	2.49867	2.49867	2.49867	2.49867
TUFT1	ENSG00000143367.11	153	1.46451e-08	2.78258e-07	1.06793	-2.55789	-1.23528	-1.14187	-4.26009	-2.34028
AHNAK2	ENSG00000185567.6	155	5.01508e-08	8.20301e-07	2.90613	2.70959	2.82517	2.90613	2.57633	1.68001
ZMYND8	ENSG00000101040.15	161	1.37462e-12	7.06592e-11	-3.4291	-1.92596	-1.37591	-2.1486	-1.69159	-1.77385
SPDEF	ENSG00000124664.6	164	2.50518e-11	9.94251e-10	-2.85762	-2.18787	-2.18989	-2.79013	-2.58876	-3.35906
GTF2A2	ENSG00000140307.6	166	1.78206e-12	8.87455e-11	-4.53969	-2.73123	-1.07664	-1.58495	-2.81466	-3.42147
TRIM29	ENSG00000137699.12	171	3.01339e-08	5.25897e-07	2.79185	2.5251	2.72351	2.52347	2.87128	2.87128
HBS1L	ENSG00000112339.10	184	1.03108e-11	4.42941e-10	-4.2642	-2.09746	1.84983	-2.39374	-1.69332	-1.45425
QRICH1	ENSG00000198218.6	184	1.51733e-08	2.87245e-07	-1.67789	-1.84953	-1.64738	-1.92611	-2.06966	-2.99126
AFF4	ENSG00000072364.8	185	1.22957e-07	1.76393e-06	-1.04163	-2.03402	-2.27518	-2.59035	-3.06732	-1.76189
SNRK	ENSG00000163788.9	189	1.87143e-07	2.5249e-06	-1.40299	-2.60684	-1.93143	-1.73471	-1.60474	-3.22658
PTEN	ENSG00000171862.5	190	8.01882e-10	2.17691e-08	-3.42513	-2.60942	-2.29174	-1.87815	-3.49929	-3.26402
PI15	ENSG00000137558.3	194	6.99289e-08	1.08265e-06	1.63808	1.63808	-4.16266	1.51314	1.26845	-4.41732
KIAA1324	ENSG00000116299.12	200	9.38784e-07	1.0117e-05	-1.17135	-2.61464	-3.02879	-1.49598	-2.28026	-2.15316
NDRG2	ENSG00000165795.16	201	2.36737e-07	3.10298e-06	2.33645	1.78462	2.43707	2.47456	2.45585	2.56465
SLC43A3	ENSG00000134802.13	202	2.23772e-08	4.04523e-07	3.12991	1.15003	2.77948	2.79581	2.31707	2.78495
IFNGR1	ENSG00000027697.8	205	1.76594e-09	4.3624e-08	-3.72802	-2.25833	1.34613	-3.52638	1.24357	-1.6031
GPRC5B	ENSG00000167191.7	210	5.45851e-11	2.01784e-09	-4.23024	1.95409	2.30644	1.58911	1.75872	2.47467
EIF1B	ENSG00000114784.3	212	2.78139e-07	3.54597e-06	-1.70935	-3.22099	-1.50035	-1.86532	-1.88221	-2.63648
FOXC1	ENSG00000054598.5	213	1.16586e-07	1.69114e-06	2.10219	1.99333	1.96343	1.96605	2.06391	2.06296
MXD1	ENSG00000059728.6	215	1.35986e-07	1.9327e-06	-1.05265	-1.34138	-2.00516	-2.2345	-4.24279	-1.27007
CHI3L2	ENSG00000064886.9	218	1.99487e-07	2.67138e-06	3.1189	1.85729	2.95164	3.27027	2.72021	3.27027
ID4	ENSG00000172201.6	222	3.23885e-07	4.01074e-06	1.86122	-2.90115	1.74591	1.49468	1.95696	1.94237
AARD	ENSG00000205002.3	222	4.54588e-07	5.40562e-06	1.10881	2.41938	2.69463	2.84707	1.8563	2.75632
KIF16B	ENSG00000089177.13	225	1.57507e-10	5.18513e-09	-2.71926	-1.19625	-1.92291	-2.04524	-2.21601	-1.10738
KRT15	ENSG00000171346.9	232	2.12384e-09	5.08583e-08	4.52998	1.32029	1.94524	3.49891	2.01412	4.328
KRT6B	ENSG00000185479.5	232	5.14063e-07	6.01227e-06	2.63665	2.35751	2.62596	2.62867	2.63665	2.63665
PSMA3	ENSG00000100567.8	233	1.70677e-07	2.3309e-06	-1.58865	-1.43438	-1.40959	-1.86276	-3.19771	-2.33255
PLXDC2	ENSG00000120594.12	235	1.04233e-06	1.10877e-05	2.17206	2.10744	2.18429	2.14043	2.056	2.18576
KHDRBS3	ENSG00000131773.9	236	1.4662e-06	1.4878e-05	1.19844	1.2594	2.83261	2.90734	2.65994	2.11216
SCYL2	ENSG00000136021.13	238	1.99985e-07	2.67138e-06	-1.56758	-1.12456	-1.20834	-1.84187	-3.27624	-1.16225
DMKN	ENSG00000161249.16	238	8.4837e-07	9.28989e-06	2.93978	2.53922	1.58375	3.14267	1.31831	2.69807
TSC22D1	ENSG00000102804.10	241	7.13919e-08	1.10203e-06	-3.37958	-3.35044	-1.84131	-1.69236	-1.72468	-2.87806
CTGF	ENSG00000118523.5	244	1.22967e-06	1.27933e-05	2.4441	2.24751	2.80457	2.18111	2.81055	2.81055
PLEKHF2	ENSG00000175895.3	247	4.50327e-08	7.49124e-07	-2.74064	-1.03628	-1.15316	-2.9578	-3.2069	-1.37112
EN1	ENSG00000163064.6	251	1.37061e-06	1.40812e-05	1.25426	1.19841	1.26105	1.26105	1.26105	1.23842
USP3	ENSG00000140455.12	252	5.73303e-08	9.17579e-07	-3.20917	-3.09932	-1.09214	-2.11799	-1.45069	-2.89565
TACSTD2	ENSG00000184292.5	253	1.31316e-06	1.35716e-05	2.29184	-1.2304	2.27396	3.06545	1.02682	1.37869
FIBP	ENSG00000172500.8	258	5.3012e-10	1.50297e-08	-3.28215	-1.33495	1.26846	-1.25022	-1.65234	-3.09859
AKIRIN1	ENSG00000174574.11	259	8.1215e-07	8.9308e-06	-1.33409	-2.44435	-1.02685	-2.02721	-1.67903	-1.32133
ZNF91	ENSG00000167232.9	262	3.62188e-08	6.16942e-07	-2.92024	-2.97191	-2.50774	-2.6332	-1.64812	-4.07758
SYNM	ENSG00000182253.10	265	4.92443e-06	4.18952e-05	2.13561	2.06911	2.19232	2.06131	1.97382	1.68213
ERRFI1	ENSG00000116285.8	268	1.61724e-06	1.61366e-05	1.10971	-1.07604	-1.88581	-2.95035	-1.65626	-2.02719
NCCRP1	ENSG00000188505.4	269	3.50114e-06	3.15183e-05	1.33594	2.08507	2.29588	2.29588	2.02804	2.15673
AC090186.1	ENSG00000232941.1	272	1.62752e-06	1.61952e-05	-3.22234	-1.12342	1.80588	3.84999	-1.06177	-1.33711
COPB1	ENSG00000129083.8	274	3.70692e-06	3.2916e-05	-1.98005	-1.78472	-2.83172	-2.26547	-2.81976	-2.65639
TIMM10	ENSG00000134809.4	279	5.49537e-07	6.37945e-06	-2.2491	-2.86181	-2.79686	1.18191	-3.80173	-3.00297
SERPINB5	ENSG00000206075.9	280	1.49356e-07	2.09837e-06	3.07229	2.93307	2.19432	2.78635	2.46089	3.15564
KIAA0040	ENSG00000235750.5	281	1.29781e-06	1.34635e-05	-1.24866	-2.56532	-2.01297	-2.0128	-1.74259	-2.43641
AP3M1	ENSG00000185009.8	284	1.62703e-09	4.0707e-08	-2.62354	-1.83327	-1.56216	-2.134	-3.19038	-2.52708
DSC3	ENSG00000134762.12	288	2.05942e-06	2.0002e-05	2.00747	1.97471	2.00544	2.00747	2.00747	2.00283
ISG15	ENSG00000187608.5	289	1.02915e-05	7.88094e-05	2.59482	2.1947	-3.72942	1.19118	-1.1513	-1.0446
PPP3CA	ENSG00000138814.12	292	7.13574e-07	7.97581e-06	1.71315	2.04906	2.32062	-1.22763	3.20385	-2.61666
RDX	ENSG00000137710.10	295	2.24489e-09	5.32006e-08	-3.36861	-1.32019	1.30994	-1.87228	-1.45349	-2.63695
CALB2	ENSG00000172137.14	322	5.57315e-06	4.66528e-05	1.89281	1.81215	1.89281	1.82827	1.0109	1.89281
KRT23	ENSG00000108244.12	332	4.06548e-07	4.90903e-06	2.31194	-1.81382	2.05069	1.73902	1.98028	2.48035
CXorf61	ENSG00000204019.4	339	3.75596e-06	3.31631e-05	2.19901	2.19901	2.19901	2.19901	2.19901	2.19901
HLA-DRA	ENSG00000204287.9	360	7.43263e-06	5.98168e-05	2.5991	-3.40851	-1.24639	-4.08626	-2.83319	3.18863
SFXN2	ENSG00000156398.8	368	5.92084e-06	4.92469e-05	-1.56042	-2.15871	-1.06221	-1.16	-2.32676	-1.46156
CD2AP	ENSG00000198087.7	370	2.47884e-08	4.43497e-07	-2.68928	-1.34038	1.42704	-1.82654	-1.52802	-1.45126
PRELP	ENSG00000188783.5	373	3.70905e-06	3.29163e-05	2.14086	2.08911	1.97607	2.16023	2.15505	2.10066
BPI	ENSG00000101425.8	373	7.44991e-06	5.9925e-05	2.62261	2.56681	2.62261	2.62261	2.62261	2.62261
PLS3	ENSG00000102024.13	374	2.7529e-06	2.55472e-05	2.03318	2.29291	1.57236	1.83202	2.58774	-1.46412
CPNE8	ENSG00000139117.9	383	1.77667e-05	0.000125482	2.25951	1.65761	2.25951	2.02271	2.11134	2.22954
CLTA	ENSG00000122705.12	384	4.28838e-05	0.000265144	1.14552	1.79145	2.84414	1.20727	1.73878	1.43463
MALL	ENSG00000144063.3	388	2.39437e-05	0.000162574	1.41896	-1.02676	1.56232	1.33158	1.56232	1.52512
ZNF521	ENSG00000198795.6	398	1.13915e-05	8.5845e-05	1.62758	1.54043	1.62758	1.62459	1.62758	1.62758
CD74	ENSG00000019582.10	403	1.5443e-05	0.000111231	3.53333	-3.11985	-3.62972	-3.29101	-2.81434	3.28691
MYO6	ENSG00000196586.9	405	5.93979e-07	6.80942e-06	-2.15029	-2.06854	-1.50292	-1.99111	-1.40852	-2.13929
SHC4	ENSG00000185634.7	412	2.34416e-05	0.000159719	1.63062	1.65694	1.69483	1.63707	1.69483	1.67696
RASEF	ENSG00000165105.9	416	2.51928e-06	2.37027e-05	-1.87572	-1.25879	-1.20936	-2.07286	-2.32648	-2.79789
GLYATL2	ENSG00000156689.2	416	1.41466e-05	0.000103176	1.24825	-3.28408	1.33365	1.35584	1.50709	1.50709
KRT17	ENSG00000128422.11	416	1.66039e-05	0.000118447	2.24876	2.21712	2.21246	1.99298	2.00705	2.24876
S100A1	ENSG00000160678.7	429	3.62892e-05	0.000230766	1.21254	1.11141	1.26524	1.26524	1.1501	1.19023
PLA2G4A	ENSG00000116711.8	433	1.52146e-05	0.00010994	1.98543	1.98222	1.98543	1.89816	1.98543	1.98543
NUPR1	ENSG00000176046.7	437	1.0407e-07	1.53233e-06	3.29544	-1.2153	1.23321	2.17164	1.30335	-1.10887
UBE2N	ENSG00000177889.5	438	1.10326e-07	1.61382e-06	-3.29451	-2.34867	-1.29346	-1.62365	-3.16111	-2.80599
CHMP5	ENSG00000086065.9	439	2.25708e-06	2.15998e-05	-2.03173	-1.38857	1.94836	1.00682	-2.06516	-2.78209
NPY1R	ENSG00000164128.2	442	1.10467e-05	8.365e-05	1.95122	2.05077	1.08898	1.97147	2.06676	1.46226
POLR3E	ENSG00000058600.11	449	1.66844e-05	0.000118858	-1.5502	-2.48578	-2.2178	-2.3433	-1.58876	-2.10118
ECHDC1	ENSG00000093144.14	460	9.93948e-05	0.000537055	-1.24483	1.94732	2.31437	1.81205	1.48598	-2.3478
CRABP1	ENSG00000166426.7	466	1.79641e-05	0.00012682	1.72478	1.55108	2.16172	2.55956	2.35826	2.55956
ISLR	ENSG00000129009.8	468	2.79925e-05	0.000185169	1.7602	1.67859	1.7602	1.7602	1.72609	1.7602
SMIM22	ENSG00000267795.1	471	1.89278e-07	2.5493e-06	-3.6949	-1.56017	-3.14149	-1.4603	-2.8502	-3.21465
CALML5	ENSG00000178372.6	482	3.26832e-05	0.000211447	2.20128	-2.43137	2.20128	-1.7094	2.20128	2.20128
RBBP7	ENSG00000102054.13	489	1.22696e-05	9.12318e-05	-1.9835	-2.20723	-1.42711	-1.30258	-3.37539	-2.87561
ARPP19	ENSG00000128989.6	492	3.55499e-06	3.18092e-05	-2.36411	-2.38336	-1.14097	-1.38297	-1.9475	-2.68662
DAZAP2	ENSG00000183283.11	495	4.60243e-05	0.000281566	-1.90574	-2.36397	-1.10998	-2.32536	-1.31932	-1.88829
SOX6	ENSG00000110693.11	499	0.000119847	0.000630992	1.57238	1.24484	1.68964	1.59357	1.48133	1.64564
KLK7	ENSG00000169035.7	501	3.02282e-05	0.000197525	2.32357	2.04458	2.32357	2.32357	2.32357	2.32357
B3GNT5	ENSG00000176597.7	506	7.90411e-05	0.000444113	1.172	-2.18765	1.73895	-1.09546	1.76632	1.66992
UBE2K	ENSG00000078140.9	513	4.02062e-07	4.85861e-06	-2.846	-1.13057	1.06706	-1.70023	-1.73291	-2.7525
PVRL2	ENSG00000130202.5	513	1.66527e-05	0.000118687	-1.89414	-1.0017	-1.07172	-2.05835	-2.82291	-1.02688
ATP5J	ENSG00000154723.8	515	1.70398e-05	0.000121059	-1.53107	-1.22288	1.07818	1.79637	-1.94507	-1.11248
ROPN1	ENSG00000065371.13	516	3.56601e-05	0.000227228	2.00124	2.02627	2.02627	2.02627	2.02627	2.02627
PSMD14	ENSG00000115233.7	521	4.80104e-07	5.66595e-06	-2.76664	-1.59615	1.56929	-1.45245	-1.44039	-2.49237
KRT14	ENSG00000186847.5	525	3.76853e-05	0.000237999	2.46904	2.39697	2.44657	2.46904	2.46904	2.46904
KRT5	ENSG00000186081.7	527	4.79012e-05	0.000291225	1.37805	1.27855	1.41635	1.41635	1.41635	1.41635
PIP4K2A	ENSG00000150867.9	529	9.9134e-07	1.06321e-05	-2.79772	-1.7819	-1.9603	-2.66191	-2.49524	-1.63938
NCOA7	ENSG00000111912.14	538	6.49508e-05	0.000377981	2.35612	-3.11495	2.37336	-2.00347	1.94967	1.20733
KRT81	ENSG00000205426.6	543	3.97971e-05	0.000249222	2.49265	2.30836	2.41258	-2.50102	2.50776	2.49354
A2M	ENSG00000175899.10	547	3.77536e-05	0.000238055	3.25204	2.81001	2.9927	3.05648	3.20636	3.17487
S100A2	ENSG00000196754.6	566	8.90364e-05	0.000490925	1.82897	2.22046	2.19823	1.77775	2.2604	1.93483
PSMC2	ENSG00000161057.6	571	9.53647e-06	7.40139e-05	-1.92464	-1.65811	1.05224	-1.12703	-2.43955	-3.38876
KRT16	ENSG00000186832.4	572	3.26109e-05	0.000211209	2.03626	2.03626	1.94964	1.96315	2.03626	2.03626
TMEM79	ENSG00000163472.14	578	0.000304425	0.00140463	1.30343	1.43559	1.80481	1.62371	1.49652	1.17995
SPG11	ENSG00000104133.10	586	0.000102175	0.000549798	-1.92212	-2.25958	-1.1434	-1.08478	-2.65937	-1.15104
2019-09-02	ENSG00000168385.13	593	0.000110328	0.000588003	-1.01192	-2.16035	1.68288	-1.53857	-1.95034	-1.75526
TIMP3	ENSG00000100234.11	595	0.000109623	0.000584642	2.22613	2.13512	-2.6507	2.31275	-1.21444	1.51525
MMP7	ENSG00000137673.4	603	5.54356e-05	0.000330353	3.14431	2.89415	3.0366	3.15298	3.15298	3.15298
UBE2B	ENSG00000119048.3	615	1.49217e-05	0.000108023	-1.04907	-2.4797	-1.61729	-2.06158	-2.17536	-2.83948
TPM2	ENSG00000198467.9	618	5.92174e-05	0.000348375	1.6643	1.46583	1.57775	1.46544	1.59822	1.69978
ST8SIA1	ENSG00000111728.6	628	9.49153e-05	0.000516085	1.65541	1.19872	1.58853	1.62335	1.51683	1.69326
VEZT	ENSG00000028203.13	628	0.000143298	0.000738545	-1.43265	-2.37846	-1.69299	-1.2565	-2.13446	-1.57185
BGN	ENSG00000182492.11	656	0.000154051	0.000786195	1.8773	1.60533	1.96387	1.9435	1.94792	1.98113
TLR5	ENSG00000187554.7	661	3.99516e-05	0.00024969	1.30886	1.13419	1.56691	1.41445	1.89775	1.89775
YWHAQ	ENSG00000134308.9	664	0.000179564	0.000897362	-1.41986	-1.11048	2.27326	-1.80143	-1.79883	-1.27225
S100B	ENSG00000160307.5	675	0.000144235	0.000742642	2.16181	1.62938	2.14431	2.02948	2.16181	2.16181
ADAMTS1	ENSG00000154734.10	688	0.000209946	0.0010272	1.32021	1.17696	1.73323	1.73526	1.73526	1.46698
TMEM47	ENSG00000147027.3	691	0.000126969	0.00066402	1.17058	1.64676	1.43711	1.48845	1.63941	1.49735
OSBPL3	ENSG00000070882.8	695	7.92347e-05	0.000444881	1.5591	1.46302	1.48523	1.24244	1.22588	1.6432
KLK6	ENSG00000167755.9	697	0.00019033	0.000941536	1.87652	1.81728	1.98249	1.96549	1.98249	1.98249
VGLL1	ENSG00000102243.8	700	0.000216046	0.00105375	2.03617	1.79888	2.06683	1.9727	2.06683	2.06683
GMNN	ENSG00000112312.5	701	2.94156e-05	0.000193327	-2.57117	-2.44011	1.28803	-1.21556	-2.65652	-2.66215
ST3GAL6	ENSG00000064225.8	714	0.000100106	0.000540523	1.84836	1.35196	1.7839	1.79871	1.91936	1.91936
KLK10	ENSG00000129451.7	750	0.000276063	0.00129129	1.61647	1.41187	1.61647	1.14492	1.59888	1.61647
ROPN1B	ENSG00000114547.5	761	9.03671e-05	0.000496337	1.82124	1.9996	1.95131	1.85705	2.12888	2.12888
RNF145	ENSG00000145860.7	769	0.000369661	0.00166151	1.56581	-2.14014	1.50012	-1.6421	1.03506	-1.64646
SAA1	ENSG00000173432.6	776	9.97848e-05	0.000538976	3.24584	2.72794	2.82231	2.76491	3.24584	2.93954
SYAP1	ENSG00000169895.5	793	1.32132e-05	9.71256e-05	-1.70751	-1.40538	-1.42718	-1.12357	-1.71014	-1.52103
TRMT112	ENSG00000173113.2	793	0.000224156	0.0010872	-1.76943	-1.1069	1.60863	1.35759	-2.02418	-1.13756
PLEKHB2	ENSG00000115762.12	799	8.93872e-05	0.000492164	-1.36375	-2.2945	1.4582	-1.29554	-1.85466	-2.92404
CCDC107	ENSG00000159884.7	799	0.00124126	0.00460171	1.53773	1.27294	1.75361	1.65626	1.15444	1.44816
TNFAIP2	ENSG00000185215.4	806	0.000473891	0.00204816	1.89359	1.34401	-2.35899	-3.1454	-1.06931	1.24755
PSMC6	ENSG00000100519.7	828	0.000304086	0.00140348	-1.09764	-2.01787	-2.01585	-1.69437	-3.01506	-1.67314
FBXO32	ENSG00000156804.3	841	2.12665e-05	0.000146819	2.60294	-1.38304	1.90192	-1.20681	-1.992	-1.11439
LEMD1	ENSG00000186007.5	841	0.000482299	0.0020799	1.47267	1.7906	1.7669	1.29913	1.74375	1.74298
MPZL2	ENSG00000149573.4	847	0.0016602	0.00583907	1.56795	1.43078	2.13711	1.86979	1.30129	1.24959
C5orf46	ENSG00000178776.4	867	0.00064278	0.00264922	1.59192	1.4842	1.59192	1.46374	1.59192	1.53807
RTP4	ENSG00000136514.2	883	0.000151096	0.000774143	1.77965	1.56228	1.37129	1.26503	1.77965	1.77965
SGCE	ENSG00000127990.11	903	0.000111877	0.000595649	1.64597	1.64201	1.22865	-1.26342	1.34256	1.90777
UBE2V1	ENSG00000244687.7	925	0.000127971	0.000668365	-1.67883	-1.44489	1.00734	-1.16997	-1.1035	-2.20868
HORMAD1	ENSG00000143452.11	926	0.000517205	0.00220549	1.25233	1.14999	1.25233	1.25233	1.25233	1.25233
ALDOC	ENSG00000109107.9	963	0.000163623	0.000827748	-1.06513	1.63809	1.15259	-1.37891	1.1723	1.85961
KDELR3	ENSG00000100196.6	973	5.13726e-05	0.000310297	2.24318	1.84322	1.71274	1.78168	2.02109	1.65293
ZNF567	ENSG00000189042.9	981	0.000961549	0.00371161	1.98944	1.85091	1.82535	2.19051	2.20064	1.84882
RPA2	ENSG00000117748.5	1008	0.00251994	0.00834836	-1.94231	-1.46346	1.88658	1.63256	-1.0636	-1.60387
SAA2	ENSG00000134339.4	1023	0.00148888	0.00534259	1.5288	1.6195	1.6835	1.6245	1.6835	1.3944
ATP5F1	ENSG00000116459.6	1031	0.000230808	0.00111351	-1.71016	-1.14623	2.18641	1.40892	-1.45479	-2.09276
INHBA	ENSG00000122641.9	1038	0.000485774	0.00209142	1.53064	1.41818	1.43105	1.54674	1.59691	1.58902
THBS2	ENSG00000186340.10	1041	0.000582929	0.00244115	1.28838	1.20972	-1.2835	1.32883	1.32159	1.33154
NNMT	ENSG00000166741.3	1081	0.00165561	0.00582684	1.65178	1.44562	1.65178	1.61849	1.59664	1.34541
OPRK1	ENSG00000082556.6	1112	0.00121339	0.0045197	1.23431	1.18505	1.23431	1.21514	1.23431	1.23431
PPP1CA	ENSG00000172531.10	1132	0.00167984	0.00589755	-1.85585	-1.74859	-1.92988	-1.1589	-1.9311	-1.47923
SCRG1	ENSG00000164106.3	1143	0.00069242	0.00282257	1.39782	1.31029	1.10044	1.12835	1.18809	1.01356
MMP2	ENSG00000087245.8	1154	0.00158309	0.00562099	1.34183	1.11654	1.34183	1.33254	1.03821	1.34183
RNF144B	ENSG00000137393.8	1201	0.000527024	0.0022382	-1.89231	-2.1188	-1.25472	-1.73715	-1.98108	-2.96726
SOSTDC1	ENSG00000171243.7	1246	0.000846824	0.00334389	1.45515	1.3211	1.28359	1.38748	1.45515	1.45515
MKI67IP	ENSG00000155438.7	1254	0.000701881	0.00285518	-1.55253	-1.09231	1.06997	-1.27124	-2.2981	-2.57456
TMBIM4	ENSG00000155957.12	1278	0.000284612	0.00132573	-2.08754	-1.15318	-1.69149	1.5281	-1.4228	-1.76153
COX7A1	ENSG00000161281.6	1327	0.00170605	0.00597078	1.0537	1.0537	1.0537	1.0537	1.0537	1.0537
COL8A1	ENSG00000144810.11	1462	0.00265938	0.00872163	1.01734	1.01102	1.01809	1.00971	1.0204	1.00582
CDH19	ENSG00000071991.4	1467	0.00239824	0.00799771	1.29975	1.29975	1.27477	1.29975	1.29975	1.29975
PTX3	ENSG00000163661.3	1469	0.00262383	0.00863766	1.02702	1.01954	1.02702	1.01808	1.02702	1.02702
MRPL24	ENSG00000143314.8	1831	0.00240221	0.00800926	2.05406	-1.62062	1.8038	1.04718	1.56176	-1.0619

## Sheet: C6
# Supplementary table 4.6. DEGs of lncRNA subtypes (C6)
Name	Ensembl_ID	Top	p.value	FDR	logFC.1	logFC.2	logFC.3	logFC.4	logFC.5	logFC.7
CRIP1	ENSG00000213145.5	1	7.699e-33	1.71985e-29	10.0304	4.11016	3.23873	8.78227	6.35946	9.23301
CAPG	ENSG00000042493.11	2	4.33289e-26	3.56597e-23	5.80212	4.62184	2.82862	6.58501	3.50968	7.43608
APOD	ENSG00000189058.4	3	1.75795e-21	6.39281e-19	8.63989	2.7867	1.88177	8.65397	6.18537	9.17406
KPNA2	ENSG00000182481.4	3	3.12913e-18	6.30632e-16	5.22775	5.04198	6.82256	3.61966	5.72901	4.25904
SLPI	ENSG00000124107.5	6	5.73416e-21	1.82659e-18	-2.25796	-7.22232	-1.67499	-5.67902	-4.88336	-5.21088
EIF1	ENSG00000173812.6	6	8.33498e-20	2.32739e-17	4.20681	2.70795	2.89897	4.54047	3.38685	2.65886
OLA1	ENSG00000138430.11	6	2.61957e-17	4.4442e-15	2.90827	2.72588	5.70184	2.55487	4.3113	1.55346
SYCP2	ENSG00000196074.8	6	1.3794e-15	1.63407e-13	2.3801	2.06263	5.34623	4.19184	4.40364	6.39095
HSP90AA1	ENSG00000080824.14	7	1.18056e-19	3.18282e-17	3.34673	1.47973	2.14652	1.30354	2.46128	3.27001
NGFRAP1	ENSG00000166681.9	7	1.84484e-18	4.00664e-16	-5.49593	-6.82	-6.42907	-3.38581	-5.8774	-2.72803
AK4	ENSG00000162433.10	8	1.76374e-29	3.06439e-26	-5.18249	-2.67793	-1.87834	-3.15686	-2.03782	-5.45726
CLU	ENSG00000120885.15	8	8.35168e-22	3.26488e-19	1.83373	2.45101	2.32782	7.30851	7.05368	2.74583
FTL	ENSG00000087086.9	8	1.7713e-16	2.71547e-14	2.87869	1.32582	3.51619	1.10942	1.47963	1.1057
WWP1	ENSG00000123124.9	8	1.98883e-16	3.01935e-14	2.23306	3.34594	1.39633	4.06434	5.33588	1.42265
HSPA1B	ENSG00000204388.5	8	8.18384e-16	1.03202e-13	6.11443	2.59921	4.06749	1.45815	4.42424	6.75539
RPL27	ENSG00000131469.8	9	3.1457e-18	6.30632e-16	2.61885	2.44131	2.41037	4.46052	1.86782	1.23051
MGST1	ENSG00000008394.8	9	6.37592e-16	8.30836e-14	-9.93634	-8.03733	-7.94939	-5.66528	-7.79013	-9.02566
DNAJC1	ENSG00000136770.6	10	6.36715e-16	8.30836e-14	1.92919	3.81745	3.33581	2.58751	4.11152	3.19157
GPRC5A	ENSG00000013588.5	10	2.421e-15	2.666e-13	2.97222	1.03164	3.09382	3.58566	2.80273	6.8256
IER3	ENSG00000137331.11	11	2.64316e-17	4.4442e-15	5.08991	3.80747	1.2982	1.35522	4.67349	5.59947
S100A6	ENSG00000197956.5	11	9.79283e-16	1.21532e-13	-5.69282	-1.20135	-6.93621	-8.95033	-8.2104	-5.00727
HSPD1	ENSG00000144381.12	11	2.20022e-15	2.45748e-13	2.29085	1.89133	4.82709	1.78242	2.79765	1.3057
PVRL4	ENSG00000143217.7	13	6.93625e-18	1.29122e-15	-4.48985	-5.74078	-2.19206	-4.28881	-4.62933	-2.57977
HIST1H2BK	ENSG00000197903.6	14	3.68484e-26	3.20111e-23	5.91269	3.38584	4.07437	5.77248	4.99149	2.02318
YBX3	ENSG00000060138.8	14	3.1425e-18	6.30632e-16	-3.36478	-4.87804	-2.937	-5.11354	-5.14835	-4.8725
GOLIM4	ENSG00000173905.4	16	2.57245e-16	3.72457e-14	-4.99818	-2.31948	-2.05725	-1.58126	-3.06203	-4.7487
HIST1H2BC	ENSG00000180596.7	18	6.61252e-15	6.50315e-13	7.20523	4.06924	4.82449	6.75985	6.94624	4.4798
KRT19	ENSG00000171345.9	19	9.46686e-19	2.24293e-16	3.1473	1.49626	1.14622	4.97572	1.33792	2.66278
NVL	ENSG00000143748.13	19	1.97431e-14	1.70565e-12	2.37744	1.89177	4.80834	3.45011	3.39564	2.2509
TCEAL8	ENSG00000180964.12	20	5.84061e-21	1.82659e-18	-4.2965	-4.42893	-2.64114	-4.43355	-4.25025	-4.00075
HIST1H2BG	ENSG00000187990.4	20	1.09516e-14	1.04421e-12	7.39092	4.64015	6.81613	6.73494	6.9865	6.52079
TCF7L2	ENSG00000148737.11	21	8.72154e-24	4.87067e-21	-4.58478	-1.36296	-2.35075	-3.82957	-3.52407	-2.44123
VAT1	ENSG00000108828.11	22	2.3826e-16	3.54826e-14	4.07487	5.47012	5.09821	4.8352	2.61389	1.78939
RBBP6	ENSG00000122257.14	24	1.73136e-14	1.55593e-12	3.30478	2.49518	3.90116	3.44236	4.03155	4.86462
ANKRD30B	ENSG00000180777.9	24	8.46727e-14	6.86024e-12	4.79185	5.78042	5.09896	5.80925	5.9206	-1.36001
ARL17B	ENSG00000228696.4	25	4.43769e-15	4.72056e-13	5.77385	4.593	5.28855	5.9016	5.68585	5.19089
MGP	ENSG00000111341.5	25	2.97257e-14	2.51254e-12	-3.85916	8.90429	-1.79005	7.87565	1.50184	10.2955
CHCHD7	ENSG00000170791.13	27	1.66328e-15	1.88469e-13	4.99479	3.13033	4.48494	3.56153	3.66815	3.27057
ECI2	ENSG00000198721.8	27	4.37544e-14	3.65875e-12	3.09904	3.67543	3.98645	3.00936	5.53051	2.07907
S100A13	ENSG00000189171.9	28	6.92134e-16	8.87122e-14	3.68337	5.1709	2.02927	1.66673	1.85772	1.23084
BAG3	ENSG00000151929.5	28	1.91523e-14	1.6731e-12	6.02903	1.83227	4.95533	2.04124	5.80078	5.43182
DHRS2	ENSG00000100867.10	29	5.76986e-13	3.71289e-11	5.63344	6.07856	5.2132	6.36055	6.26424	6.14395
C1orf63	ENSG00000117616.13	30	3.40529e-22	1.40128e-19	5.8602	2.65445	4.54334	3.16237	4.00668	4.38611
JUP	ENSG00000173801.12	30	6.46739e-20	1.83874e-17	4.29852	2.46395	4.33035	3.80741	3.94519	2.5206
PPP1R10	ENSG00000204569.5	31	3.05324e-18	6.30632e-16	4.62402	1.6484	3.12549	4.16652	4.50582	2.81352
PDLIM5	ENSG00000163110.10	32	2.42828e-16	3.58217e-14	-1.36911	-4.71733	-2.04456	-4.98081	-3.91346	-4.09363
NUDT4	ENSG00000173598.9	33	1.08111e-13	8.49513e-12	1.417	2.34573	3.62183	2.6293	5.05359	1.66775
CRIM1	ENSG00000150938.5	34	4.42417e-13	2.93241e-11	-1.37926	-1.42291	-3.46389	-2.97476	-2.97129	-4.20284
AARSD1	ENSG00000266967.2	35	2.20849e-16	3.32059e-14	5.31286	4.40672	4.75113	5.41852	4.12591	1.78896
MAGED2	ENSG00000102316.12	35	1.47712e-13	1.12125e-11	2.88916	3.27025	4.16496	1.67198	4.92039	5.00087
CACYBP	ENSG00000116161.13	35	4.42571e-13	2.93241e-11	3.35469	1.04505	5.05042	1.66111	3.43163	2.52477
HUWE1	ENSG00000086758.11	36	6.75164e-13	4.29268e-11	2.23773	2.08379	3.5389	1.35587	1.88832	1.35918
STMN1	ENSG00000117632.16	37	6.97329e-13	4.37578e-11	2.28884	1.95264	5.47146	2.12403	2.43035	5.43514
HIST1H2AC	ENSG00000180573.8	38	1.66211e-15	1.88469e-13	4.42647	1.40278	2.84527	5.25625	3.72246	1.31568
SEPHS2	ENSG00000179918.15	38	8.86839e-13	5.33365e-11	2.5012	1.52211	4.26665	2.38645	3.52979	3.12245
KITLG	ENSG00000049130.9	39	4.06834e-13	2.75397e-11	2.66022	5.61464	3.88221	4.62454	5.38208	3.55732
PCNA	ENSG00000132646.6	39	9.80011e-13	5.80471e-11	3.5915	2.00664	5.74662	1.12277	4.88819	2.96277
HIST2H2AA4	ENSG00000203812.2	40	3.22652e-14	2.71254e-12	4.52835	1.32673	5.11938	5.23951	3.79734	3.39486
C3orf58	ENSG00000181744.4	41	7.90822e-14	6.44067e-12	-2.22265	-4.67312	-1.50971	-1.88015	-2.43175	-2.00266
HIST1H4H	ENSG00000158406.2	41	2.40243e-13	1.72325e-11	6.22437	4.4099	3.68775	6.2922	5.91212	2.00657
PLK2	ENSG00000145632.10	42	5.37283e-13	3.48725e-11	2.22576	2.08276	5.09871	3.92481	5.78884	2.21983
MSL1	ENSG00000188895.7	42	1.25614e-12	7.26516e-11	-2.56735	3.37111	4.69613	-1.47287	3.1811	3.10863
SLC38A2	ENSG00000134294.9	44	1.45181e-13	1.10845e-11	3.65737	1.77693	3.80881	3.09611	4.42595	3.23208
DNAJB1	ENSG00000132002.3	44	6.79697e-13	4.303e-11	3.7046	2.00511	3.70231	1.65704	4.02612	4.8709
CNP	ENSG00000173786.12	45	1.56313e-12	8.82405e-11	2.38246	2.52024	4.81278	4.11079	2.78496	4.36396
TM4SF1	ENSG00000169908.6	46	2.3938e-13	1.72325e-11	-5.94039	-7.18346	-3.09195	-7.01039	-5.87145	-2.88269
TMED3	ENSG00000166557.8	47	8.78793e-11	3.24096e-09	-2.80987	-3.25501	-2.6511	-2.50708	-1.3234	-5.41253
DNAJC7	ENSG00000168259.10	48	2.44761e-14	2.09144e-12	2.96395	3.05605	3.28932	4.44057	4.22882	1.51921
RAD51C	ENSG00000108384.10	48	2.90336e-13	2.03581e-11	5.79855	6.23079	5.77922	5.46927	4.97868	1.76562
SLC7A8	ENSG00000092068.14	48	3.11797e-12	1.63062e-10	1.5287	3.83442	1.04677	3.7883	4.3293	2.00341
HIST2H2AA3	ENSG00000183558.5	50	2.28199e-12	1.23472e-10	3.59668	1.2935	4.17476	4.19937	3.36598	3.39039
NFIB	ENSG00000147862.10	51	1.50323e-12	8.51668e-11	-5.68618	-5.38154	1.07034	-3.41669	-3.68651	-4.77588
BRD2	ENSG00000204256.8	54	2.22037e-17	3.90112e-15	4.99928	1.71931	2.68752	1.68358	3.22683	2.8325
CD99	ENSG00000002586.13	54	8.15057e-13	4.95916e-11	-5.01258	-5.33719	-4.26454	-4.55643	-2.8601	-1.91146
HIST2H4B	ENSG00000182217.7	55	9.69899e-14	7.73791e-12	1.94732	1.97185	3.39847	4.81466	2.20713	2.28648
IFI30	ENSG00000216490.3	55	5.94542e-12	2.92354e-10	2.03638	2.86965	5.72097	2.58077	3.41356	1.65241
HIST1H2BH	ENSG00000197459.2	55	5.47897e-12	2.74598e-10	5.9753	6.42821	5.88174	5.36196	6.12143	4.93066
MXRA8	ENSG00000162576.12	56	1.58236e-10	5.51793e-09	2.19539	4.47044	4.64984	4.71419	3.61499	4.45931
SMS	ENSG00000102172.11	58	1.11221e-11	5.23619e-10	1.15616	2.3752	4.71482	2.68115	3.1767	1.90156
HIPK2	ENSG00000064393.11	59	4.09596e-10	1.2913e-08	-1.18771	-1.03959	-1.14323	-1.71488	-1.12542	-3.89031
SPDYC	ENSG00000204710.2	60	1.02744e-10	3.745e-09	4.93123	4.98975	5.13213	4.39337	5.13213	5.13213
HIST2H4A	ENSG00000183941.8	61	2.08059e-13	1.5419e-11	1.94514	1.94758	3.37936	4.78109	2.29465	2.34191
CDCP1	ENSG00000163814.3	66	7.40238e-15	7.18951e-13	-3.95918	-3.87006	-1.89108	-1.16691	-1.50272	-3.8089
DEGS1	ENSG00000143753.8	66	4.89417e-11	1.95729e-09	3.12266	-1.21291	5.02703	4.49433	2.88216	2.4552
LRRC37A2	ENSG00000238083.3	67	2.70993e-11	1.13912e-09	4.29928	2.3108	3.92554	3.22319	4.09062	3.4705
DHX8	ENSG00000067596.6	68	7.50788e-16	9.54478e-14	3.7407	3.70557	3.16819	3.5832	3.59962	2.81665
HIST1H1C	ENSG00000187837.2	68	4.27729e-13	2.87056e-11	5.99479	2.69853	4.17663	4.9392	5.13282	1.86925
KCNK1	ENSG00000135750.10	71	5.37461e-13	3.48725e-11	-1.87073	-3.0863	-1.13841	-3.7596	-2.41753	-1.25304
PTPRS	ENSG00000105426.10	72	1.28052e-15	1.54027e-13	-5.36525	-2.87408	-3.08213	-1.10105	-2.57676	-2.03398
HSPA8	ENSG00000109971.9	72	6.7532e-13	4.29268e-11	1.30177	1.50715	2.44339	3.25663	2.94892	1.13226
PRKDC	ENSG00000253729.3	73	7.7428e-11	2.9245e-09	1.29217	2.31412	4.11306	2.44625	1.58429	3.35736
AHSA1	ENSG00000100591.3	74	1.41256e-15	1.66076e-13	4.27171	2.69228	2.88308	2.50811	3.02881	2.6768
TOB1	ENSG00000141232.4	75	4.2076e-11	1.70451e-09	1.85656	1.46482	1.40563	3.34021	2.87757	3.34402
LY6K	ENSG00000160886.9	75	3.05258e-11	1.27289e-09	4.17312	6.13979	6.17714	6.17714	3.47267	4.62387
CROT	ENSG00000005469.7	76	5.3891e-09	1.32507e-07	4.4368	1.12283	3.31774	3.96679	4.1478	4.5653
UGCG	ENSG00000148154.5	77	1.23984e-10	4.43648e-09	1.35848	2.57955	3.4808	3.10691	5.45656	2.96312
ARL4D	ENSG00000175906.4	77	2.84498e-09	7.45175e-08	5.45587	4.8413	5.09868	5.50851	5.60807	5.7583
NOP56	ENSG00000101361.10	78	8.93155e-11	3.27847e-09	2.50269	1.18051	4.26723	1.38632	2.90301	1.16859
IL6ST	ENSG00000134352.15	79	1.27752e-14	1.18908e-12	6.63485	3.70615	1.05715	3.52522	4.51916	1.19194
PLA2G16	ENSG00000176485.6	79	1.77118e-11	7.95861e-10	1.11773	5.04325	4.818	5.03558	4.20409	-2.2575
DUSP5	ENSG00000138166.5	79	3.99786e-10	1.26292e-08	2.01192	2.14034	1.84721	2.10534	4.7488	4.43431
IDI1	ENSG00000067064.6	83	1.38635e-10	4.90462e-09	1.74776	1.07163	4.16076	2.67761	3.68611	3.10934
GLA	ENSG00000102393.5	84	9.11394e-11	3.33758e-09	5.68025	3.02886	5.46413	4.95943	5.58252	4.63064
HEBP2	ENSG00000051620.6	88	5.38258e-11	2.12544e-09	-3.92585	-4.05945	1.13418	-1.79356	-2.90021	-1.50602
TSPYL2	ENSG00000184205.10	88	5.13347e-09	1.27214e-07	4.53074	3.60421	4.62428	3.54986	5.04927	4.99811
EIF4A3	ENSG00000141543.5	92	6.13277e-15	6.18697e-13	4.74038	2.26235	3.45455	2.93124	2.90787	3.22732
IFITM2	ENSG00000185201.12	93	6.2338e-15	6.20879e-13	7.02176	3.9955	-2.15234	5.00113	2.40174	4.44789
ISOC1	ENSG00000066583.7	94	2.04458e-10	6.90521e-09	4.67139	4.25205	4.78505	4.62513	4.01335	2.64041
PSME2	ENSG00000100911.9	97	9.53068e-15	9.14302e-13	3.56831	2.8589	3.14769	2.48533	3.35098	1.37801
GSTM3	ENSG00000134202.6	97	8.52364e-11	3.1659e-09	6.88315	8.39936	4.48008	8.56241	6.36294	1.9253
CXCR4	ENSG00000121966.6	97	6.22203e-09	1.5061e-07	4.18694	2.02657	5.29148	4.88053	4.34639	5.02529
SYT1	ENSG00000067715.9	102	9.23371e-09	2.12023e-07	4.25458	4.31104	2.20387	3.64112	4.24738	4.24369
SPAG9	ENSG00000008294.16	107	2.04407e-14	1.75621e-12	5.07492	2.94808	3.71739	2.44033	2.84856	4.15817
HIST1H4J	ENSG00000197238.3	107	1.63708e-08	3.48761e-07	3.73884	3.49281	5.27334	2.61745	3.87135	5.06181
LARP4	ENSG00000161813.16	111	1.74486e-09	4.76168e-08	1.41579	1.66883	3.15534	2.50826	3.80075	1.97763
SLC16A4	ENSG00000168679.13	111	1.3477e-08	2.93101e-07	4.26817	3.80772	4.19132	4.0302	3.95251	4.2537
COA1	ENSG00000106603.13	112	1.79117e-09	4.87955e-08	2.46158	1.19534	2.68414	3.24426	4.2655	1.02979
EIF5	ENSG00000100664.6	116	8.89247e-14	7.1676e-12	4.04903	1.66128	2.29327	2.45671	2.98875	2.47959
SOD1	ENSG00000142168.10	116	4.18891e-11	1.70135e-09	1.43513	1.56119	1.34477	3.5073	2.37212	1.56344
CBR1	ENSG00000159228.8	116	4.62563e-10	1.43799e-08	1.89523	5.00499	3.95278	4.39336	3.26933	1.58341
RCN1	ENSG00000049449.4	118	5.06922e-11	2.02213e-09	-2.72351	-1.69211	-1.03858	-3.53934	-3.37348	-3.44725
PCBP2	ENSG00000197111.11	121	2.08146e-11	9.19431e-10	2.13058	1.78471	1.58722	2.19317	2.79847	3.61251
BPTF	ENSG00000171634.12	122	1.58204e-12	8.89871e-11	2.77399	2.27246	3.20346	1.22894	2.38953	2.46224
NQO1	ENSG00000181019.8	122	3.01704e-09	7.88921e-08	2.45141	2.36335	3.70751	3.17013	4.85902	1.21821
DDX60L	ENSG00000181381.9	123	3.27595e-09	8.46711e-08	4.78161	4.62709	4.15595	4.34205	5.11845	2.76582
CALM3	ENSG00000160014.12	124	1.69028e-09	4.63381e-08	2.46616	2.74112	4.05644	2.90229	2.96418	1.20278
ERH	ENSG00000100632.6	124	2.82112e-09	7.41408e-08	1.94447	1.67123	1.52269	2.34098	2.65263	1.60587
HERPUD1	ENSG00000051108.10	125	1.94061e-13	1.44501e-11	3.50843	1.78489	1.10592	1.43098	3.58634	2.03965
ZBTB10	ENSG00000205189.7	125	3.32037e-09	8.55365e-08	2.48176	2.28734	3.92767	2.08018	4.54853	1.92166
OSBPL1A	ENSG00000141447.12	128	9.36128e-10	2.72086e-08	-2.18859	-2.71363	-2.46146	-1.30338	-3.22406	-3.86573
CNOT4	ENSG00000080802.14	128	2.296e-09	6.14771e-08	2.21529	1.28939	3.45559	2.8189	2.82327	1.21166
ARL17A	ENSG00000185829.11	129	1.59113e-10	5.52899e-09	3.93167	2.84387	3.63638	3.88451	3.32356	2.66925
DNAJA4	ENSG00000140403.8	130	4.49712e-09	1.12335e-07	3.59161	1.73172	2.7443	4.22984	5.26535	3.96299
ATF2	ENSG00000115966.12	131	2.63896e-09	6.97051e-08	3.35918	1.93134	4.34423	3.79024	3.61956	3.69305
TMEM99	ENSG00000167920.4	131	3.6562e-09	9.32659e-08	3.51044	3.81917	3.75758	4.84652	4.94142	4.04318
SERTAD1	ENSG00000197019.4	134	6.53106e-10	1.9602e-08	4.42461	2.39565	4.30895	4.53982	3.91817	3.42165
MAOB	ENSG00000069535.12	134	4.6372e-08	8.5813e-07	4.20566	4.85961	4.58596	4.9535	3.90722	4.95869
WDR60	ENSG00000126870.11	136	7.6084e-13	4.68396e-11	-2.68187	-1.20729	-1.63799	-1.90213	-2.00844	-1.81781
CCDC47	ENSG00000108588.9	136	7.49171e-12	3.63813e-10	3.59191	2.28855	3.8345	2.0299	2.66542	1.3085
DNAJA1	ENSG00000086061.11	136	6.8011e-11	2.63893e-09	2.59883	1.10595	2.8708	2.80579	3.44741	2.22768
INPP4B	ENSG00000109452.8	136	6.23356e-09	1.5064e-07	4.75607	4.27332	4.37272	3.64473	5.00095	4.1071
EZH2	ENSG00000106462.6	137	4.06984e-09	1.02811e-07	3.12907	2.00834	3.97811	2.16819	3.20216	3.18959
CD55	ENSG00000196352.9	139	4.4831e-09	1.12335e-07	1.28497	1.24911	3.95355	2.62607	3.31374	2.49221
SYTL2	ENSG00000137501.12	141	3.48775e-09	8.95534e-08	3.52213	3.80376	2.93535	4.70673	4.54391	-2.02396
OFD1	ENSG00000046651.10	144	1.23053e-10	4.41324e-09	2.8921	1.83856	3.75836	3.30359	2.39527	3.73963
ISYNA1	ENSG00000105655.14	145	1.69208e-09	4.63381e-08	1.4007	4.11039	3.75967	4.21536	3.52815	3.90673
PRKAG2	ENSG00000106617.9	148	4.15816e-10	1.30827e-08	-2.19698	-2.52505	-1.17399	-1.40783	-1.3568	-3.71182
MRPS6	ENSG00000243927.1	149	7.4703e-09	1.76974e-07	2.09222	3.53992	4.73754	1.83273	4.2511	3.06549
TUFT1	ENSG00000143367.11	150	1.6533e-12	9.16762e-11	5.32802	1.70219	3.0248	3.11821	4.26009	1.9198
RPA3	ENSG00000106399.7	150	3.24733e-10	1.03629e-08	2.16717	1.18648	2.38997	4.08805	2.2967	1.59926
ATRNL1	ENSG00000107518.12	150	5.67544e-08	1.02716e-06	3.78456	3.92242	3.68183	3.93925	3.78355	3.93925
ARFGEF1	ENSG00000066777.4	155	8.52693e-09	1.98121e-07	2.83132	2.68197	3.73933	1.63001	2.04576	1.67725
CDK7	ENSG00000134058.6	156	7.63831e-09	1.7988e-07	4.60672	3.10474	3.21091	3.03611	4.64923	1.10768
LAGE3	ENSG00000196976.5	158	8.98143e-09	2.06963e-07	1.47854	3.25815	4.31488	3.94038	3.18022	3.97801
LYPD3	ENSG00000124466.8	159	2.23607e-07	3.42128e-06	3.67603	1.16713	3.61884	2.52431	1.68901	4.24307
UPK3BL	ENSG00000267368.1	160	2.94038e-08	5.70456e-07	-3.25238	-2.67198	-2.0965	-1.33769	-3.14539	-3.20751
RBM22	ENSG00000086589.7	164	5.13271e-12	2.60585e-10	3.99078	2.88276	3.77137	3.57414	2.7245	3.06531
ARHGAP29	ENSG00000137962.8	167	2.20684e-08	4.48161e-07	1.75056	2.57284	3.18796	1.02316	3.98478	2.69785
SLC19A2	ENSG00000117479.8	168	1.04465e-08	2.33361e-07	4.87776	1.58984	2.55194	3.82768	4.69548	3.38277
SRP54	ENSG00000100883.7	169	7.73985e-12	3.747e-10	3.32865	2.2178	3.11766	2.57098	2.94246	1.68216
CRIP2	ENSG00000182809.6	171	1.35523e-08	2.93921e-07	1.45268	1.05382	3.64886	1.90512	3.39572	5.02966
FAR1	ENSG00000197601.8	172	1.33936e-08	2.91694e-07	2.37738	4.37253	2.89261	2.66481	3.61486	2.08796
HIST1H2BN	ENSG00000233822.3	172	6.48883e-09	1.55862e-07	5.04306	4.87165	5.16736	4.92228	4.74736	3.55606
FAM114A1	ENSG00000197712.7	173	9.82409e-12	4.66229e-10	-3.94466	-2.28333	-2.30307	-3.78843	-2.99584	-3.72369
ACOT13	ENSG00000112304.6	173	1.38051e-08	2.98164e-07	3.12496	1.91229	3.66647	1.98227	2.71232	2.63955
RNF43	ENSG00000108375.8	173	2.7581e-08	5.39781e-07	3.31563	2.95933	3.82618	3.28939	4.45817	2.19983
SPANXD	ENSG00000196406.4	173	9.87158e-08	1.7019e-06	5.52125	5.42543	5.52125	5.52125	5.52125	5.52125
MAP1LC3B	ENSG00000140941.8	174	9.86901e-12	4.66229e-10	3.39824	1.88318	3.3335	2.30107	3.33278	1.20363
TES	ENSG00000135269.13	175	1.78612e-08	3.7439e-07	-3.56571	-4.70761	-1.20505	-4.33619	-3.75796	-4.01156
UBE2H	ENSG00000186591.7	176	1.11508e-11	5.23619e-10	3.632	1.99403	3.12916	1.57149	3.20961	2.0768
HIST1H2AM	ENSG00000233224.1	177	2.60183e-08	5.16304e-07	4.54746	2.99048	3.97405	4.03858	4.60641	3.94752
ACAA2	ENSG00000167315.13	180	6.15083e-07	8.32732e-06	2.45018	3.06509	2.04858	1.52668	2.11109	4.01728
GNS	ENSG00000135677.6	181	2.05494e-08	4.25041e-07	2.78836	3.66253	3.57894	3.25538	2.83079	1.52939
AFF3	ENSG00000144218.14	184	1.80682e-08	3.77213e-07	-1.34911	3.29298	1.30599	3.42127	3.34746	-1.97543
NXF1	ENSG00000162231.9	186	1.25082e-08	2.73938e-07	4.68803	1.32909	5.23043	3.81848	4.61665	3.67213
FCGRT	ENSG00000104870.8	186	1.46534e-08	3.15178e-07	1.19786	4.65041	3.35596	4.61173	3.08415	2.25841
PHEX	ENSG00000102174.7	186	3.4821e-07	5.06979e-06	4.2596	4.36129	4.32729	4.41988	4.68475	4.59752
WSB1	ENSG00000109046.10	188	1.04019e-09	2.99548e-08	2.58788	2.09635	1.2081	3.19914	2.97176	3.57032
RBM28	ENSG00000106344.4	188	2.18145e-08	4.44736e-07	2.55769	2.96246	3.8139	3.35646	3.11308	1.54699
TXNL4B	ENSG00000140830.4	189	1.94012e-08	4.03427e-07	4.46713	3.90537	4.55147	3.74946	3.78806	2.80923
HIST1H2AE	ENSG00000168274.3	190	5.42444e-10	1.66318e-08	5.50608	3.49296	4.36368	5.06306	4.11664	3.84971
EGLN3	ENSG00000129521.9	190	5.66014e-09	1.38077e-07	4.7381	2.38939	4.28515	3.96417	4.31192	3.37908
NUP153	ENSG00000124789.7	194	2.84931e-10	9.28223e-09	4.05853	1.53534	2.68208	1.56168	3.32427	2.85387
HYPK	ENSG00000242028.1	196	5.55059e-08	1.00595e-06	3.01094	1.81114	3.81025	2.83676	4.32714	3.61366
RALBP1	ENSG00000017797.7	205	3.24103e-08	6.22604e-07	2.52698	1.99424	3.1703	1.3597	2.10899	1.06026
SERPINB6	ENSG00000124570.13	205	4.49294e-08	8.33406e-07	1.43951	4.26606	2.31225	1.51127	3.21033	-1.85321
RARRES3	ENSG00000133321.6	207	7.62973e-08	1.34354e-06	5.16901	3.51392	1.9494	5.79685	6.12217	5.72946
POF1B	ENSG00000124429.13	209	5.37243e-07	7.40818e-06	2.81683	3.07047	3.36914	2.68101	3.5254	3.5254
CUL3	ENSG00000036257.8	210	3.86511e-08	7.31704e-07	2.11934	2.45247	3.81743	1.01404	2.77862	3.44906
ZNF10	ENSG00000256223.1	211	2.79794e-07	4.17874e-06	3.5278	3.5379	4.25117	3.33994	3.99506	4.138
VMP1	ENSG00000062716.6	212	7.13787e-11	2.74238e-09	4.07246	1.35255	1.33764	2.19215	2.1966	1.78334
NCAM2	ENSG00000154654.10	212	4.64797e-07	6.536e-06	3.04365	4.1399	4.09946	4.36292	4.36292	4.36292
NFAT5	ENSG00000102908.16	214	8.06421e-11	3.02257e-09	3.59277	2	2.4421	1.4735	2.53026	2.20328
SPANXA1	ENSG00000198021.5	214	3.03434e-07	4.48045e-06	4.05919	3.98829	4.05919	4.05919	4.05919	4.05919
MXD1	ENSG00000059728.6	215	1.35986e-07	2.23792e-06	3.19014	2.90141	2.23763	2.00829	4.24279	2.97272
SPANXA2	ENSG00000203926.4	215	3.03434e-07	4.48045e-06	4.05919	3.98829	4.05919	4.05919	4.05919	4.05919
ATP5G1	ENSG00000159199.9	217	1.05514e-10	3.81926e-09	2.69511	1.99616	2.23487	2.75963	2.25139	1.74101
HSPA2	ENSG00000126803.8	221	6.08291e-07	8.25681e-06	3.32568	2.75169	3.53228	3.6252	3.51371	3.62758
MEST	ENSG00000106484.10	225	5.83627e-08	1.04899e-06	2.33982	3.41823	4.12601	1.72221	2.64038	3.45085
IGFBP4	ENSG00000141753.5	225	5.30681e-08	9.68292e-07	4.01899	3.58753	2.11532	3.80205	3.76242	1.40367
EXOC2	ENSG00000112685.9	226	1.06208e-07	1.8111e-06	3.95402	2.12514	3.90063	1.96355	4.02891	1.64557
SPARC	ENSG00000113140.6	227	9.22481e-07	1.17946e-05	4.43029	4.02274	2.2826	4.24556	4.12842	4.35426
PNP	ENSG00000198805.7	228	1.32609e-09	3.72951e-08	5.18386	1.40348	4.60574	4.85934	4.25445	2.50484
NGDN	ENSG00000129460.11	233	2.63718e-10	8.6816e-09	3.82089	1.43819	3.66249	1.41681	3.49932	1.059
SERPINA3	ENSG00000196136.12	234	2.81718e-07	4.20347e-06	5.30731	4.91449	-2.94049	5.24888	2.02696	4.87935
HNRNPAB	ENSG00000197451.6	235	4.25518e-08	7.94962e-07	2.50211	1.21091	3.07096	1.09272	2.66782	2.04101
H2AFX	ENSG00000188486.3	235	1.85341e-07	2.9186e-06	2.58171	2.38732	2.91816	2.64759	3.13357	2.80157
CYP4B1	ENSG00000142973.8	235	1.15492e-06	1.43671e-05	4.16059	3.88599	1.45732	3.88219	4.14852	4.25712
KRT8	ENSG00000170421.7	237	6.44824e-08	1.15243e-06	1.99741	1.24082	1.7895	1.78641	2.49831	2.12245
SETX	ENSG00000107290.9	237	1.99921e-07	3.1116e-06	2.15319	1.63698	2.76636	2.01105	3.02249	2.02626
SCYL2	ENSG00000136021.13	238	1.99985e-07	3.1116e-06	1.70866	2.15167	2.0679	1.43436	3.27624	2.11398
IER5	ENSG00000162783.8	241	4.56938e-09	1.137e-07	4.47457	1.97061	2.72666	1.61527	2.75775	3.93304
TERF1	ENSG00000147601.9	242	4.92651e-08	9.08441e-07	4.38171	1.75694	4.52492	2.4441	3.63991	1.54055
COASY	ENSG00000068120.10	243	9.89364e-08	1.70195e-06	3.04145	3.06899	3.83656	3.49317	3.05362	2.45291
KLHL15	ENSG00000174010.9	243	1.33878e-06	1.63042e-05	3.33778	2.73582	3.11295	2.81235	3.0555	3.31056
TMPO	ENSG00000120802.9	247	1.11208e-07	1.87793e-06	2.16568	1.98509	4.02474	1.65441	2.60464	2.11347
RAB30	ENSG00000137502.5	247	2.07419e-07	3.21448e-06	4.51361	1.23736	3.26059	4.34251	4.62134	3.59968
PCM1	ENSG00000078674.13	249	1.1456e-07	1.93037e-06	1.77368	1.23699	3.37488	2.21354	3.16552	3.16947
VSTM2A	ENSG00000170419.6	250	6.05386e-07	8.22452e-06	4.37872	4.10082	4.37872	4.37872	4.37872	4.37872
NDUFAF6	ENSG00000156170.8	254	1.28592e-07	2.13914e-06	2.22902	2.72486	3.78427	1.83433	3.41318	1.31762
RBMX	ENSG00000147274.10	256	9.97252e-09	2.24052e-07	2.21271	1.63084	2.81217	2.75919	2.10349	2.25491
AGR3	ENSG00000173467.4	258	9.70666e-08	1.67716e-06	5.83619	3.98416	-2.47639	5.33682	5.37631	4.74792
RABGAP1L	ENSG00000152061.17	258	1.31929e-07	2.18766e-06	2.95747	1.38886	3.91215	1.08049	2.29765	3.38885
RPAP3	ENSG00000005175.5	260	3.36105e-07	4.91644e-06	1.13809	1.43752	2.41894	1.06632	2.68804	2.30348
SMARCE1	ENSG00000073584.14	263	1.89895e-07	2.98475e-06	3.10705	2.45366	3.88297	3.32293	3.25397	3.22343
KRT10	ENSG00000186395.6	264	3.39218e-08	6.50043e-07	2.35037	1.66911	1.87583	2.61297	1.80876	1.58779
TRUB1	ENSG00000165832.4	266	1.59917e-07	2.58596e-06	2.45405	3.05953	3.93961	3.23389	3.62838	1.98124
CBX1	ENSG00000108468.10	268	1.63408e-07	2.63152e-06	2.21296	2.20505	3.36656	3.27286	1.27113	1.57327
LDOC1	ENSG00000182195.6	271	2.89673e-07	4.30572e-06	4.40361	2.36273	4.65051	2.60667	3.28984	4.29353
NOL11	ENSG00000130935.5	272	1.69491e-07	2.70443e-06	3.09914	2.68997	3.73039	1.52949	3.14796	2.37156
HOXC9	ENSG00000180806.4	277	7.59812e-07	1.00263e-05	3.24432	3.38257	2.96356	2.59921	2.83401	2.78585
RIOK3	ENSG00000101782.10	278	2.12217e-09	5.70179e-08	4.58698	1.12898	2.58953	1.80352	1.99512	1.48454
GSTP1	ENSG00000084207.11	279	8.31226e-07	1.08225e-05	2.24248	-5.60855	3.7343	-1.31262	-2.64292	3.12565
ERMP1	ENSG00000099219.9	280	5.56687e-07	7.62252e-06	1.38811	1.24011	2.56771	1.41843	3.00795	1.15452
SPTBN1	ENSG00000115306.11	283	5.7668e-08	1.04128e-06	-3.09141	-1.90268	-1.54321	-3.92503	-3.03429	-3.04013
STAG2	ENSG00000101972.14	287	2.21388e-07	3.39397e-06	1.51531	1.66801	3.2596	1.40316	2.29424	1.61346
SPTSSA	ENSG00000165389.6	290	6.89261e-07	9.18867e-06	1.09632	2.27498	2.49887	2.38734	3.22811	1.5868
WIPF2	ENSG00000171475.9	296	1.80934e-06	2.11771e-05	-2.02015	2.5005	2.4429	-1.33817	1.93836	2.09979
HIST1H3H	ENSG00000203813.4	297	2.72296e-07	4.08627e-06	3.97695	3.53676	4.33398	4.39959	4.34428	2.94309
ARL6IP1	ENSG00000170540.10	301	2.62904e-08	5.20383e-07	1.574	1.31113	1.75494	1.27527	1.81682	3.13958
USP38	ENSG00000170185.5	302	4.35677e-07	6.19334e-06	2.99655	2.9474	3.36789	2.70017	3.31707	2.43218
CNIH4	ENSG00000143771.7	307	2.77062e-07	4.14586e-06	1.70372	1.07201	3.43502	2.21757	1.53272	1.0992
LRBA	ENSG00000198589.6	307	1.96996e-06	2.28349e-05	2.18832	3.04668	3.03532	2.64265	3.00447	1.71707
TFPI	ENSG00000003436.10	307	2.74436e-06	3.06306e-05	3.14489	4.51091	4.90209	1.26586	4.6157	4.65653
RRM2B	ENSG00000048392.7	312	3.01443e-07	4.4637e-06	2.85443	2.31198	3.26482	2.31261	2.00021	-1.13856
PTPLAD1	ENSG00000074696.8	312	9.96311e-07	1.26046e-05	-1.38321	1.73223	1.40595	2.97306	3.47184	2.65602
DDX5	ENSG00000108654.7	315	8.69563e-09	2.01144e-07	2.70957	1.41795	2.07966	1.68174	2.10816	1.92583
NEDD4L	ENSG00000049759.12	323	1.16262e-06	1.44171e-05	3.63448	4.17453	2.53239	2.0578	4.44379	1.11752
NPTN	ENSG00000156642.12	324	1.04284e-08	2.33348e-07	2.92331	1.13711	2.95781	1.93428	2.90631	1.69155
DISP1	ENSG00000154309.7	326	5.2523e-06	5.34707e-05	3.24225	2.60849	3.27834	3.21744	3.39374	3.42435
ID2	ENSG00000115738.5	327	1.61275e-07	2.60254e-06	1.16524	1.14089	2.93831	4.10992	3.11115	2.48339
POLG2	ENSG00000256525.2	328	1.02907e-06	1.29875e-05	3.95999	3.33161	1.97372	4.1146	4.18754	3.73064
MKNK2	ENSG00000099875.10	330	4.24321e-07	6.0374e-06	-2.03073	-2.26306	-2.81386	-1.42237	-1.07697	-1.00622
GOLM1	ENSG00000135052.12	330	5.04553e-07	7.02555e-06	-2.05133	-2.7352	-1.58391	-3.82988	-1.5625	-3.52109
AKR7A3	ENSG00000162482.4	335	6.91489e-07	9.21024e-06	2.27396	2.45954	2.68353	2.17749	2.68353	-2.00664
EHF	ENSG00000135373.8	337	3.85811e-06	4.11243e-05	-3.98585	-4.49189	3.19819	-2.94504	-1.50681	-3.21865
CDK5RAP3	ENSG00000108465.10	346	2.11961e-08	4.37259e-07	4.08076	2.24835	2.76499	3.81032	2.08995	1.71544
SOWAHC	ENSG00000198142.3	348	1.29437e-06	1.57879e-05	2.25069	2.94468	3.69726	3.36185	3.77495	1.73117
FAM3B	ENSG00000183844.12	348	1.50215e-06	1.80407e-05	-1.67759	3.62222	3.63635	3.4945	3.76127	3.45673
RCOR1	ENSG00000089902.8	349	1.82271e-06	2.13177e-05	2.37297	1.3329	2.41858	1.96199	2.75074	2.28075
PDZD11	ENSG00000120509.6	349	2.71111e-06	3.02812e-05	2.25406	3.59931	3.83388	3.58201	3.88998	2.84518
RWDD2B	ENSG00000156253.2	350	4.46288e-07	6.3212e-06	2.7025	2.07714	3.98848	3.89709	2.36491	-1.11303
MAN2A1	ENSG00000112893.5	350	8.73064e-07	1.13108e-05	3.1907	2.91562	2.29023	2.48571	2.67002	1.23212
ALDH7A1	ENSG00000164904.11	352	2.22441e-08	4.51143e-07	4.21421	1.96124	3.64851	3.22021	3.51985	2.68454
NKIRAS2	ENSG00000168256.13	352	2.74177e-07	4.11055e-06	3.17683	2.55658	3.20781	2.76015	2.10341	1.65984
ZNF165	ENSG00000197279.3	353	5.63858e-07	7.70047e-06	6.11166	2.18687	2.59146	4.51917	5.77434	2.97787
CCDC41	ENSG00000173588.10	355	7.13278e-07	9.47623e-06	2.95131	2.35532	3.2477	3.80521	3.63326	1.97769
HIST2H2BE	ENSG00000184678.8	356	4.55886e-07	6.43383e-06	4.19419	2.67071	4.22979	3.28019	3.0515	2.60022
CPA6	ENSG00000165078.7	356	3.52883e-06	3.81871e-05	3.74326	3.58108	3.71902	3.70649	3.68559	3.70305
MAP3K8	ENSG00000107968.5	360	2.01477e-07	3.12913e-06	5.00192	2.51788	3.75583	2.05737	4.56025	3.79393
RAB5C	ENSG00000108774.10	361	3.49509e-07	5.07926e-06	2.61533	1.79375	1.95585	3.00376	2.32467	1.96503
GINS2	ENSG00000131153.4	361	3.93551e-06	4.18637e-05	3.10595	3.29304	2.80447	1.59179	3.27703	2.94073
SC5D	ENSG00000109929.5	364	2.2809e-06	2.59581e-05	2.73821	4.00244	4.13549	4.45979	4.66514	2.01492
HIST1H3D	ENSG00000197409.6	366	1.11274e-06	1.38977e-05	3.30774	3.10907	2.61713	4.1964	4.01755	1.61579
PSMD11	ENSG00000108671.5	367	3.90922e-07	5.60812e-06	1.36108	1.54053	1.88237	2.40274	2.30732	1.14802
ANKRD42	ENSG00000137494.9	367	9.59094e-06	9.11693e-05	2.50868	1.48106	2.59706	2.99158	2.51135	2.94887
TUBB2A	ENSG00000137267.5	369	7.98815e-08	1.40192e-06	4.16036	1.2289	3.16511	1.83311	3.55433	1.74174
GMFB	ENSG00000197045.8	370	1.24071e-06	1.52283e-05	2.51652	2.21688	3.73	2.08806	3.69238	1.62589
TNFAIP8	ENSG00000145779.7	373	8.19472e-07	1.06959e-05	4.06271	1.55551	3.50335	2.47209	3.29461	3.66879
ZFAND2A	ENSG00000178381.7	378	3.84383e-08	7.28557e-07	5.88681	3.6298	4.12787	3.93155	4.73064	3.33997
CKS2	ENSG00000123975.4	387	3.46392e-06	3.75366e-05	3.06713	2.89698	3.97178	3.13	4.55787	3.1993
CASC3	ENSG00000108349.10	390	1.16423e-06	1.44174e-05	-3.32868	2.69045	3.6287	-1.4333	2.27319	1.03031
CNOT1	ENSG00000125107.12	391	4.45442e-08	8.28226e-07	3.71732	1.52548	2.65069	1.63688	2.72243	1.88305
HAUS1	ENSG00000152240.8	392	3.62581e-06	3.90205e-05	3.71707	2.34666	3.49696	3.17319	4.02936	1.09039
ATF3	ENSG00000162772.12	396	5.103e-08	9.33283e-07	3.87779	-1.42863	2.64314	1.70175	1.48231	1.43844
HSPA6	ENSG00000173110.6	398	1.39516e-05	0.000126185	4.65097	2.55484	4.33737	1.82172	4.20197	4.59111
GSTM4	ENSG00000168765.11	403	7.84049e-07	1.03027e-05	3.97597	3.32043	2.74428	4.25775	3.37327	3.31811
PTPRF	ENSG00000142949.12	407	4.81712e-06	4.99174e-05	-2.78208	-2.67974	-1.63566	-1.55193	-2.47249	-1.22657
H2AFJ	ENSG00000246705.3	413	9.26958e-07	1.18422e-05	1.53939	2.05046	1.5553	3.12811	1.77845	1.56757
GBP2	ENSG00000162645.8	413	3.39182e-05	0.000265988	3.15006	1.67826	1.82104	1.14024	2.3066	3.59283
ANKRD10	ENSG00000088448.10	423	8.272e-08	1.44524e-06	-4.31694	-1.92929	-2.91732	-2.40763	-1.75872	-2.80648
TNPO3	ENSG00000064419.9	426	1.97724e-06	2.29023e-05	2.04215	1.28925	3.03504	2.56348	1.99162	1.71923
WDR44	ENSG00000131725.9	427	3.95331e-06	4.19958e-05	2.9294	2.21099	2.99564	2.42002	2.85651	3.14209
DLX3	ENSG00000064195.7	428	1.57095e-05	0.000139099	3.00771	3.11813	2.83999	2.74452	2.96783	3.07277
ZNF331	ENSG00000130844.12	431	5.30539e-06	5.39755e-05	3.76053	1.71166	3.58617	2.53878	3.90254	2.8976
LUC7L3	ENSG00000108848.11	432	1.05571e-07	1.80614e-06	2.24773	1.62263	2.15013	1.34836	1.53376	1.11878
SIRT1	ENSG00000096717.7	438	8.9e-06	8.50149e-05	3.09527	1.79865	3.27782	2.17729	3.58571	3.58737
TLK2	ENSG00000146872.13	442	1.58389e-07	2.5639e-06	3.82731	2.81017	2.91013	1.61673	2.47208	2.53522
RAP1A	ENSG00000116473.10	444	2.65648e-06	2.9756e-05	2.17559	1.72272	3.84916	2.49879	1.72484	1.24625
PAICS	ENSG00000128050.4	445	2.66371e-06	2.98157e-05	-1.12705	1.38905	3.27258	1.61717	1.74221	-1.77557
C18orf21	ENSG00000141428.12	446	2.67841e-06	2.99588e-05	3.27707	1.47858	3.50474	2.78105	2.20852	1.18943
SLC5A3	ENSG00000272962.1	447	4.20552e-06	4.43438e-05	3.02615	2.83273	3.2303	1.9695	3.14537	2.85104
TNIK	ENSG00000154310.12	451	2.43634e-05	0.00019971	2.51984	1.50394	3.34307	3.12136	3.08671	3.26796
GLTP	ENSG00000139433.5	452	2.90404e-06	3.21149e-05	-1.27212	1.38468	3.23566	1.81909	1.92253	2.30599
TPMT	ENSG00000137364.4	455	3.00311e-06	3.30199e-05	2.62666	1.47352	2.9384	2.16259	1.94745	1.12936
PPP1R3C	ENSG00000119938.8	457	1.39488e-05	0.000126185	2.57251	3.58628	3.72449	3.48649	3.72449	3.61365
LXN	ENSG00000079257.3	458	1.56168e-05	0.00013864	3.69822	3.67313	3.2184	3.3761	2.75658	-3.52631
MYBL1	ENSG00000185697.12	466	4.80366e-06	4.98109e-05	3.29953	3.02998	3.16926	3.39052	2.98975	2.89855
TTLL5	ENSG00000119685.15	468	5.10652e-06	5.22925e-05	2.65288	1.25978	2.97478	3.58001	3.47748	1.89882
CXorf40B	ENSG00000197021.4	469	5.2115e-06	5.31933e-05	2.03731	3.33945	3.71183	2.13881	3.65988	2.09348
CDK16	ENSG00000102225.11	473	4.77463e-07	6.69248e-06	3.21249	1.85197	3.08551	1.28822	2.27	2.50473
CEP290	ENSG00000198707.10	473	1.10397e-05	0.000103	1.81862	1.55864	2.00232	2.18837	2.80137	1.1372
SRGAP2	ENSG00000163486.8	474	1.63974e-06	1.94062e-05	2.41007	1.03023	1.80302	2.64406	1.45704	1.15153
CCNE2	ENSG00000175305.12	476	5.90175e-06	5.93477e-05	2.70082	2.24647	3.64009	2.85039	3.64546	3.13697
ANKLE2	ENSG00000176915.10	477	4.16043e-06	4.39572e-05	2.10936	1.12346	2.88857	1.69961	2.06248	2.02009
ZNF800	ENSG00000048405.5	482	5.81357e-06	5.86117e-05	2.68396	1.63235	2.46429	2.34242	2.77013	1.19004
RND1	ENSG00000172602.5	491	1.53678e-05	0.000136693	1.85385	1.3433	2.67254	2.65362	3.18946	2.96162
GSTA3	ENSG00000174156.9	498	2.44465e-05	0.000200141	2.53872	3.25467	3.38754	2.3193	3.38754	3.38754
PTTG1	ENSG00000164611.8	499	9.99637e-06	9.45363e-05	3.81316	2.51624	4.18677	2.17609	2.86047	3.98412
ZCCHC8	ENSG00000033030.9	501	1.46402e-05	0.000131569	3.29147	2.03442	2.76037	3.19505	3.55601	2.45107
KIF22	ENSG00000079616.8	506	6.51538e-06	6.46863e-05	1.59518	1.41631	3.41269	2.13749	2.69914	1.85101
MGMT	ENSG00000170430.9	507	3.38859e-06	3.67968e-05	1.36101	1.71993	1.71989	2.56619	2.04214	1.77542
ZNF622	ENSG00000173545.4	507	1.58901e-05	0.000140301	3.51051	1.07417	2.66373	2.41069	3.71697	1.57673
HNMT	ENSG00000150540.9	510	3.57891e-06	3.85955e-05	1.75372	2.2762	2.61685	3.35637	3.0632	3.01466
ABRACL	ENSG00000146386.7	511	6.8576e-06	6.77247e-05	-3.65772	-2.25364	4.04727	-1.91297	1.30173	1.22058
ATF5	ENSG00000169136.4	512	6.9835e-06	6.87664e-05	1.95956	1.02826	2.13876	1.20704	1.69137	1.17559
LTN1	ENSG00000198862.9	513	7.01067e-06	6.89904e-05	1.60133	1.05143	3.52737	2.8331	2.71361	1.4719
SPANXB2	ENSG00000227234.1	515	1.53347e-05	0.000136554	4.63007	4.63007	4.63007	4.63007	4.63007	4.63007
SPANXB1	ENSG00000235604.1	516	1.53347e-05	0.000136554	4.63007	4.63007	4.63007	4.63007	4.63007	4.63007
PEX2	ENSG00000164751.10	518	1.09771e-05	0.000102538	2.24442	1.91305	3.45618	1.6647	2.29558	3.733
KLHDC10	ENSG00000128607.9	526	7.74453e-06	7.54995e-05	1.69508	2.21332	3.05766	1.91627	2.0894	1.63137
SNTB2	ENSG00000168807.12	529	1.26216e-05	0.000115824	1.78489	1.99483	2.50059	1.52941	2.51021	1.02603
IRX3	ENSG00000177508.11	532	7.27755e-07	9.64399e-06	2.82633	1.01664	1.4999	1.5122	1.50962	1.71427
ZFYVE16	ENSG00000039319.12	533	5.22292e-06	5.32751e-05	1.84684	2.24535	1.86586	2.8406	1.96098	1.12256
C16orf80	ENSG00000070761.3	533	8.59432e-06	8.2803e-05	2.80209	1.49076	3.82918	2.16572	2.13697	1.94745
TRERF1	ENSG00000124496.8	536	2.25098e-05	0.000186829	2.1366	1.85535	2.08341	1.06127	2.51046	1.48337
ZNF844	ENSG00000223547.5	536	3.40246e-05	0.000266421	2.95076	2.79601	2.3273	2.05673	2.59663	2.36095
TOP2A	ENSG00000131747.10	537	7.90244e-07	1.03754e-05	-4.99347	3.0266	3.15402	3.06936	3.20299	3.28766
TAF9B	ENSG00000187325.4	537	8.7732e-06	8.40603e-05	1.9401	1.08858	3.18488	2.66857	2.45049	1.66326
HEXIM1	ENSG00000186834.2	538	2.16984e-05	0.000181637	2.35022	1.56424	1.68194	2.52208	2.61041	1.73056
CLK4	ENSG00000113240.8	540	1.3114e-05	0.000119991	3.28687	1.70303	2.4647	2.14887	3.45824	3.37981
ARL1	ENSG00000120805.9	543	2.40233e-05	0.0001974	1.1194	1.41178	2.64431	1.707	3.1447	1.14494
ARHGAP5	ENSG00000100852.8	557	1.09531e-05	0.000102375	-1.86467	-2.72223	-1.12774	-3.05444	-2.90778	-3.04774
HELLS	ENSG00000119969.10	558	2.75623e-05	0.000222047	2.6002	1.74533	3.22984	3.22285	3.96321	3.37356
CLEC2D	ENSG00000069493.10	561	0.000149818	0.000935958	2.5667	2.13902	2.84956	2.83472	3.47133	3.90898
ABHD3	ENSG00000158201.5	564	1.25344e-05	0.000115226	2.49168	1.44201	3.54814	2.64947	2.57468	1.93172
PPWD1	ENSG00000113593.7	565	1.90435e-05	0.000162738	2.00981	2.94114	3.1781	3.13102	2.44795	1.60842
RPS6KB1	ENSG00000108443.9	566	1.19816e-06	1.47991e-05	3.54951	1.25528	2.62625	1.76312	1.91697	1.24104
QPRT	ENSG00000103485.13	566	3.04982e-05	0.000242081	-1.28812	2.32833	1.93965	1.17625	2.50665	2.29267
SPECC1L	ENSG00000100014.15	567	1.52747e-05	0.000136174	3.00662	2.90738	3.30248	2.40499	3.20375	2.71992
FAM21A	ENSG00000099290.11	584	1.47266e-06	1.77275e-05	2.95368	1.2374	2.19293	1.44421	1.96165	1.28225
PVALB	ENSG00000100362.8	585	5.63077e-05	0.000405653	3.57531	3.74049	-1.65914	3.82247	3.63303	1.48156
MPO	ENSG00000005381.6	589	4.03012e-05	0.000306512	2.42222	2.25734	2.42222	2.41035	2.42222	2.42222
VPS25	ENSG00000131475.2	590	1.11361e-05	0.000103652	2.96229	2.17851	3.07429	3.66395	2.49962	1.66825
ATHL1	ENSG00000142102.11	590	1.62985e-05	0.000143099	2.41812	1.58715	1.00487	2.31111	1.54325	2.14647
RASA1	ENSG00000145715.10	591	2.04914e-05	0.000173296	2.93396	2.79167	3.36747	3.6105	3.56179	3.03817
NBR1	ENSG00000188554.9	596	1.05626e-05	9.91997e-05	2.77924	2.34755	2.60214	2.93515	1.9298	1.16956
POP5	ENSG00000167272.6	602	1.71508e-05	0.000149158	2.2613	1.80555	3.62101	3.24263	2.99385	2.13528
ATF1	ENSG00000123268.4	604	1.75996e-05	0.000152637	2.15981	1.70459	3.22232	1.09286	1.95631	2.24473
NPIPB11	ENSG00000254206.1	608	0.000107228	0.0007051	1.51605	1.31201	1.36491	1.54439	1.34709	1.56779
MTHFD1	ENSG00000100714.11	613	1.36682e-05	0.000124261	3.23694	1.97869	2.73586	3.59618	2.64871	1.54792
ZC3HAV1	ENSG00000105939.8	621	9.9117e-06	9.3876e-05	1.08235	1.38497	2.69196	2.73595	1.71238	1.30321
ARMCX1	ENSG00000126947.7	623	4.22154e-05	0.000318592	2.9278	2.76648	2.89649	2.58718	2.30162	2.61494
ANLN	ENSG00000011426.6	625	2.29668e-05	0.000189917	2.33479	2.99783	3.73964	2.51013	2.98682	3.3088
GALM	ENSG00000143891.12	625	5.81225e-05	0.000416336	2.27864	1.86177	2.56313	2.19406	2.82893	1.79984
SMC2	ENSG00000136824.14	628	2.06457e-05	0.000174506	1.39257	1.34434	3.08743	1.84328	2.42427	2.7167
PRPF39	ENSG00000185246.13	630	1.65558e-05	0.000144951	1.70546	1.45905	1.15015	2.89108	1.99363	1.03393
DEDD2	ENSG00000160570.9	636	1.70121e-05	0.000148199	3.32958	1.02188	3.44391	1.54473	2.10646	2.44412
HMGN5	ENSG00000198157.6	637	2.1444e-05	0.000179917	1.665	1.86335	3.20944	1.68575	2.82697	2.51924
MICB	ENSG00000204516.5	637	0.00014494	0.000910941	2.85219	2.54809	2.41149	2.2032	2.49232	2.86036
AREG	ENSG00000109321.6	641	0.000247056	0.00142292	3.48212	2.26572	3.09852	-1.72844	2.60999	3.63767
CCNB1	ENSG00000134057.10	642	6.59476e-05	0.000462432	2.24975	3.13913	2.77902	2.68213	3.71097	1.69576
MT1A	ENSG00000205362.6	644	6.50602e-05	0.000457234	3.01404	2.9922	2.5936	3.01404	2.87077	-2.19666
MBIP	ENSG00000151332.14	645	2.99099e-06	3.29366e-05	4.06338	1.51967	3.22455	1.34748	2.89952	1.90216
NKRF	ENSG00000186416.8	671	2.48483e-05	0.000202794	3.34397	2.48013	3.49404	2.52452	2.90541	2.80936
SELENBP1	ENSG00000143416.16	672	0.000229495	0.00133954	1.28503	-2.43642	2.1742	1.81103	2.71619	3.08426
SLC7A2	ENSG00000003989.12	672	0.000332204	0.00182269	1.25853	1.27323	-1.21302	1.40602	1.22735	-2.82471
CDC27	ENSG00000004897.7	674	6.28447e-06	6.27124e-05	3.6674	3.04803	3.04498	3.54471	3.20514	1.97596
CD83	ENSG00000112149.5	674	0.000167259	0.00102808	2.91717	-1.07885	2.76068	1.51437	2.10962	2.91717
ALDH2	ENSG00000111275.8	676	2.66719e-05	0.000216097	-1.19257	2.28998	2.89396	1.92504	2.56047	2.28431
BIRC3	ENSG00000023445.9	682	1.51301e-05	0.000135153	3.89764	1.73131	3.91642	2.65463	2.56121	2.91506
NSA2	ENSG00000164346.5	683	4.85071e-06	5.01326e-05	2.26857	1.60887	1.35144	2.19876	1.2806	-1.09231
CRISPLD2	ENSG00000103196.7	691	0.000374096	0.00201229	2.06237	1.20068	1.95154	2.00228	1.89015	2.29644
SPATA20	ENSG00000006282.15	707	1.33277e-05	0.000121661	3.30942	2.69043	2.20293	2.9275	2.19257	2.28943
CNTRL	ENSG00000119397.12	707	3.40729e-05	0.000266644	1.75049	1.14216	2.753	2.42138	2.36613	1.66479
KAT2A	ENSG00000108773.6	708	9.01703e-06	8.60277e-05	3.10584	2.44129	2.79844	2.93004	2.46442	2.51439
NDST4	ENSG00000138653.5	711	3.4471e-05	0.000269377	1.33305	1.08528	1.33305	-3.24249	1.32818	1.33305
SNAI1	ENSG00000124216.3	713	9.4609e-05	0.000637124	2.04982	1.15888	1.17106	1.59693	1.42507	1.89858
BCL2	ENSG00000171791.10	718	4.09559e-05	0.000310435	2.26702	1.87098	1.40363	2.35957	2.23843	-1.79217
CNN3	ENSG00000117519.11	721	1.84841e-05	0.000158898	-2.954	-2.28066	-1.04992	-2.11448	-2.94005	2.25894
VCPIP1	ENSG00000175073.7	724	3.83891e-05	0.000294549	2.43946	2.24496	2.6852	1.6942	2.19587	2.46662
UBR7	ENSG00000012963.9	728	0.000133118	0.00084927	2.50406	1.59431	1.47251	2.35937	2.97364	1.71694
RUNDC1	ENSG00000198863.3	732	0.000137598	0.000874641	2.38599	1.69543	1.76132	2.17239	2.57513	1.30936
BNIP2	ENSG00000140299.7	737	0.000420478	0.00220383	-2.31648	-2.857	-1.68592	-2.10323	-1.08093	-1.25526
LGALS3BP	ENSG00000108679.8	744	6.22193e-05	0.000441444	3.33943	3.07032	-2.00585	-2.26677	2.38366	2.47242
KTN1	ENSG00000126777.13	747	1.08886e-05	0.000101894	2.41149	1.85056	1.11142	1.96523	1.68844	1.30139
HSPB11	ENSG00000081870.7	747	4.76696e-05	0.000351584	2.19831	1.20809	1.61184	3.01131	2.43139	1.07782
DDX59	ENSG00000118197.9	761	0.000512294	0.00259836	-1.06437	-2.41112	-1.47599	-1.83774	-1.09844	-1.5972
USP32	ENSG00000170832.8	767	4.92923e-05	0.000362041	3.29009	2.86162	2.8872	2.38345	2.4466	2.61987
TPM1	ENSG00000140416.15	767	5.6103e-05	0.000404837	-2.36843	-1.81912	-1.04529	-2.86083	-2.4913	-2.44129
TTC37	ENSG00000198677.6	769	0.000192909	0.00115931	1.83652	1.05143	1.12079	1.78929	2.39635	-1.21163
LL22NC03-75H12.2	ENSG00000218357.3	769	0.000380495	0.00203795	2.4773	2.6569	2.45598	2.44506	2.57064	2.72494
CTSV	ENSG00000136943.6	772	0.000219989	0.00129128	2.72798	2.16631	2.57277	1.75116	1.49468	2.66569
PHYKPL	ENSG00000175309.10	775	0.000197766	0.00118485	2.43848	1.52508	2.01708	2.15864	2.62783	1.88081
SULT1A1	ENSG00000196502.7	779	0.000201692	0.00120285	1.41153	1.77976	1.27399	2.28844	2.94946	1.11555
PTDSS1	ENSG00000156471.8	795	0.000119709	0.000774151	1.64812	2.27453	2.597	2.03278	1.75161	-1.03083
SCUBE3	ENSG00000146197.7	801	0.000614964	0.00302111	1.27557	2.30697	-1.06952	2.09058	1.60987	2.04553
SDCCAG8	ENSG00000054282.11	822	2.72853e-05	0.000220041	-3.15896	-1.2326	1.57512	-1.00989	-1.27261	-1.53087
MCMBP	ENSG00000197771.8	823	0.000102786	0.000682492	1.8441	1.35543	2.77411	2.00021	2.61603	1.3606
DCLK1	ENSG00000133083.10	828	0.0004494	0.00232614	1.79575	1.89195	1.76021	1.39782	1.95237	1.97676
TIMP3	ENSG00000100234.11	831	0.000250948	0.00144374	3.44057	3.34956	-1.43626	3.52719	1.21444	2.7297
RNF103	ENSG00000239305.2	832	0.000310481	0.00172653	2.42097	1.25728	2.54141	1.01213	3.21709	1.34906
ZNF90	ENSG00000213988.5	832	0.000376821	0.00202345	2.54072	2.43913	2.05493	2.26198	2.36292	1.83524
RANBP17	ENSG00000204764.8	833	3.05605e-05	0.00024233	-1.37376	-1.13436	-1.12366	-1.30656	-1.57576	-2.02724
BCL6	ENSG00000113916.13	835	0.000418034	0.00219503	2.67981	-1.13491	1.94041	1.31237	1.29149	2.84573
ZNF92	ENSG00000146757.9	839	0.000321077	0.00177535	2.27604	1.75616	1.68854	1.74563	2.91367	2.04322
RGS16	ENSG00000143333.6	842	5.79927e-05	0.000415597	1.15517	1.62528	3.15057	3.18209	1.83064	1.15395
TXNDC16	ENSG00000087301.4	848	0.000453219	0.00234393	2.21824	1.87708	1.98499	1.61442	2.08564	2.17444
LCMT1	ENSG00000205629.7	851	0.000106275	0.000700601	1.31055	1.35828	3.29608	1.54499	2.83166	1.87772
DHX40	ENSG00000108406.5	857	0.000862712	0.00399355	1.74902	2.36098	1.6723	1.30141	1.81878	1.33928
AURKA	ENSG00000087586.13	865	0.000989274	0.00448125	2.35931	1.89292	2.44081	1.44352	2.0782	2.68927
TUBA1A	ENSG00000167552.9	873	0.000119027	0.000770054	-2.97925	-1.14774	-3.58213	-2.05114	-2.80986	-2.54538
FAM65B	ENSG00000111913.11	873	0.000345813	0.00188283	2.15972	1.5612	2.15972	2.02315	1.95447	2.13709
HIST1H2AG	ENSG00000196787.2	875	0.000396976	0.00210925	2.18605	2.02373	2.23121	2.08428	2.16622	2.24279
HOXC6	ENSG00000197757.7	878	0.000224458	0.00131259	1.91621	1.70133	1.54116	1.93454	1.98342	1.48484
ZNF100	ENSG00000197020.6	889	0.000473718	0.00242879	1.65746	2.15522	2.48204	2.72086	3.20166	2.49304
PDHB	ENSG00000168291.8	891	0.000135947	0.000865555	1.58541	1.52708	3.18662	1.13377	2.43337	-1.46557
MFSD8	ENSG00000164073.5	897	0.000145277	0.000912697	2.62512	2.81493	3.28331	2.7728	3.00477	2.49549
FARP1	ENSG00000152767.11	899	0.000424366	0.00222082	-1.25695	-1.51114	-2.63965	-1.92468	-1.74559	-2.63898
IKZF3	ENSG00000161405.12	907	0.000276536	0.00156787	1.31486	1.81358	2.57389	2.16108	2.45536	2.06799
ZNF597	ENSG00000167981.4	915	0.000361093	0.00195377	2.67351	2.8775	2.8486	3.01485	3.02794	2.51389
SMIM4	ENSG00000168273.3	916	0.000288136	0.00162246	2.06781	2.81024	2.4264	3.14575	2.09552	-1.91125
INTS6	ENSG00000102786.10	921	0.000277229	0.00157066	1.75775	2.01153	2.88409	1.66594	2.80769	2.31371
HHEX	ENSG00000152804.6	921	0.000298269	0.0016705	1.78718	1.51256	1.78718	1.7755	1.78206	1.78718
UBN2	ENSG00000157741.10	924	0.000156081	0.000968508	1.53244	1.68269	2.2965	1.99316	1.43785	1.67426
SP140L	ENSG00000185404.12	929	0.000726383	0.00346294	1.56032	1.71864	1.59589	1.46721	2.21904	2.29382
HSPA4L	ENSG00000164070.7	932	0.000716814	0.00342673	1.88488	2.42443	2.44821	2.06129	1.52963	1.29876
CDKN3	ENSG00000100526.15	934	0.000972545	0.00441827	1.7703	1.69677	2.78766	2.20114	2.52911	2.96374
GLMN	ENSG00000174842.12	937	0.000152829	0.000951727	1.48282	1.88554	2.97631	2.82698	2.30724	1.36847
APBB2	ENSG00000163697.12	938	0.000326227	0.00179557	1.25103	2.41473	1.80476	2.67657	2.59436	2.2643
ADAMTS19	ENSG00000145808.4	939	0.00030247	0.00168756	2.27709	2.17827	2.27709	2.27709	2.27709	2.27709
EXOC4	ENSG00000131558.10	941	0.000277103	0.00157052	1.79887	2.50231	2.91523	2.7713	2.52033	1.54175
SORL1	ENSG00000137642.8	949	0.000339718	0.00185611	1.1441	1.32596	2.16106	1.20919	2.06606	1.92308
UBE2D1	ENSG00000072401.10	951	0.000690984	0.00332561	2.46558	1.51313	2.64498	2.08646	3.08398	2.29646
DLK1	ENSG00000185559.9	954	0.000291932	0.00163912	3.24964	3.27019	3.27019	3.27019	3.27019	3.27019
HEATR5A	ENSG00000129493.10	960	0.000105283	0.00069523	2.90482	2.51251	2.9354	2.3021	2.15234	2.20473
HIF1A	ENSG00000100644.12	968	0.00170704	0.00701155	-2.19466	-2.74876	-1.42618	-1.99038	-2.09538	-2.23228
ATF7IP2	ENSG00000166669.9	969	0.000857722	0.00397281	1.31993	2.82608	1.52909	1.90802	2.99639	2.46863
EMP1	ENSG00000134531.5	973	0.000292596	0.00164226	2.14777	-2.49525	-3.21689	-3.32322	-2.39382	2.55038
C12orf65	ENSG00000130921.3	978	0.00021938	0.00128819	2.10532	1.66742	2.65891	2.48552	2.40204	1.56752
MCM6	ENSG00000076003.4	979	0.000221696	0.00129955	1.17496	1.28973	2.69787	1.59816	1.65381	1.94295
SHISA2	ENSG00000180730.4	983	0.00100464	0.00452987	3.2727	1.80291	3.14273	3.53366	3.32174	3.54894
SDHB	ENSG00000117118.5	995	0.00206255	0.00822337	-1.44311	1.05765	2.46659	1.2793	2.43773	-2.43968
GBP3	ENSG00000117226.7	997	0.000826139	0.00384932	2.28857	2.64118	2.83758	1.93807	2.46104	2.28513
ZNF431	ENSG00000196705.4	997	0.000860334	0.00398373	2.1129	1.14835	1.96907	1.72273	2.41713	1.99785
SLC27A5	ENSG00000083807.5	999	0.0021142	0.00839718	1.52408	1.55651	1.90388	1.95096	1.07012	-3.13194
S100G	ENSG00000169906.5	1003	0.000355879	0.00193091	2.57132	2.57132	2.57132	2.57132	2.57132	2.57132
AP1G1	ENSG00000166747.8	1007	0.000110918	0.000724187	2.44187	1.69379	1.46407	1.76154	2.27507	1.74809
TACC1	ENSG00000147526.15	1017	0.00114344	0.00503094	2.50697	-1.58511	1.81732	-1.3692	1.44729	2.44499
MED6	ENSG00000133997.7	1025	0.00103149	0.00463091	1.96526	2.07068	2.38008	2.30741	2.75908	1.64793
AMFR	ENSG00000159461.10	1028	0.000405212	0.00214427	2.42061	2.05859	-1.8453	1.91415	2.46854	-1.66565
KAT7	ENSG00000136504.7	1032	0.000139579	0.000884001	2.84478	2.40244	2.07269	1.55551	2.29676	1.58325
NUDT21	ENSG00000167005.9	1040	0.00014874	0.000930338	2.88618	1.99397	1.82678	1.28794	2.23488	2.11199
DCP2	ENSG00000172795.11	1042	0.00046796	0.00240648	2.94556	2.12373	2.24056	2.13247	2.84962	1.79587
C9orf89	ENSG00000165233.13	1045	0.000320941	0.00177522	1.12075	1.76823	2.4145	2.44647	1.91245	-1.60863
RARS	ENSG00000113643.4	1046	0.000347188	0.00188834	1.51869	1.62689	2.67467	2.69859	1.40555	-1.03079
ZNF292	ENSG00000188994.8	1048	0.00124282	0.00538933	-1.07222	-1.76629	1.75914	-2.45943	-1.08372	-2.47486
PIEZO1	ENSG00000103335.15	1050	0.0001587	0.000981257	2.95972	1.3339	2.53742	2.11597	1.92819	1.61319
LGMN	ENSG00000100600.10	1055	0.000933465	0.00426926	2.22736	1.08415	2.46872	1.44985	2.57289	1.31113
SESTD1	ENSG00000187231.9	1059	0.00137965	0.00587515	1.18413	1.5245	2.81976	1.29829	1.44838	3.01524
RGS1	ENSG00000090104.7	1061	0.000993903	0.00449441	2.90664	-1.25186	2.87142	1.03418	2.00782	2.89076
ANKHD1-EIF4EBP3	ENSG00000254996.1	1069	0.000190548	0.00114935	2.62293	1.418	2.11643	2.00325	1.9878	1.16858
KIAA0922	ENSG00000121210.11	1077	0.000376683	0.00202345	1.68382	1.49036	2.06785	1.67329	1.38465	1.13756
PTGES3L	ENSG00000267060.1	1083	0.00120126	0.00523817	2.10632	1.8889	2.03925	2.19276	2.22904	2.22904
PITPNC1	ENSG00000154217.10	1087	0.000885822	0.00408722	1.9598	1.89516	2.0726	1.26083	2.0536	2.01916
CHKA	ENSG00000110721.7	1099	0.00041827	0.00219553	2.05298	-1.23976	2.67688	2.1114	2.16132	2.20802
TNFSF10	ENSG00000121858.6	1103	0.000230347	0.001343	-3.85028	-2.0751	1.3793	1.71617	1.67928	2.87402
KPNB1	ENSG00000108424.5	1105	0.000235071	0.00136698	2.49516	1.564	2.05278	1.83139	2.10248	1.34761
NOMO1	ENSG00000103512.10	1126	0.00182177	0.00739539	-1.66257	-1.54156	-1.18731	-1.07635	-1.32989	-2.18467
HSD17B1	ENSG00000108786.6	1127	0.00183023	0.00742201	1.55359	1.6703	1.73119	1.85242	1.31878	1.83144
NSDHL	ENSG00000147383.6	1130	0.000520634	0.00263127	1.30522	2.42449	2.85811	1.46384	2.29612	1.45562
OLFML3	ENSG00000116774.7	1138	0.00125318	0.00543278	2.20786	2.17909	2.00362	2.20786	1.74354	1.69843
ZNF34	ENSG00000196378.7	1141	0.000496465	0.00252996	2.12395	2.38515	3.33706	2.3518	2.62719	2.6626
GLRX5	ENSG00000182512.4	1149	0.00168261	0.00692507	1.55339	1.99674	1.74865	1.99914	2.03572	1.25969
LYPD6B	ENSG00000150556.12	1150	0.00226285	0.0088771	2.3297	2.36192	2.08257	1.84061	2.26041	2.09759
ZNF486	ENSG00000256229.3	1154	0.00132139	0.00566562	2.27693	2.19412	1.61282	2.29265	2.03851	1.62859
OCEL1	ENSG00000099330.4	1159	0.000864201	0.0039985	2.69259	2.44836	2.85799	3.01391	2.9666	2.49801
KRT20	ENSG00000171431.3	1160	0.000824844	0.00384788	1.15877	1.15149	1.15877	-2.8253	1.15877	1.15877
PPM1D	ENSG00000170836.7	1161	0.000330113	0.00181245	1.99295	1.03256	1.65229	1.32185	1.24999	1.56262
ADORA2A	ENSG00000128271.15	1164	0.000853011	0.00395333	1.1772	1.25182	1.49458	1.56277	1.54192	1.07892
AVPI1	ENSG00000119986.6	1168	0.00059788	0.00294644	2.7894	2.24797	2.76828	2.55919	2.68583	1.93844
DNAL1	ENSG00000119661.10	1168	0.00142758	0.00604801	2.42648	2.41092	1.09648	2.57044	1.84888	1.49922
LRRTM2	ENSG00000146006.7	1171	0.00137037	0.00584521	1.99717	1.61323	2.0145	1.22746	2.13887	1.82093
TMEM126B	ENSG00000171204.8	1175	0.000565835	0.00281782	1.47911	1.38785	2.58609	1.91902	1.40185	-1.08184
ANKRD13A	ENSG00000076513.12	1178	0.00051485	0.00260709	2.75208	1.52384	2.44366	2.80737	2.4609	1.17056
IFI35	ENSG00000068079.3	1184	0.00038359	0.00204856	2.70884	1.76157	2.0157	2.32835	1.68377	1.98727
EGFL8	ENSG00000241404.2	1193	0.00248262	0.00960908	1.12297	1.31038	1.07184	1.05342	1.24572	1.31038
INTS2	ENSG00000108506.7	1196	0.000988087	0.00447847	1.88089	1.76932	1.91991	1.34511	1.57758	1.53622
CCDC53	ENSG00000120860.6	1205	0.00103062	0.00462963	2.49892	2.34367	1.27579	2.86176	2.2873	1.87648
OSBPL8	ENSG00000091039.12	1207	0.000429297	0.00224287	2.34821	1.31912	1.88546	1.23178	2.05861	1.86901
CENPE	ENSG00000138778.7	1207	0.00260527	0.00998497	1.56164	1.81988	2.34671	1.81681	1.83678	2.30145
HIST1H2AD	ENSG00000196866.2	1219	0.00109458	0.00484889	2.47906	1.95087	2.34341	2.7603	2.52426	1.02534
TRMT12	ENSG00000183665.4	1226	0.000709828	0.0033954	2.19924	2.06328	2.5516	2.10715	1.54159	-1.36281
MTERFD3	ENSG00000120832.5	1226	0.00113281	0.004994	1.83168	1.07078	1.95819	2.84718	2.52476	1.43338
FRS2	ENSG00000166225.4	1229	0.00237443	0.00924064	1.09861	1.9217	2.20123	1.87735	2.51475	1.24441
CTPS2	ENSG00000047230.10	1240	0.0007527	0.00356126	1.02633	1.68582	2.46684	1.69278	2.16757	2.21356
TSC22D3	ENSG00000157514.12	1244	0.00125438	0.00543629	1.08614	-2.2432	2.27621	2.65099	2.70637	1.32423
POTEC	ENSG00000183206.12	1248	0.000779318	0.00366392	1.97978	1.8663	1.97978	1.97978	1.97978	1.40817
CSTA	ENSG00000121552.3	1251	0.000524646	0.00264641	-3.07432	2.08116	-1.77024	2.35351	1.85247	2.40476
GPR89A	ENSG00000117262.14	1282	0.000901602	0.00414292	2.06923	1.15723	2.53797	1.89596	1.32408	1.95526
HIST1H4E	ENSG00000198518.5	1301	0.000739793	0.00351401	3.03442	2.52495	2.36317	2.83429	2.48116	1.83446
RSBN1	ENSG00000081019.9	1338	0.000822504	0.0038404	2.48422	1.77637	2.30464	1.55114	1.64431	1.96258
HIST1H2AL	ENSG00000198374.3	1342	0.00122989	0.00534066	2.19013	1.93861	2.26297	1.9463	2.19972	2.04161
GRB14	ENSG00000115290.5	1369	0.00229381	0.00898055	-1.71067	2.37813	2.44917	2.40284	2.35876	1.71635
IRS1	ENSG00000169047.5	1372	0.00235848	0.00919001	1.58367	1.49994	1.36866	1.59702	1.41479	1.01379
CAMLG	ENSG00000164615.3	1399	0.00150986	0.00633648	2.41113	1.33978	1.0779	1.33798	1.28255	-2.27261
GMPR2	ENSG00000100938.13	1407	0.00176386	0.00720706	2.69745	2.37425	2.4157	2.5615	2.06585	2.38613
POLH	ENSG00000170734.7	1419	0.00113758	0.0050108	1.83276	1.13651	1.74657	1.36458	1.05422	1.33992
HAUS7	ENSG00000213397.6	1429	0.00158088	0.00657742	2.18206	1.27436	2.55209	1.66472	1.97473	1.54604
GOSR2	ENSG00000108433.11	1429	0.00252148	0.0097282	2.59202	2.08056	1.86612	2.84118	1.9927	1.06351
FAHD2B	ENSG00000144199.7	1460	0.00196995	0.00790255	1.80827	2.10512	2.47331	2.25053	1.31214	2.09488
FBXW7	ENSG00000109670.9	1470	0.00137521	0.00586104	2.33931	1.50258	2.42119	1.3657	1.07186	1.65802
ATP6V0A1	ENSG00000033627.10	1478	0.0014193	0.00602104	2.21394	1.09626	2.02356	1.92144	1.73933	1.04332
NUP93	ENSG00000102900.8	1487	0.00190138	0.00766855	2.15685	2.01953	2.7007	-1.14948	1.43717	1.26114
TMEM70	ENSG00000175606.6	1563	0.00240784	0.00935439	1.56544	1.74372	2.42366	1.40071	1.05946	-1.2079
ZNF430	ENSG00000118620.8	1593	0.00225339	0.00884474	2.62401	1.40436	2.54239	1.68988	2.31278	1.8931

## Sheet: C7
# Supplementary table 4.7. DEGs of lncRNA subtypes (C7)
Name	Ensembl_ID	Top	p.value	FDR	logFC.1	logFC.2	logFC.3	logFC.4	logFC.5	logFC.6
PLA2G16	ENSG00000176485.6	1	2.54335e-31	7.95407e-28	3.37524	7.30075	7.0755	7.29309	6.46159	2.2575
ALCAM	ENSG00000170017.8	1	5.36748e-25	5.59541e-22	3.51342	1.84339	5.24156	6.74474	5.87407	7.50907
MGLL	ENSG00000074416.9	1	1.53171e-24	1.4089e-21	4.71886	7.74058	8.28252	5.18759	7.76204	6.17984
CNN3	ENSG00000117519.11	2	1.28414e-32	6.69335e-29	-5.21294	-4.5396	-3.30886	-4.37342	-5.19899	-2.25894
RPL7	ENSG00000147604.9	2	9.78551e-26	1.10391e-22	2.84984	2.74811	4.77787	3.18386	2.09516	1.38701
ACY1	ENSG00000243989.3	3	3.15446e-28	7.04661e-25	5.99411	6.24529	5.74883	5.80081	5.16538	4.74217
EMC2	ENSG00000104412.3	4	2.11368e-24	1.73956e-21	1.9406	3.605	6.67975	3.05109	2.32281	3.14468
CNKSR3	ENSG00000153721.13	4	2.04141e-19	6.21837e-17	5.32001	3.14638	5.88123	3.38906	5.43193	6.02383
NIPAL2	ENSG00000104361.5	4	1.66857e-17	3.10611e-15	3.80103	4.00573	4.57172	3.26023	3.95555	4.91849
RPL8	ENSG00000161016.11	6	9.4948e-26	1.10391e-22	1.28358	3.36873	4.36846	2.93345	1.5627	1.48925
SYCP2	ENSG00000196074.8	6	1.3794e-15	1.58601e-13	-4.01085	-4.32833	-1.04472	-2.19912	-1.98731	-6.39095
CD37	ENSG00000104894.7	7	1.42584e-21	7.43197e-19	-4.43107	-4.9318	-1.11904	-2.45464	-2.37835	-4.0909
GARS	ENSG00000106105.9	9	1.28158e-21	7.0348e-19	4.46996	3.29898	6.62925	3.31684	3.44753	3.91677
GSTA4	ENSG00000170899.6	9	1.52919e-19	4.98165e-17	-4.80553	-2.02491	-1.03043	-2.33763	-1.53383	-2.31051
DUSP6	ENSG00000139318.7	10	1.01936e-20	4.08711e-18	-2.31125	-4.82676	-1.1597	-7.18681	-1.20408	-1.75412
GPRC5A	ENSG00000013588.5	10	2.421e-15	2.59296e-13	-3.85338	-5.79396	-3.73178	-3.23994	-4.02287	-6.8256
NOSTRIN	ENSG00000163072.10	10	8.84015e-15	8.58593e-13	3.7944	3.71699	4.7122	5.19857	5.75008	5.233
STOML2	ENSG00000165283.11	11	3.79582e-21	1.72477e-18	1.36639	3.37005	5.35461	3.04643	2.51238	2.5165
FAM107B	ENSG00000065809.9	11	1.13685e-14	1.08396e-12	5.26923	1.28295	4.34574	3.39336	5.89001	1.18568
SERPINB6	ENSG00000124570.13	12	2.01628e-21	1.01705e-18	3.29272	6.11927	4.16546	3.36448	5.06354	1.85321
ZFAND1	ENSG00000104231.6	12	3.86052e-21	1.72477e-18	2.50187	4.07891	6.79727	3.97908	4.44171	4.07048
LGALS3	ENSG00000131981.11	13	3.39216e-21	1.60737e-18	-2.04532	-6.43801	-2.78526	-3.84423	-4.7921	-5.29553
ZHX1	ENSG00000165156.10	13	5.80533e-21	2.45346e-18	4.17805	2.65359	5.05244	2.63189	3.07219	4.56473
BARX2	ENSG00000043039.5	13	4.14354e-16	5.58556e-14	3.4621	4.25959	4.35725	4.33515	3.76524	5.14245
LYPLA1	ENSG00000120992.13	14	9.48986e-21	3.90508e-18	1.61705	1.16202	6.14059	3.71634	3.33546	1.14538
SLC48A1	ENSG00000211584.9	14	1.34299e-19	4.46814e-17	1.93151	3.72624	3.82124	4.9144	3.97277	2.36503
MRPS30	ENSG00000112996.5	14	5.18e-18	1.09459e-15	5.25167	4.52841	1.26145	4.21143	4.57165	3.53725
FAM198B	ENSG00000164125.11	14	6.96254e-16	8.37486e-14	8.27381	7.20057	7.49033	6.58019	7.98741	7.20047
MAGED1	ENSG00000179222.13	15	1.69603e-19	5.30415e-17	-3.77012	-4.94423	-2.93146	-5.73938	-3.87324	-4.44971
DDAH2	ENSG00000213722.4	16	2.06789e-19	6.21837e-17	-1.43937	-3.14283	-2.32058	-4.66582	-2.04323	-3.72066
S100A14	ENSG00000189334.4	17	6.45806e-20	2.2441e-17	4.03686	6.68681	3.70522	1.589	4.20824	2.51464
CBX6	ENSG00000183741.7	17	2.19135e-19	6.46531e-17	1.40125	3.83015	3.73975	4.18902	2.63682	3.26375
MRPL13	ENSG00000172172.3	18	2.58589e-19	7.48808e-17	1.11448	2.07314	6.1729	2.73434	2.27061	1.18823
RPL14	ENSG00000188846.9	18	5.79864e-18	1.17758e-15	1.51644	1.98584	2.33385	3.41517	2.1977	2.10464
NBN	ENSG00000104320.9	18	4.70252e-14	3.82986e-12	1.70212	3.2099	4.3081	2.72251	4.4019	1.19595
COMMD5	ENSG00000170619.8	19	3.87078e-19	1.08085e-16	3.39076	5.38307	6.03698	4.41193	3.89503	4.90881
SMIM4	ENSG00000168273.3	19	4.33609e-19	1.18954e-16	3.97906	4.72148	4.33765	5.057	4.00676	1.91125
RPSA	ENSG00000168028.9	19	2.1986e-13	1.50129e-11	1.45478	1.94361	2.39376	3.22225	1.8943	2.24836
RMDN1	ENSG00000176623.7	20	3.55652e-14	3.02756e-12	3.3923	2.90893	4.66511	4.20562	4.38486	2.0957
LGR4	ENSG00000205213.9	21	1.46909e-13	1.05862e-11	4.55912	3.73085	5.58531	5.39251	5.04016	5.41222
PDGFA	ENSG00000197461.9	22	3.30711e-13	2.19124e-11	3.46557	4.79849	5.3805	6.06502	3.80899	5.81214
CLDN12	ENSG00000157224.11	23	4.567e-13	2.92681e-11	3.03141	4.20343	4.63929	4.30177	3.39299	5.36535
PPIA	ENSG00000196262.9	24	2.48922e-18	5.48225e-16	1.75981	1.64353	2.63325	2.81365	2.15491	1.00014
RPL29	ENSG00000162244.6	24	2.82241e-16	4.04899e-14	1.83162	2.89223	1.95842	3.0351	2.06996	2.06095
MPV17	ENSG00000115204.10	24	4.21149e-16	5.62864e-14	2.92513	5.30403	4.99891	3.96788	5.03996	3.99811
RPL30	ENSG00000156482.6	25	5.12266e-18	1.09459e-15	1.34997	1.91735	1.64263	2.37516	1.27384	1.26913
ANKRD30B	ENSG00000180777.9	25	3.17086e-16	4.38837e-14	6.15186	7.14044	6.45897	7.16927	7.28062	1.36001
MGP	ENSG00000111341.5	25	1.73203e-15	1.90731e-13	-14.1547	-1.39122	-12.0856	-2.41985	-8.79367	-10.2955
QARS	ENSG00000172053.10	26	7.54544e-17	1.25519e-14	4.34752	3.88746	2.76804	2.64904	3.85201	1.86371
SPAG1	ENSG00000104450.8	27	1.52139e-13	1.0863e-11	3.0505	3.47108	4.32877	1.84163	4.59118	3.5912
ABHD2	ENSG00000140526.12	27	8.20582e-13	4.92257e-11	4.53946	3.86514	4.65611	4.05262	5.0572	5.4756
NIT2	ENSG00000114021.7	29	3.08521e-17	5.48221e-15	1.66444	1.03267	3.52076	5.27758	3.50744	1.63398
EEF1D	ENSG00000104529.13	30	3.50019e-17	6.14971e-15	3.03919	3.83431	6.62125	3.36092	2.12324	2.18309
SRI	ENSG00000075142.9	30	3.6432e-17	6.32986e-15	3.50485	4.32194	5.48266	6.82049	3.90209	5.43841
IMPDH2	ENSG00000178035.7	30	1.97595e-16	2.9998e-14	4.93941	4.3845	5.04433	4.55334	4.30129	3.59496
PRKACB	ENSG00000142875.15	30	5.96877e-13	3.74834e-11	7.10573	6.30169	7.89367	7.12355	7.38132	6.95954
RPSAP58	ENSG00000205246.4	32	6.76767e-17	1.15028e-14	1.10618	2.32276	2.12652	3.76758	2.47886	1.32919
TATDN1	ENSG00000147687.12	32	1.3887e-16	2.19345e-14	2.79715	3.35643	5.93112	3.9872	3.12106	2.88195
NSA2	ENSG00000164346.5	32	2.81904e-16	4.04899e-14	3.36088	2.70118	2.44375	3.29107	2.37291	1.09231
RPL32	ENSG00000144713.8	32	5.64827e-15	5.7352e-13	1.51074	1.37472	1.98494	2.68162	1.57233	1.93218
CISD1	ENSG00000122873.7	33	1.72511e-16	2.67085e-14	1.17343	2.93341	4.93813	3.68453	3.45219	1.7809
CHMP4C	ENSG00000164695.4	33	4.18773e-13	2.70593e-11	2.99845	4.18776	4.42827	2.4426	2.97309	4.69087
NQO2	ENSG00000124588.15	33	6.31025e-13	3.91561e-11	4.19825	4.01891	4.97325	4.42835	4.77509	3.65122
ERBB4	ENSG00000178568.9	34	3.49826e-12	1.75328e-10	4.21393	4.45613	4.31752	4.54906	5.39112	5.11681
RPL13A	ENSG00000142541.12	38	1.71076e-16	2.67085e-14	1.25398	1.30477	2.57241	2.55864	1.4589	1.17097
EIF3H	ENSG00000147677.6	38	5.48098e-16	6.80207e-14	2.35461	2.32896	3.38115	3.28391	2.20674	1.24115
UBE2W	ENSG00000104343.15	39	3.14006e-16	4.38837e-14	1.51535	2.81519	5.11906	2.20979	3.32761	1.95301
ANAPC13	ENSG00000129055.8	39	4.60175e-16	5.99647e-14	2.011	3.01765	4.77151	5.15703	4.26622	2.47579
NINJ1	ENSG00000131669.5	39	1.67774e-12	9.20522e-11	2.33068	3.59078	3.60967	4.33487	4.44816	2.60029
GBAS	ENSG00000146729.5	41	5.19243e-11	1.85799e-09	2.74078	2.76693	3.58553	2.61584	3.11009	4.42931
BCL2	ENSG00000171791.10	42	1.82107e-12	9.85329e-11	4.0592	3.66315	3.1958	4.15174	4.0306	1.79217
ICA1	ENSG00000003147.13	42	2.84797e-11	1.10232e-09	2.18754	1.69962	2.60415	4.49915	2.67486	5.25622
UQCRB	ENSG00000156467.5	43	4.32479e-16	5.73108e-14	1.85669	1.88315	3.47965	2.81885	1.65302	1.35669
EIF3E	ENSG00000104408.5	43	4.71617e-16	6.09478e-14	1.88677	3.2724	5.19982	4.07315	2.35109	1.83238
TM4SF18	ENSG00000163762.2	45	8.43577e-15	8.24438e-13	-1.71759	-3.45941	-2.03508	-2.67373	-1.29801	-2.83786
GTF2F2	ENSG00000188342.7	45	2.64466e-11	1.03386e-09	3.11646	3.92872	4.04565	2.99047	3.7154	4.46643
TMED3	ENSG00000166557.8	47	4.39397e-11	1.59047e-09	2.60266	2.15753	2.76144	2.90545	4.08913	5.41253
RPL3	ENSG00000100316.11	48	2.47643e-15	2.63428e-13	1.61884	1.6265	1.54211	2.75608	1.35691	1.18775
LDHB	ENSG00000111716.8	49	1.13253e-15	1.33153e-13	9.57011	5.29229	7.88107	1.65914	2.46258	6.12814
SYTL2	ENSG00000137501.12	50	5.49926e-12	2.63779e-10	5.54609	5.82773	4.95932	6.73069	6.56787	2.02396
C1QBP	ENSG00000108561.4	52	9.09513e-15	8.77904e-13	2.49698	3.67785	5.12505	2.31497	4.29301	2.40011
TSPAN6	ENSG00000000003.10	53	6.87961e-15	6.89592e-13	-3.65449	-1.90651	-1.65633	-3.92925	-3.60144	-1.97298
RPS28	ENSG00000233927.4	53	1.35688e-12	7.77198e-11	1.18578	1.75848	1.86011	1.89661	1.20137	1.68989
AP1M2	ENSG00000129354.7	53	1.59408e-12	8.90235e-11	2.06716	2.93136	3.53696	4.33463	4.00899	1.86602
RWDD1	ENSG00000111832.8	54	5.21993e-15	5.33491e-13	2.90313	2.07673	4.39688	2.55398	2.53973	2.79788
RPL4	ENSG00000174444.10	54	7.83819e-15	7.75733e-13	1.20565	1.29196	1.88974	2.28485	1.83821	1.03172
KAT6B	ENSG00000156650.8	54	1.64552e-11	6.93558e-10	2.48806	1.56297	4.14289	1.34636	4.49105	3.03725
ERCC1	ENSG00000012061.11	55	1.67067e-11	7.00382e-10	1.48957	2.65515	3.72752	3.71092	2.57237	4.58078
MAST4	ENSG00000069020.14	55	1.76832e-11	7.39337e-10	4.25172	3.83036	2.07516	3.8993	4.54294	4.04788
PUF60	ENSG00000179950.9	56	7.73665e-15	7.7056e-13	1.45418	3.43246	5.12188	2.22939	2.59866	2.58302
CYC1	ENSG00000179091.4	58	1.8766e-14	1.69621e-12	2.06929	3.63261	5.55098	3.22944	2.193	3.14565
CXADR	ENSG00000154639.14	58	2.0181e-10	5.99944e-09	5.26416	-1.73346	4.72394	2.10892	2.01829	5.227
RPL26	ENSG00000161970.8	59	1.47621e-14	1.34991e-12	1.5733	2.2707	3.0175	3.22772	1.16601	1.39241
AHCY	ENSG00000101444.8	59	2.19919e-14	1.96507e-12	1.91526	2.9104	4.97754	3.13717	4.14119	1.79209
COA4	ENSG00000181924.6	59	4.84893e-14	3.90838e-12	1.11822	2.70407	2.81209	4.92946	3.65055	2.24497
HIPK2	ENSG00000064393.11	59	4.09596e-10	1.12823e-08	2.7026	2.85071	2.74708	2.17543	2.76489	3.89031
PGRMC2	ENSG00000164040.12	61	2.56084e-14	2.27522e-12	1.87952	2.35583	4.31903	3.1701	3.14806	2.71259
MRPL32	ENSG00000106591.3	64	8.21635e-13	4.92257e-11	2.7444	3.33986	3.69272	4.73718	4.4964	4.16319
ADIRF	ENSG00000148671.9	64	1.94182e-11	7.93429e-10	-4.80398	-2.68733	-6.71268	-1.97961	-1.78751	-5.54085
NDUFB9	ENSG00000147684.3	66	5.47321e-14	4.36656e-12	1.69797	1.40005	4.48519	2.51849	2.67085	1.33451
DUSP16	ENSG00000111266.4	66	3.31756e-11	1.25306e-09	3.52585	3.7131	4.10656	1.90308	4.35546	2.7965
YWHAZ	ENSG00000164924.13	67	8.00525e-14	6.10898e-12	2.24222	1.2989	2.83474	1.90437	2.39498	1.37847
GAD1	ENSG00000128683.9	67	1.61449e-10	4.99916e-09	6.40015	6.43948	6.25293	6.39383	6.4466	6.46098
ESRP1	ENSG00000104413.11	68	9.84946e-14	7.36919e-12	1.6886	1.46654	5.22651	1.91864	2.50098	2.48556
YAE1D1	ENSG00000241127.3	68	4.08569e-11	1.49271e-09	3.08915	4.06159	4.7292	4.21101	4.72829	4.76291
PHLDB2	ENSG00000144824.15	68	7.02742e-10	1.83452e-08	4.84927	1.15682	4.44122	3.97926	4.37169	5.33094
DLD	ENSG00000091140.8	70	1.19561e-13	8.73635e-12	2.42086	3.21173	5.02998	3.85328	3.54279	2.83008
ARHGDIB	ENSG00000111348.4	70	2.82345e-12	1.46193e-10	-4.8808	-5.54613	-5.24379	-1.69859	-3.8918	-6.25919
MRPL3	ENSG00000114686.4	70	8.39937e-12	3.87436e-10	1.5187	1.98542	4.1644	3.04495	3.9083	2.66438
AFMID	ENSG00000183077.11	71	2.6361e-13	1.76157e-11	1.0681	1.6392	1.37231	4.73694	2.3256	2.48792
PPP3CA	ENSG00000138814.12	71	1.7135e-09	3.9991e-08	4.32981	4.66572	4.93728	1.38903	2.61666	5.82051
RPS19	ENSG00000105372.2	74	2.1769e-13	1.49299e-11	1.38364	1.24591	2.61879	1.64849	1.03923	1.22996
GSTM3	ENSG00000134202.6	74	1.63467e-12	9.03226e-11	4.95784	6.47405	2.55477	6.63711	4.43763	-1.9253
CTDSPL	ENSG00000144677.10	74	3.32849e-11	1.25416e-09	2.46178	3.13124	4.25618	3.54983	4.16588	3.97142
MRPS28	ENSG00000147586.5	75	1.65441e-12	9.10915e-11	2.5875	3.3551	4.02549	3.19385	3.45025	2.99453
SFXN1	ENSG00000164466.8	75	3.22662e-11	1.22166e-09	1.08466	3.49735	4.55947	4.41202	4.60176	3.26757
PHF20L1	ENSG00000129292.16	76	2.50899e-13	1.6984e-11	2.152	4.09979	5.25462	1.80098	1.82584	1.80427
RPL22L1	ENSG00000163584.13	77	4.54116e-13	2.92223e-11	3.66817	1.8131	4.78812	6.07003	3.07118	3.52455
PMPCB	ENSG00000105819.9	78	8.55753e-11	2.909e-09	1.75532	3.24965	3.63413	3.39628	4.25169	3.31719
RNASEK-C17orf49	ENSG00000161939.14	78	6.52866e-09	1.27611e-07	1.04964	1.626	1.73086	1.45016	1.47643	2.31741
ZNF706	ENSG00000120963.7	80	4.03815e-13	2.62011e-11	1.83788	3.14991	4.7653	2.49143	3.03154	1.27554
CKB	ENSG00000166165.8	81	1.26812e-12	7.31717e-11	4.17724	2.89959	6.45355	4.3184	5.24495	4.83096
DSP	ENSG00000096696.9	81	1.18799e-10	3.87819e-09	-4.07703	-5.05338	-3.1979	-5.3552	-5.01542	-4.60662
MAPT	ENSG00000186868.11	82	4.12919e-09	8.65442e-08	2.32035	2.94613	1.31343	3.43232	3.10502	3.53124
EMC3	ENSG00000125037.8	85	1.90602e-13	1.33055e-11	3.54005	2.30367	3.11668	3.10507	2.95424	2.28126
KAZN	ENSG00000189337.11	85	5.94927e-09	1.18057e-07	3.33408	3.74279	3.59646	3.59562	3.68816	3.93656
METTL5	ENSG00000138382.9	86	6.19506e-13	3.87488e-11	1.10904	2.88092	5.70449	3.77741	2.87435	3.29691
ARPC1B	ENSG00000130429.8	87	1.54631e-12	8.72911e-11	2.09629	1.94617	3.67082	4.51179	2.27324	2.33196
TTC39C	ENSG00000168234.8	87	1.35177e-10	4.3138e-09	2.47421	3.87723	3.98374	3.16328	4.14507	4.45701
MFSD1	ENSG00000118855.14	87	2.33313e-09	5.27169e-08	3.77269	2.44906	3.48466	3.79041	2.86306	4.46369
SYBU	ENSG00000147642.12	88	3.70531e-11	1.37298e-09	5.75193	5.12053	4.33512	4.09538	5.01649	4.68487
FIS1	ENSG00000214253.4	89	9.64984e-12	4.41212e-10	2.05644	3.84156	3.79003	2.95468	3.37693	2.8085
ASNS	ENSG00000070669.12	89	9.88933e-11	3.28322e-09	4.82845	5.10317	5.35679	5.59787	5.60602	4.20788
MRPL54	ENSG00000183617.4	90	1.7835e-10	5.47909e-09	1.94712	2.76387	2.63908	3.57128	4.48574	2.79281
SOCS2	ENSG00000120833.9	90	2.11577e-09	4.83688e-08	5.65089	5.82268	6.0645	5.63234	6.07767	5.48791
ARID5B	ENSG00000150347.10	91	5.01507e-13	3.18783e-11	-4.92216	-3.68806	-1.48003	-3.64151	-2.72333	-4.67026
IWS1	ENSG00000163166.9	91	8.12081e-13	4.91126e-11	2.13188	1.17688	4.01653	1.59434	2.47795	2.4822
NDUFS7	ENSG00000115286.15	92	8.13466e-13	4.91126e-11	1.79602	2.4154	4.58526	2.8096	1.98118	3.57327
SARS	ENSG00000031698.8	93	8.33632e-13	4.97538e-11	4.0398	2.84271	4.53038	3.60998	2.98184	3.05559
TP53INP1	ENSG00000164938.9	93	2.40607e-10	7.00685e-09	1.45207	1.97217	3.64039	2.0233	4.05258	1.19894
IDH3A	ENSG00000166411.9	98	2.77742e-10	7.98354e-09	1.43635	3.59298	4.75579	4.09219	4.82464	2.99416
MRPS33	ENSG00000090263.11	99	4.24372e-12	2.07078e-10	2.08026	3.20003	3.61783	4.4063	3.1716	1.62051
STAU2	ENSG00000040341.13	100	1.48081e-12	8.42015e-11	2.69744	3.69941	4.87384	2.40368	3.82638	1.62462
MDH2	ENSG00000146701.7	103	1.80164e-12	9.78201e-11	1.84939	2.06149	4.55367	1.9332	2.89245	2.24524
SH3BP4	ENSG00000130147.11	103	1.65964e-11	6.97629e-10	3.93747	1.90486	3.10395	2.42367	3.51053	2.46528
VDAC1	ENSG00000213585.6	105	2.14847e-12	1.15054e-10	1.78881	1.91147	3.96956	3.30521	2.91823	1.18505
GDAP1	ENSG00000104381.8	105	3.81308e-09	8.04657e-08	4.67374	4.22168	3.39661	4.56451	3.99257	4.32215
DERL1	ENSG00000136986.5	106	2.23893e-12	1.19488e-10	1.95934	1.64039	4.13659	1.79173	1.83514	1.00195
PSMD6	ENSG00000163636.6	106	3.3981e-10	9.48859e-09	1.99136	3.5211	3.67648	2.58482	3.78807	3.09823
AAMP	ENSG00000127837.5	107	1.51553e-11	6.44011e-10	2.98146	3.3795	3.98595	2.48859	3.73111	3.00838
SMDT1	ENSG00000183172.8	108	2.38511e-12	1.26e-10	3.30502	2.76592	3.04538	3.24391	2.39315	2.68849
TTC37	ENSG00000198677.6	108	6.45108e-10	1.69824e-08	3.04815	2.26307	2.33243	3.00092	3.60798	1.21163
FKBP1A	ENSG00000088832.10	109	2.68719e-12	1.40065e-10	1.16118	2.02298	3.96322	1.38789	2.97967	2.15242
GNB2L1	ENSG00000204628.7	110	7.71569e-12	3.59078e-10	1.44399	1.3988	2.76446	3.1347	1.76475	1.40542
ARHGEF12	ENSG00000196914.4	110	8.32705e-10	2.14514e-08	2.65003	2.64429	3.37134	3.11058	3.46502	1.35204
STEAP2	ENSG00000157214.9	110	2.46607e-08	4.10234e-07	4.58108	4.17902	3.1417	4.86746	3.95755	5.08496
RHOA	ENSG00000067560.6	111	2.49883e-12	1.30683e-10	2.28873	1.56882	2.67328	2.04625	2.41654	1.63771
YARS	ENSG00000134684.6	112	2.89188e-12	1.48751e-10	4.40117	1.92969	3.73543	3.11436	3.18171	3.83946
STEAP1	ENSG00000164647.4	112	3.78739e-08	5.95211e-07	5.42581	4.69947	4.52045	4.99561	4.60083	5.85248
RNASEK	ENSG00000219200.6	113	4.1584e-11	1.51573e-09	1.80141	3.23696	3.15523	2.71722	2.36345	1.71789
TMEM106C	ENSG00000134291.7	116	4.25095e-12	2.07078e-10	2.04235	3.93208	5.2519	4.52463	4.26747	1.31659
NTMT1	ENSG00000148335.10	117	4.31089e-12	2.09346e-10	1.84911	3.31956	4.5871	3.57149	3.28567	2.22973
C6orf211	ENSG00000146476.6	117	1.13973e-09	2.8066e-08	1.18764	3.497	4.76878	1.14067	5.27966	3.01189
ACSL1	ENSG00000151726.9	118	3.16857e-08	5.09086e-07	3.09003	1.11017	4.86443	4.05193	2.63987	4.85372
ACN9	ENSG00000196636.7	120	3.0643e-11	1.17227e-09	2.15583	3.69533	4.81107	4.27197	3.36865	4.12502
FLNB	ENSG00000136068.10	126	7.61288e-12	3.55351e-10	3.51604	3.13678	1.51074	2.73155	2.2822	2.41836
EGR1	ENSG00000120738.7	126	1.1679e-08	2.13846e-07	-2.02898	-6.32278	-5.99952	-4.66601	-4.11906	-6.10076
SHISA5	ENSG00000164054.11	128	1.21868e-10	3.95362e-09	2.29537	3.31192	1.31061	2.94954	2.8017	3.28904
PAIP2	ENSG00000120727.8	128	2.08649e-09	4.77693e-08	1.51996	2.32182	3.35167	2.40372	4.00656	1.77077
CLDN7	ENSG00000181885.14	129	8.63283e-12	3.97034e-10	4.10376	2.90198	4.92441	3.48361	3.85898	3.71289
PDCD6IP	ENSG00000170248.9	129	2.21877e-09	5.05068e-08	2.69194	1.19745	2.67404	2.76908	3.65488	3.41912
CMC1	ENSG00000187118.8	130	2.37516e-09	5.35164e-08	2.31322	1.8646	2.16181	3.23922	3.92824	1.4302
C11orf73	ENSG00000149196.11	131	9.46024e-12	4.33812e-10	1.79104	2.13644	4.25373	1.73103	3.02365	3.1959
CHDH	ENSG00000016391.6	131	3.33614e-09	7.17569e-08	2.99207	3.06228	2.55521	3.36962	2.83476	3.02958
RSL24D1	ENSG00000137876.5	133	1.10542e-11	4.93868e-10	1.53176	1.27573	3.81826	3.32714	3.30028	1.9331
GHITM	ENSG00000165678.15	134	1.17686e-11	5.16928e-10	1.68041	1.61371	4.27446	2.91073	3.17059	1.61924
KIAA0247	ENSG00000100647.7	134	3.07577e-11	1.17307e-09	1.72441	1.73388	1.70704	3.32551	3.07955	2.23525
MRPS25	ENSG00000131368.3	134	1.95196e-10	5.84727e-09	1.68886	2.5112	4.04724	3.04104	3.69831	2.75913
ENO1	ENSG00000074800.9	136	1.35205e-11	5.84666e-10	2.09891	1.89509	3.91558	1.87781	3.22965	1.37635
SOGA2	ENSG00000168502.13	138	1.29982e-09	3.11845e-08	3.99367	4.11012	3.27094	4.25488	4.04414	2.79149
HIST1H2BK	ENSG00000197903.6	139	1.59849e-11	6.75556e-10	3.88951	1.36266	2.0512	3.7493	2.96831	-2.02318
PSAT1	ENSG00000135069.9	139	5.88593e-08	8.73228e-07	5.40985	4.90842	5.71059	4.10608	4.09621	5.68016
PRSS23	ENSG00000150687.7	141	8.81412e-08	1.25411e-06	5.51852	4.81831	3.27163	5.12768	5.21821	5.72984
HIGD1A	ENSG00000181061.9	142	3.22121e-09	6.96682e-08	1.17233	1.48934	3.49218	1.28788	3.52373	2.77848
PPIC	ENSG00000168938.5	142	1.30501e-07	1.74713e-06	3.80469	2.90296	1.78156	3.25013	2.10561	4.66861
XPOT	ENSG00000184575.7	143	5.71706e-11	2.02716e-09	2.25012	2.75825	4.30188	2.91086	3.65795	2.57665
RPS9	ENSG00000170889.9	144	2.17683e-11	8.82746e-10	2.88671	2.44428	2.85802	3.06086	2.03081	1.57142
DDAH1	ENSG00000153904.14	144	1.4204e-07	1.88547e-06	-1.43693	1.65529	4.61457	2.44432	2.69906	5.02562
GTF3A	ENSG00000122034.8	146	2.8981e-10	8.29994e-09	2.49548	4.14731	3.04446	2.66693	2.75711	1.94422
PDAP1	ENSG00000106244.8	146	4.09229e-09	8.58941e-08	1.68008	1.83556	2.15364	1.28126	2.60267	2.41711
PRKAG2	ENSG00000106617.9	148	1.57558e-07	2.06862e-06	1.51484	1.18677	2.53782	2.30399	2.35502	3.71182
NOP16	ENSG00000048162.15	149	5.96788e-11	2.09237e-09	1.79084	1.96166	2.80323	3.96767	3.14816	2.30037
FYCO1	ENSG00000163820.10	149	4.56587e-09	9.40666e-08	2.3183	2.64604	2.9146	3.70995	3.65299	3.64351
FAH	ENSG00000103876.7	153	4.95369e-09	1.0086e-07	3.26974	2.5378	3.74864	4.34297	4.71732	3.38381
CAMLG	ENSG00000164615.3	155	3.636e-11	1.35372e-09	4.68373	3.61239	3.35051	3.61059	3.55516	2.27261
SNX2	ENSG00000205302.2	155	4.82209e-11	1.7374e-09	3.6428	2.37459	4.49474	2.66222	2.79959	1.68216
CPB1	ENSG00000153002.7	155	7.3774e-08	1.06421e-06	6.1799	8.38	2.24691	8.31552	8.10393	8.24774
SBDS	ENSG00000126524.5	156	3.7959e-11	1.39992e-09	2.90031	1.60913	3.62161	2.27409	3.25275	1.79364
MFSD3	ENSG00000167700.4	156	2.12122e-07	2.6989e-06	2.58645	2.64388	2.4733	2.64194	2.64486	2.97804
GYG1	ENSG00000163754.13	158	1.72379e-10	5.3061e-09	2.7782	2.9925	4.58712	4.32628	3.24095	4.23852
GDF15	ENSG00000130513.6	161	3.24188e-09	7.00184e-08	6.29043	4.18732	5.23399	5.12221	5.87967	5.04537
LIMCH1	ENSG00000064042.13	161	2.06563e-07	2.63245e-06	-3.40194	1.85776	3.88366	1.08147	1.7015	4.10176
ATP6V1A	ENSG00000114573.5	162	6.59614e-11	2.30232e-09	1.39402	1.71684	3.84554	2.2879	2.38112	1.98844
FAM47E	ENSG00000272414.1	162	1.47419e-07	1.9453e-06	4.51563	4.7355	4.86469	4.39817	4.60358	4.93316
TARS	ENSG00000113407.9	163	4.02859e-09	8.47848e-08	2.46245	2.74635	4.00757	1.72144	3.99413	2.99103
RRAGD	ENSG00000025039.10	165	1.40498e-07	1.86816e-06	4.14067	2.46269	4.34337	2.09113	2.70195	4.26607
CGA	ENSG00000135346.4	168	1.58431e-08	2.77734e-07	8.02749	8.25058	6.1316	8.25058	7.63731	7.08738
PYURF	ENSG00000145337.4	169	9.32204e-11	3.12139e-09	2.40955	3.39579	4.92479	3.1458	2.45066	3.67512
LACC1	ENSG00000179630.6	169	4.4723e-07	5.21502e-06	3.98115	4.08409	3.92216	3.69095	3.72649	4.40776
TAX1BP3	ENSG00000213977.3	170	2.47929e-09	5.56223e-08	3.55656	2.46771	4.6556	2.98964	2.74817	3.77816
C8orf59	ENSG00000176731.7	172	9.81051e-11	3.26398e-09	1.11942	1.3429	3.65546	2.35646	2.15997	1.25454
FOS	ENSG00000170345.5	172	4.21459e-09	8.79887e-08	-4.42612	-7.43563	-6.18999	-1.54111	-5.26093	-6.09774
SERF1B	ENSG00000205572.5	172	5.3256e-09	1.07039e-07	1.35729	3.85695	2.62381	3.64069	3.94011	1.22469
RRM2B	ENSG00000048392.7	173	1.00742e-10	3.33752e-09	3.993	3.45054	4.40339	3.45118	3.13878	1.13856
SDC2	ENSG00000169439.7	174	1.7403e-07	2.26398e-06	5.51791	4.93198	3.27638	5.49633	3.49209	5.39351
NDUFAF2	ENSG00000164182.6	179	1.47238e-10	4.6232e-09	3.68857	3.32062	3.43572	2.17567	2.89702	1.59856
SAT1	ENSG00000130066.12	179	5.82054e-08	8.65168e-07	-5.17419	-5.62738	-3.85684	-4.90238	-4.17788	-4.96149
LAMA3	ENSG00000053747.11	182	1.07535e-08	1.9947e-07	5.29536	3.1989	4.77379	4.96164	4.93068	4.35213
TMX2	ENSG00000213593.5	183	3.64109e-10	1.00771e-08	2.25432	2.37363	1.87785	4.97888	3.39075	2.4574
DIAPH1	ENSG00000131504.11	185	1.81055e-10	5.53949e-09	3.29555	1.55465	2.45872	1.97841	1.84808	1.39616
PALLD	ENSG00000129116.13	186	1.81379e-10	5.53949e-09	5.81664	3.83029	5.09745	1.17359	2.36826	3.29989
2019-09-11	ENSG00000138758.7	187	1.54939e-10	4.80709e-09	1.22351	3.07612	4.49915	1.45102	2.09765	3.72809
ARF4	ENSG00000168374.6	187	1.84233e-10	5.60476e-09	2.3497	1.61902	1.78499	1.16003	1.9674	1.40664
AKR7A3	ENSG00000162482.4	187	5.54284e-09	1.1112e-07	4.28061	4.46618	4.69017	4.18414	4.69017	2.00664
TKT	ENSG00000163931.11	188	1.92936e-10	5.82421e-09	4.15612	3.19752	3.81371	2.17403	2.65614	3.13917
TMA16	ENSG00000198498.5	188	7.26204e-07	8.03088e-06	2.63104	2.71121	2.72506	2.71518	1.57606	3.22265
NDUFS4	ENSG00000164258.7	189	1.93902e-10	5.83085e-09	3.35155	3.34355	2.37345	3.56506	2.62363	2.01166
DCAF13	ENSG00000164934.9	191	1.34665e-09	3.21489e-08	1.43702	3.8961	3.59681	2.85894	2.63319	1.14028
TUFM	ENSG00000178952.4	192	1.82064e-10	5.54959e-09	2.21005	1.80245	3.7429	3.21456	2.57736	1.29628
ATP1B3	ENSG00000069849.6	192	1.84503e-08	3.18441e-07	3.08976	1.80463	4.34271	4.01446	4.33509	2.06731
ETFB	ENSG00000105379.5	193	1.89811e-10	5.76326e-09	1.70918	2.36827	5.17263	1.23904	2.53151	1.10074
ACOT9	ENSG00000123130.12	193	1.52456e-09	3.60658e-08	-2.0991	-3.29591	-1.03658	-2.16065	-2.24222	-1.38223
AIMP2	ENSG00000106305.5	194	1.92495e-10	5.82213e-09	3.01278	3.90234	5.30961	4.44523	3.65146	3.09805
SLC1A5	ENSG00000105281.8	195	1.94397e-10	5.83452e-09	2.04507	3.5426	4.53967	2.19007	3.04318	1.80064
PCCB	ENSG00000114054.9	195	2.15648e-08	3.66531e-07	1.72172	1.28613	3.5939	3.82798	4.28831	1.8952
CRIP2	ENSG00000182809.6	195	8.11301e-07	8.78554e-06	-3.57698	-3.97584	-1.3808	-3.12454	-1.63394	-5.02966
ZBTB38	ENSG00000177311.6	196	1.89557e-08	3.26803e-07	2.9712	3.85244	3.17993	3.13263	3.97946	2.29939
PLCXD2	ENSG00000240891.2	196	1.92316e-07	2.47306e-06	3.36912	3.03442	3.24193	3.25257	3.41805	3.26304
COPS6	ENSG00000168090.5	197	1.52596e-10	4.74381e-09	2.48429	1.65267	4.27381	2.88579	2.43226	2.72813
C5orf28	ENSG00000151881.10	197	3.13045e-10	8.81998e-09	2.12235	4.16115	4.54803	2.92542	2.96455	3.23707
SLC7A1	ENSG00000139514.8	199	8.75423e-07	9.38244e-06	2.38733	2.1153	2.27508	1.77898	1.89513	2.87162
MYO1C	ENSG00000197879.10	201	6.624e-10	1.73791e-08	1.3455	1.88899	3.31515	1.65971	2.85662	2.38901
TMEM144	ENSG00000164124.6	201	3.17133e-08	5.09086e-07	4.06458	3.00806	3.43795	3.0884	3.86696	3.93223
RNF141	ENSG00000110315.2	203	1.589e-09	3.7477e-08	1.11306	2.36161	4.07573	3.62009	2.53451	3.49119
ZNF626	ENSG00000188171.10	204	1.14833e-08	2.1051e-07	1.60855	4.02792	4.65474	3.88268	4.21101	2.3814
SLC35F2	ENSG00000110660.10	204	5.2015e-07	5.95867e-06	-1.45374	3.58762	4.44757	3.31616	3.60313	4.39909
MRPS7	ENSG00000125445.6	205	2.8021e-10	8.03971e-09	2.13906	2.45009	3.85668	2.22611	2.4124	2.24654
MIEN1	ENSG00000141741.7	205	4.88651e-10	1.32888e-08	-4.51225	2.36674	2.69761	-2.19881	1.98707	-2.23231
CHCHD4	ENSG00000163528.8	205	3.80116e-09	8.04313e-08	3.44405	3.75432	4.88865	4.65301	4.49365	4.09939
NDUFA10	ENSG00000130414.7	208	5.88626e-10	1.56803e-08	3.34918	2.28242	4.03106	2.79935	2.85052	1.59161
GPATCH4	ENSG00000160818.12	209	6.29075e-10	1.66163e-08	3.78771	1.67797	3.75995	2.96187	2.56691	2.46604
MXI1	ENSG00000119950.16	210	6.56414e-10	1.7251e-08	3.68204	1.78386	3.71305	1.48569	3.34882	2.24907
EIF4EBP3	ENSG00000243056.1	210	9.42766e-10	2.38159e-08	3.45202	4.44517	3.70031	4.81301	2.79649	2.28212
TNFSF10	ENSG00000121858.6	211	6.78514e-10	1.77423e-08	-6.7243	-4.94913	-1.49472	-1.15785	-1.19475	-2.87402
REXO2	ENSG00000076043.5	212	3.08866e-10	8.7337e-09	1.76618	1.93419	4.29724	3.69858	3.27882	3.63274
RAB3D	ENSG00000105514.3	212	3.2532e-08	5.20678e-07	-1.70786	1.67875	3.40933	1.2877	3.62871	1.11039
PDHB	ENSG00000168291.8	214	3.25388e-10	9.13483e-09	3.05098	2.99265	4.65219	2.59934	3.89894	1.46557
NIPAL3	ENSG00000001461.12	214	3.5039e-10	9.74712e-09	4.15821	3.71741	4.4746	4.26338	3.04119	3.47213
DUSP14	ENSG00000161326.8	214	8.01954e-10	2.07279e-08	3.91797	3.4472	4.39364	4.12405	3.93905	3.56371
SUN1	ENSG00000164828.13	214	8.49092e-10	2.18017e-08	3.28091	1.6567	3.05351	3.09175	2.36804	3.17361
C9orf78	ENSG00000136819.10	215	3.49143e-10	9.7318e-09	1.4462	3.1904	4.52278	3.17679	3.41734	1.76452
TMSB10	ENSG00000034510.4	216	3.32929e-07	4.01079e-06	-3.79181	-3.69292	-2.03571	-3.04631	-2.94046	-3.45542
EI24	ENSG00000149547.10	217	3.89124e-10	1.07504e-08	1.35658	1.60984	4.40869	3.78031	2.88431	2.0076
PSMA2	ENSG00000106588.6	217	8.71588e-10	2.22696e-08	1.53246	1.78115	3.49296	2.84299	3.10752	2.04301
USP2	ENSG00000036672.11	220	1.22718e-07	1.65141e-06	2.55803	1.99553	1.44905	3.17886	2.18762	2.87074
POLD2	ENSG00000106628.6	222	2.21288e-08	3.73681e-07	2.50612	2.70833	3.44581	2.85963	3.07616	2.62238
GPRIN3	ENSG00000185477.4	223	3.90795e-08	6.10476e-07	3.53956	3.09724	3.14858	3.31816	3.43838	2.88087
KPNA1	ENSG00000114030.8	224	4.65491e-08	7.08751e-07	1.44737	1.22186	2.811	1.58375	3.15617	1.66565
EIF3M	ENSG00000149100.8	225	5.36116e-10	1.44042e-08	1.58167	1.86486	3.80985	2.65283	2.56408	1.92742
FZD6	ENSG00000164930.7	225	1.89427e-06	1.85361e-05	2.3336	2.81994	2.02381	1.4458	1.97341	3.60752
SEC22C	ENSG00000093183.9	226	4.7822e-08	7.24605e-07	1.72832	2.67121	3.94024	3.2389	4.1839	2.81625
ZNF587	ENSG00000198466.8	230	5.08942e-08	7.68179e-07	1.44283	1.21325	2.29272	2.75861	3.43181	1.8367
CEBPG	ENSG00000153879.4	233	2.25855e-06	2.17068e-05	3.64284	2.36005	3.15812	2.55146	2.77406	3.88897
CYFIP2	ENSG00000055163.14	237	3.07022e-08	4.94939e-07	4.18834	3.19397	3.70883	3.93493	4.06033	2.8288
NAE1	ENSG00000159593.10	241	9.50233e-10	2.39658e-08	1.17017	2.44575	4.23394	1.3556	3.42154	1.66209
ATP5H	ENSG00000167863.7	241	2.07813e-09	4.76478e-08	2.06121	1.6971	1.62409	2.42819	1.64172	1.05106
DCTN4	ENSG00000132912.8	241	6.49654e-08	9.53862e-07	3.25477	2.11633	2.50456	2.69184	3.54147	1.71918
RNF7	ENSG00000114125.9	242	3.12233e-09	6.77169e-08	2.38752	1.06959	3.71381	3.31037	3.19983	3.23564
JAGN1	ENSG00000171135.10	244	3.41414e-09	7.32332e-08	3.40747	3.01231	3.93363	3.88465	3.53483	3.23359
TMEM167A	ENSG00000174695.5	247	2.52918e-09	5.64572e-08	2.98745	1.76286	3.2951	3.32708	2.86255	1.39901
CACNB2	ENSG00000165995.14	247	6.7971e-08	9.8963e-07	4.15392	3.25694	4.03128	3.61189	4.53428	4.0226
DIMT1	ENSG00000086189.5	248	3.45283e-08	5.49257e-07	2.38641	3.13928	3.07353	1.66351	3.12579	2.44573
KIAA1147	ENSG00000257093.2	249	8.87624e-07	9.50019e-06	2.00906	2.29607	2.84484	2.18804	2.08324	2.89478
DSCR3	ENSG00000157538.9	250	1.15032e-09	2.82822e-08	2.9361	1.99777	4.32049	3.52775	3.63312	2.24569
EMG1	ENSG00000126749.10	251	1.20045e-09	2.93303e-08	2.93477	1.73115	3.56577	1.31549	1.43901	2.21582
ACADM	ENSG00000117054.9	252	1.21004e-09	2.94725e-08	1.98941	1.33716	4.51781	3.1288	3.27523	3.31981
MRPL22	ENSG00000082515.12	252	2.24453e-09	5.09231e-08	2.78987	2.91952	3.67924	3.50537	3.31877	2.00388
EIF3K	ENSG00000178982.5	252	2.97737e-09	6.5024e-08	2.27	2.48745	1.58502	3.54798	1.38962	1.07594
MPP6	ENSG00000105926.11	252	1.02176e-06	1.07809e-05	3.05081	1.86523	3.61839	3.59127	1.56041	3.43114
C19orf48	ENSG00000167747.9	253	1.21554e-09	2.95232e-08	2.32328	1.06235	5.10794	2.88274	3.26711	1.06154
RALA	ENSG00000006451.3	255	1.25569e-09	3.03013e-08	2.26397	1.91384	4.04457	2.48546	2.12783	2.44913
EXOSC4	ENSG00000178896.6	256	1.36687e-09	3.25603e-08	1.48218	4.28048	4.84865	3.8149	2.65374	3.14994
IL20RA	ENSG00000016402.8	256	2.29645e-06	2.19765e-05	1.88384	3.06328	2.77529	2.54667	3.50714	3.61274
NUPL2	ENSG00000136243.12	257	9.5349e-09	1.78346e-07	2.36727	4.08308	3.69012	3.74774	2.01977	2.06981
SAMD4A	ENSG00000020577.9	257	1.78653e-06	1.76141e-05	2.93317	2.16905	2.72415	2.30555	1.96532	2.90963
KIAA0368	ENSG00000136813.10	259	1.59347e-09	3.75257e-08	1.33262	1.3692	3.25725	2.18836	2.34242	1.49917
FAM115A	ENSG00000198420.5	259	5.02093e-09	1.01964e-07	1.75112	2.14405	3.52646	1.79422	2.54083	2.95746
MKKS	ENSG00000125863.13	260	9.45554e-08	1.32607e-06	1.84089	1.72533	2.13272	1.57727	2.85817	1.55887
MAPKAPK3	ENSG00000114738.6	261	1.08992e-06	1.14077e-05	3.52857	2.94674	3.20675	2.84467	3.45522	3.36592
RCHY1	ENSG00000163743.9	263	1.75563e-09	4.07917e-08	2.21356	3.21318	4.95581	3.03437	3.91785	3.3761
RWDD2B	ENSG00000156253.2	263	2.15559e-09	4.92072e-08	3.81553	3.19017	5.10151	5.01012	3.47795	1.11303
ARIH2	ENSG00000177479.15	264	1.70866e-08	2.95883e-07	4.1349	3.53803	3.18264	3.04606	3.96988	3.18211
PRKAR2A	ENSG00000114302.11	264	4.24938e-06	3.70353e-05	1.78464	1.48858	2.50122	1.17437	2.03687	2.65842
SLC7A2	ENSG00000003989.12	267	3.09838e-08	4.9845e-07	4.08324	4.09794	1.61169	4.23073	4.05206	2.82471
SLC35F6	ENSG00000213699.4	268	5.03095e-09	1.02035e-07	4.129	3.46527	3.42324	2.70069	3.3508	2.66384
OLA1	ENSG00000138430.11	270	2.21898e-09	5.05068e-08	1.35481	1.17242	4.14838	1.00141	2.75784	-1.55346
CISD3	ENSG00000230055.2	277	2.83975e-09	6.23667e-08	-3.73292	2.38189	3.97207	3.95296	3.07632	3.02478
2019-09-10	ENSG00000186522.10	277	2.69063e-08	4.42878e-07	1.97403	2.94861	4.59959	3.20695	4.25577	2.20071
MRPS23	ENSG00000181610.8	278	2.64147e-09	5.85052e-08	2.72934	3.25451	4.22599	2.2387	2.23359	3.04841
KIAA1143	ENSG00000163807.4	281	1.51286e-07	1.99129e-06	1.69862	1.44778	2.58292	1.81666	2.83517	2.56172
THUMPD3	ENSG00000134077.11	284	3.00366e-09	6.53271e-08	1.6718	1.33831	3.67475	1.72227	1.83142	3.51992
JPH1	ENSG00000104369.4	284	3.46871e-06	3.10832e-05	3.47716	3.12987	3.67832	3.71788	3.15551	3.84761
HIGD2A	ENSG00000146066.2	285	3.00379e-09	6.53271e-08	1.45253	1.88536	4.29688	3.58618	3.19085	1.7371
PYROXD1	ENSG00000121350.11	285	2.71437e-06	2.52196e-05	2.72564	2.24645	3.64431	1.98326	2.85945	3.68644
SMPDL3A	ENSG00000172594.8	286	2.99866e-06	2.74211e-05	3.31799	2.96202	4.41592	2.78022	3.96135	4.38354
TMEM64	ENSG00000180694.9	287	1.68825e-06	1.67614e-05	2.51951	2.62321	3.50142	2.9908	2.83621	3.27862
LSM4	ENSG00000130520.6	288	1.45412e-07	1.92207e-06	2.02448	2.07755	3.4952	2.91373	3.58452	2.26864
CCZ1	ENSG00000122674.8	290	7.10339e-09	1.36793e-07	1.87375	1.77469	3.15646	3.36904	2.2832	1.90654
LAPTM4B	ENSG00000104341.12	290	2.18092e-08	3.6948e-07	3.84947	5.20516	3.07833	3.09209	3.14853	3.26978
HLA-B	ENSG00000234745.5	291	7.27263e-09	1.3988e-07	3.52606	-2.48426	-3.83187	-4.75723	-1.74728	-2.00424
CLTB	ENSG00000175416.8	292	7.45771e-09	1.43087e-07	3.25999	2.30795	3.05162	3.52064	2.7096	2.74652
ZNF91	ENSG00000167232.9	292	1.92027e-07	2.47138e-06	1.15734	1.10566	1.56983	1.44438	4.07758	2.42946
AK1	ENSG00000106992.13	293	8.05243e-09	1.53182e-07	3.62376	4.62121	4.86816	3.83702	4.06886	2.79801
HARS	ENSG00000170445.8	296	4.26345e-09	8.86538e-08	4.14386	3.4751	4.98066	3.24685	3.8595	2.58053
ARL4A	ENSG00000122644.8	296	2.28809e-08	3.84719e-07	3.72678	2.25388	5.10973	3.01373	2.78439	4.28873
EXOSC5	ENSG00000077348.4	298	4.43986e-09	9.18335e-08	2.01413	3.8337	4.2425	3.1657	2.58323	1.89116
FAM162A	ENSG00000114023.11	299	4.13433e-09	8.65442e-08	1.63739	1.0248	3.61632	3.46191	3.09906	2.39857
KIF9	ENSG00000088727.8	300	3.91976e-08	6.1171e-07	1.28696	3.00515	3.36033	4.05509	3.86649	3.58731
EEF1A2	ENSG00000101210.6	301	1.70951e-06	1.69402e-05	2.51204	2.51204	2.3255	2.42024	2.51204	2.49815
MRPS2	ENSG00000122140.6	305	1.50708e-07	1.98536e-06	1.18339	2.2275	3.18399	2.3761	2.49021	2.97251
MAP4	ENSG00000047849.17	306	1.36111e-08	2.44639e-07	3.02329	1.13352	3.07854	1.66131	2.3888	2.67487
GTPBP10	ENSG00000105793.11	306	2.34466e-08	3.92123e-07	2.73076	2.73702	4.11214	3.64601	3.47563	3.63639
PPM1K	ENSG00000163644.10	310	8.94935e-09	1.67996e-07	3.49828	3.50535	4.67532	3.4915	3.30084	3.60104
MRPS24	ENSG00000062582.9	310	1.19748e-08	2.18751e-07	2.35525	2.21028	3.33284	3.42821	2.43795	2.20078
ZNF532	ENSG00000074657.9	310	2.8425e-07	3.49985e-06	-1.74182	-1.77258	-1.09988	-1.52207	-2.38296	-2.60412
PFKM	ENSG00000152556.11	311	4.5331e-08	6.90879e-07	2.46743	3.93279	3.96399	3.61183	3.67132	3.1639
PLS3	ENSG00000102024.13	312	7.97072e-06	6.44791e-05	3.4973	3.75703	3.03648	3.29615	1.46412	4.05186
GABARAP	ENSG00000170296.5	313	7.86263e-09	1.50303e-07	1.62403	1.09396	3.50532	2.00738	1.36699	1.07879
TNFRSF12A	ENSG00000006327.9	314	1.67291e-08	2.90658e-07	4.40433	1.80091	3.42033	1.43707	2.23307	2.24158
CDYL2	ENSG00000166446.10	314	2.38897e-07	3.0005e-06	2.6998	3.67307	3.18665	2.00905	3.904	2.37189
ARL6IP1	ENSG00000170540.10	321	9.53104e-06	7.53854e-05	-1.56558	-1.82845	-1.38465	-1.86431	-1.32277	-3.13958
ANKRD46	ENSG00000186106.7	323	9.08587e-08	1.28434e-06	2.61912	4.31576	4.64605	3.3836	4.35408	3.13224
TMEM192	ENSG00000170088.9	323	3.31678e-06	2.98931e-05	2.16931	2.0292	3.2765	1.99947	2.69629	3.06039
ASNA1	ENSG00000198356.7	325	6.88041e-09	1.33485e-07	1.14348	2.27804	3.63437	3.34307	2.96796	2.57916
TUBE1	ENSG00000074935.9	331	1.10599e-06	1.15449e-05	2.8852	3.71559	3.79061	3.09	3.50433	3.65044
PBX1	ENSG00000185630.14	333	2.75343e-08	4.51314e-07	-4.6774	-2.91314	-1.36747	-3.07914	-2.21066	-3.3578
RAB17	ENSG00000124839.8	334	3.67215e-07	4.3733e-06	2.6226	2.87769	3.09927	2.41352	3.20973	1.47567
PUS7	ENSG00000091127.9	335	8.76046e-09	1.65244e-07	2.23894	2.98609	3.87168	3.56787	3.20306	2.61322
C8orf33	ENSG00000182307.8	337	8.03368e-09	1.53012e-07	1.3523	3.54936	4.19974	1.35061	1.85592	1.00561
SLC27A5	ENSG00000083807.5	340	1.29651e-08	2.35465e-07	4.65602	4.68845	5.03582	5.0829	4.20206	3.13194
CD320	ENSG00000167775.6	342	8.188e-08	1.17034e-06	3.47806	4.14493	4.80946	3.12479	4.19991	3.81644
MT1A	ENSG00000205362.6	342	1.1676e-07	1.58901e-06	5.2107	5.18886	4.79026	5.2107	5.06743	2.19666
SLC25A26	ENSG00000144741.13	344	8.11289e-07	8.78554e-06	3.26344	2.66617	2.68778	2.99464	3.47316	3.20142
RAD23A	ENSG00000179262.5	345	8.93566e-09	1.67941e-07	1.10813	1.74663	3.02253	2.16394	2.19015	1.16261
ZSWIM8	ENSG00000214655.6	346	2.85646e-08	4.64792e-07	-2.33842	-2.85727	-1.08013	-3.41372	-1.67286	-3.16965
ING3	ENSG00000071243.11	346	1.08048e-07	1.48336e-06	2.4811	2.7359	4.60114	3.56001	4.30937	3.85857
SLC25A39	ENSG00000013306.11	352	4.39615e-08	6.72628e-07	2.15953	3.65014	3.26971	3.86135	2.76236	3.24059
FAHD1	ENSG00000180185.7	353	1.11485e-08	2.06062e-07	2.73702	2.63462	3.69762	1.10592	2.16635	1.71251
COBLL1	ENSG00000082438.11	355	4.32467e-07	5.06553e-06	3.27137	3.26058	4.33117	3.26152	3.39308	3.61125
MED11	ENSG00000161920.5	356	1.34418e-07	1.79649e-06	2.38747	3.35781	4.52157	2.60747	4.03986	1.73882
CASC3	ENSG00000108349.10	357	5.30108e-08	7.99354e-07	-4.359	1.66014	2.59839	-2.46361	1.24288	-1.03031
ZSWIM7	ENSG00000214941.3	358	3.49995e-07	4.19314e-06	2.70334	3.75597	4.37665	3.81377	3.43673	3.82311
ANKH	ENSG00000154122.8	360	2.49319e-08	4.13865e-07	4.15293	2.94942	4.33057	3.75954	3.36669	3.33198
VTI1B	ENSG00000100568.6	360	3.20199e-07	3.88436e-06	3.13021	3.072	3.18852	2.73432	3.34024	1.90392
ID3	ENSG00000117318.8	362	6.25526e-08	9.21899e-07	1.59322	2.33602	5.05985	4.16507	4.54638	4.07637
F12	ENSG00000131187.5	363	1.08366e-06	1.1365e-05	2.28373	3.00197	2.73014	3.06263	2.10039	2.60335
SPAG7	ENSG00000091640.3	365	1.39519e-08	2.49048e-07	2.46461	3.24729	4.78381	1.89345	3.05429	2.14103
HACL1	ENSG00000131373.10	366	1.52842e-07	2.01009e-06	2.24485	3.34998	4.06536	3.34105	3.49061	3.68917
SDHAF2	ENSG00000167985.2	368	1.42657e-08	2.53492e-07	1.19678	1.50364	4.10311	1.44676	3.45096	2.21606
EGLN2	ENSG00000269858.1	370	1.06474e-07	1.4682e-06	4.33779	3.33556	3.83077	3.4653	3.94154	2.7134
LXN	ENSG00000079257.3	370	7.93704e-08	1.13655e-06	7.22453	7.19944	6.74471	6.90241	6.28289	3.52631
PSMG3	ENSG00000157778.4	373	1.58192e-08	2.77627e-07	1.18265	1.94547	4.70385	3.58409	1.28325	3.23781
STK3	ENSG00000104375.11	373	8.59351e-08	1.22495e-06	1.66834	3.09334	3.32956	3.12399	2.37089	1.7388
CRBN	ENSG00000113851.9	377	1.6402e-08	2.85928e-07	1.8397	2.98654	4.01858	2.8866	3.02268	2.38754
ATP5D	ENSG00000099624.3	378	1.66242e-08	2.89479e-07	2.36668	2.35489	3.85639	3.31335	2.10693	2.48009
COX5A	ENSG00000178741.7	380	1.71944e-07	2.24057e-06	1.55589	1.75983	3.42412	3.09259	3.11003	2.95251
ELL3	ENSG00000128886.7	386	2.23168e-07	2.82336e-06	2.46209	3.42922	4.84461	3.78972	4.34468	2.12039
ABHD10	ENSG00000144827.4	386	2.74117e-06	2.54383e-05	2.77198	2.7384	3.74234	2.96305	2.77203	3.4856
TMEM251	ENSG00000153485.5	387	9.30998e-08	1.30809e-06	3.80505	2.20868	3.3727	2.68283	3.04955	2.22912
UBE2F	ENSG00000184182.14	389	2.12524e-08	3.61627e-07	1.84273	2.87541	4.07767	2.49863	2.78486	1.44607
EBAG9	ENSG00000147654.10	389	3.52074e-08	5.5949e-07	4.11271	4.49322	4.95927	2.82827	4.05756	3.09921
SH3BGRL	ENSG00000131171.8	390	9.48862e-08	1.32713e-06	-4.94979	-1.7249	-2.23463	-1.50397	-2.91622	-5.08717
IFRD2	ENSG00000214706.6	392	9.15984e-08	1.28922e-06	3.84693	3.82844	4.05753	3.5378	3.44662	3.58051
UBL7	ENSG00000138629.11	392	1.01793e-06	1.07477e-05	1.31096	2.55155	2.84153	3.35379	3.99614	3.13234
RTCB	ENSG00000100220.7	393	2.24827e-08	3.78838e-07	3.4834	2.50744	4.12507	1.62876	2.46112	2.98795
SNTB1	ENSG00000172164.9	394	9.10845e-06	7.2446e-05	2.65739	2.62331	3.05448	2.95849	2.16427	2.88319
NQO1	ENSG00000181019.8	395	1.0362e-06	1.09258e-05	1.23319	1.14514	2.4893	1.95192	3.6408	-1.21821
LSMD1	ENSG00000183011.9	396	2.39755e-07	3.00887e-06	1.15388	2.84422	3.10227	2.48061	2.18677	1.77615
CMSS1	ENSG00000184220.6	399	1.496e-06	1.51302e-05	2.46311	2.02839	3.32938	3.31887	3.23196	3.31289
FARSA	ENSG00000179115.6	401	2.3877e-08	3.98469e-07	1.86534	2.63958	3.71771	3.11077	3.00447	1.04467
BCL2L13	ENSG00000099968.13	401	1.17235e-07	1.59271e-06	3.55413	2.28935	3.29313	2.78637	2.89802	1.99029
MFF	ENSG00000168958.15	403	2.40527e-08	4.00545e-07	2.51968	1.99187	4.63971	3.24333	2.63034	3.38387
TXNL4A	ENSG00000141759.10	403	3.40289e-07	4.09631e-06	2.75548	3.44085	3.07373	1.46854	2.38097	1.28544
GULP1	ENSG00000144366.11	403	8.46969e-06	6.81278e-05	4.54247	4.74737	4.79258	4.79258	4.22421	4.79258
GUCD1	ENSG00000138867.12	404	1.20628e-07	1.63172e-06	3.78622	2.14309	3.10698	2.8459	2.85333	1.85948
ELOVL1	ENSG00000066322.8	405	7.34106e-08	1.06093e-06	1.86701	2.79976	3.50076	3.6384	2.62849	2.87923
TRIP6	ENSG00000087077.7	405	1.12476e-07	1.53607e-06	3.30055	1.87678	2.22638	3.09372	1.78452	1.59925
ECHDC1	ENSG00000093144.14	405	1.32889e-07	1.77757e-06	1.10297	4.29513	4.66218	4.15985	2.3478	3.83378
NDUFAF4	ENSG00000123545.5	413	2.75868e-08	4.51702e-07	1.75554	2.57085	4.61181	1.63565	2.4772	2.55946
REPIN1	ENSG00000214022.7	414	2.80369e-08	4.57157e-07	2.35986	2.34057	3.24058	2.74785	2.71529	1.34179
NLRP2	ENSG00000022556.11	414	1.1921e-05	9.14668e-05	2.02559	2.93675	3.02988	3.04105	2.48977	3.04105
ACO2	ENSG00000100412.11	416	1.4519e-07	1.92076e-06	4.02084	2.79449	3.10938	3.62118	2.47637	3.07163
CHAC1	ENSG00000128965.7	416	6.16913e-06	5.1614e-05	4.3012	3.25375	3.94681	2.66359	3.72755	3.87332
CLCN3	ENSG00000109572.9	417	3.05366e-08	4.92915e-07	1.74273	2.49331	3.59832	1.45679	1.91125	2.68122
SFXN4	ENSG00000183605.12	417	4.79765e-07	5.55299e-06	2.71887	3.0932	4.00277	3.97419	3.88185	2.27761
TSPAN12	ENSG00000106025.4	419	2.3254e-05	0.000162332	3.81581	4.28687	3.92859	2.5537	3.9623	4.37578
MTA3	ENSG00000057935.9	420	9.4749e-08	1.3264e-06	-3.2543	-2.27488	-1.01305	-3.7894	-2.02635	-2.93828
ARHGEF37	ENSG00000183111.7	420	2.78619e-07	3.43865e-06	2.71252	2.36197	2.68881	2.63766	2.53337	2.15437
SLC25A23	ENSG00000125648.10	420	1.79844e-05	0.000130195	1.883	1.73383	1.9941	1.40233	1.86777	1.97184
HGD	ENSG00000113924.7	421	1.85465e-05	0.000133954	2.17697	1.01248	3.55541	3.08517	4.40101	4.40985
PAM16	ENSG00000217930.3	422	3.58571e-08	5.6795e-07	1.87593	2.51996	3.86677	3.33627	3.20995	2.60344
ARRB1	ENSG00000137486.12	422	8.95257e-07	9.56878e-06	2.30509	2.8156	3.14779	2.15726	3.18283	2.32069
RAD50	ENSG00000113522.9	424	1.03412e-07	1.4361e-06	2.77937	2.52821	2.9671	3.12429	2.72818	2.03065
C8orf76	ENSG00000189376.7	425	3.85132e-08	6.03903e-07	2.07069	2.39261	3.98739	1.92337	2.74786	1.99659
DNPH1	ENSG00000112667.8	426	9.10542e-08	1.28503e-06	3.83374	3.62575	3.21591	3.88629	2.03629	1.64287
NCBP2	ENSG00000114503.6	427	3.87961e-08	6.07262e-07	1.29929	1.27214	3.53774	1.71569	1.98944	1.26303
PSME2	ENSG00000100911.9	428	1.90839e-07	2.45811e-06	2.1903	1.48089	1.76969	1.10732	1.97297	-1.37801
GGH	ENSG00000137563.7	429	1.99393e-07	2.55148e-06	-2.67564	-1.11839	-1.3513	-2.17636	-1.69753	-2.93989
BCKDHA	ENSG00000248098.6	429	2.92121e-07	3.58548e-06	1.34373	2.69785	3.52593	2.29631	3.21972	1.54289
ARL2	ENSG00000213465.3	433	4.16675e-08	6.42559e-07	2.77665	2.55456	4.18922	1.78933	3.37902	2.80043
MICAL2	ENSG00000133816.9	433	1.3086e-05	9.8805e-05	1.88281	2.74313	2.15142	2.86419	2.97026	2.86904
NUB1	ENSG00000013374.11	434	1.05712e-07	1.46026e-06	2.98037	2.4005	3.38803	1.92184	2.33588	1.02005
SDAD1	ENSG00000198301.7	437	4.39012e-08	6.72363e-07	1.16498	2.42543	3.80957	1.94276	1.90887	2.86969
UCP2	ENSG00000175567.4	437	5.0547e-06	4.33098e-05	-4.73525	-3.61643	2.15343	1.28025	1.64503	-4.13551
PSMA2	ENSG00000256646.3	442	1.55738e-05	0.000114926	2.7629	3.10117	3.33735	3.41683	3.80291	3.63935
HEATR2	ENSG00000164818.11	445	2.2903e-05	0.000160322	1.81376	2.23317	2.90887	1.94436	1.95035	2.92803
PHOSPHO2	ENSG00000144362.7	446	8.49348e-07	9.12174e-06	2.57294	3.83939	4.02273	3.94517	3.86743	3.54577
INTS12	ENSG00000138785.10	447	6.98602e-08	1.0143e-06	1.67855	2.53176	3.93278	2.68587	3.24941	3.46131
IP6K2	ENSG00000068745.10	448	4.88364e-08	7.38545e-07	1.78982	2.10619	3.55193	2.29693	3.13187	2.81422
CPEB2	ENSG00000137449.11	450	2.57279e-06	2.41771e-05	2.89375	2.6306	2.95974	1.33536	3.64631	2.84792
BSCL2	ENSG00000168000.10	451	1.63233e-07	2.13954e-06	1.13779	1.33226	4.06409	4.12931	2.49283	2.21914
CBR4	ENSG00000145439.7	451	7.64376e-07	8.35283e-06	2.07509	3.66625	3.62088	3.01816	3.26545	3.25678
G6PC3	ENSG00000141349.4	460	9.53918e-07	1.01334e-05	2.7005	3.50468	1.76687	3.23409	2.90865	1.17173
SHMT2	ENSG00000182199.6	462	6.54156e-08	9.59572e-07	1.09312	2.80077	4.56943	1.51862	2.48353	1.55639
CLPP	ENSG00000125656.4	463	1.38494e-07	1.84466e-06	1.90939	1.91469	3.68388	2.48942	3.18649	2.98873
PYCR1	ENSG00000183010.12	464	5.25261e-05	0.000328541	2.70567	2.0425	2.97135	1.31502	2.17172	3.43054
LINC00998	ENSG00000214194.4	465	3.42516e-06	3.07282e-05	1.55605	3.02262	3.32945	2.67784	1.60679	3.34624
UBE2D4	ENSG00000078967.8	467	6.97228e-08	1.01325e-06	1.47253	2.77273	3.75484	2.87527	2.2729	1.88676
CLASP2	ENSG00000163539.11	467	3.5305e-06	3.15254e-05	2.01241	1.66333	2.88649	2.05399	3.10146	1.69111
MYH9	ENSG00000100345.16	469	8.42812e-07	9.07648e-06	1.77823	1.48093	2.27131	2.03996	1.63585	1.80728
LAMTOR4	ENSG00000188186.6	477	8.54812e-07	9.17412e-06	1.4084	1.78727	2.89364	2.09663	2.16097	2.6343
YIPF1	ENSG00000058799.9	478	5.78377e-05	0.000357898	1.77402	1.8282	1.11026	1.7131	2.90825	3.38854
ZNF587B	ENSG00000269343.2	479	3.30323e-06	2.97881e-05	2.6882	2.88602	3.14288	2.39518	3.27689	2.19625
ZC3H8	ENSG00000144161.8	482	2.79308e-07	3.44443e-06	1.81475	2.58573	2.81888	3.12043	1.99435	1.97899
LYRM7	ENSG00000186687.11	482	1.97118e-06	1.91806e-05	3.41207	2.95468	3.63944	3.15439	3.51134	2.60907
EEF1E1	ENSG00000124802.7	483	9.13301e-07	9.73503e-06	3.41801	3.67715	3.29694	2.32799	3.40369	1.45075
CAPZA2	ENSG00000198898.8	484	7.46855e-07	8.22473e-06	1.36144	1.61564	3.47121	2.41411	2.93526	1.86368
AKTIP	ENSG00000166971.12	488	7.56182e-07	8.28621e-06	4.11758	4.13785	3.74913	3.04666	2.42101	2.38225
BCAS1	ENSG00000064787.8	488	3.69286e-06	3.27354e-05	2.51012	3.22818	1.8977	2.59985	3.33519	2.40927
EIF3I	ENSG00000084623.7	489	5.82613e-07	6.57785e-06	2.0291	1.6079	1.83576	2.26537	2.50792	1.31454
RAD51C	ENSG00000108384.10	490	1.48021e-06	1.49812e-05	4.03293	4.46516	4.0136	3.70365	3.21306	-1.76562
SLMAP	ENSG00000163681.10	492	6.19218e-07	6.97099e-06	2.87388	1.46205	1.99932	1.04722	2.20437	1.33303
LYRM2	ENSG00000083099.6	493	1.05354e-07	1.45661e-06	1.09626	1.28039	4.02135	1.46652	2.73804	2.72567
PLEKHJ1	ENSG00000104886.5	493	7.14428e-06	5.87665e-05	1.06474	2.43343	3.09752	2.39916	3.27979	3.06926
PDE4B	ENSG00000184588.13	494	1.06747e-07	1.47066e-06	2.29585	1.37595	4.69044	2.84699	2.4821	3.07457
PPID	ENSG00000171497.4	494	6.91598e-05	0.000415943	2.25933	1.81039	2.84457	1.22673	1.27184	3.16424
POP7	ENSG00000172336.4	495	3.13912e-07	3.82293e-06	1.44049	2.18994	3.64323	1.80573	3.16053	3.22305
C7orf25	ENSG00000136197.8	497	7.30085e-05	0.000435738	2.14235	2.21762	2.21502	2.46645	2.50018	2.92546
FAIM	ENSG00000158234.8	498	1.09664e-07	1.50159e-06	2.85541	2.34297	4.73696	3.40259	3.8408	2.73203
OGFOD1	ENSG00000087263.12	503	7.42188e-07	8.18448e-06	3.20472	2.94315	3.05633	1.65103	2.41593	1.51528
ITPA	ENSG00000125877.8	507	5.26838e-06	4.47726e-05	2.14263	1.84377	3.23436	2.2268	3.11754	1.59156
POLR1D	ENSG00000186184.11	518	3.55073e-06	3.16549e-05	1.77654	2.03712	2.15731	2.47282	2.41305	2.72436
LSM10	ENSG00000181817.5	519	1.4311e-07	1.89645e-06	2.90178	2.75988	4.43137	2.91839	3.52615	2.29587
C9orf89	ENSG00000165233.13	521	2.62369e-07	3.24884e-06	2.72939	3.37687	4.02313	4.0551	3.52108	1.60863
TRNT1	ENSG00000072756.12	521	2.51056e-06	2.3735e-05	3.36263	3.78946	3.30432	3.66072	3.43053	3.11145
MTERFD2	ENSG00000122085.12	521	3.06384e-06	2.79029e-05	3.52978	3.43421	3.81457	3.53521	3.80469	3.31866
AES	ENSG00000104964.10	523	5.00289e-05	0.000314304	1.63507	1.16882	2.28529	1.41423	2.09563	2.4999
SLC31A1	ENSG00000136868.9	526	1.66902e-07	2.18032e-06	2.21778	2.2178	3.58568	2.10596	2.01489	1.95648
MRP63	ENSG00000173141.4	527	5.38459e-07	6.14591e-06	1.38422	1.72083	2.10216	2.37868	1.74381	1.69627
ELOF1	ENSG00000130165.6	528	0.000102926	0.000583767	1.50762	1.68149	2.46892	2.25364	2.84553	3.26326
PSMD8	ENSG00000099341.7	529	2.75957e-06	2.55636e-05	1.20672	2.7369	2.62352	2.42475	1.75757	1.39013
DGKE	ENSG00000153933.5	529	8.00266e-05	0.000469383	2.75706	2.23539	1.6839	1.26963	2.56926	2.85432
PGD	ENSG00000142657.16	530	3.2296e-06	2.92084e-05	1.64538	2.80402	3.60589	2.25244	3.50298	1.32843
MRPL38	ENSG00000204316.8	536	3.27671e-05	0.000217018	2.17352	1.60472	2.64584	1.19504	1.91765	2.70143
GLRX	ENSG00000173221.9	540	1.4122e-06	1.43954e-05	4.78645	2.23539	1.07493	2.33918	2.96413	1.26614
SGCB	ENSG00000163069.8	540	0.000124102	0.000689617	2.55136	2.52714	2.22458	2.90957	1.7012	3.15577
MRPL34	ENSG00000130312.2	541	4.18726e-07	4.93044e-06	2.06414	3.81665	4.31511	4.06064	3.69814	2.04222
MYL12A	ENSG00000101608.8	543	1.94771e-07	2.49846e-06	1.542	1.41724	3.19568	2.10454	2.01202	1.02122
NT5C3A	ENSG00000122643.14	543	1.59636e-06	1.5981e-05	2.82295	1.50099	3.40147	2.70779	3.19879	2.16395
BMPR1B	ENSG00000138696.6	544	6.56691e-05	0.000398474	3.05464	4.09099	3.20736	3.25234	2.72267	4.09099
C3orf52	ENSG00000114529.8	548	7.62238e-06	6.20141e-05	3.36305	2.53468	2.82126	3.12169	3.8399	2.65141
IGFBP5	ENSG00000115461.4	548	6.15961e-05	0.000377709	3.80946	3.01916	3.69567	1.54702	1.89182	3.77241
IMP3	ENSG00000177971.7	550	3.58143e-07	4.27633e-06	2.6268	2.61593	3.99637	3.91938	3.24823	1.95576
AGTR1	ENSG00000144891.13	550	2.74028e-05	0.000187035	3.06562	3.00567	3.06562	3.06562	3.06562	3.06562
FAM83F	ENSG00000133477.12	553	2.12574e-05	0.000150476	1.46563	1.6409	1.69554	1.19784	1.21619	1.64308
HMOX2	ENSG00000103415.7	554	2.42033e-07	3.02882e-06	1.51582	1.96636	4.50132	3.07142	2.51648	1.0006
RARS	ENSG00000113643.4	554	6.58106e-07	7.35583e-06	2.54947	2.65768	3.70546	3.72938	2.43634	1.03079
MRPS27	ENSG00000113048.12	556	8.03856e-07	8.72909e-06	2.27903	3.26531	3.37681	3.71645	2.95494	1.86678
SLC25A4	ENSG00000151729.6	558	3.0568e-06	2.7855e-05	2.79479	3.11904	3.11578	1.68747	2.90878	2.08109
IMP4	ENSG00000136718.5	560	2.64616e-07	3.27358e-06	1.27412	1.10402	3.98315	3.16015	2.309	1.85939
THEM6	ENSG00000130193.7	560	7.64399e-07	8.35283e-06	2.27244	3.36589	3.75427	3.32552	3.02504	2.66756
TMEM25	ENSG00000149582.11	562	5.43305e-06	4.6022e-05	1.02831	2.83981	3.02498	3.33287	3.39227	2.72974
TMEM38B	ENSG00000095209.7	564	1.4688e-06	1.48754e-05	3.20079	3.33585	3.59953	3.30201	3.15845	2.49356
DTNA	ENSG00000134769.17	564	1.07001e-06	1.12369e-05	3.75994	1.60275	3.80709	1.51287	3.14266	2.96739
TMEM106B	ENSG00000106460.14	565	9.33849e-06	7.41153e-05	2.08588	3.58673	3.37199	3.86713	3.07666	3.51646
ST6GALNAC4	ENSG00000136840.14	566	2.34034e-06	2.23146e-05	1.11576	3.37724	3.28051	3.24879	3.15449	2.6265
SPG20	ENSG00000133104.8	568	8.13092e-05	0.000475657	3.04017	1.68811	2.65482	2.38567	1.61316	3.08917
TEX264	ENSG00000164081.8	570	1.33086e-05	0.000100148	3.04219	3.2896	2.64885	3.26327	3.25994	3.25501
GRPEL2	ENSG00000164284.10	571	5.34608e-05	0.000333187	2.58975	3.14768	2.9158	3.06879	2.76725	3.12262
UQCRC1	ENSG00000010256.6	572	3.13521e-07	3.82115e-06	3.23462	3.29822	3.9656	2.8496	3.2119	2.907
TREX1	ENSG00000213689.5	574	9.18778e-05	0.000528585	3.1579	1.99317	4.18759	2.8063	3.23504	4.2292
ALAD	ENSG00000148218.11	576	2.59019e-06	2.43114e-05	2.26754	2.57424	3.23399	3.23511	3.11975	2.25439
CRTAP	ENSG00000170275.10	580	5.12008e-06	4.37888e-05	1.06319	1.40126	2.55161	2.73821	2.74585	1.35223
TOP1MT	ENSG00000184428.8	582	6.1667e-05	0.000377709	1.35446	2.47276	2.95329	2.05672	1.41989	2.77491
ZFP36L1	ENSG00000185650.8	583	6.01629e-06	5.04162e-05	1.01084	-3.00428	1.35599	-1.23362	-1.131	-2.35107
PDCD2	ENSG00000071994.6	585	1.34937e-05	0.000101128	1.21715	2.01036	3.33568	1.3353	1.95658	2.94825
SEH1L	ENSG00000085415.11	590	1.73631e-06	1.71622e-05	2.76104	3.08664	3.42466	1.53685	3.04832	1.72961
ACAA1	ENSG00000060971.13	594	8.36914e-05	0.000487587	2.71109	2.01742	2.72493	2.29229	2.359	2.8964
OTUD6B	ENSG00000155100.6	595	9.75762e-07	1.03444e-05	2.53324	3.16179	3.60912	2.90005	3.18871	1.84932
ITGAE	ENSG00000083457.7	604	4.25288e-07	4.99642e-06	1.32841	2.28669	4.25469	2.81509	3.40658	2.27619
IFITM3	ENSG00000142089.11	606	4.30749e-07	5.0492e-06	3.57869	-2.93409	-6.50427	-1.39838	-3.87986	-4.18214
STAP2	ENSG00000178078.7	606	6.24667e-05	0.00038141	2.04622	1.5146	2.58152	2.26401	2.88319	2.90818
GADD45GIP1	ENSG00000179271.1	608	1.51162e-06	1.52498e-05	2.31358	2.74917	2.85009	3.14099	1.62644	1.54908
HIST1H2BN	ENSG00000233822.3	609	0.000229848	0.00116959	1.487	1.31559	1.6113	1.36622	1.1913	-3.55606
ABHD14B	ENSG00000114779.15	610	4.25608e-06	3.70353e-05	3.56504	2.92721	2.71618	3.02709	3.06012	2.48075
KCND2	ENSG00000184408.5	611	3.88963e-05	0.000252165	3.27088	3.27088	3.27088	3.27088	3.27088	3.27088
BRK1	ENSG00000254999.2	612	1.60258e-06	1.6033e-05	1.15137	1.18989	1.47117	2.53721	1.60192	1.91882
HEG1	ENSG00000173706.8	615	8.37669e-05	0.000487845	2.48648	2.30432	2.55311	2.2551	2.04093	2.49562
ENOX1	ENSG00000120658.8	616	1.41875e-05	0.000105895	3.06014	3.18787	2.96642	3.20879	3.20879	2.85997
CBS	ENSG00000160200.13	617	3.25409e-05	0.000215885	1.68294	1.6147	2.3221	2.32733	1.32189	2.11056
GNG12	ENSG00000172380.5	620	4.89352e-06	4.20439e-05	3.74733	1.49772	1.41509	2.37667	1.81393	1.04088
UQCRFS1	ENSG00000169021.4	621	3.47616e-06	3.11143e-05	1.84102	1.96095	1.12193	2.9721	2.18048	2.82261
NDRG3	ENSG00000101079.16	622	4.77863e-07	5.53507e-06	2.61808	2.21264	3.87205	2.544	2.68383	1.52409
UACA	ENSG00000137831.10	626	0.000187422	0.000985447	2.7428	1.70027	1.60532	1.75879	1.06333	2.8353
METTL21B	ENSG00000123427.11	632	1.9255e-06	1.8783e-05	3.32661	2.18787	2.05173	4.24503	3.36335	2.93711
UBE2G2	ENSG00000184787.14	635	5.47388e-07	6.2251e-06	1.50947	1.5703	3.34322	2.71845	1.98606	2.63834
THG1L	ENSG00000113272.9	642	6.26676e-06	5.23189e-05	2.96513	2.83872	2.73901	2.75221	2.85187	1.95052
CDK7	ENSG00000134058.6	644	9.6093e-06	7.5966e-05	3.49904	1.99706	2.10323	1.92842	3.54155	-1.10768
RCL1	ENSG00000120158.7	646	3.40232e-06	3.05759e-05	3.08461	2.9334	3.91918	2.47288	3.53376	2.22823
DRG2	ENSG00000108591.5	647	6.80224e-06	5.61597e-05	2.84392	2.25926	2.55414	1.37906	2.41517	2.22821
C15orf38-AP3S2	ENSG00000250021.3	649	1.58579e-05	0.000116912	1.60593	2.29084	2.9449	-2.30213	2.39061	2.76037
NDUFB10	ENSG00000140990.10	650	6.40592e-07	7.18575e-06	1.07596	2.08475	2.90918	2.53491	2.02858	1.0889
PIP4K2C	ENSG00000166908.13	653	6.6982e-07	7.47608e-06	2.13485	1.80313	3.18525	2.0893	2.59334	1.95172
C11orf52	ENSG00000149300.5	654	3.47351e-06	3.11084e-05	1.40471	3.91914	3.61077	4.30881	3.50986	1.88139
PEX11B	ENSG00000131779.6	654	0.000154302	0.000835463	1.2854	1.44815	3.3723	2.07741	1.96194	3.38632
SLC25A38	ENSG00000144659.6	656	3.74416e-06	3.31526e-05	3.46329	2.55393	3.54406	3.02707	3.24923	2.56758
PPA1	ENSG00000180817.7	657	2.66072e-06	2.48244e-05	1.2742	1.39567	2.61079	1.10703	2.6513	1.10088
MARCKS	ENSG00000155130.5	658	7.67987e-06	6.24169e-05	-3.60491	-2.9922	2.70154	-3.02047	-1.14099	1.88393
SLC30A5	ENSG00000145740.14	658	0.000315398	0.00153689	2.13141	2.03121	2.50228	1.56064	1.59002	2.86166
COQ9	ENSG00000088682.9	662	7.47429e-07	8.22473e-06	3.2223	2.7893	4.05697	1.79025	2.4874	2.17464
ANXA4	ENSG00000196975.10	662	6.53286e-06	5.43085e-05	1.19358	2.48025	3.7195	1.66119	1.93329	3.25981
MDM2	ENSG00000135679.17	662	2.33277e-05	0.000162773	1.81905	2.15308	1.31454	2.28833	2.9727	2.08754
CYHR1	ENSG00000187954.8	666	1.08794e-05	8.44039e-05	1.40504	3.13231	2.62514	3.04847	1.67211	1.51967
MPP1	ENSG00000130830.10	667	8.32298e-05	0.000485259	3.30928	3.08507	2.62849	3.13763	3.18787	3.1605
PELO	ENSG00000152684.10	668	7.24589e-06	5.94771e-05	2.94815	3.13457	3.27842	2.46662	2.82749	1.58097
ANKRD29	ENSG00000154065.12	669	0.000115497	0.000647323	2.38734	1.74839	2.29941	2.11854	2.3766	2.38734
ZNF511	ENSG00000198546.10	672	2.51209e-05	0.000173889	1.12015	2.282	3.23101	3.35855	3.71067	3.13327
DHX29	ENSG00000067248.5	674	9.79547e-06	7.71942e-05	2.72047	2.05908	2.31928	2.05297	1.97722	1.55016
LARS	ENSG00000133706.13	676	3.02627e-06	2.76311e-05	1.80964	1.64782	2.34191	2.90416	1.34602	1.58911
ERMARD	ENSG00000130023.11	677	0.000169611	0.000903339	1.4503	2.56436	2.7781	2.59284	3.13884	3.2528
THAP4	ENSG00000176946.7	678	0.000339334	0.00163669	2.10764	2.14445	2.59865	2.07219	1.65353	3.03756
ECE2	ENSG00000145194.13	680	1.25166e-06	1.29105e-05	2.11388	2.55569	3.76088	3.6005	2.17796	1.77329
APEH	ENSG00000164062.8	682	1.60727e-05	0.000118161	3.13395	2.5558	2.83071	3.31867	3.43584	3.23386
NUDCD3	ENSG00000015676.13	689	1.00595e-06	1.06284e-05	2.46744	2.47924	3.04532	2.14189	2.19276	2.18192
HINT2	ENSG00000137133.6	696	4.58843e-06	3.95749e-05	1.878	2.71457	3.0939	3.5174	2.69345	2.99959
FAM47E-STBD1	ENSG00000118804.7	699	0.000145647	0.000795486	2.33231	2.34031	2.39913	2.30293	2.32644	2.46786
TIMM9	ENSG00000100575.9	702	1.27658e-05	9.67336e-05	3.45228	2.71368	3.38856	1.18538	2.30667	2.74638
WDYHV1	ENSG00000156795.2	705	1.28341e-05	9.71848e-05	3.59377	2.79562	3.47723	2.66356	2.75003	2.2301
SYS1	ENSG00000204070.5	706	4.7752e-06	4.10725e-05	2.77509	2.13056	3.15221	1.28054	2.14101	1.9808
ITGA2	ENSG00000164171.6	707	4.23453e-06	3.69299e-05	2.18379	2.04145	1.25412	2.99331	1.52997	1.24698
HMGCS2	ENSG00000134240.7	707	0.000204173	0.00105927	2.16028	4.27102	3.64762	2.78651	4.04637	4.27102
CCDC152	ENSG00000198865.5	711	1.34894e-05	0.000101128	-3.4011	2.54933	1.45767	2.76801	3.07247	1.28194
GPR22	ENSG00000172209.4	712	4.44067e-06	3.84702e-05	3.16564	3.08237	2.44461	4.1597	3.57663	1.83293
LARP1	ENSG00000155506.12	714	1.68753e-06	1.67614e-05	1.66767	1.73566	2.68049	1.66928	1.34739	1.22785
SURF2	ENSG00000148291.5	715	2.93261e-06	2.68799e-05	2.30041	2.82304	3.26186	3.0991	1.90171	2.03368
MRPS12	ENSG00000128626.7	718	1.52682e-06	1.53734e-05	1.78068	2.07586	3.59163	3.12604	1.82407	2.19065
DDX10	ENSG00000178105.5	720	6.91625e-06	5.70648e-05	1.98174	2.61604	3.88518	3.4307	3.57197	1.74316
NSMCE4A	ENSG00000107672.10	726	1.68168e-06	1.67173e-05	2.46917	2.27231	3.68655	1.99403	3.13387	2.31228
AARSD1	ENSG00000266967.2	726	7.58173e-06	6.18121e-05	3.52389	2.61776	2.96217	3.62956	2.33694	-1.78896
TVP23B	ENSG00000171928.9	730	2.31987e-06	2.216e-05	1.73797	3.51869	4.05246	2.06138	3.42525	3.03406
PCMTD2	ENSG00000203880.7	732	1.6896e-06	1.67641e-05	1.42001	1.64638	3.35439	2.22453	2.43118	1.76317
KIAA1430	ENSG00000164323.8	732	2.15216e-06	2.07608e-05	2.46294	2.45676	3.35621	2.46842	2.84135	2.64333
MFSD6	ENSG00000151690.10	734	4.8357e-06	4.157e-05	1.55701	2.548	3.61412	2.0076	2.78714	3.01048
LRRC6	ENSG00000129295.4	735	0.000250292	0.00125927	1.28859	2.34623	2.51592	2.74077	1.76523	2.69894
ARHGDIA	ENSG00000141522.7	736	1.6394e-05	0.000120292	2.30483	1.45273	2.38111	1.81257	2.00269	2.08721
MYO3B	ENSG00000071909.14	736	0.000129183	0.000713792	1.29495	2.40106	2.40386	2.40753	2.16352	2.40753
SSFA2	ENSG00000138434.12	737	1.55545e-05	0.000114837	2.95975	-1.67864	3.80957	2.98714	2.38816	3.26233
AK9	ENSG00000155085.11	738	0.000387491	0.00182671	1.73809	2.29699	2.60545	2.01742	2.68723	2.80778
P4HTM	ENSG00000178467.13	740	3.0545e-05	0.000204641	1.55264	2.86021	2.31827	2.71561	2.5314	2.27342
DHRS7	ENSG00000100612.9	742	1.69853e-05	0.000123938	3.44736	2.86093	1.1036	1.61952	2.47615	1.59776
HADHA	ENSG00000084754.6	745	1.83667e-06	1.80289e-05	1.6063	1.87379	2.91145	1.90636	1.97768	1.76591
PAIP2B	ENSG00000124374.8	747	0.000133594	0.00073531	2.33052	2.28826	2.16115	2.15233	2.33817	2.3375
PTDSS1	ENSG00000156471.8	748	7.87362e-06	6.38257e-05	2.67895	3.30536	3.62782	3.06361	2.78243	1.03083
KLHL42	ENSG00000087448.5	748	5.98645e-05	0.000367964	1.48064	1.94862	1.98749	2.49531	1.60093	2.18342
SLC40A1	ENSG00000138449.6	750	5.1323e-06	4.38545e-05	-1.34068	1.4779	4.29362	3.59983	3.67244	3.12503
SLC43A1	ENSG00000149150.4	751	0.000157616	0.000850461	2.40207	2.47404	2.43866	2.47926	2.36493	2.47926
TRMT12	ENSG00000183665.4	757	4.51779e-06	3.90734e-05	3.56206	3.42609	3.91441	3.46996	2.9044	1.36281
AK2	ENSG00000004455.12	758	7.34862e-06	6.02572e-05	1.12734	-1.05562	2.69594	2.98863	1.56308	1.43543
CYB561D2	ENSG00000114395.6	759	2.82224e-05	0.00019146	3.03468	2.73177	3.41534	3.31668	3.46409	1.75117
MRTO4	ENSG00000053372.4	760	2.07251e-06	2.00668e-05	1.77108	2.59819	3.00434	2.67248	2.31257	2.08003
CLIP1	ENSG00000130779.15	760	4.46522e-05	0.000284178	2.04253	2.10955	2.2284	1.84069	2.75809	1.7937
KM-PA-2	ENSG00000204775.4	762	1.13522e-05	8.77047e-05	1.39454	2.38779	2.55916	2.37668	1.47234	1.97505
DLX2	ENSG00000115844.6	765	1.142e-05	8.80977e-05	2.9293	2.86948	3.02101	2.36278	2.83403	1.71936
TUBB6	ENSG00000176014.8	766	0.000351871	0.00168521	2.52921	2.70192	2.63507	1.53926	1.60325	2.88245
HTATIP2	ENSG00000109854.9	771	8.4034e-06	6.76294e-05	2.25198	1.72697	3.60183	3.88317	2.52378	2.31434
RPF1	ENSG00000117133.6	773	2.41299e-06	2.28906e-05	2.49208	2.01541	3.71806	1.66822	2.98497	2.23637
CRYAB	ENSG00000109846.3	775	1.13146e-05	8.74573e-05	4.02128	3.61398	4.04162	3.86883	-1.02029	2.44858
SNRNP25	ENSG00000161981.6	776	4.52238e-05	0.000287197	1.36168	1.64478	3.21196	2.31771	3.31714	1.05507
TRMT1	ENSG00000104907.8	777	8.18541e-06	6.61133e-05	2.80588	2.68129	2.79257	2.99849	2.38344	1.68323
TMEM70	ENSG00000175606.6	779	2.60729e-06	2.44042e-05	2.77335	2.95162	3.63156	2.60861	2.26737	1.2079
OSTF1	ENSG00000134996.11	779	5.74711e-06	4.84201e-05	1.79652	2.93004	3.29809	2.37362	2.58769	1.51311
CCPG1	ENSG00000260916.1	779	5.28333e-05	0.000330065	1.71196	1.41458	2.52422	2.14242	2.7969	2.38346
DUS1L	ENSG00000169718.13	780	0.000108857	0.00061351	3.0728	1.83494	3.31003	2.14514	2.71972	2.95756
ZNF561	ENSG00000171469.6	781	0.000629833	0.00274692	2.34421	1.74035	2.82667	1.99827	2.70922	3.34272
MRPL40	ENSG00000185608.4	782	2.07509e-05	0.000147559	2.96558	2.94459	3.01729	2.87006	2.28849	1.69555
MBP	ENSG00000197971.10	787	2.31325e-05	0.0001617	2.84744	1.63132	2.70649	1.65809	1.68541	1.95714
NKX3-1	ENSG00000167034.9	789	4.23844e-05	0.000271625	1.45723	-3.61424	1.5814	-1.25861	1.58922	1.48082
SACM1L	ENSG00000211456.6	789	0.000260664	0.00130599	1.38296	2.10407	2.56486	1.72887	2.65198	2.79315
UBE3C	ENSG00000009335.13	793	2.8414e-06	2.62284e-05	1.14447	1.64399	3.10412	1.69273	1.89384	2.0972
FKBP11	ENSG00000134285.6	793	2.64263e-05	0.000181638	3.41612	2.42513	1.60984	2.7107	2.60388	2.56678
IMPA1	ENSG00000133731.5	796	2.85021e-06	2.62633e-05	3.02616	2.57685	3.47663	2.67794	2.73335	1.89375
SRM	ENSG00000116649.5	797	3.04388e-05	0.000204279	2.42012	2.36101	3.24851	2.9257	3.08843	1.24182
MPP5	ENSG00000072415.4	798	0.000689447	0.00296096	1.23831	1.31115	2.35424	2.23537	2.12255	2.79154
SYPL1	ENSG00000008282.3	799	6.17094e-05	0.000377709	1.16583	1.96958	2.60011	2.2869	2.87741	1.47185
ATP5SL	ENSG00000105341.14	801	1.59225e-05	0.000117277	2.41773	3.23291	4.19268	2.9363	2.3031	3.24295
EIF4E3	ENSG00000163412.8	801	4.47695e-05	0.000284809	1.29041	2.94342	2.03545	2.36414	2.43549	2.49256
FTSJ2	ENSG00000122687.13	802	2.93114e-06	2.68799e-05	2.31968	2.28844	4.06517	3.12769	2.75429	2.14834
CD58	ENSG00000116815.11	804	2.99525e-06	2.74059e-05	3.40467	2.52006	4.40373	2.59675	2.36442	1.5981
TBRG4	ENSG00000136270.9	806	3.02345e-06	2.76311e-05	2.67897	2.64913	3.42364	2.09686	2.81266	2.41173
S100A10	ENSG00000197747.4	808	6.71538e-05	0.000405908	2.87378	-2.4309	-1.43589	-2.41851	-4.4765	-2.91733
INSIG2	ENSG00000125629.10	809	3.13928e-06	2.8507e-05	2.93921	2.56101	4.33853	2.06882	3.16794	2.55507
NPRL2	ENSG00000114388.8	812	3.15144e-06	2.85841e-05	3.05818	3.17653	4.01622	2.99146	3.07078	2.08057
SIAH1	ENSG00000196470.7	813	3.08042e-05	0.000206201	3.54149	2.29479	2.77919	1.26468	2.87791	1.25025
RRP8	ENSG00000132275.6	814	7.00881e-05	0.000420879	1.37145	1.23662	2.10317	1.30573	2.44698	1.86146
WDR12	ENSG00000138442.5	816	3.21747e-06	2.91155e-05	1.2266	3.00284	4.19782	2.73195	3.05549	1.6639
ALG5	ENSG00000120697.4	817	6.21297e-06	5.19531e-05	2.38219	3.56666	4.04652	3.12443	2.48186	2.48729
SCYL3	ENSG00000000457.9	818	2.2837e-05	0.000160135	2.21148	1.12026	3.2271	2.52538	2.52169	2.68207
OSTM1	ENSG00000081087.10	821	5.84085e-06	4.90775e-05	1.63761	2.1613	3.08967	1.16499	2.28784	2.51586
MT1G	ENSG00000125144.9	823	3.36831e-05	0.000221769	4.67647	4.38425	-1.13775	1.03461	4.56614	-1.51816
COX15	ENSG00000014919.8	826	6.5002e-06	5.40658e-05	1.66977	1.88544	3.15167	2.94246	2.42298	1.13925
FAM120AOS	ENSG00000188938.11	831	1.33385e-05	0.000100325	2.32605	2.6916	3.09818	3.10486	2.63277	1.49444
RBM18	ENSG00000119446.9	831	7.41508e-05	0.000441544	2.21918	1.22679	2.85683	2.60117	3.07481	2.02545
C7orf41	ENSG00000180354.11	831	0.000818816	0.00342257	1.36218	1.38908	1.48442	1.2234	1.71742	2.00983
MPI	ENSG00000178802.13	832	0.000819667	0.00342521	1.42658	2.00008	2.58405	2.53712	2.26755	2.82926
RBM5	ENSG00000003756.12	838	3.81962e-05	0.00024845	2.99263	1.46362	1.73171	1.17651	1.94765	1.14678
NDUFAF3	ENSG00000178057.10	840	1.43845e-05	0.000107212	1.05782	2.56062	1.99323	2.96228	2.68512	1.4665
RABGGTA	ENSG00000100949.10	841	0.000864292	0.00358296	2.21903	2.26206	2.27751	2.33829	1.98156	2.83339
DIXDC1	ENSG00000150764.9	844	2.74321e-05	0.000187154	2.37252	2.81268	2.79384	2.75485	2.8259	2.33807
DALRD3	ENSG00000178149.12	846	0.000900159	0.00370434	1.13601	1.91069	1.45282	1.09261	1.67794	2.40798
IL18	ENSG00000150782.7	847	0.000900204	0.00370434	1.83184	1.92094	1.75151	1.73028	2.02721	2.25555
ARFIP2	ENSG00000132254.8	849	5.01803e-05	0.000315002	1.40279	1.50676	2.96341	2.4403	3.08597	2.41583
PLRG1	ENSG00000171566.7	852	4.25473e-06	3.70353e-05	2.41709	2.41287	3.6795	2.21317	1.21025	1.4811
ANAPC7	ENSG00000196510.8	855	4.09876e-05	0.000263635	1.61407	2.45493	3.0393	2.81718	2.85074	1.291
SLC25A20	ENSG00000178537.5	855	0.000194345	0.00101502	2.76636	2.6081	2.83463	2.71423	2.89292	2.72815
ZBTB8OS	ENSG00000176261.11	857	1.94951e-05	0.000139671	2.62268	1.54076	2.6536	3.06149	2.50257	2.01838
PIN1	ENSG00000127445.9	860	0.000263832	0.00131807	1.32078	1.66243	1.47648	1.32372	2.11816	1.9736
OGDH	ENSG00000105953.10	863	4.56911e-05	0.000289612	2.32438	1.17567	1.96801	1.15773	2.14887	1.2112
ABHD17C	ENSG00000136379.7	869	5.09721e-05	0.000319331	2.95097	2.80484	1.20257	1.69891	2.99627	2.03186
NME5	ENSG00000112981.3	871	0.000508166	0.0023032	2.58805	2.49754	1.80409	1.43891	2.32233	2.58805
TMCO3	ENSG00000150403.13	873	6.75089e-05	0.000407739	1.34705	1.41263	2.65509	1.29228	2.76996	2.47223
CERS2	ENSG00000143418.15	874	1.72821e-05	0.000125693	2.38111	1.63261	2.70857	3.48187	3.24528	1.47484
STX10	ENSG00000104915.10	875	5.14627e-06	4.39498e-05	1.51127	2.32628	2.92998	2.49266	2.23837	2.07431
ERCC3	ENSG00000163161.8	876	5.15567e-06	4.40061e-05	1.60517	1.54436	3.44538	1.74679	2.29739	1.78432
ZNF593	ENSG00000142684.7	876	7.58395e-05	0.000450202	1.14331	2.01372	1.76169	1.63898	1.73183	1.44825
ZBTB40	ENSG00000184677.12	876	8.95538e-05	0.000516545	2.41542	1.79097	2.20261	2.43186	2.62868	1.85419
SDF2	ENSG00000132581.5	876	0.000942671	0.00384613	1.30517	2.27814	1.49806	1.1913	2.75538	3.30964
PPP1R7	ENSG00000115685.10	877	5.17225e-06	4.40755e-05	2.70672	1.69934	3.73134	2.30946	2.16486	1.71956
NOB1	ENSG00000141101.8	877	2.56569e-05	0.000177129	3.75596	3.05433	3.8131	1.95809	3.2824	2.03468
UBE2E2	ENSG00000182247.5	878	0.00105632	0.00422879	1.95037	2.25892	1.93658	1.6935	1.73896	2.52325
EIF2B1	ENSG00000111361.8	881	5.36834e-06	4.55231e-05	1.91166	1.28364	3.19011	2.04926	2.40783	2.36705
NEK6	ENSG00000119408.12	881	0.000535837	0.00240082	1.38295	1.57214	2.45846	2.24399	2.07638	2.4302
MRFAP1L1	ENSG00000178988.10	883	5.4536e-06	4.61461e-05	1.20599	1.91575	4.05488	1.45419	2.7067	1.36161
TSKU	ENSG00000182704.6	884	0.000370429	0.00175954	1.31382	1.86066	1.51549	2.38074	2.33662	2.47957
CMTM4	ENSG00000183723.8	885	8.03754e-05	0.000471076	1.46262	2.46112	2.37305	2.04099	2.08789	1.52579
AKT1S1	ENSG00000204673.6	886	2.0929e-05	0.00014842	1.33935	1.82403	2.00631	1.38669	1.59428	1.01534
EXOSC7	ENSG00000075914.8	897	1.726e-05	0.000125649	2.07766	2.12544	3.51804	2.81803	3.05592	3.08825
ACOT7	ENSG00000097021.15	897	5.19526e-05	0.000325344	2.34563	3.21804	3.22875	1.33843	3.29816	1.69364
SHROOM3	ENSG00000138771.10	900	6.47398e-06	5.3905e-05	2.1453	2.00586	2.77424	2.17103	2.13743	2.14646
GSTM1	ENSG00000134184.8	900	0.000216084	0.00111148	3.34643	2.5819	-1.15926	3.22329	3.028	2.98947
TP53I11	ENSG00000175274.14	902	2.28632e-05	0.000160248	1.36104	1.1716	2.16601	2.17195	2.03019	1.15355
SPTSSB	ENSG00000196542.4	904	0.000623378	0.00272741	2.6385	2.42778	3.41022	1.10683	2.51093	3.37311
PTP4A3	ENSG00000184489.7	905	0.000767863	0.00324078	1.83035	2.07955	2.15854	1.58889	1.32607	2.20008
DNAJC7	ENSG00000168259.10	907	2.23876e-05	0.00015755	1.44474	1.53684	1.77012	2.92137	2.70961	-1.51921
SLC25A11	ENSG00000108528.9	908	6.75494e-06	5.58282e-05	2.48163	2.55305	3.19767	1.68532	1.98533	2.33635
MPST	ENSG00000128309.12	916	0.000311904	0.00152414	1.70459	1.41393	1.93809	1.2929	1.63972	1.75847
DAPK3	ENSG00000167657.7	926	0.000279931	0.00138434	1.63511	1.1651	1.72034	1.30848	1.90428	1.6927
DESI1	ENSG00000100418.7	927	8.95993e-06	7.14829e-05	2.56704	2.45712	3.08171	2.61446	2.64127	2.43313
ADAM10	ENSG00000137845.10	930	7.56533e-05	0.000449294	-2.39418	1.8685	2.48863	1.62575	1.59567	2.10037
LRP12	ENSG00000147650.7	931	0.00147479	0.00563709	1.82681	2.06415	2.19287	2.18109	1.27859	2.43513
HDDC3	ENSG00000184508.6	939	8.62271e-06	6.91253e-05	1.52748	2.30555	3.21239	2.54341	2.50274	2.24823
ISCU	ENSG00000136003.11	939	2.09216e-05	0.00014842	1.82888	1.49032	3.49603	2.96695	3.15918	1.28421
QTRTD1	ENSG00000151576.6	943	8.4025e-05	0.000488801	2.88908	1.05219	2.48788	1.97367	2.27143	1.76792
FAM219B	ENSG00000178761.10	944	0.000379062	0.0017919	1.25014	1.37516	3.09155	2.25728	2.73393	2.83769
SSTR2	ENSG00000180616.4	945	0.00031018	0.00151619	2.26752	2.07262	2.26752	2.26752	2.26752	2.22073
AP1AR	ENSG00000138660.7	950	9.05742e-06	7.21135e-05	1.38901	2.42628	3.00794	1.89705	2.08546	2.23362
VPS4A	ENSG00000132612.14	950	1.52331e-05	0.000112784	2.28099	2.43208	3.02558	1.94072	2.27475	2.39881
RHEB	ENSG00000106615.5	950	2.43622e-05	0.000169245	2.06893	2.08117	2.82597	2.33286	1.78616	1.15594
HDDC2	ENSG00000111906.13	951	9.07364e-06	7.22059e-05	1.07978	2.18324	3.53908	1.47847	2.25044	1.04466
TRAPPC5	ENSG00000181029.7	956	0.000127711	0.000707371	2.16883	2.69807	2.19583	2.48904	2.19605	2.50359
POLR3H	ENSG00000100413.12	957	3.06777e-05	0.000205442	2.09256	2.53529	2.50899	2.90813	2.08742	1.44378
CGREF1	ENSG00000138028.10	957	0.000477808	0.00218784	1.64227	1.79937	1.24219	1.80594	1.18994	1.71205
OXR1	ENSG00000164830.13	958	0.000706457	0.0030158	1.30088	2.36901	1.62222	2.08505	1.66577	2.65496
TMEM69	ENSG00000159596.6	962	1.36911e-05	0.000102434	3.35195	2.10692	3.81198	3.31486	2.80532	1.87274
ALS2	ENSG00000003393.10	962	4.06632e-05	0.000262099	1.64905	2.83265	3.07894	2.1643	2.56601	2.17295
CYB5D2	ENSG00000167740.5	962	0.00141058	0.00544219	2.08424	1.87764	1.35046	1.83235	1.39199	2.18732
SMOC2	ENSG00000112562.14	965	0.00070072	0.0029964	2.21894	2.11695	1.24114	2.26325	1.69954	2.26325
GAL	ENSG00000069482.6	969	0.000840827	0.00350053	1.54521	1.75203	1.82091	1.71812	1.6205	1.82091
RPP14	ENSG00000163684.7	970	0.000170227	0.000905385	2.46739	2.65487	2.70127	1.67941	3.22335	2.35951
MBLAC2	ENSG00000176055.9	972	0.000360636	0.00172139	2.00923	2.27544	2.17446	2.28737	2.15395	2.12589
HIST1H4H	ENSG00000158406.2	978	5.31796e-05	0.000331964	4.2178	2.40332	1.68118	4.28562	3.90555	-2.00657
CLCC1	ENSG00000121940.11	980	3.54238e-05	0.000232155	1.79034	2.22692	2.07466	2.41509	1.78466	1.50408
SCAMP5	ENSG00000198794.7	980	0.000942778	0.00384613	1.56383	1.61658	1.60451	1.48608	1.82243	1.80305
IRAK1	ENSG00000184216.7	981	1.56072e-05	0.000115118	2.48633	2.19548	2.8575	2.0532	1.17406	1.24871
GPR108	ENSG00000125734.9	981	0.00190794	0.00701727	1.26059	1.45288	1.98824	1.42153	2.20203	2.75138
MARS	ENSG00000166986.8	982	1.1791e-05	9.05582e-05	1.92812	1.80543	3.55818	1.87208	2.13234	1.84696
THAP6	ENSG00000174796.8	982	0.000154465	0.000836057	2.21496	3.14729	2.97362	2.43276	2.94637	2.66426
PXK	ENSG00000168297.11	984	9.0749e-05	0.000522668	2.57798	2.57747	2.47918	1.79972	2.64945	1.35415
AP3S2	ENSG00000157823.12	988	8.65551e-05	0.000500911	1.41382	1.45054	2.54494	-2.90135	2.62492	2.29816
CBLL1	ENSG00000105879.7	989	0.00182771	0.00675807	1.35039	1.44941	2.25003	2.00367	2.41328	2.70681
GNG10	ENSG00000242616.3	990	1.23407e-05	9.39034e-05	1.52248	2.78235	3.34803	2.49143	2.28271	1.96491
ASNSD1	ENSG00000138381.5	992	1.25423e-05	9.52517e-05	1.3957	2.02236	3.36115	1.80935	2.34552	1.29069
SMN1	ENSG00000172062.12	992	0.000190853	0.000999456	2.24606	1.95922	1.69394	2.03926	2.67346	1.20642
TSR1	ENSG00000167721.6	992	0.000242776	0.0012254	2.0553	1.72786	2.58001	1.42652	2.19902	2.44595
SAMD13	ENSG00000203943.4	993	0.000411673	0.00192562	3.0647	3.06081	3.0647	2.85653	3.0647	3.0647
LYSMD2	ENSG00000140280.9	997	0.000315155	0.00153619	2.44352	2.58072	2.58057	2.40949	2.49092	2.46027
LMTK2	ENSG00000164715.5	998	1.29149e-05	9.76773e-05	1.68858	1.38283	2.44908	1.61915	1.69858	1.07174
TMEM43	ENSG00000170876.7	1002	0.000226573	0.00115668	2.21305	1.07784	2.29157	1.26518	2.3413	2.21721
MON1A	ENSG00000164077.9	1008	0.00103169	0.00415147	1.49316	1.54451	1.76553	1.63179	1.70849	1.76553
ABCB7	ENSG00000131269.11	1012	1.43603e-05	0.000107082	2.11367	1.87366	3.30218	2.80486	1.86231	1.50892
HS6ST2	ENSG00000171004.13	1014	0.000562193	0.00250171	1.6351	1.61101	1.7831	1.09174	1.78531	1.68464
MRPL49	ENSG00000149792.4	1015	1.487e-05	0.000110409	1.30054	1.01871	3.36756	1.84545	1.69125	1.30414
SRA1	ENSG00000213523.5	1016	0.000136335	0.000749337	2.32853	1.94351	2.39302	1.63816	2.04423	1.17077
SEMA6A	ENSG00000092421.12	1019	0.000438764	0.00203227	2.86004	2.26448	2.5943	2.66214	2.35841	2.58373
DCTN2	ENSG00000175203.11	1028	1.6156e-05	0.000118718	2.05833	2.40699	3.25524	2.79126	1.6486	2.23966
TMEM41A	ENSG00000163900.6	1028	0.000205981	0.00106759	1.22318	-3.11753	1.404	-1.57317	1.18869	-1.15405
SMPDL3B	ENSG00000130768.10	1030	0.00020635	0.0010688	2.16219	2.94235	2.63834	1.89067	2.51603	2.26519
ZNF66	ENSG00000160229.7	1033	0.00114495	0.00454061	2.62144	2.44067	2.32127	2.48487	2.48151	2.6685
GNPDA2	ENSG00000163281.7	1035	0.00146424	0.00560497	1.8819	2.48428	2.53703	2.30475	2.77167	2.88747
ZFAND2B	ENSG00000158552.8	1036	1.72806e-05	0.000125693	2.37977	1.80555	3.59531	1.88567	1.98696	2.11418
CTSC	ENSG00000109861.11	1036	2.69575e-05	0.00018464	1.01163	1.62903	4.26724	3.59454	2.12894	3.19968
ZADH2	ENSG00000180011.6	1036	0.000237686	0.00120359	2.14296	1.56815	2.27846	1.11393	2.49567	1.62812
PPAPDC2	ENSG00000205808.4	1037	0.00105521	0.00422543	1.9653	1.96711	2.1109	1.55322	2.48372	2.30878
ZNF562	ENSG00000171466.5	1041	0.000865596	0.00358742	1.58971	1.81898	1.60549	2.5249	2.59899	2.76356
FECH	ENSG00000066926.6	1050	8.22902e-05	0.000480497	2.55759	1.97136	2.71748	2.50901	2.15205	1.95003
ZNF121	ENSG00000197961.7	1051	1.91871e-05	0.000137944	1.09996	1.7188	3.57197	3.21755	2.42309	2.45087
PAM	ENSG00000145730.16	1051	0.000540022	0.00241338	2.49365	2.95919	3.07519	2.00082	-2.35011	2.80457
C15orf40	ENSG00000169609.9	1054	0.00106967	0.00427132	1.39422	2.50368	2.87042	2.3854	2.57441	2.82127
C19orf10	ENSG00000074842.3	1055	0.00269428	0.00938736	1.90586	1.39378	1.56686	1.83521	1.62689	2.71981
CCDC43	ENSG00000180329.9	1058	5.4495e-05	0.000339092	2.49156	1.21331	2.76895	2.60116	2.07995	1.88734
SDR39U1	ENSG00000100445.12	1062	0.000177209	0.000936787	1.97479	2.6921	2.3465	2.03706	2.76581	1.41042
TBCB	ENSG00000105254.7	1065	0.00026322	0.00131585	1.74231	2.36022	1.78225	1.81605	1.70481	1.17033
VDR	ENSG00000111424.6	1067	2.07312e-05	0.000147553	1.36573	1.50322	2.41025	1.44698	1.81593	1.53068
PIGH	ENSG00000100564.4	1067	0.000141586	0.000775749	2.28215	1.40779	2.33969	2.96734	2.89487	1.95999
TST	ENSG00000128311.9	1067	0.000265131	0.00132125	2.3865	2.95808	2.46068	2.11103	1.9801	2.45106
CCDC126	ENSG00000169193.7	1068	0.000433685	0.00201412	1.84918	1.5009	1.84103	3.40133	2.74069	3.00358
STEAP4	ENSG00000127954.8	1070	0.00106903	0.00426984	3.79192	3.04274	1.08455	3.86534	3.49918	3.83233
HMBS	ENSG00000256269.2	1075	3.51324e-05	0.000230438	1.80841	3.07021	3.76697	3.18691	3.2575	2.46385
CARS	ENSG00000110619.12	1077	2.11758e-05	0.000150034	1.85211	1.06938	3.04644	2.74962	2.33619	2.33232
SCOC	ENSG00000153130.13	1080	2.14013e-05	0.00015129	-2.09423	2.21983	3.32812	1.89607	2.62349	2.265
SMAD2	ENSG00000175387.11	1082	2.85577e-05	0.000193312	1.92767	2.34436	2.79716	1.23806	1.88885	1.41064
PIK3C3	ENSG00000078142.7	1088	0.000206173	0.00106823	3.25673	2.64376	2.75659	1.05507	2.68215	1.36369
SLC43A2	ENSG00000167703.10	1093	5.43775e-05	0.000338496	1.40929	1.27014	1.64401	1.35864	1.43693	1.27197
PCK2	ENSG00000100889.7	1094	0.000155259	0.000839484	2.31337	2.17451	2.76893	2.6047	2.67677	1.43333
HERC3	ENSG00000138641.11	1097	5.87726e-05	0.000362678	2.12266	1.57779	3.21862	2.5155	1.81679	2.58827
COMMD9	ENSG00000110442.7	1099	7.17568e-05	0.000429415	2.33622	1.84014	2.86686	3.03609	2.34384	1.94006
GUF1	ENSG00000151806.9	1103	0.000313829	0.00153191	1.64197	2.48697	2.26946	1.41401	1.50793	1.68548
TBC1D4	ENSG00000136111.8	1113	4.85048e-05	0.000306081	1.94112	1.48339	3.22943	1.71189	1.46011	2.50476
ZNF320	ENSG00000182986.8	1113	0.000153145	0.000830349	2.45611	2.85238	2.79702	1.4587	2.81878	1.86889
PPP2R1B	ENSG00000137713.11	1115	0.000123338	0.000685862	2.12681	1.71779	3.48878	3.19677	3.22937	2.09624
PRKAG1	ENSG00000181929.7	1117	2.80422e-05	0.000190402	1.59402	1.87108	3.23653	1.62476	2.71075	2.2504
FAM168B	ENSG00000152102.13	1127	2.91532e-05	0.000196749	1.05746	1.26625	2.54164	1.91105	1.61971	1.63424
CYP2R1	ENSG00000186104.6	1128	0.000230746	0.00117339	2.5966	2.11856	2.88456	2.55047	2.90391	2.61652
UBR3	ENSG00000144357.12	1134	8.86715e-05	0.000511833	1.11164	1.9907	2.52579	2.64186	2.32743	1.21902
PGPEP1	ENSG00000130517.9	1136	0.000100647	0.000572923	3.28183	2.75853	3.54281	2.90937	2.97009	2.24835
CSRP1	ENSG00000159176.9	1137	0.000265525	0.00132272	3.35074	1.54225	2.03379	1.18413	2.93533	1.26461
EML4	ENSG00000143924.14	1141	9.62995e-05	0.000550781	-1.5748	-2.51158	-1.43941	-3.39305	-1.05315	-2.2111
DEPTOR	ENSG00000155792.5	1154	0.00015773	0.000850784	1.62257	1.90795	2.41457	1.83978	2.24608	1.64598
EMC6	ENSG00000127774.6	1156	3.27834e-05	0.000217034	1.74735	2.27608	3.3539	1.67387	2.58647	1.71697
TCTA	ENSG00000145022.4	1157	0.000278472	0.00137974	3.1987	3.04957	2.52168	2.88866	2.33988	1.6336
FAM216A	ENSG00000204856.7	1160	0.000635184	0.00276668	1.93085	2.56488	2.44612	2.52519	2.33614	2.37173
TYW3	ENSG00000162623.11	1163	6.42639e-05	0.000391162	2.43692	1.70311	2.78264	2.00249	1.62258	1.59582
ABHD14A	ENSG00000248487.4	1163	0.00210633	0.00761191	2.05949	1.65345	1.69662	2.17813	1.47693	2.1396
SPRYD4	ENSG00000176422.10	1164	0.000150035	0.0008166	2.90016	2.49734	2.78361	2.93826	2.6011	2.17609
SNX17	ENSG00000115234.6	1166	0.000303006	0.00148351	2.2696	2.10816	2.31226	1.17487	2.15658	1.98111
TTC4	ENSG00000243725.2	1176	0.000135176	0.000743493	2.13421	1.73721	2.39484	2.71376	2.52279	1.76701
LYRM5	ENSG00000205707.6	1177	0.000103117	0.000584611	1.50547	1.44512	2.85806	1.21603	2.5683	1.60187
UBAC1	ENSG00000130560.4	1180	3.89373e-05	0.000252326	1.09203	1.8716	2.75707	2.43615	1.36807	1.70353
C14orf119	ENSG00000179933.4	1183	3.97907e-05	0.000257004	1.98049	2.20014	3.489	2.99843	1.86163	2.27643
GEMIN6	ENSG00000152147.6	1183	7.74753e-05	0.000457508	1.79628	2.76334	3.06044	2.42227	1.7256	1.73146
EMC7	ENSG00000134153.5	1193	0.000140238	0.000768901	1.66624	1.50334	1.55204	2.88902	1.65265	1.59011
CDKN2AIPNL	ENSG00000237190.3	1193	0.000159671	0.000858591	2.31162	2.82008	2.4834	3.02704	2.56244	1.24046
RMND5A	ENSG00000153561.8	1196	4.39685e-05	0.000280169	1.53523	1.23853	3.002	2.45581	2.43165	1.8335
SESN2	ENSG00000130766.4	1199	0.00149066	0.00567693	2.14134	1.48436	2.31136	1.3731	1.37285	2.11971
RNMTL1	ENSG00000171861.6	1200	0.000261834	0.00130975	2.58982	1.94273	2.83792	1.56743	2.76121	2.38068
WWC1	ENSG00000113645.9	1201	0.000146486	0.000799614	1.85672	1.81802	1.25382	2.19814	1.78072	1.90679
RAD1	ENSG00000113456.14	1202	0.000531267	0.0023865	1.7603	2.87006	2.47235	2.28977	3.06206	2.64486
RAD17	ENSG00000152942.14	1203	0.000266336	0.00132549	2.20905	2.39496	2.4176	2.56079	2.55106	1.43328
TMEM80	ENSG00000177042.10	1205	0.000542137	0.00242142	1.50928	1.79994	1.26582	2.1493	2.65854	2.06143
EXOSC2	ENSG00000130713.11	1207	4.66033e-05	0.000295221	1.15027	2.6212	3.4698	2.65595	2.49359	1.40533
TRIQK	ENSG00000205133.7	1207	7.71723e-05	0.000456408	1.59883	1.99084	3.3306	1.8211	2.93214	1.57782
RPP14	ENSG00000255154.3	1209	0.000550282	0.00245253	2.14691	1.96824	2.32578	1.63107	2.771	1.82061
C12orf5	ENSG00000078237.4	1210	9.366e-05	0.000537651	3.07591	2.6425	3.49897	1.22084	2.85839	2.77212
SMIM20	ENSG00000250317.4	1223	9.40932e-05	0.000539742	1.32138	2.61488	2.92686	1.94737	2.54392	2.14041
VPS41	ENSG00000006715.11	1224	0.000230416	0.00117209	2.44441	2.26314	2.38854	2.65022	2.48806	2.42279
GLS2	ENSG00000135423.8	1233	0.00166303	0.00624216	1.95065	2.11875	1.87974	2.09276	1.87315	2.00352
CHCHD10	ENSG00000250479.4	1240	0.00280038	0.0096687	2.1892	1.6836	2.46746	2.05717	1.22627	2.43001
QDPR	ENSG00000151552.7	1241	0.000613285	0.00269002	1.90719	3.19511	2.96193	2.27335	2.50136	1.08351
FDX1	ENSG00000137714.2	1243	9.1957e-05	0.000528753	1.39141	1.62432	2.37663	2.33533	1.84055	1.58736
TCAIM	ENSG00000179152.14	1250	0.000689635	0.00296096	1.7747	2.29229	2.94297	2.46585	3.09234	2.51517
FAM203B	ENSG00000230567.3	1276	0.000321263	0.00156206	1.16985	2.01856	2.05565	1.91603	2.05847	1.52501
PPFIBP1	ENSG00000110841.9	1278	0.000731216	0.00310623	1.96517	2.414	1.99301	1.94047	1.98328	1.15673
PPIL3	ENSG00000240344.4	1279	0.000606031	0.00266194	2.31467	2.36567	3.38189	2.67612	2.99956	2.99185
UBLCP1	ENSG00000164332.6	1282	0.00094007	0.00383809	2.51631	2.21403	2.62004	1.9211	1.20604	2.48008
DPH2	ENSG00000132768.9	1283	0.000566906	0.00252196	2.75411	2.44246	2.75846	2.76238	2.13466	2.63387
RAMP1	ENSG00000132329.6	1287	0.000224843	0.00114898	2.95607	2.87702	1.85757	2.9476	2.90586	1.76724
MPLKIP	ENSG00000168303.6	1290	7.45696e-05	0.0004437	1.52409	1.01477	1.85385	1.43916	1.06043	1.40381
TTLL12	ENSG00000100304.12	1292	0.000231516	0.00117654	1.4116	1.64872	1.44098	1.8806	1.04625	1.53843
NLN	ENSG00000123213.18	1293	0.000156994	0.000847398	1.8179	2.15323	2.40675	1.56166	1.71178	1.43567
MXRA7	ENSG00000182534.9	1297	0.00214011	0.00771797	2.14108	1.9105	1.36288	1.61628	1.03116	1.93845
KRCC1	ENSG00000172086.7	1305	0.000248348	0.0012503	1.19566	2.23851	2.23006	3.03047	1.85862	2.29786
DYNLT3	ENSG00000165169.6	1305	0.000452424	0.0020875	2.41404	2.65152	2.15263	2.11912	2.74853	1.28733
MRPL10	ENSG00000159111.8	1307	0.000240222	0.00121384	2.44539	2.42324	2.70444	2.4309	1.4986	1.32626
OBFC1	ENSG00000107960.6	1309	0.000698986	0.00299125	2.38237	2.33172	2.70853	3.06116	3.22061	2.43239
RABL3	ENSG00000144840.4	1314	8.50108e-05	0.000493435	1.54949	1.93165	3.54249	2.18382	2.71982	1.49719
ZBTB25	ENSG00000089775.7	1318	0.000260802	0.00130626	2.52001	1.75583	2.45025	2.73846	2.452	2.07706
SMUG1	ENSG00000123415.10	1321	0.000264573	0.00132008	1.51247	2.81039	3.08465	3.53764	2.9702	2.22325
SMAD1	ENSG00000170365.5	1325	9.16064e-05	0.000527412	2.08524	2.32058	3.42831	1.96231	2.87991	2.71892
ARMC6	ENSG00000105676.9	1330	9.45365e-05	0.000541887	2.08088	1.91599	2.73875	2.0666	2.30242	1.491
TOM1L2	ENSG00000175662.13	1333	0.000389475	0.00183495	1.9509	1.83058	2.05086	1.5641	1.99045	1.76099
HBA2	ENSG00000188536.8	1333	0.000495974	0.00225912	2.54396	2.46955	2.54396	2.19516	2.54396	2.22507
STAT2	ENSG00000170581.9	1335	0.00190787	0.00701727	-2.05965	-2.19913	-1.84089	-1.32035	-2.27679	-2.2744
STXBP2	ENSG00000076944.10	1336	0.00091985	0.00376734	1.05324	1.10203	2.65417	1.55557	1.71692	2.41717
RPP25L	ENSG00000164967.5	1337	0.000468201	0.00214826	1.6182	2.23265	3.14374	2.70263	2.08476	2.64563
NMRK1	ENSG00000106733.16	1338	0.000152078	0.000825999	1.20132	2.56657	2.82158	2.80653	2.17758	2.18391
EMB	ENSG00000170571.7	1343	0.00136076	0.00527339	2.13318	1.24764	2.12544	1.7426	1.40632	1.9297
HAUS1	ENSG00000152240.8	1355	0.00105384	0.00422212	2.62668	1.25627	2.40657	2.0828	2.93897	-1.09039
SCRIB	ENSG00000180900.12	1358	0.000265706	0.0013232	1.80089	1.56912	2.66733	1.26047	1.15162	2.12254
LRRC16A	ENSG00000079691.15	1359	0.000113141	0.000635254	-1.13094	2.25589	3.2383	1.51876	1.39272	2.10097
SMKR1	ENSG00000240204.2	1366	0.000550211	0.00245253	2.63777	2.26844	2.66653	2.80163	2.69248	2.40582
HMGCL	ENSG00000117305.10	1368	0.000816535	0.00341669	2.07067	2.72741	2.68211	2.26748	2.43886	1.4806
DBNL	ENSG00000136279.14	1370	0.000827864	0.00345485	2.0214	1.87353	1.74855	1.41869	1.31752	1.33242
TBC1D16	ENSG00000167291.11	1373	0.000766222	0.00323647	1.3968	1.50219	1.86092	1.11869	1.56064	1.596
SFXN3	ENSG00000107819.9	1377	0.000388845	0.00183254	1.52673	1.88555	1.88138	1.96341	1.55807	1.39577
TMED8	ENSG00000100580.7	1387	0.000364295	0.00173567	1.88258	1.84788	2.37162	2.13155	2.15355	1.09084
ETHE1	ENSG00000105755.3	1388	0.000133904	0.000736755	1.77199	1.40738	3.69342	1.69484	1.99272	2.56952
ZNF776	ENSG00000152443.8	1388	0.000970985	0.00394679	1.9219	1.67752	2.27859	1.01524	2.341	1.15206
CNTN3	ENSG00000113805.8	1393	0.00191145	0.00702784	1.62741	1.69143	1.69143	1.69143	1.67883	1.69143
BCAT2	ENSG00000105552.10	1396	0.000158244	0.000852674	1.68369	2.56124	2.94692	2.18554	2.33643	1.33375
DDA1	ENSG00000130311.6	1401	0.000913366	0.00374667	1.16808	1.1839	1.63147	1.27479	1.65675	1.03887
PLS1	ENSG00000120756.8	1403	0.000434546	0.00201632	1.8561	2.06512	2.19573	2.67661	2.01009	1.9119
CCDC132	ENSG00000004766.11	1406	0.000168914	0.000900242	2.10455	2.64335	3.05805	2.27171	2.18399	2.42127
FAM203A	ENSG00000235173.2	1406	0.000651324	0.00282518	1.07816	2.02396	2.09637	1.87957	2.10336	1.43543
TMEM115	ENSG00000126062.3	1407	0.00290453	0.0099514	1.68389	1.76774	1.63231	1.17386	1.56573	1.78287
CPSF2	ENSG00000165934.8	1410	0.000152892	0.000829268	2.11232	2.05143	2.78282	2.21272	1.76376	1.20577
CEPT1	ENSG00000134255.9	1411	0.000153328	0.000831054	2.0442	1.90014	2.99838	1.85644	1.95739	1.94509
ERICH2	ENSG00000204334.7	1415	0.00241912	0.00856844	1.45574	1.45574	1.2999	1.34416	1.45574	1.45574
RPS19BP1	ENSG00000187051.4	1418	0.000158768	0.000854908	2.10649	1.89684	2.68547	2.43175	1.96517	1.30884
HMGN4	ENSG00000182952.4	1418	0.00123247	0.00483619	2.63984	2.98461	2.37146	2.51091	2.50674	1.13999
POLR3C	ENSG00000186141.4	1422	0.000354872	0.0016975	3.02639	1.53387	3.31097	1.19578	1.92145	1.54094
TMEM126B	ENSG00000171204.8	1426	0.000161591	0.00086718	2.56095	2.46969	3.66793	3.00086	2.48369	1.08184
SNX1	ENSG00000028528.10	1428	0.00140586	0.00542668	2.10953	1.75578	1.66687	1.99571	2.52912	2.04407
ARL16	ENSG00000214087.4	1432	0.00082174	0.00343204	1.44336	1.8676	2.76306	1.53065	2.02621	2.40843
CISH	ENSG00000114737.11	1433	0.00208252	0.00753629	1.88776	2.11364	1.53449	2.0798	2.31011	2.06477
TYW1	ENSG00000198874.8	1443	0.000175981	0.000931869	1.99208	1.80745	2.45419	2.08878	1.95183	1.64694
DNMT3A	ENSG00000119772.12	1449	0.000788118	0.00331552	-2.38656	-2.34556	-1.71677	-2.50191	-1.39791	-2.3741
LYRM4	ENSG00000214113.6	1454	0.00117597	0.00463773	2.20494	1.68929	1.93238	1.23838	1.49578	1.7966
TTC39A	ENSG00000085831.11	1458	0.0015939	0.0060188	2.86015	2.02737	1.86469	2.54205	3.11454	1.32577
CENPV	ENSG00000166582.5	1460	0.00108394	0.00432057	2.63644	2.37868	2.36337	1.8381	2.3759	2.01576
HBA1	ENSG00000206172.4	1463	0.000534915	0.00239738	2.48602	2.48602	2.42177	2.18429	2.48602	2.07404
ZP3	ENSG00000188372.10	1466	0.00142346	0.00547971	2.17077	2.60898	2.53084	2.1768	2.06055	2.21179
RPF2	ENSG00000197498.8	1468	0.000194477	0.00101503	1.73416	1.88597	2.84515	1.25743	1.95382	2.06235
FAM63A	ENSG00000143409.11	1473	0.00058441	0.00258773	1.65114	1.47495	1.22245	2.28027	1.4172	1.3026
DNAJA3	ENSG00000103423.9	1474	0.000197818	0.00103109	1.14893	1.70085	2.50796	1.82743	1.8141	1.46192
GAMT	ENSG00000130005.7	1476	0.000595901	0.00262461	1.90253	1.59273	1.45727	2.2935	1.87481	1.73047
MICALCL	ENSG00000133808.4	1480	0.000808462	0.00338653	1.76016	1.91118	1.90126	1.93259	2.01986	1.15332
ORC5	ENSG00000164815.6	1483	0.000206844	0.001071	1.38672	1.9907	3.25973	2.53138	2.34288	1.66034
FCHO2	ENSG00000157107.9	1483	0.00169226	0.00633817	1.91166	1.25117	1.76449	1.97969	2.45421	1.63981
ORAI1	ENSG00000182500.7	1487	0.00123177	0.00483464	2.01666	1.86874	1.60273	1.88632	1.72327	1.25355
ABCA5	ENSG00000154265.11	1489	0.000646554	0.00280838	2.36874	1.93023	2.20877	2.69494	1.39791	1.84102
SLC35A4	ENSG00000176087.10	1496	0.000854569	0.00354548	2.43582	2.47057	1.69829	2.02076	1.28057	1.03498
CISD2	ENSG00000145354.5	1500	0.000448996	0.00207414	1.69008	2.14376	2.57719	1.20592	2.31889	1.92358
ELP6	ENSG00000163832.11	1523	0.00192583	0.00707572	2.1867	1.78502	2.19555	2.18465	2.51521	2.10915
SNRNP35	ENSG00000184209.14	1531	0.000249945	0.00125793	1.64361	1.75375	3.31606	2.15911	2.3618	1.41544
NSUN4	ENSG00000117481.6	1539	0.000529309	0.00238	1.43962	1.30675	2.52078	2.5507	1.28124	1.84109
FABP5	ENSG00000164687.6	1541	0.000263578	0.00131722	2.50308	-1.22002	3.71709	2.48473	1.0185	1.73935
RHOU	ENSG00000116574.4	1541	0.00080443	0.00337507	3.07526	1.16499	3.21368	2.15421	2.38011	2.17304
RRAS2	ENSG00000133818.8	1544	0.00163509	0.00614909	2.50507	1.7313	1.36321	2.30906	1.83171	2.12868
ZNF737	ENSG00000237440.4	1550	0.000680892	0.00293389	1.67719	2.12604	3.09447	2.70831	2.80341	1.2134
MYD88	ENSG00000172936.8	1552	0.000279256	0.00138231	2.1259	2.01815	3.11205	2.08799	1.95851	2.08609
CALM3	ENSG00000160014.12	1554	0.00028206	0.00139355	1.26338	1.53834	2.85366	1.69951	1.7614	-1.20278
SAT2	ENSG00000141504.7	1562	0.00213595	0.00770648	1.10635	2.29593	2.23179	1.81186	1.75616	2.03888
MZT2A	ENSG00000173272.9	1578	0.00108364	0.00432057	1.43273	1.23527	1.86084	2.30135	2.20694	1.08065
POC5	ENSG00000152359.10	1581	0.00116569	0.00460534	1.55506	2.0796	1.95915	2.18141	1.97828	1.32292
C12orf10	ENSG00000139637.9	1583	0.000492408	0.00224483	1.6343	2.04733	2.93089	2.73724	2.57368	1.7985
HPRT1	ENSG00000165704.10	1583	0.00178623	0.0066282	2.35375	2.70241	2.67971	1.41812	2.24985	1.37454
FAM86A	ENSG00000118894.10	1587	0.00121738	0.00478414	1.25863	1.98121	2.40665	1.78229	2.37382	1.58111
FXN	ENSG00000165060.7	1590	0.000334912	0.00161986	1.5753	1.93775	2.65631	1.98217	1.96184	1.67386
NIPSNAP3A	ENSG00000136783.9	1592	0.00033603	0.00162457	1.00646	2.36941	3.20103	2.76382	2.41675	1.71825
SLCO4A1	ENSG00000101187.11	1603	0.00216508	0.00779358	2.41135	1.62266	2.39222	2.32222	2.15764	2.12909
RFT1	ENSG00000163933.5	1607	0.000883451	0.00364981	2.50928	2.45759	2.5262	1.84606	1.64045	1.91893
SGSH	ENSG00000181523.8	1607	0.0013028	0.0050828	1.86512	1.85785	2.04683	1.51506	2.04902	1.70485
TMEM55A	ENSG00000155099.3	1612	0.00175353	0.00652701	2.62585	2.47894	2.39376	2.01518	1.57671	2.18726
B9D1	ENSG00000108641.10	1617	0.00132977	0.00516946	1.90987	2.4136	2.04337	2.32987	2.41227	1.89896
SNX18	ENSG00000178996.8	1619	0.00128418	0.00501643	2.03308	1.99961	1.14774	1.83991	1.36125	1.09392
SAMM50	ENSG00000100347.10	1625	0.00107224	0.00427939	2.1669	1.73939	2.47924	2.63621	1.71808	1.40228
SLC31A2	ENSG00000136867.6	1630	0.00132997	0.00516946	1.46946	2.71227	2.75359	2.25433	2.05329	2.21502
COQ5	ENSG00000110871.10	1636	0.00110458	0.00439613	1.85897	1.47125	2.6416	2.86699	1.6803	1.7828
GNS	ENSG00000135677.6	1638	0.00271455	0.00944958	1.25897	2.13315	2.04955	1.726	1.3014	-1.52939
ZNF639	ENSG00000121864.5	1639	0.00132642	0.00515952	2.76569	1.10949	2.77465	1.86795	1.93789	1.75537
USP39	ENSG00000168883.15	1647	0.000425968	0.00198401	1.09947	1.4097	2.84768	1.66436	1.57655	1.42631
ZFP62	ENSG00000196670.9	1648	0.000426048	0.00198401	1.27557	1.04071	3.13023	1.7578	2.50768	2.18892
NFU1	ENSG00000169599.8	1672	0.000465972	0.00213866	2.09115	1.97179	3.05195	2.33127	1.3887	1.42303
SLC25A46	ENSG00000164209.12	1674	0.00128388	0.00501643	2.16046	1.96933	2.18878	2.56731	1.71298	1.58598
PNP	ENSG00000198805.7	1679	0.00255547	0.00898377	2.67902	-1.10136	2.10091	2.3545	1.74962	-2.50484
RNH1	ENSG00000023191.12	1682	0.000844178	0.00350702	1.07854	1.58576	2.54434	2.36158	1.92065	1.99449
MECR	ENSG00000116353.11	1686	0.00166228	0.00624085	1.73149	2.5235	2.72042	2.62515	1.98015	2.30551
WDR41	ENSG00000164253.8	1688	0.000667439	0.00288547	1.66174	1.14314	2.4225	2.44113	1.35228	1.30638
MRPL1	ENSG00000169288.13	1692	0.000509373	0.00230671	1.03615	1.24745	2.79185	1.76519	2.10982	1.53115
PARL	ENSG00000175193.8	1698	0.000515551	0.00233064	2.61994	1.37723	3.31178	2.26035	2.49101	2.54362
WRB	ENSG00000182093.10	1699	0.00139654	0.00539602	-1.04534	1.13206	2.37854	2.46286	2.22504	1.13657
AGK	ENSG00000006530.11	1710	0.000531828	0.00238834	2.1497	1.86957	2.79778	2.1458	1.72813	2.19854
BET1	ENSG00000105829.7	1714	0.000534437	0.00239593	1.76841	1.94769	2.7565	2.28041	2.1249	1.71746
C9orf91	ENSG00000157693.10	1722	0.00160419	0.0060482	1.23515	1.4397	2.19717	1.73862	2.02474	1.71961
SPRYD3	ENSG00000167778.4	1724	0.00133757	0.00519255	1.30011	2.27269	2.3545	1.77261	2.23405	1.53542
ZNF780A	ENSG00000197782.10	1733	0.00180243	0.00667723	1.32612	2.37564	2.45734	2.26214	2.22071	1.77916
USP48	ENSG00000090686.11	1734	0.000586805	0.00259572	1.63057	1.2093	2.46737	1.09001	1.36708	1.59631
LOH12CR1	ENSG00000165714.6	1746	0.00265783	0.00928934	2.06454	1.9063	2.17024	1.28762	2.25672	1.67451
DTD2	ENSG00000129480.8	1762	0.00200917	0.00731657	1.93022	1.89951	1.81627	1.84422	1.68039	1.06926
HIST1H3D	ENSG00000197409.6	1773	0.00180347	0.00667792	1.69195	1.49328	1.00134	2.58061	2.40176	-1.61579
CCNB1IP1	ENSG00000100814.13	1801	0.000743542	0.00315259	2.34084	1.61326	3.06427	1.98922	2.49306	2.26896
C7orf49	ENSG00000122783.12	1817	0.000795031	0.00334281	2.324	2.21783	3.0368	2.34178	2.49598	2.21562
ECSIT	ENSG00000130159.9	1824	0.00211815	0.00765097	1.43392	1.41241	1.70124	2.00257	1.63884	1.38544
MRPS34	ENSG00000074071.9	1846	0.000914326	0.00374962	1.01014	1.89111	2.68981	1.60894	2.16748	1.36535
RPUSD4	ENSG00000165526.4	1848	0.00125686	0.00492077	1.82104	1.9312	2.39777	2.39039	2.18884	1.88259
DDOST	ENSG00000244038.5	1851	0.000975996	0.00396098	1.14537	1.18564	2.52881	1.16138	2.19443	1.2075
ACOT4	ENSG00000177465.4	1853	0.00193151	0.00708825	1.62435	1.70378	1.26501	1.79011	1.67252	1.26046
XPC	ENSG00000154767.10	1863	0.000980282	0.00397219	1.40471	1.55989	2.47522	2.11714	2.1306	1.29511
RBM28	ENSG00000106344.4	1868	0.000999707	0.00403834	1.01069	1.41547	2.26691	1.80946	1.56609	-1.54699
POLK	ENSG00000122008.11	1871	0.00256687	0.00901981	2.1521	1.83828	1.71899	2.40625	1.92499	1.20639
NHSL2	ENSG00000204131.6	1906	0.00286324	0.0098466	1.50296	1.69366	1.69366	1.33387	1.49837	1.46065
PRR15L	ENSG00000167183.2	1921	0.00198838	0.00725439	1.70482	1.09276	2.52642	2.5764	1.36127	1.29185
CCDC34	ENSG00000109881.12	1940	0.00123658	0.00484743	1.44476	1.34065	2.02791	1.80566	1.37619	1.2797
AP001816.1	ENSG00000254531.1	1951	0.00273162	0.00948967	2.05644	1.82482	2.05644	1.77296	1.84011	1.70079
LRRC57	ENSG00000180979.5	1990	0.00167242	0.00627287	1.34717	1.76861	2.65733	1.13611	2.32053	1.61027
MPV17L2	ENSG00000254858.5	1997	0.00216179	0.00778354	1.05958	2.11511	2.35552	2.39117	1.89768	1.32164
SCO1	ENSG00000133028.6	2011	0.00154087	0.00584255	1.7005	2.05145	2.42287	1.85259	1.87062	1.63779
HDHD2	ENSG00000167220.7	2013	0.00196834	0.00719301	2.1003	1.82881	2.66555	2.65162	2.21795	1.45235
TMEM11	ENSG00000178307.5	2018	0.00157191	0.00595013	-1.31689	1.13504	2.56054	-1.09658	1.36795	1.83621
CINP	ENSG00000100865.10	2073	0.00234987	0.00835871	1.76179	2.14376	2.64438	2.47257	1.80069	1.72458
LRSAM1	ENSG00000148356.9	2124	0.00271287	0.0094458	1.52995	1.74081	1.96838	1.96939	1.38797	1.24311
VAMP5	ENSG00000168899.4	2165	0.0024193	0.00856844	-1.13734	1.64834	2.11595	1.46025	1.12923	1.02573
VPS51	ENSG00000149823.3	2222	0.00283187	0.00976664	1.29246	1.16141	2.24125	1.00748	1.51176	1.34764
